# Supplementary material for: Transcriptional Analysis-Based Alterations Affecting Neuritogenesis of the Peripheral Nervous System in Psoriasis
Source: Life (Basel). 2022 Jan 13;12(1):111. doi: 10.3390/life12010111 (PMC8778302; doi:10.3390/life12010111)
Supplement: Supplementary file 1 [file life-12-00111-s001.zip › life-1489764- supplementary Table S1-for XML.xlsx]

## Sheet: Supplementary Table 1. A
gene	transcript	transcript_type	log2fc_LvsH	FDR_LvsH	log2fc_NLvsH	FDR_NLvsH
5_8S_rRNA	ENST00000637374.1|ENSG00000283568.1|-|-|5_8S_rRNA.6-201|5_8S_rRNA|152|rRNA|	rRNA	0.361052	0.510437	1.38147	0.0277725
7SK	ENST00000365328.1|ENSG00000202198.1|-|-|7SK.1-201|7SK|331|misc_RNA|	misc_RNA	0.165319	0.917473	3.59909	0.00264206
A2M	ENST00000543436.2|ENSG00000175899.14|OTTHUMG00000150267.7|OTTHUMT00000400121.1|A2M-211|A2M|600|processed_transcript|	processed_transcript	-0.513647	0.28121	1.8511	5.22146e-06
AAGAB	ENST00000542650.5|ENSG00000103591.12|OTTHUMG00000172246.3|OTTHUMT00000417475.1|AAGAB-203|AAGAB|1015|protein_coding|	protein_coding	0.49619	0.163735	-1.3324	0.0380557
AAMP	ENST00000422731.1|ENSG00000127837.9|OTTHUMG00000155202.3|OTTHUMT00000338764.1|AAMP-203|AAMP|742|protein_coding|	protein_coding	0.97002	0.16031	2.74924	0.000219807
AARSD1	ENST00000591096.5|ENSG00000266967.6|OTTHUMG00000153515.8|OTTHUMT00000452457.1|AARSD1-216|AARSD1|562|nonsense_mediated_decay|	nonsense_mediated_decay	1.03601	0.0677983	1.92026	0.00305703
AATBC	ENST00000437258.5|ENSG00000215458.8|OTTHUMG00000086882.1|OTTHUMT00000195678.1|AATBC-202|AATBC|932|antisense_RNA|	antisense_RNA	-1.14564	8.52707e-05	-0.942494	0.022124
ABCA2	ENST00000490486.2|ENSG00000107331.16|OTTHUMG00000020958.5|OTTHUMT00000355955.1|ABCA2-220|ABCA2|666|protein_coding|	protein_coding	-1.54054	0.00464475	2.08714	1.36621e-06
ABCA2	ENST00000437791.2|ENSG00000107331.16|OTTHUMG00000020958.5|OTTHUMT00000055203.1|ABCA2-207|ABCA2|697|processed_transcript|	processed_transcript	0.274323	0.717697	1.91824	0.00638981
ABCA8	ENST00000588458.1|ENSG00000141338.13|OTTHUMG00000180192.4|OTTHUMT00000450288.1|ABCA8-210|ABCA8|445|retained_intron|	retained_intron	-0.734416	0.153729	1.49813	0.00119152
ABCC1	ENST00000572882.2|ENSG00000103222.18|OTTHUMG00000048267.5|OTTHUMT00000436390.2|ABCC1-204|ABCC1|4565|protein_coding|	protein_coding	4.06261	0.000421384	3.46691	0.0308513
ABCC1	ENST00000572053.5|ENSG00000103222.18|OTTHUMG00000048267.5|OTTHUMT00000436394.2|ABCC1-203|ABCC1|744|nonsense_mediated_decay|	nonsense_mediated_decay	1.6433	1.30889e-06	1.462	0.00160301
ABCC10	ENST00000372515.8|ENSG00000124574.14|OTTHUMG00000014733.4|OTTHUMT00000358542.2|ABCC10-203|ABCC10|933|protein_coding|	protein_coding	0.638738	0.0900293	-1.6526	0.0261755
ABCC3	ENST00000513589.1|ENSG00000108846.15|OTTHUMG00000162245.5|OTTHUMT00000368091.1|ABCC3-213|ABCC3|582|processed_transcript|	processed_transcript	-2.00036	3.18237e-08	-1.11942	0.015166
ABHD14B	ENST00000483233.5|ENSG00000114779.19|OTTHUMG00000157816.23|OTTHUMT00000349673.1|ABHD14B-206|ABHD14B|2056|protein_coding|	protein_coding	-0.792281	0.127581	1.22817	0.02834
ABHD17A	ENST00000592757.1|ENSG00000129968.15|OTTHUMG00000171872.6|OTTHUMT00000449221.2|ABHD17A-206|ABHD17A|740|nonsense_mediated_decay|	nonsense_mediated_decay	0.559477	0.126981	1.46175	0.00092121
ABI1	ENST00000536334.5|ENSG00000136754.17|OTTHUMG00000017848.3|-|ABI1-213|ABI1|3380|protein_coding|	protein_coding	-0.0921584	0.941816	3.1807	0.000664311
ABLIM2	ENST00000428004.6|ENSG00000163995.19|OTTHUMG00000057427.25|OTTHUMT00000358861.2|ABLIM2-205|ABLIM2|2573|protein_coding|	protein_coding	1.70437	7.71995e-12	0.966379	0.00673544
ABLIM2	ENST00000514025.5|ENSG00000163995.19|OTTHUMG00000057427.25|OTTHUMT00000127606.7|ABLIM2-213|ABLIM2|2974|protein_coding|	protein_coding	-1.6558	0.00395759	-2.77504	0.00130435
ABLIM2	ENST00000512594.5|ENSG00000163995.19|OTTHUMG00000057427.25|OTTHUMT00000127607.4|ABLIM2-212|ABLIM2|2756|retained_intron|	retained_intron	-0.828399	0.175045	1.48057	0.0457292
ABR	ENST00000544583.6|ENSG00000159842.14|OTTHUMG00000090313.17|OTTHUMT00000437250.1|ABR-205|ABR|5595|protein_coding|	protein_coding	1.78913	3.03101e-08	1.0386	0.041529
ABR	ENST00000571120.5|ENSG00000159842.14|OTTHUMG00000090313.17|OTTHUMT00000437262.1|ABR-210|ABR|551|retained_intron|	retained_intron	0.0377735	0.96436	3.52278	1.2398e-09
AC005726.5	ENST00000585189.1|ENSG00000265168.1|OTTHUMG00000179308.1|OTTHUMT00000445710.1|AC005726.5-201|AC005726.5|298|antisense_RNA|	antisense_RNA	-1.50949	0.00733281	-2.48487	0.00507448
AC006064.4	ENST00000602946.1|ENSG00000269968.1|OTTHUMG00000183895.1|OTTHUMT00000467394.1|AC006064.4-201|AC006064.4|422|antisense_RNA|	antisense_RNA	0.654914	0.00051178	-1.4883	2.5505e-06
AC007388.1	ENST00000449569.5|ENSG00000231312.6|OTTHUMG00000152299.2|OTTHUMT00000325723.1|AC007388.1-204|AC007388.1|2517|antisense_RNA|	antisense_RNA	-1.20731	2.74415e-25	-0.391481	0.00166843
AC007952.6	ENST00000573168.1|ENSG00000262319.1|OTTHUMG00000178159.1|OTTHUMT00000440786.1|AC007952.6-201|AC007952.6|2673|antisense_RNA|	antisense_RNA	0.882914	0.0952184	1.57264	0.0186206
AC008655.1	ENST00000595563.1|ENSG00000267815.1|OTTHUMG00000183045.1|OTTHUMT00000464780.1|AC008655.1-201|AC008655.1|457|antisense_RNA|	antisense_RNA	-2.44622	4.63075e-08	-3.79266	0.000113878
AC008738.5	ENST00000587312.1|ENSG00000267727.1|OTTHUMG00000180733.1|OTTHUMT00000450853.1|AC008738.5-201|AC008738.5|482|antisense_RNA|	antisense_RNA	0.649555	0.263349	2.52258	2.17538e-05
AC008982.1	ENST00000594769.5|ENSG00000268083.5|OTTHUMG00000182610.2|OTTHUMT00000462667.2|AC008982.1-201|AC008982.1|963|protein_coding|	protein_coding	0.036248	0.956345	1.70334	0.00483882
AC009041.2	ENST00000565467.1|ENSG00000260807.6|OTTHUMG00000172822.2|OTTHUMT00000420706.2|AC009041.2-205|AC009041.2|3726|lincRNA|	lincRNA	-0.61925	0.286316	1.22764	0.03091
AC010336.4	ENST00000595655.1|ENSG00000268149.1|OTTHUMG00000182573.1|OTTHUMT00000462472.1|AC010336.4-201|AC010336.4|438|antisense_RNA|	antisense_RNA	-0.268582	0.665224	2.10891	0.0019824
AC010889.1	ENST00000566193.1|ENSG00000260197.1|OTTHUMG00000175431.1|OTTHUMT00000429943.1|AC010889.1-201|AC010889.1|2666|lincRNA|	lincRNA	0.241008	0.732862	1.57905	0.0327303
AC011446.2	ENST00000586483.1|ENSG00000267598.1|OTTHUMG00000180791.1|OTTHUMT00000453034.1|AC011446.2-201|AC011446.2|465|antisense_RNA|	antisense_RNA	2.48104	0.000293643	2.6531	0.00344275
AC011603.2	ENST00000547712.1|ENSG00000258017.1|OTTHUMG00000170411.1|OTTHUMT00000409018.1|AC011603.2-204|AC011603.2|418|antisense_RNA|	antisense_RNA	-0.226313	0.51086	1.34366	5.15781e-05
AC012157.1	ENST00000549725.1|ENSG00000258034.1|OTTHUMG00000169460.1|OTTHUMT00000404172.1|AC012157.1-201|AC012157.1|501|antisense_RNA|	antisense_RNA	-0.42105	0.464957	1.54424	0.0306021
AC012615.3	ENST00000592884.2|ENSG00000267125.2|OTTHUMG00000179993.2|OTTHUMT00000449212.2|AC012615.3-201|AC012615.3|500|antisense_RNA|	antisense_RNA	0.506002	0.388751	3.71158	6.5924e-12
AC018557.1	ENST00000569274.1|ENSG00000260465.1|OTTHUMG00000173475.1|OTTHUMT00000423238.1|AC018557.1-201|AC018557.1|1790|antisense_RNA|	antisense_RNA	-1.50591	8.91612e-05	0.844647	0.0357406
AC020763.4	ENST00000623414.1|ENSG00000279569.1|OTTHUMG00000177024.1|OTTHUMT00000434930.1|AC020763.4-201|AC020763.4|4170|TEC|	TEC	-1.37197	1.00311e-14	0.600428	0.00111106
AC025259.3	ENST00000564363.1|ENSG00000259884.1|OTTHUMG00000175694.1|OTTHUMT00000430854.1|AC025259.3-202|AC025259.3|687|lincRNA|	lincRNA	-0.626224	0.270945	-2.04121	0.0150129
AC025283.2	ENST00000618352.1|ENSG00000262621.4|OTTHUMG00000177580.3|-|AC025283.2-203|AC025283.2|2905|protein_coding|	protein_coding	0.374688	0.599167	1.83201	0.0415098
AC034102.2	ENST00000548861.1|ENSG00000257411.1|OTTHUMG00000170152.4|OTTHUMT00000407695.4|AC034102.2-201|AC034102.2|489|protein_coding|	protein_coding	0.740738	0.34444	-4.60035	0.0029988
AC055811.2	ENST00000427497.3|ENSG00000264187.1|OTTHUMG00000179185.1|OTTHUMT00000445187.1|AC055811.2-201|AC055811.2|1693|nonsense_mediated_decay|	nonsense_mediated_decay	-0.0243433	0.947139	1.06511	0.00128792
AC068580.4	ENST00000427721.3|ENSG00000250644.3|OTTHUMG00000161994.5|OTTHUMT00000489875.1|AC068580.4-204|AC068580.4|1007|protein_coding|	protein_coding	1.42697	1.21322e-11	1.0661	0.000125739
AC084024.3	ENST00000520598.1|ENSG00000253356.1|OTTHUMG00000164013.1|OTTHUMT00000376745.1|AC084024.3-201|AC084024.3|562|antisense_RNA|	antisense_RNA	-0.439398	0.442677	1.34528	0.0489368
AC092375.2	ENST00000567370.1|ENSG00000260306.1|OTTHUMG00000175457.1|OTTHUMT00000430026.1|AC092375.2-201|AC092375.2|1665|lincRNA|	lincRNA	-0.846861	0.00556372	-1.11318	0.0226452
AC100810.1	ENST00000517959.1|ENSG00000253982.1|OTTHUMG00000163625.1|OTTHUMT00000374587.1|AC100810.1-202|AC100810.1|917|antisense_RNA|	antisense_RNA	0.584649	0.360424	3.20333	1.91369e-07
AC117498.1	ENST00000548742.1|ENSG00000257653.1|OTTHUMG00000170395.1|OTTHUMT00000408859.1|AC117498.1-201|AC117498.1|713|antisense_RNA|	antisense_RNA	-1.28158	0.000268444	-1.03374	0.0453023
AC123777.1	ENST00000534827.5|ENSG00000254813.5|OTTHUMG00000165476.1|OTTHUMT00000384372.1|AC123777.1-201|AC123777.1|1247|lincRNA|	lincRNA	-2.81966	3.3129e-12	0.917334	0.006126
AC124283.1	ENST00000576912.1|ENSG00000261845.2|OTTHUMG00000177963.1|OTTHUMT00000439994.1|AC124283.1-201|AC124283.1|1190|antisense_RNA|	antisense_RNA	-2.13406	2.08912e-05	-2.3884	0.00128697
AC125494.1	ENST00000396799.3|ENSG00000219410.5|OTTHUMG00000169194.2|-|AC125494.1-203|AC125494.1|1622|antisense_RNA|	antisense_RNA	-1.87942	0.00866728	-2.30708	0.0449034
AC126755.1	ENST00000433020.2|ENSG00000205746.9|OTTHUMG00000166285.2|OTTHUMT00000400300.1|AC126755.1-204|AC126755.1|525|processed_transcript|	processed_transcript	0.130711	0.852248	2.08292	0.00525942
AC126755.2	ENST00000526166.5|ENSG00000233024.7|OTTHUMG00000166286.3|OTTHUMT00000388921.1|AC126755.2-204|AC126755.2|539|retained_intron|	retained_intron	-0.50926	0.267746	1.14982	0.011783
AC126755.2	ENST00000543228.1|ENSG00000233024.7|OTTHUMG00000166286.3|OTTHUMT00000400305.1|AC126755.2-207|AC126755.2|538|processed_transcript|	processed_transcript	-0.354742	0.585437	1.76436	0.00169398
AC129492.7	ENST00000622992.1|ENSG00000279152.1|OTTHUMG00000192074.1|OTTHUMT00000492168.1|AC129492.7-201|AC129492.7|756|TEC|	TEC	0.88372	0.0817187	2.70282	1.27455e-07
AC133550.1	ENST00000563565.1|ENSG00000260570.1|OTTHUMG00000176589.1|OTTHUMT00000432661.1|AC133550.1-201|AC133550.1|295|antisense_RNA|	antisense_RNA	0.0651604	0.920963	-2.28454	0.0044591
AC135178.2	ENST00000582471.1|ENSG00000263809.1|OTTHUMG00000178564.1|OTTHUMT00000442471.1|AC135178.2-201|AC135178.2|3087|nonsense_mediated_decay|	nonsense_mediated_decay	-0.330354	0.0424335	-1.11244	5.7919e-06
AC135457.1	ENST00000503553.3|ENSG00000272742.1|OTTHUMG00000186242.1|OTTHUMT00000472469.1|AC135457.1-201|AC135457.1|664|antisense_RNA|	antisense_RNA	0.0749011	0.89694	1.10499	0.0484782
AC138969.1	ENST00000283050.7|ENSG00000183889.12|OTTHUMG00000133624.3|OTTHUMT00000399246.1|AC138969.1-210|AC138969.1|539|retained_intron|	retained_intron	-0.50926	0.267746	1.14982	0.011783
AC138969.1	ENST00000536260.5|ENSG00000183889.12|OTTHUMG00000133624.3|OTTHUMT00000399241.1|AC138969.1-202|AC138969.1|2519|processed_transcript|	processed_transcript	0.488926	0.232549	1.30444	0.00885364
AC139887.2	ENST00000507446.1|ENSG00000249592.5|OTTHUMG00000160004.1|OTTHUMT00000358827.1|AC139887.2-202|AC139887.2|534|antisense_RNA|	antisense_RNA	0.149035	0.816144	-1.81112	0.0369863
AC145207.2	ENST00000576554.1|ENSG00000262413.1|OTTHUMG00000177881.1|OTTHUMT00000439448.1|AC145207.2-202|AC145207.2|565|antisense_RNA|	antisense_RNA	0.344646	0.623907	2.4038	0.000260166
AC244153.1	ENST00000622796.1|ENSG00000276170.4|OTTHUMG00000188548.1|OTTHUMT00000477605.1|AC244153.1-203|AC244153.1|419|antisense_RNA|	antisense_RNA	2.10053	6.50017e-18	0.94712	0.0101163
ACAD9	ENST00000505867.5|ENSG00000177646.18|OTTHUMG00000159942.3|OTTHUMT00000358409.1|ACAD9-204|ACAD9|2401|nonsense_mediated_decay|	nonsense_mediated_decay	0.432926	0.572237	2.4657	0.0010171
ACAT1	ENST00000528370.1|ENSG00000075239.13|OTTHUMG00000166381.2|OTTHUMT00000389481.1|ACAT1-206|ACAT1|508|protein_coding|	protein_coding	-1.13343	0.0052499	-1.39968	0.0271702
ACBD5	ENST00000375901.5|ENSG00000107897.18|OTTHUMG00000017854.5|OTTHUMT00000047312.2|ACBD5-203|ACBD5|3685|protein_coding|	protein_coding	0.480051	0.657183	2.47946	0.0192029
ACE	ENST00000413513.7|ENSG00000159640.15|OTTHUMG00000154927.4|OTTHUMT00000443838.1|ACE-203|ACE|2237|protein_coding|	protein_coding	-0.246338	0.756825	2.16954	0.0151418
ACKR1	ENST00000435307.1|ENSG00000213088.9|OTTHUMG00000037182.4|OTTHUMT00000090340.3|ACKR1-203|ACKR1|550|protein_coding|	protein_coding	-1.67785	0.000124871	-3.32189	0.000690985
ACOT7	ENST00000377855.6|ENSG00000097021.19|OTTHUMG00000001295.8|OTTHUMT00000003773.1|ACOT7-204|ACOT7|1614|protein_coding|	protein_coding	1.70914	5.24069e-16	0.668646	0.0394006
ACP2	ENST00000529444.5|ENSG00000134575.9|OTTHUMG00000166949.7|OTTHUMT00000392270.1|ACP2-206|ACP2|1719|protein_coding|	protein_coding	0.457445	0.0949966	-1.34969	0.00537462
ACP5	ENST00000218758.9|ENSG00000102575.10|OTTHUMG00000182036.2|OTTHUMT00000458879.1|ACP5-201|ACP5|1630|protein_coding|	protein_coding	1.52855	5.01906e-09	0.895557	0.0251198
ACTA1	ENST00000366683.3|ENSG00000143632.14|OTTHUMG00000038006.3|-|ACTA1-201|ACTA1|1122|protein_coding|	protein_coding	-1.74787	0.00525432	-2.05466	0.0439665
ACTB	ENST00000473257.1|ENSG00000075624.13|OTTHUMG00000023268.7|OTTHUMT00000324029.1|ACTB-209|ACTB|556|processed_transcript|	processed_transcript	0.188141	0.755424	1.71867	0.00643297
ACTB	ENST00000493945.5|ENSG00000075624.13|OTTHUMG00000023268.7|OTTHUMT00000324022.1|ACTB-213|ACTB|1236|retained_intron|	retained_intron	0.00402075	0.995027	1.83332	0.00104546
ACTG1	ENST00000572105.6|ENSG00000184009.9|OTTHUMG00000177955.6|OTTHUMT00000439932.3|ACTG1-205|ACTG1|1168|nonsense_mediated_decay|	nonsense_mediated_decay	0.971103	0.0925975	2.62356	3.12954e-05
ACTG1	ENST00000571691.5|ENSG00000184009.9|OTTHUMG00000177955.6|OTTHUMT00000439931.3|ACTG1-203|ACTG1|761|protein_coding|	protein_coding	0.446959	0.238574	1.05294	0.0234595
ACTN1	ENST00000544964.6|ENSG00000072110.13|OTTHUMG00000171386.6|OTTHUMT00000414712.2|ACTN1-206|ACTN1|891|protein_coding|	protein_coding	-0.407488	0.577987	1.80686	0.0125035
ACTN1	ENST00000553290.1|ENSG00000072110.13|OTTHUMG00000171386.6|OTTHUMT00000414713.2|ACTN1-207|ACTN1|619|protein_coding|	protein_coding	-0.730958	0.3743	1.66092	0.0431679
ACTR10	ENST00000553907.1|ENSG00000131966.13|OTTHUMG00000171049.8|OTTHUMT00000412662.1|ACTR10-203|ACTR10|780|nonsense_mediated_decay|	nonsense_mediated_decay	-0.802572	0.186985	-2.01202	0.0261605
ACTR10	ENST00000555337.5|ENSG00000131966.13|OTTHUMG00000171049.8|OTTHUMT00000411643.1|ACTR10-208|ACTR10|705|nonsense_mediated_decay|	nonsense_mediated_decay	0.0917075	0.903065	2.98071	1.89219e-07
ACTR2	ENST00000542850.2|ENSG00000138071.13|OTTHUMG00000129540.3|-|ACTR2-205|ACTR2|1429|protein_coding|	protein_coding	0.624703	0.02522	-2.89233	2.3159e-06
ACTR6	ENST00000550813.5|ENSG00000075089.9|OTTHUMG00000170245.3|OTTHUMT00000408162.1|ACTR6-206|ACTR6|351|processed_transcript|	processed_transcript	-0.151783	0.765909	-2.18976	0.00423507
ACTR8	ENST00000486794.1|ENSG00000113812.13|OTTHUMG00000158279.4|OTTHUMT00000351654.1|ACTR8-203|ACTR8|1202|protein_coding|	protein_coding	1.12679	0.0225283	1.37859	0.0479184
ACVR1B	ENST00000542485.1|ENSG00000135503.12|OTTHUMG00000167920.4|OTTHUMT00000397005.1|ACVR1B-206|ACVR1B|2362|protein_coding|	protein_coding	0.462807	0.47966	2.25568	0.00420069
ACY1	ENST00000638077.1|ENSG00000243989.8|OTTHUMG00000157815.14|OTTHUMT00000489103.1|ACY1-227|ACY1|456|retained_intron|	retained_intron	0.461573	0.0544781	-1.37464	0.00280686
ACY1	ENST00000476854.5|ENSG00000243989.8|OTTHUMG00000157815.14|OTTHUMT00000349662.1|ACY1-207|ACY1|1319|protein_coding|	protein_coding	0.72881	0.178835	1.78124	0.0170469
ACY1	ENST00000491318.5|ENSG00000243989.8|OTTHUMG00000157815.14|OTTHUMT00000349661.1|ACY1-209|ACY1|1390|nonsense_mediated_decay|	nonsense_mediated_decay	0.563491	0.378768	1.7059	0.0240226
ACSF2	ENST00000506085.5|ENSG00000167107.12|OTTHUMG00000162128.5|OTTHUMT00000367429.1|ACSF2-210|ACSF2|864|processed_transcript|	processed_transcript	-1.81747	2.42116e-06	-0.977769	0.039053
ACSF3	ENST00000537155.1|ENSG00000176715.15|OTTHUMG00000138044.10|OTTHUMT00000395826.1|ACSF3-207|ACSF3|848|retained_intron|	retained_intron	0.0481905	0.955709	1.70558	0.0391934
ACSL3	ENST00000407441.4|ENSG00000123983.13|OTTHUMG00000133160.5|OTTHUMT00000331006.2|ACSL3-203|ACSL3|538|nonsense_mediated_decay|	nonsense_mediated_decay	-0.114911	0.691166	-1.11496	0.00764889
ACSL3	ENST00000540115.1|ENSG00000123983.13|OTTHUMG00000133160.5|OTTHUMT00000396906.2|ACSL3-210|ACSL3|624|protein_coding|	protein_coding	0.753842	0.0945003	1.54524	0.00448197
ACSM3	ENST00000289416.9|ENSG00000005187.11|OTTHUMG00000131552.6|OTTHUMT00000254414.2|ACSM3-201|ACSM3|2845|protein_coding|	protein_coding	-2.13361	1.03419e-06	-1.33387	0.00870864
ADAM15	ENST00000271836.10|ENSG00000143537.13|OTTHUMG00000013898.5|OTTHUMT00000038982.1|ADAM15-201|ADAM15|2799|protein_coding|	protein_coding	0.427666	0.814811	4.62997	0.000987401
ADAM33	ENST00000356518.6|ENSG00000149451.17|OTTHUMG00000031758.3|OTTHUMT00000077763.2|ADAM33-202|ADAM33|3677|protein_coding|	protein_coding	-0.542283	0.575628	2.76274	0.000130577
ADAMTS10	ENST00000596911.5|ENSG00000142303.13|OTTHUMG00000182216.8|OTTHUMT00000460205.1|ADAMTS10-210|ADAMTS10|545|retained_intron|	retained_intron	-1.21155	5.68082e-06	0.591968	0.034432
ADCK1	ENST00000341211.5|ENSG00000063761.15|OTTHUMG00000171520.2|OTTHUMT00000413869.1|ADCK1-202|ADCK1|1972|protein_coding|	protein_coding	-1.42822	0.00573102	-1.75995	0.0377351
ADCY2	ENST00000489501.1|ENSG00000078295.16|OTTHUMG00000090476.5|OTTHUMT00000313780.1|ADCY2-204|ADCY2|9908|retained_intron|	retained_intron	-1.42651	5.74936e-20	0.399906	0.0125975
ADCY2	ENST00000338316.8|ENSG00000078295.16|OTTHUMG00000090476.5|OTTHUMT00000206930.2|ADCY2-201|ADCY2|6575|protein_coding|	protein_coding	-1.38062	3.7316e-35	0.220139	0.0442954
ADCY3	ENST00000260600.9|ENSG00000138031.14|OTTHUMG00000094765.7|OTTHUMT00000211574.2|ADCY3-201|ADCY3|5050|protein_coding|	protein_coding	-0.924323	0.220611	1.51333	0.0470569
ADD1	ENST00000538860.1|ENSG00000087274.16|OTTHUMG00000122080.21|OTTHUMT00000397212.1|ADD1-223|ADD1|507|processed_transcript|	processed_transcript	-1.38123	0.16487	2.07568	0.00718978
ADGRG1	ENST00000456916.5|ENSG00000205336.11|OTTHUMG00000176742.22|-|ADGRG1-202|ADGRG1|3860|protein_coding|	protein_coding	0.298432	0.709562	2.2592	0.00364455
ADGRG1	ENST00000564338.5|ENSG00000205336.11|OTTHUMG00000176742.22|OTTHUMT00000433626.2|ADGRG1-227|ADGRG1|547|protein_coding|	protein_coding	-0.248417	0.735391	-2.27628	0.0299263
ADGRG1	ENST00000388813.9|ENSG00000205336.11|OTTHUMG00000176742.22|OTTHUMT00000433441.2|ADGRG1-201|ADGRG1|3925|protein_coding|	protein_coding	-1.71079	0.0501907	1.86295	0.0344691
ADGRL1	ENST00000591528.1|ENSG00000072071.16|OTTHUMG00000182138.4|OTTHUMT00000459715.1|ADGRL1-206|ADGRL1|612|processed_transcript|	processed_transcript	0.475552	0.150757	1.0125	0.0103884
ADGRV1	ENST00000640815.1|ENSG00000164199.16|OTTHUMG00000162668.9|OTTHUMT00000370460.2|ADGRV1-237|ADGRV1|1522|protein_coding|	protein_coding	-3.23583	8.67318e-11	0.83254	0.0280034
ADHFE1	ENST00000276576.11|ENSG00000147576.15|OTTHUMG00000150215.4|OTTHUMT00000316869.1|ADHFE1-201|ADHFE1|1830|nonsense_mediated_decay|	nonsense_mediated_decay	-2.17403	0.000247001	-1.9414	0.0419592
ADM	ENST00000526492.4|ENSG00000148926.9|OTTHUMG00000165907.1|OTTHUMT00000387009.1|ADM-204|ADM|641|protein_coding|	protein_coding	1.17097	0.0107455	1.66592	0.00555069
ADPGK	ENST00000456471.2|ENSG00000159322.17|OTTHUMG00000172777.3|-|ADPGK-202|ADPGK|808|protein_coding|	protein_coding	2.32196	0.000139723	2.02452	0.0299395
ADPGK	ENST00000567941.5|ENSG00000159322.17|OTTHUMG00000172777.3|OTTHUMT00000420432.1|ADPGK-210|ADPGK|2716|nonsense_mediated_decay|	nonsense_mediated_decay	0.840139	0.153864	2.13926	0.0011255
ADRA2C	ENST00000330055.6|ENSG00000184160.7|OTTHUMG00000159830.1|OTTHUMT00000357607.1|ADRA2C-201|ADRA2C|2129|protein_coding|	protein_coding	-1.43052	2.56277e-17	0.462404	0.00964819
AFAP1L1	ENST00000515000.1|ENSG00000157510.13|OTTHUMG00000163441.3|OTTHUMT00000373495.1|AFAP1L1-205|AFAP1L1|2319|protein_coding|	protein_coding	0.762623	0.24705	2.05874	0.0192972
AFTPH	ENST00000409933.5|ENSG00000119844.15|OTTHUMG00000129539.6|OTTHUMT00000251729.3|AFTPH-204|AFTPH|2811|protein_coding|	protein_coding	-0.43452	0.146265	-1.01395	0.0291877
AGAP2	ENST00000549129.1|ENSG00000135439.11|OTTHUMG00000170285.5|OTTHUMT00000408774.1|AGAP2-204|AGAP2|608|protein_coding|	protein_coding	2.1733	2.84908e-09	-1.72279	0.0158844
AGPAT3	ENST00000457068.5|ENSG00000160216.18|OTTHUMG00000086892.14|OTTHUMT00000195729.12|AGPAT3-210|AGPAT3|924|protein_coding|	protein_coding	-0.837172	0.21289	1.49601	0.0352069
AGR3	ENST00000310398.6|ENSG00000173467.8|OTTHUMG00000128411.3|OTTHUMT00000250191.2|AGR3-201|AGR3|749|protein_coding|	protein_coding	-4.85195	3.0004e-19	-1.55295	0.0243839
AGRN	ENST00000419249.2|ENSG00000188157.14|OTTHUMG00000040778.5|OTTHUMT00000099680.3|AGRN-202|AGRN|861|protein_coding|	protein_coding	0.0235221	0.974038	2.32966	1.43114e-05
AGRN	ENST00000479707.1|ENSG00000188157.14|OTTHUMG00000040778.5|OTTHUMT00000097993.1|AGRN-208|AGRN|584|retained_intron|	retained_intron	1.29926	0.0154206	2.24259	0.000212299
AHSA1	ENST00000556866.5|ENSG00000100591.7|OTTHUMG00000171539.2|OTTHUMT00000414022.1|AHSA1-211|AHSA1|432|retained_intron|	retained_intron	-0.0161611	0.977233	-1.73416	0.0381863
AIFM2	ENST00000613322.4|ENSG00000042286.14|OTTHUMG00000018398.2|-|AIFM2-204|AIFM2|3247|protein_coding|	protein_coding	0.279392	0.763581	2.21512	0.0109896
AKAP3	ENST00000545990.6|ENSG00000111254.7|OTTHUMG00000168226.3|OTTHUMT00000398911.2|AKAP3-206|AKAP3|3318|protein_coding|	protein_coding	0.111358	0.854524	-1.95008	0.0471582
AKIP1	ENST00000534147.5|ENSG00000166452.11|OTTHUMG00000165653.2|OTTHUMT00000385623.1|AKIP1-210|AKIP1|1022|protein_coding|	protein_coding	-0.433177	0.402706	-2.4613	0.0291828
AKR1A1	ENST00000495913.5|ENSG00000117448.13|OTTHUMG00000007740.4|OTTHUMT00000020858.1|AKR1A1-211|AKR1A1|421|processed_transcript|	processed_transcript	0.538472	0.161397	-3.04418	0.00360048
AKR1C3	ENST00000603484.1|ENSG00000196139.13|OTTHUMG00000017585.6|OTTHUMT00000468455.1|AKR1C3-208|AKR1C3|629|retained_intron|	retained_intron	-0.528818	0.30882	1.33593	0.012991
AKR7A2	ENST00000489286.5|ENSG00000053371.12|OTTHUMG00000002522.2|OTTHUMT00000355684.1|AKR7A2-204|AKR7A2|725|protein_coding|	protein_coding	1.27613	0.0387302	2.33935	0.00168423
AKT1	ENST00000349310.7|ENSG00000142208.15|OTTHUMG00000170795.5|OTTHUMT00000410379.2|AKT1-201|AKT1|2866|protein_coding|	protein_coding	0.744692	0.446857	3.69322	9.22249e-06
AKT1	ENST00000555380.1|ENSG00000142208.15|OTTHUMG00000170795.5|OTTHUMT00000410431.2|AKT1-212|AKT1|534|processed_transcript|	processed_transcript	1.29589	0.0951871	3.72304	1.36621e-06
AKT2	ENST00000584288.5|ENSG00000105221.16|OTTHUMG00000137375.20|OTTHUMT00000441275.1|AKT2-240|AKT2|1706|nonsense_mediated_decay|	nonsense_mediated_decay	2.45438	5.92687e-08	2.33399	7.54053e-05
AL020996.3	ENST00000606617.1|ENSG00000272478.1|OTTHUMG00000185700.1|OTTHUMT00000471021.1|AL020996.3-201|AL020996.3|222|antisense_RNA|	antisense_RNA	-0.721093	0.11414	-2.82836	0.000117181
AL049829.2	ENST00000554010.1|ENSG00000259018.1|OTTHUMG00000171499.1|OTTHUMT00000413774.1|AL049829.2-201|AL049829.2|285|antisense_RNA|	antisense_RNA	-0.324591	0.531223	-2.8543	0.00877288
AL109827.1	ENST00000541176.2|ENSG00000272897.5|OTTHUMG00000186060.1|OTTHUMT00000472146.1|AL109827.1-203|AL109827.1|872|nonsense_mediated_decay|	nonsense_mediated_decay	-1.78012	0.00118272	-2.27984	0.0123031
AL121988.1	ENST00000542839.1|ENSG00000255811.1|OTTHUMG00000167758.1|OTTHUMT00000396124.1|AL121988.1-201|AL121988.1|560|antisense_RNA|	antisense_RNA	-3.96449	1.79334e-14	0.679682	0.0247812
AL137129.1	ENST00000555937.1|ENSG00000258964.1|OTTHUMG00000171115.1|OTTHUMT00000411765.1|AL137129.1-201|AL137129.1|720|processed_transcript|	processed_transcript	0.276162	0.555237	-1.75125	0.0225262
AL355312.3	ENST00000472053.2|ENSG00000273132.1|OTTHUMG00000186262.1|OTTHUMT00000472519.1|AL355312.3-201|AL355312.3|312|antisense_RNA|	antisense_RNA	5.30847	1.0763e-31	1.72547	0.00201072
AL589935.1	ENST00000434683.5|ENSG00000232295.7|OTTHUMG00000015003.5|OTTHUMT00000041159.1|AL589935.1-218|AL589935.1|529|antisense_RNA|	antisense_RNA	-1.69969	0.00124292	-3.65338	7.60844e-05
AL662797.2	ENST00000607333.1|ENSG00000272273.1|OTTHUMG00000185725.1|OTTHUMT00000471079.1|AL662797.2-201|AL662797.2|527|antisense_RNA|	antisense_RNA	-0.479159	0.374389	1.46142	0.0191291
AL669942.1	ENST00000620585.4|ENSG00000274628.4|OTTHUMG00000188369.1|OTTHUMT00000477004.1|AL669942.1-204|AL669942.1|4236|retained_intron|	retained_intron	-0.340676	0.55627	1.48539	0.00475311
ALDH18A1	ENST00000485428.1|ENSG00000059573.8|OTTHUMG00000018815.2|OTTHUMT00000049556.1|ALDH18A1-204|ALDH18A1|726|processed_transcript|	processed_transcript	-0.266745	0.592831	-3.23485	0.00506127
ALDH2	ENST00000548536.1|ENSG00000111275.12|OTTHUMG00000169603.4|OTTHUMT00000405011.1|ALDH2-203|ALDH2|1760|nonsense_mediated_decay|	nonsense_mediated_decay	0.547366	0.031812	1.12303	0.000819144
ALDH3A1	ENST00000395555.7|ENSG00000108602.17|OTTHUMG00000059469.11|OTTHUMT00000132262.1|ALDH3A1-202|ALDH3A1|1495|protein_coding|	protein_coding	2.99491	2.09238e-05	2.22634	0.0476496
ALDH3A2	ENST00000176643.10|ENSG00000072210.18|OTTHUMG00000059471.7|OTTHUMT00000132268.1|ALDH3A2-201|ALDH3A2|3928|protein_coding|	protein_coding	-0.653877	0.514705	3.89593	1.60686e-08
ALDH3B2	ENST00000531248.1|ENSG00000132746.14|OTTHUMG00000167284.2|OTTHUMT00000394006.1|ALDH3B2-205|ALDH3B2|492|protein_coding|	protein_coding	0.647296	0.0931155	-1.95809	0.0192366
ALDH4A1	ENST00000290597.9|ENSG00000159423.16|OTTHUMG00000002443.6|OTTHUMT00000006955.2|ALDH4A1-201|ALDH4A1|2124|protein_coding|	protein_coding	1.30692	0.0790563	2.19216	0.0211666
ALDH7A1	ENST00000458249.6|ENSG00000164904.17|OTTHUMG00000128942.26|OTTHUMT00000489220.1|ALDH7A1-205|ALDH7A1|2037|nonsense_mediated_decay|	nonsense_mediated_decay	0.955559	0.000241398	-1.19277	0.0186159
ALDH7A1	ENST00000637782.1|ENSG00000164904.17|OTTHUMG00000128942.26|OTTHUMT00000489213.2|ALDH7A1-234|ALDH7A1|1773|protein_coding|	protein_coding	2.08951	2.44317e-18	0.9041	0.00783156
ALDH7A1	ENST00000637964.1|ENSG00000164904.17|OTTHUMG00000128942.26|OTTHUMT00000489180.1|ALDH7A1-235|ALDH7A1|1065|protein_coding|	protein_coding	1.16442	0.123134	2.31349	0.0150039
ALDH7A1	ENST00000636743.1|ENSG00000164904.17|OTTHUMG00000128942.26|OTTHUMT00000372272.5|ALDH7A1-224|ALDH7A1|2332|protein_coding|	protein_coding	0.529071	0.523082	2.46824	0.0110735
ALDOA	ENST00000564595.6|ENSG00000149925.17|OTTHUMG00000132107.7|OTTHUMT00000435377.2|ALDOA-213|ALDOA|1663|protein_coding|	protein_coding	1.15952	2.63728e-18	-0.438646	0.0373733
ALDOA	ENST00000566012.1|ENSG00000149925.17|OTTHUMG00000132107.7|OTTHUMT00000435375.1|ALDOA-216|ALDOA|553|processed_transcript|	processed_transcript	1.84329	0.0458708	3.82586	0.000164928
ALG13	ENST00000623189.1|ENSG00000101901.11|OTTHUMG00000022209.16|OTTHUMT00000479390.1|ALG13-230|ALG13|458|protein_coding|	protein_coding	0.443216	0.233267	-1.84479	0.0238979
ALG1L	ENST00000340333.7|ENSG00000189366.9|OTTHUMG00000159588.1|OTTHUMT00000356347.1|ALG1L-201|ALG1L|805|protein_coding|	protein_coding	0.139998	0.786147	1.14996	0.0316622
ALG3	ENST00000423996.5|ENSG00000214160.9|OTTHUMG00000156823.3|OTTHUMT00000346039.1|ALG3-204|ALG3|904|nonsense_mediated_decay|	nonsense_mediated_decay	0.659689	0.213038	1.58345	0.0124605
ALOXE3	ENST00000380149.5|ENSG00000179148.9|OTTHUMG00000108179.2|OTTHUMT00000226983.1|ALOXE3-202|ALOXE3|3362|protein_coding|	protein_coding	1.82605	3.53987e-05	1.69913	0.00609684
ALPK1	ENST00000177648.13|ENSG00000073331.17|OTTHUMG00000132911.2|OTTHUMT00000256421.2|ALPK1-201|ALPK1|4537|protein_coding|	protein_coding	2.26391	1.92634e-07	1.60613	0.0129048
AMBRA1	ENST00000526545.5|ENSG00000110497.14|OTTHUMG00000166500.5|OTTHUMT00000390286.1|AMBRA1-204|AMBRA1|837|protein_coding|	protein_coding	0.160531	0.842282	1.97034	0.00482036
AMD1	ENST00000368877.9|ENSG00000123505.15|OTTHUMG00000015369.5|OTTHUMT00000476405.1|AMD1-202|AMD1|1605|protein_coding|	protein_coding	2.81471	7.28198e-11	-3.50099	0.0381863
AMFR	ENST00000563285.1|ENSG00000159461.14|OTTHUMG00000133239.5|OTTHUMT00000434695.1|AMFR-203|AMFR|486|retained_intron|	retained_intron	-0.180726	0.564044	1.0855	0.000961428
AMIGO2	ENST00000266581.4|ENSG00000139211.6|OTTHUMG00000169616.1|OTTHUMT00000405075.1|AMIGO2-201|AMIGO2|3763|protein_coding|	protein_coding	0.138817	0.728399	1.24341	0.00113281
AMT	ENST00000637682.1|ENSG00000145020.15|OTTHUMG00000156847.12|OTTHUMT00000489272.2|AMT-250|AMT|1823|protein_coding|	protein_coding	-1.34638	0.0141118	-2.19435	0.00816183
AMZ2	ENST00000579724.5|ENSG00000196704.11|OTTHUMG00000179802.3|OTTHUMT00000448295.2|AMZ2-208|AMZ2|722|protein_coding|	protein_coding	-0.272255	0.385962	-2.11483	0.000106977
ANAPC11	ENST00000612413.4|ENSG00000141552.17|OTTHUMG00000177982.5|-|ANAPC11-223|ANAPC11|964|protein_coding|	protein_coding	0.13697	0.8264	1.32052	0.0299263
ANAPC15	ENST00000543015.1|ENSG00000110200.8|OTTHUMG00000167865.2|OTTHUMT00000396693.1|ANAPC15-212|ANAPC15|500|processed_transcript|	processed_transcript	0.194885	0.67667	-2.43229	0.0189479
ANAPC5	ENST00000541887.5|ENSG00000089053.12|OTTHUMG00000169157.3|OTTHUMT00000402581.1|ANAPC5-218|ANAPC5|2400|protein_coding|	protein_coding	-0.188117	0.790294	1.65926	0.0206462
ANGPTL5	ENST00000534527.1|ENSG00000187151.7|OTTHUMG00000167318.2|OTTHUMT00000394139.2|ANGPTL5-202|ANGPTL5|601|protein_coding|	protein_coding	-1.44132	0.000217964	0.812163	0.0375498
ANKDD1A	ENST00000395720.2|ENSG00000166839.16|OTTHUMG00000133051.8|-|ANKDD1A-202|ANKDD1A|1518|protein_coding|	protein_coding	-0.934724	0.155253	1.99597	0.00263206
ANKHD1	ENST00000360839.6|ENSG00000131503.20|OTTHUMG00000161610.3|OTTHUMT00000251672.1|ANKHD1-203|ANKHD1|8221|protein_coding|	protein_coding	-3.05368	0.00976187	2.76157	0.00308108
ANKMY1	ENST00000361678.8|ENSG00000144504.15|OTTHUMG00000133355.9|OTTHUMT00000257188.1|ANKMY1-202|ANKMY1|2499|protein_coding|	protein_coding	0.377657	0.537663	1.35991	0.0420342
ANKRD11	ENST00000330736.9|ENSG00000167522.14|OTTHUMG00000175548.10|OTTHUMT00000430639.2|ANKRD11-202|ANKRD11|8342|nonsense_mediated_decay|	nonsense_mediated_decay	1.04063	0.229777	2.26853	0.0473175
ANKRD11	ENST00000562194.1|ENSG00000167522.14|OTTHUMG00000175548.10|OTTHUMT00000430509.1|ANKRD11-205|ANKRD11|618|protein_coding|	protein_coding	-0.602523	0.113035	1.07302	0.0127978
ANKRD13A	ENST00000553246.1|ENSG00000076513.16|OTTHUMG00000169314.5|OTTHUMT00000403437.1|ANKRD13A-209|ANKRD13A|762|retained_intron|	retained_intron	0.932119	0.166546	3.01109	7.35978e-05
ANKRD13C	ENST00000262346.6|ENSG00000118454.12|OTTHUMG00000009343.2|OTTHUMT00000025904.1|ANKRD13C-201|ANKRD13C|3327|protein_coding|	protein_coding	1.54281	2.39861e-06	1.20463	0.0125637
ANKRD46	ENST00000358990.3|ENSG00000186106.11|OTTHUMG00000164724.3|OTTHUMT00000379904.2|ANKRD46-202|ANKRD46|661|protein_coding|	protein_coding	0.510912	0.284346	1.53998	0.00218486
ANO1	ENST00000525494.1|ENSG00000131620.17|OTTHUMG00000167204.2|OTTHUMT00000393691.1|ANO1-203|ANO1|1029|processed_transcript|	processed_transcript	-0.874049	0.0597674	1.33849	0.00712767
ANP32E	ENST00000436748.6|ENSG00000143401.14|OTTHUMG00000012547.5|OTTHUMT00000387925.1|ANP32E-203|ANP32E|1339|protein_coding|	protein_coding	1.11672	0.00186283	-2.06303	0.0308499
AOX1	ENST00000454629.1|ENSG00000138356.13|OTTHUMG00000154536.5|OTTHUMT00000335847.3|AOX1-204|AOX1|581|protein_coding|	protein_coding	0.43033	0.545346	1.86621	0.0188948
AP1M1	ENST00000591966.1|ENSG00000072958.8|OTTHUMG00000182323.4|OTTHUMT00000460503.1|AP1M1-214|AP1M1|542|retained_intron|	retained_intron	0.252099	0.742487	2.8734	2.19085e-05
AP1M2	ENST00000591240.5|ENSG00000129354.11|OTTHUMG00000180584.2|OTTHUMT00000452037.2|AP1M2-208|AP1M2|736|protein_coding|	protein_coding	-0.375101	0.672609	2.58684	0.000272093
AP2A2	ENST00000524952.2|ENSG00000183020.13|OTTHUMG00000165627.7|OTTHUMT00000385569.2|AP2A2-204|AP2A2|490|retained_intron|	retained_intron	-0.852679	0.126645	1.74317	0.000361161
AP2S1	ENST00000599990.5|ENSG00000042753.11|OTTHUMG00000183437.2|OTTHUMT00000466641.1|AP2S1-207|AP2S1|829|protein_coding|	protein_coding	1.52531	0.00748862	2.97993	2.09834e-05
AP3D1	ENST00000345016.9|ENSG00000065000.15|OTTHUMG00000180354.4|OTTHUMT00000450912.2|AP3D1-201|AP3D1|4870|protein_coding|	protein_coding	0.96239	0.00597185	1.14354	0.0233196
AP4M1	ENST00000446007.5|ENSG00000221838.9|OTTHUMG00000154722.107|OTTHUMT00000338347.2|AP4M1-211|AP4M1|960|nonsense_mediated_decay|	nonsense_mediated_decay	-0.13021	0.769335	-1.92555	0.0246817
APBB2	ENST00000510925.5|ENSG00000163697.16|OTTHUMG00000160416.11|OTTHUMT00000362070.2|APBB2-220|APBB2|701|nonsense_mediated_decay|	nonsense_mediated_decay	0.392905	0.574104	3.01676	7.81014e-07
APEX1	ENST00000557365.1|ENSG00000100823.11|OTTHUMG00000029544.6|OTTHUMT00000411070.1|APEX1-219|APEX1|831|processed_transcript|	processed_transcript	1.09688	0.161913	3.01212	0.000125282
APEX1	ENST00000557054.1|ENSG00000100823.11|OTTHUMG00000029544.6|OTTHUMT00000411068.2|APEX1-214|APEX1|888|protein_coding|	protein_coding	0.140589	0.813818	-2.68596	0.0420718
APLNR	ENST00000257254.3|ENSG00000134817.10|OTTHUMG00000167021.2|OTTHUMT00000392448.1|APLNR-201|APLNR|1726|nonsense_mediated_decay|	nonsense_mediated_decay	-0.247409	0.734146	1.49108	0.0244306
APMAP	ENST00000451442.5|ENSG00000101474.11|OTTHUMG00000032107.2|OTTHUMT00000256888.1|APMAP-202|APMAP|2117|protein_coding|	protein_coding	-1.18681	5.93444e-11	-0.596309	0.018138
APOBR	ENST00000564831.5|ENSG00000184730.10|OTTHUMG00000172705.1|OTTHUMT00000420020.1|APOBR-202|APOBR|3792|protein_coding|	protein_coding	1.228	0.207671	3.42489	0.00112085
APOC1	ENST00000589781.1|ENSG00000130208.9|OTTHUMG00000180844.2|OTTHUMT00000453249.1|APOC1-205|APOC1|273|protein_coding|	protein_coding	-2.42906	1.36102e-09	-0.983217	0.0189359
APOD	ENST00000458447.5|ENSG00000189058.8|OTTHUMG00000155854.2|OTTHUMT00000342006.1|APOD-204|APOD|950|nonsense_mediated_decay|	nonsense_mediated_decay	-1.99037	1.72356e-06	1.07599	0.0207792
APOL2	ENST00000451256.6|ENSG00000128335.13|OTTHUMG00000150634.5|OTTHUMT00000394590.2|APOL2-203|APOL2|1421|protein_coding|	protein_coding	2.76057	4.30808e-11	1.39096	0.0335855
APOL3	ENST00000424878.3|ENSG00000128284.19|OTTHUMG00000150632.19|-|APOL3-207|APOL3|1240|protein_coding|	protein_coding	0.746926	0.369021	3.4096	4.07778e-06
APTX	ENST00000379813.7|ENSG00000137074.18|OTTHUMG00000019759.6|-|APTX-203|APTX|1121|protein_coding|	protein_coding	1.48123	0.0185155	2.58791	0.000372604
APTX	ENST00000468275.5|ENSG00000137074.18|OTTHUMG00000019759.6|OTTHUMT00000355323.1|APTX-215|APTX|1455|protein_coding|	protein_coding	0.558312	0.295865	2.65979	3.16569e-05
ARAF	ENST00000489496.1|ENSG00000078061.12|OTTHUMG00000021446.2|OTTHUMT00000056421.1|ARAF-206|ARAF|472|processed_transcript|	processed_transcript	-0.514978	0.378992	-1.93702	0.0376205
ARAP1	ENST00000426523.5|ENSG00000186635.14|OTTHUMG00000157102.4|OTTHUMT00000347432.1|ARAP1-205|ARAP1|4066|protein_coding|	protein_coding	0.858017	0.465602	4.23622	6.0149e-05
ARAP1	ENST00000546293.1|ENSG00000186635.14|OTTHUMG00000157102.4|OTTHUMT00000397229.1|ARAP1-221|ARAP1|702|retained_intron|	retained_intron	0.345687	0.598137	1.50585	0.041835
ARFGAP1	ENST00000549047.5|ENSG00000101199.12|OTTHUMG00000032965.7|OTTHUMT00000408555.2|ARFGAP1-221|ARFGAP1|1040|protein_coding|	protein_coding	0.0465988	0.952575	-2.22639	0.0262056
ARFGAP1	ENST00000468975.6|ENSG00000101199.12|OTTHUMG00000032965.7|OTTHUMT00000378037.2|ARFGAP1-205|ARFGAP1|2640|processed_transcript|	processed_transcript	-1.01767	0.139608	1.46066	0.0361153
ARFIP2	ENST00000445086.6|ENSG00000132254.12|OTTHUMG00000133406.6|OTTHUMT00000474170.1|ARFIP2-204|ARFIP2|1300|protein_coding|	protein_coding	1.12471	0.00270951	1.38666	0.00701454
ARFIP2	ENST00000525235.1|ENSG00000132254.12|OTTHUMG00000133406.6|OTTHUMT00000384235.1|ARFIP2-205|ARFIP2|852|protein_coding|	protein_coding	0.6203	0.0715205	1.12488	0.00737962
ARHGAP22	ENST00000374172.5|ENSG00000128805.14|OTTHUMG00000018176.5|OTTHUMT00000047944.2|ARHGAP22-203|ARHGAP22|2380|protein_coding|	protein_coding	1.23258	0.0643063	1.86257	0.023511
ARHGAP23	ENST00000620325.1|ENSG00000275832.4|OTTHUMG00000188547.3|OTTHUMT00000477598.1|ARHGAP23-219|ARHGAP23|438|nonsense_mediated_decay|	nonsense_mediated_decay	0.800117	0.179197	2.6482	2.96029e-06
ARHGAP27	ENST00000581991.1|ENSG00000159314.11|OTTHUMG00000166982.6|OTTHUMT00000444655.1|ARHGAP27-217|ARHGAP27|466|retained_intron|	retained_intron	0.356021	0.577243	2.54414	1.46811e-05
ARHGAP28	ENST00000419673.6|ENSG00000088756.12|OTTHUMG00000167698.10|OTTHUMT00000395706.1|ARHGAP28-204|ARHGAP28|5492|protein_coding|	protein_coding	-0.91462	0.362663	1.77545	0.049894
ARHGDIA	ENST00000579121.5|ENSG00000141522.11|OTTHUMG00000178352.3|OTTHUMT00000441939.2|ARHGDIA-205|ARHGDIA|637|protein_coding|	protein_coding	0.18974	0.708289	-1.7483	0.0457292
ARHGEF10	ENST00000521927.1|ENSG00000104728.15|OTTHUMG00000163626.2|OTTHUMT00000375058.1|ARHGEF10-209|ARHGEF10|814|processed_transcript|	processed_transcript	-0.195599	0.826012	2.8231	2.9586e-05
ARHGEF11	ENST00000492592.1|ENSG00000132694.18|OTTHUMG00000041292.1|OTTHUMT00000098936.1|ARHGEF11-207|ARHGEF11|864|processed_transcript|	processed_transcript	-0.680128	0.250766	2.19323	2.3383e-05
ARHGEF18	ENST00000595600.1|ENSG00000104880.17|OTTHUMG00000177342.4|OTTHUMT00000458962.1|ARHGEF18-204|ARHGEF18|560|retained_intron|	retained_intron	0.144453	0.801314	1.35495	0.0117623
ARHGEF2	ENST00000313667.8|ENSG00000116584.17|OTTHUMG00000017464.8|OTTHUMT00000046205.2|ARHGEF2-201|ARHGEF2|2958|protein_coding|	protein_coding	1.03563	0.16956	2.06764	0.0491883
ARHGEF26	ENST00000465817.1|ENSG00000114790.12|OTTHUMG00000159098.3|OTTHUMT00000353290.2|ARHGEF26-203|ARHGEF26|2353|protein_coding|	protein_coding	-0.331597	0.704711	2.04157	0.0149121
ARHGEF4	ENST00000355771.7|ENSG00000136002.18|OTTHUMG00000191895.1|OTTHUMT00000388910.1|ARHGEF4-202|ARHGEF4|1872|protein_coding|	protein_coding	0.851067	0.162515	2.25133	0.00406176
ARHGEF4	ENST00000392953.8|ENSG00000136002.18|OTTHUMG00000191895.1|OTTHUMT00000331306.4|ARHGEF4-203|ARHGEF4|3800|protein_coding|	protein_coding	-0.956779	0.165272	1.97115	0.00128792
ARHGEF4	ENST00000528247.1|ENSG00000136002.18|OTTHUMG00000191895.1|OTTHUMT00000388912.1|ARHGEF4-215|ARHGEF4|662|processed_transcript|	processed_transcript	-0.574872	0.282949	1.28042	0.0225772
ARHGEF40	ENST00000553709.5|ENSG00000165801.9|OTTHUMG00000171359.2|OTTHUMT00000413125.1|ARHGEF40-202|ARHGEF40|5204|nonsense_mediated_decay|	nonsense_mediated_decay	0.496379	0.585651	3.34155	4.11093e-05
ARHGEF5	ENST00000471847.2|ENSG00000050327.14|OTTHUMG00000158004.3|OTTHUMT00000467755.2|ARHGEF5-202|ARHGEF5|1862|protein_coding|	protein_coding	-0.417127	0.642703	1.78565	0.0321277
ARID1A	ENST00000532781.1|ENSG00000117713.18|OTTHUMG00000004004.11|OTTHUMT00000393247.1|ARID1A-208|ARID1A|2583|nonsense_mediated_decay|	nonsense_mediated_decay	0.224002	0.609921	1.04077	0.0439665
ARID1B	ENST00000637741.1|ENSG00000049618.22|OTTHUMG00000015890.10|OTTHUMT00000489351.1|ARID1B-229|ARID1B|3915|processed_transcript|	processed_transcript	-0.0941149	0.87019	1.28034	0.030355
ARL6IP1	ENST00000562234.2|ENSG00000170540.14|OTTHUMG00000131367.5|OTTHUMT00000435786.3|ARL6IP1-203|ARL6IP1|391|protein_coding|	protein_coding	0.717574	0.427771	2.77979	0.00278338
ARL6IP4	ENST00000456762.2|ENSG00000182196.13|OTTHUMG00000168779.4|OTTHUMT00000401047.1|ARL6IP4-212|ARL6IP4|796|protein_coding|	protein_coding	-0.408925	0.640088	-3.42608	0.00555069
ARL6IP5	ENST00000470936.1|ENSG00000144746.6|OTTHUMG00000158773.1|OTTHUMT00000352136.1|ARL6IP5-202|ARL6IP5|580|retained_intron|	retained_intron	-0.116114	0.902872	2.16098	0.0230428
ARMC1	ENST00000528721.5|ENSG00000104442.9|OTTHUMG00000164374.4|OTTHUMT00000378481.2|ARMC1-206|ARMC1|887|nonsense_mediated_decay|	nonsense_mediated_decay	0.916327	0.151266	2.21095	0.0011308
ARNTL	ENST00000389707.8|ENSG00000133794.17|OTTHUMG00000150623.8|OTTHUMT00000319170.1|ARNTL-201|ARNTL|2776|protein_coding|	protein_coding	0.065782	0.921965	1.79363	0.0171666
ARPC2	ENST00000462034.1|ENSG00000163466.15|OTTHUMG00000133618.4|OTTHUMT00000259049.1|ARPC2-207|ARPC2|304|processed_transcript|	processed_transcript	-0.240317	0.594151	-1.88959	0.00948938
ARPC3	ENST00000426440.5|ENSG00000111229.15|OTTHUMG00000134333.4|OTTHUMT00000259493.3|ARPC3-202|ARPC3|349|protein_coding|	protein_coding	1.59986	0.000106449	-2.61955	0.0300624
ARRB2	ENST00000574954.5|ENSG00000141480.17|OTTHUMG00000090759.5|OTTHUMT00000439554.2|ARRB2-216|ARRB2|1348|protein_coding|	protein_coding	2.29859	1.52266e-05	2.26842	0.00128988
ARRB2	ENST00000269260.6|ENSG00000141480.17|OTTHUMG00000090759.5|OTTHUMT00000439552.1|ARRB2-201|ARRB2|1895|protein_coding|	protein_coding	1.02259	0.284904	3.09609	0.000741976
ARSG	ENST00000452479.6|ENSG00000141337.12|OTTHUMG00000179810.6|OTTHUMT00000448370.1|ARSG-202|ARSG|1733|protein_coding|	protein_coding	-1.86061	0.00339593	1.85556	0.000982212
ARSI	ENST00000515301.2|ENSG00000183876.8|OTTHUMG00000163479.3|OTTHUMT00000373682.3|ARSI-203|ARSI|1429|protein_coding|	protein_coding	0.753435	0.0867239	1.59248	0.00182477
ARVCF	ENST00000406259.1|ENSG00000099889.13|OTTHUMG00000030426.9|OTTHUMT00000319752.1|ARVCF-203|ARVCF|2871|protein_coding|	protein_coding	-0.23412	0.758295	1.76083	0.0470196
ASAH1	ENST00000637790.1|ENSG00000104763.18|OTTHUMG00000096997.19|OTTHUMT00000214077.3|ASAH1-258|ASAH1|3042|protein_coding|	protein_coding	-1.00421	0.00533661	1.08243	0.00250937
ASAP3	ENST00000618240.4|ENSG00000088280.18|OTTHUMG00000003234.7|-|ASAP3-212|ASAP3|2226|protein_coding|	protein_coding	-0.978876	0.196944	-2.4843	0.0421209
ASB3	ENST00000482829.5|ENSG00000115239.21|OTTHUMG00000184778.1|OTTHUMT00000326488.1|ASB3-211|ASB3|1910|processed_transcript|	processed_transcript	0.130202	0.86561	-2.11461	0.0393416
ASB8	ENST00000629941.1|ENSG00000177981.10|OTTHUMG00000167834.3|-|ASB8-218|ASB8|278|protein_coding|	protein_coding	0.717378	0.0361416	-1.75955	0.0121584
ASCC2	ENST00000487486.5|ENSG00000100325.14|OTTHUMG00000067658.6|OTTHUMT00000322134.1|ASCC2-219|ASCC2|1596|retained_intron|	retained_intron	-0.0490748	0.939886	1.36397	0.0324709
ASH1L	ENST00000492987.2|ENSG00000116539.12|OTTHUMG00000014011.3|OTTHUMT00000039403.2|ASH1L-205|ASH1L|784|nonsense_mediated_decay|	nonsense_mediated_decay	-1.342	8.28927e-06	0.83727	0.00451739
ASH2L	ENST00000517496.5|ENSG00000129691.15|OTTHUMG00000164016.7|OTTHUMT00000376755.1|ASH2L-203|ASH2L|2194|nonsense_mediated_decay|	nonsense_mediated_decay	1.43055	0.00682833	1.77071	0.0142165
ASPH	ENST00000519234.5|ENSG00000198363.17|OTTHUMG00000164375.12|OTTHUMT00000378573.1|ASPH-214|ASPH|2874|protein_coding|	protein_coding	0.601531	0.511324	2.28211	0.0207792
ASPSCR1	ENST00000583744.1|ENSG00000169696.15|OTTHUMG00000178438.5|OTTHUMT00000441986.2|ASPSCR1-218|ASPSCR1|539|protein_coding|	protein_coding	-0.011357	0.974838	-1.14756	0.0433118
ASPSCR1	ENST00000583503.5|ENSG00000169696.15|OTTHUMG00000178438.5|OTTHUMT00000441976.1|ASPSCR1-216|ASPSCR1|641|nonsense_mediated_decay|	nonsense_mediated_decay	-0.131376	0.807231	1.2969	0.00669095
ATAD3B	ENST00000378736.3|ENSG00000160072.19|OTTHUMG00000000577.5|OTTHUMT00000472704.1|ATAD3B-202|ATAD3B|414|processed_transcript|	processed_transcript	0.931021	0.0208426	1.15553	0.033993
ATF6B	ENST00000494022.1|ENSG00000213676.10|OTTHUMG00000031296.4|OTTHUMT00000357024.1|ATF6B-216|ATF6B|320|processed_transcript|	processed_transcript	0.0147277	0.980732	-2.72831	0.0128037
ATG10	ENST00000513634.1|ENSG00000152348.15|OTTHUMG00000119041.6|OTTHUMT00000369559.1|ATG10-208|ATG10|618|protein_coding|	protein_coding	-0.0320675	0.915575	-1.1588	0.00834372
ATOH8	ENST00000469442.5|ENSG00000168874.12|OTTHUMG00000130178.2|OTTHUMT00000329841.1|ATOH8-203|ATOH8|1893|processed_transcript|	processed_transcript	-1.87157	4.83767e-05	0.968516	0.0261755
ATP11A	ENST00000375645.7|ENSG00000068650.18|OTTHUMG00000017371.10|-|ATP11A-202|ATP11A|8795|protein_coding|	protein_coding	-0.317986	0.721974	-2.93274	0.0403756
ATP11A	ENST00000471555.5|ENSG00000068650.18|OTTHUMG00000017371.10|OTTHUMT00000355110.1|ATP11A-210|ATP11A|5786|nonsense_mediated_decay|	nonsense_mediated_decay	-0.472412	0.269339	1.26428	0.00650753
ATP13A2	ENST00000503552.1|ENSG00000159363.17|OTTHUMG00000002293.4|OTTHUMT00000368170.2|ATP13A2-208|ATP13A2|774|protein_coding|	protein_coding	-0.567562	0.246409	1.53821	0.000395966
ATP13A4	ENST00000450950.6|ENSG00000127249.14|OTTHUMG00000074067.6|OTTHUMT00000157245.3|ATP13A4-207|ATP13A4|3658|nonsense_mediated_decay|	nonsense_mediated_decay	1.76421	0.00136842	2.10905	0.00416069
ATP1A1-AS1	ENST00000608511.5|ENSG00000203865.9|OTTHUMG00000012111.4|OTTHUMT00000473009.1|ATP1A1-AS1-204|ATP1A1-AS1|1180|processed_transcript|	processed_transcript	-1.06397	5.60942e-16	0.389815	0.00225537
ATP2A3	ENST00000352011.7|ENSG00000074370.17|OTTHUMG00000177674.2|OTTHUMT00000438401.1|ATP2A3-202|ATP2A3|3274|protein_coding|	protein_coding	-0.462849	0.666423	2.22145	0.0251464
ATP5B	ENST00000551570.5|ENSG00000110955.8|OTTHUMG00000170291.5|OTTHUMT00000408390.2|ATP5B-209|ATP5B|399|protein_coding|	protein_coding	0.949995	5.1102e-06	-1.18783	0.00969373
ATP5G1	ENST00000515060.1|ENSG00000159199.13|OTTHUMG00000160520.4|OTTHUMT00000361090.1|ATP5G1-210|ATP5G1|433|processed_transcript|	processed_transcript	0.269	0.59351	1.87884	0.00214274
ATP5G2	ENST00000549164.5|ENSG00000135390.17|OTTHUMG00000133442.4|OTTHUMT00000407403.1|ATP5G2-204|ATP5G2|745|protein_coding|	protein_coding	0.833926	0.135281	1.72512	0.00707657
ATP5L	ENST00000524422.1|ENSG00000167283.7|OTTHUMG00000166336.3|OTTHUMT00000389224.1|ATP5L-202|ATP5L|720|protein_coding|	protein_coding	-0.578631	0.560927	2.0006	0.019011
ATP5O	ENST00000418933.1|ENSG00000241837.6|OTTHUMG00000065186.10|OTTHUMT00000315812.1|ATP5O-203|ATP5O|415|protein_coding|	protein_coding	-0.224735	0.594648	1.21791	0.003501
ATP5O	ENST00000431254.5|ENSG00000241837.6|OTTHUMG00000065186.10|OTTHUMT00000139909.4|ATP5O-205|ATP5O|583|nonsense_mediated_decay|	nonsense_mediated_decay	0.877078	0.00710657	1.22449	0.00589984
ATP6V0A1	ENST00000587299.1|ENSG00000033627.16|OTTHUMG00000180238.2|OTTHUMT00000450383.1|ATP6V0A1-211|ATP6V0A1|1000|processed_transcript|	processed_transcript	-0.0349176	0.962481	-2.63182	0.00712767
ATP6V1H	ENST00000518072.1|ENSG00000047249.17|OTTHUMG00000164231.7|OTTHUMT00000377989.1|ATP6V1H-204|ATP6V1H|494|retained_intron|	retained_intron	0.141078	0.842043	1.74769	0.0069352
ATP8B2	ENST00000505882.1|ENSG00000143515.16|OTTHUMG00000035979.5|OTTHUMT00000359979.1|ATP8B2-205|ATP8B2|895|retained_intron|	retained_intron	0.18299	0.770624	1.60739	0.0363221
ATXN2L	ENST00000570284.1|ENSG00000168488.18|OTTHUMG00000097038.6|OTTHUMT00000432651.1|ATXN2L-226|ATXN2L|701|processed_transcript|	processed_transcript	0.946458	0.140779	3.17285	2.44372e-07
ATXN2L	ENST00000564304.5|ENSG00000168488.18|OTTHUMG00000097038.6|OTTHUMT00000432048.1|ATXN2L-215|ATXN2L|3514|protein_coding|	protein_coding	0.103029	0.833388	1.1528	0.0282605
ATXN2L	ENST00000565971.5|ENSG00000168488.18|OTTHUMG00000097038.6|OTTHUMT00000432051.1|ATXN2L-218|ATXN2L|3264|nonsense_mediated_decay|	nonsense_mediated_decay	1.82226	0.0329564	2.49651	0.0181074
ATXN3	ENST00000526245.1|ENSG00000066427.21|OTTHUMG00000162212.10|OTTHUMT00000388064.1|ATXN3-213|ATXN3|352|processed_transcript|	processed_transcript	-0.920305	0.000935608	1.00583	0.000165841
B4GALT2	ENST00000372324.5|ENSG00000117411.16|OTTHUMG00000008296.1|-|B4GALT2-203|B4GALT2|2203|protein_coding|	protein_coding	0.0315817	0.96949	2.05111	0.00537019
BABAM2	ENST00000342045.6|ENSG00000158019.20|OTTHUMG00000097831.4|OTTHUMT00000215114.1|BABAM2-201|BABAM2|1681|protein_coding|	protein_coding	0.287495	0.741666	2.1218	0.0149087
BACE1	ENST00000504995.5|ENSG00000186318.16|OTTHUMG00000160636.11|OTTHUMT00000361605.6|BACE1-205|BACE1|611|protein_coding|	protein_coding	0.394954	0.562694	1.71346	0.0159215
BACE2	ENST00000463674.5|ENSG00000182240.15|OTTHUMG00000086742.2|OTTHUMT00000195063.1|BACE2-204|BACE2|1013|processed_transcript|	processed_transcript	0.469817	0.623333	4.1566	5.05621e-08
BAIAP2-AS1	ENST00000573167.2|ENSG00000226137.5|OTTHUMG00000177697.3|OTTHUMT00000438545.2|BAIAP2-AS1-201|BAIAP2-AS1|4014|lincRNA|	lincRNA	-0.287337	0.525799	1.23017	0.0111031
BANF1	ENST00000528648.1|ENSG00000175334.7|OTTHUMG00000166749.2|OTTHUMT00000391347.1|BANF1-206|BANF1|362|processed_transcript|	processed_transcript	0.18191	0.790527	1.55365	0.0203986
BARD1	ENST00000617164.4|ENSG00000138376.10|OTTHUMG00000133016.4|-|BARD1-212|BARD1|5449|protein_coding|	protein_coding	0.182203	0.815873	-2.23513	0.0330769
BBC3	ENST00000439096.2|ENSG00000105327.17|OTTHUMG00000183489.2|OTTHUMT00000466874.1|BBC3-203|BBC3|1838|protein_coding|	protein_coding	-0.111994	0.865718	1.83897	0.00111807
BBIP1	ENST00000398289.2|ENSG00000214413.7|OTTHUMG00000019046.3|OTTHUMT00000050351.2|BBIP1-201|BBIP1|616|nonsense_mediated_decay|	nonsense_mediated_decay	1.07392	0.01066	-2.10971	0.00638981
BBS2	ENST00000564459.5|ENSG00000125124.11|OTTHUMG00000176943.9|OTTHUMT00000434949.2|BBS2-209|BBS2|641|protein_coding|	protein_coding	-1.03182	1.19798e-10	-0.440837	0.0493745
BBS5	ENST00000295240.7|ENSG00000163093.11|OTTHUMG00000132207.2|OTTHUMT00000255265.2|BBS5-201|BBS5|3475|protein_coding|	protein_coding	2.2842	2.34842e-07	2.23991	6.4927e-05
BCAM	ENST00000590196.1|ENSG00000187244.10|OTTHUMG00000180838.3|OTTHUMT00000453226.1|BCAM-208|BCAM|518|nonsense_mediated_decay|	nonsense_mediated_decay	-0.637682	0.454581	3.60076	3.3393e-09
BCAS3	ENST00000585979.5|ENSG00000141376.22|OTTHUMG00000180064.2|OTTHUMT00000449592.1|BCAS3-206|BCAS3|919|processed_transcript|	processed_transcript	-0.51272	0.407131	-2.10583	0.0194305
BCAS3	ENST00000586041.1|ENSG00000141376.22|OTTHUMG00000180064.2|OTTHUMT00000449589.1|BCAS3-207|BCAS3|542|processed_transcript|	processed_transcript	-0.600548	0.295993	-1.92638	0.0419826
BCKDK	ENST00000567530.5|ENSG00000103507.13|OTTHUMG00000047356.6|OTTHUMT00000433530.1|BCKDK-208|BCKDK|1796|nonsense_mediated_decay|	nonsense_mediated_decay	0.905331	0.0115557	1.04624	0.0446439
BCL2L12	ENST00000598306.2|ENSG00000126453.9|OTTHUMG00000183239.2|OTTHUMT00000465775.2|BCL2L12-206|BCL2L12|510|protein_coding|	protein_coding	0.914349	0.0896483	1.46464	0.0376531
BCL3	ENST00000444487.1|ENSG00000069399.14|OTTHUMG00000151517.3|OTTHUMT00000322980.2|BCL3-203|BCL3|923|protein_coding|	protein_coding	1.98878	0.00107443	2.0064	0.0186925
BCL6	ENST00000450123.6|ENSG00000113916.17|OTTHUMG00000156441.3|OTTHUMT00000344211.2|BCL6-206|BCL6|2003|protein_coding|	protein_coding	0.0984178	0.877567	1.55879	0.0147634
BCL6	ENST00000621333.4|ENSG00000113916.17|OTTHUMG00000156441.3|-|BCL6-211|BCL6|3399|protein_coding|	protein_coding	-0.311814	0.731129	-2.48454	0.048171
BCOR	ENST00000427012.1|ENSG00000183337.16|OTTHUMG00000024100.4|OTTHUMT00000060665.2|BCOR-209|BCOR|1969|protein_coding|	protein_coding	-0.633201	0.415866	1.93703	0.0327138
BDH1	ENST00000392378.6|ENSG00000161267.11|OTTHUMG00000155478.10|OTTHUMT00000340267.1|BDH1-202|BDH1|3455|protein_coding|	protein_coding	0.428278	0.690844	3.24296	0.000299612
BEX3	ENST00000361298.8|ENSG00000166681.13|OTTHUMG00000022099.1|OTTHUMT00000057710.1|BEX3-201|BEX3|921|protein_coding|	protein_coding	0.524054	0.564091	2.20965	0.0248581
BICDL2	ENST00000389347.4|ENSG00000162069.14|OTTHUMG00000177452.1|-|BICDL2-201|BICDL2|1811|protein_coding|	protein_coding	1.26137	0.000832277	1.69153	0.000590075
BID	ENST00000399774.7|ENSG00000015475.18|OTTHUMG00000150087.5|OTTHUMT00000316178.1|BID-205|BID|2167|protein_coding|	protein_coding	1.65576	0.0336241	3.15685	0.000524994
BIN3	ENST00000276416.10|ENSG00000147439.12|OTTHUMG00000163844.1|OTTHUMT00000375895.1|BIN3-201|BIN3|1835|protein_coding|	protein_coding	1.63015	0.0351972	2.35174	0.0177637
BLOC1S6	ENST00000563160.5|ENSG00000104164.10|OTTHUMG00000131477.4|OTTHUMT00000420262.1|BLOC1S6-204|BLOC1S6|581|processed_transcript|	processed_transcript	-0.353877	0.48597	-2.65452	0.00816454
BMI1	ENST00000416820.5|ENSG00000168283.13|OTTHUMG00000017807.3|OTTHUMT00000047183.2|BMI1-202|BMI1|406|protein_coding|	protein_coding	-0.206346	0.452206	-1.12103	0.0105239
BNIP3L	ENST00000520409.5|ENSG00000104765.15|OTTHUMG00000099433.3|OTTHUMT00000376516.1|BNIP3L-204|BNIP3L|739|protein_coding|	protein_coding	0.205835	0.805066	1.98302	0.0155624
BOLA2	ENST00000330978.3|ENSG00000183336.8|OTTHUMG00000176757.2|OTTHUMT00000433254.1|BOLA2-201|BOLA2|1012|protein_coding|	protein_coding	1.3197	0.0343258	1.93568	0.0177194
BOLA2B	ENST00000305321.4|ENSG00000169627.7|OTTHUMG00000176858.1|OTTHUMT00000434080.1|BOLA2B-201|BOLA2B|1012|protein_coding|	protein_coding	1.3197	0.0343258	1.93568	0.0177194
BPHL	ENST00000433912.5|ENSG00000137274.12|OTTHUMG00000014140.6|OTTHUMT00000346930.1|BPHL-207|BPHL|1063|nonsense_mediated_decay|	nonsense_mediated_decay	0.511181	0.424275	1.72024	0.0109896
BPTF	ENST00000577770.1|ENSG00000171634.16|OTTHUMG00000132254.4|OTTHUMT00000448092.1|BPTF-209|BPTF|475|processed_transcript|	processed_transcript	-0.13624	0.783387	1.06369	0.0252135
BRD2	ENST00000395287.5|ENSG00000204256.12|OTTHUMG00000031241.7|OTTHUMT00000276545.1|BRD2-203|BRD2|3467|protein_coding|	protein_coding	-0.574659	0.506607	2.09769	0.0116592
BRD2	ENST00000581002.1|ENSG00000204256.12|OTTHUMG00000031241.7|OTTHUMT00000442378.1|BRD2-216|BRD2|550|processed_transcript|	processed_transcript	0.312575	0.594974	2.41838	0.000322293
BRD3	ENST00000494743.1|ENSG00000169925.16|OTTHUMG00000021004.7|OTTHUMT00000318422.1|BRD3-206|BRD3|507|retained_intron|	retained_intron	0.518829	0.358402	1.54309	0.0358407
BRD8	ENST00000418329.5|ENSG00000112983.17|OTTHUMG00000129204.7|OTTHUMT00000318444.1|BRD8-205|BRD8|2912|protein_coding|	protein_coding	-0.96516	0.412734	2.70785	0.00898199
BRF2	ENST00000520601.5|ENSG00000104221.12|OTTHUMG00000164025.2|OTTHUMT00000376812.1|BRF2-202|BRF2|1192|protein_coding|	protein_coding	-0.329255	0.522104	1.38647	0.0134781
BSG	ENST00000573784.5|ENSG00000172270.18|OTTHUMG00000177718.16|OTTHUMT00000438636.3|BSG-208|BSG|559|protein_coding|	protein_coding	0.574322	0.626566	3.35641	0.000992072
BSG	ENST00000613627.4|ENSG00000172270.18|OTTHUMG00000177718.16|OTTHUMT00000474367.2|BSG-213|BSG|689|protein_coding|	protein_coding	0.33864	0.753773	2.12211	0.0492228
BTBD1	ENST00000379403.2|ENSG00000064726.9|OTTHUMG00000147364.4|OTTHUMT00000419503.1|BTBD1-202|BTBD1|1467|protein_coding|	protein_coding	-0.0457183	0.951501	-2.1364	0.0277725
BTBD6	ENST00000392554.7|ENSG00000184887.13|OTTHUMG00000029887.6|OTTHUMT00000074556.4|BTBD6-203|BTBD6|2176|protein_coding|	protein_coding	0.517506	0.55813	2.37629	0.00742653
BTD	ENST00000383778.5|ENSG00000169814.12|OTTHUMG00000129861.3|-|BTD-202|BTD|2261|protein_coding|	protein_coding	-0.55075	0.355484	-2.11348	0.0130466
BTG3	ENST00000496601.1|ENSG00000154640.14|OTTHUMG00000074501.4|OTTHUMT00000158199.1|BTG3-206|BTG3|378|processed_transcript|	processed_transcript	0.197259	0.653055	1.01051	0.0386704
BTN3A1	ENST00000476549.6|ENSG00000026950.16|OTTHUMG00000014449.5|OTTHUMT00000257284.2|BTN3A1-208|BTN3A1|1758|protein_coding|	protein_coding	1.2681	0.028445	1.56878	0.0418726
BTN3A2	ENST00000527417.5|ENSG00000186470.13|OTTHUMG00000014450.6|OTTHUMT00000388265.2|BTN3A2-208|BTN3A2|593|protein_coding|	protein_coding	-0.773664	0.24728	1.48584	0.0450467
BUD23	ENST00000464615.1|ENSG00000071462.11|OTTHUMG00000023306.4|OTTHUMT00000348047.1|BUD23-214|BUD23|458|processed_transcript|	processed_transcript	0.791154	0.0427349	1.08275	0.0373649
BUD31	ENST00000471813.1|ENSG00000106245.10|OTTHUMG00000154602.3|OTTHUMT00000336281.1|BUD31-207|BUD31|341|retained_intron|	retained_intron	-1.3566	0.00590773	-1.99975	0.0200359
BX284668.5	ENST00000457075.1|ENSG00000238142.1|OTTHUMG00000002204.1|OTTHUMT00000006258.1|BX284668.5-203|BX284668.5|346|lincRNA|	lincRNA	-1.09936	3.81281e-09	-0.516757	0.0377558
BZW1	ENST00000463310.1|ENSG00000082153.17|OTTHUMG00000154560.19|OTTHUMT00000335988.1|BZW1-211|BZW1|582|retained_intron|	retained_intron	1.01366	0.0117175	-2.60774	0.0170452
BZW1	ENST00000359893.4|ENSG00000082153.17|OTTHUMG00000154560.19|OTTHUMT00000335990.1|BZW1-201|BZW1|779|protein_coding|	protein_coding	1.13593	1.37003e-18	-0.66312	0.00118394
BZW2	ENST00000407633.1|ENSG00000136261.14|OTTHUMG00000130755.6|OTTHUMT00000326377.1|BZW2-203|BZW2|898|protein_coding|	protein_coding	-0.388375	0.683172	2.06497	0.0365815
BZW2	ENST00000446596.5|ENSG00000136261.14|OTTHUMG00000130755.6|OTTHUMT00000326374.2|BZW2-211|BZW2|859|protein_coding|	protein_coding	-1.27996	0.00219986	-1.48483	0.0212583
C11orf71	ENST00000325636.8|ENSG00000180425.11|OTTHUMG00000168247.3|OTTHUMT00000398959.3|C11orf71-201|C11orf71|652|protein_coding|	protein_coding	-0.253875	0.760056	1.9206	0.014837
C11orf74	ENST00000446510.6|ENSG00000166352.15|OTTHUMG00000166397.3|-|C11orf74-203|C11orf74|1062|protein_coding|	protein_coding	0.511436	0.458046	2.16687	0.00225537
C12orf10	ENST00000549488.5|ENSG00000139637.13|OTTHUMG00000170030.2|OTTHUMT00000406912.1|C12orf10-207|C12orf10|840|protein_coding|	protein_coding	0.151104	0.635592	-1.80626	0.00137951
C12orf29	ENST00000548757.6|ENSG00000133641.17|OTTHUMG00000169870.3|OTTHUMT00000406333.2|C12orf29-205|C12orf29|765|processed_transcript|	processed_transcript	2.91157	4.50041e-05	-3.42776	0.0423115
C12orf43	ENST00000539736.5|ENSG00000157895.11|OTTHUMG00000169150.6|OTTHUMT00000402522.1|C12orf43-208|C12orf43|1033|protein_coding|	protein_coding	0.790638	0.0293648	1.13664	0.0219599
C14orf159	ENST00000412671.6|ENSG00000133943.20|OTTHUMG00000164980.6|-|C14orf159-203|C14orf159|2591|protein_coding|	protein_coding	0.0761472	0.952046	2.79361	0.0049447
C14orf80	ENST00000354560.10|ENSG00000185347.17|OTTHUMG00000170426.4|OTTHUMT00000074610.3|C14orf80-203|C14orf80|1553|protein_coding|	protein_coding	1.49467	0.0152414	1.83588	0.043232
C14orf80	ENST00000392527.5|ENSG00000185347.17|OTTHUMG00000170426.4|OTTHUMT00000074611.2|C14orf80-206|C14orf80|1476|protein_coding|	protein_coding	-0.587072	0.458443	2.45161	0.000228539
C14orf93	ENST00000397379.7|ENSG00000100802.14|OTTHUMG00000028712.12|OTTHUMT00000071692.2|C14orf93-205|C14orf93|1949|protein_coding|	protein_coding	-0.14853	0.864956	2.00837	0.00512074
C17orf58	ENST00000580729.2|ENSG00000186665.9|OTTHUMG00000179782.2|OTTHUMT00000448104.2|C17orf58-204|C17orf58|2065|protein_coding|	protein_coding	-0.624404	0.042589	-1.09267	0.0381863
C19orf44	ENST00000221671.7|ENSG00000105072.8|OTTHUMG00000182439.2|OTTHUMT00000461218.1|C19orf44-201|C19orf44|3427|protein_coding|	protein_coding	0.0840237	0.910194	1.66757	0.0151389
C19orf48	ENST00000593287.5|ENSG00000167747.14|OTTHUMG00000182875.4|OTTHUMT00000464128.2|C19orf48-203|C19orf48|578|processed_transcript|	processed_transcript	1.37265	3.61794e-06	-3.6205	1.91369e-07
C19orf48	ENST00000596655.1|ENSG00000167747.14|OTTHUMG00000182875.4|OTTHUMT00000464109.1|C19orf48-207|C19orf48|1639|retained_intron|	retained_intron	1.60924	0.0318722	4.80684	1.91791e-11
C19orf53	ENST00000588841.1|ENSG00000104979.8|OTTHUMG00000180914.1|OTTHUMT00000453624.1|C19orf53-203|C19orf53|499|nonsense_mediated_decay|	nonsense_mediated_decay	1.26294	0.0368862	2.3975	0.000998176
C19orf66	ENST00000253110.15|ENSG00000130813.17|OTTHUMG00000180393.2|OTTHUMT00000451129.1|C19orf66-201|C19orf66|2117|protein_coding|	protein_coding	1.78809	0.000938916	1.7537	0.0231087
C1QTNF1	ENST00000583904.5|ENSG00000173918.14|OTTHUMG00000177533.6|OTTHUMT00000437398.1|C1QTNF1-212|C1QTNF1|1129|protein_coding|	protein_coding	-0.327618	0.778135	3.55871	3.49846e-05
C1R	ENST00000536053.6|ENSG00000159403.15|OTTHUMG00000168149.6|OTTHUMT00000398446.4|C1R-202|C1R|2347|protein_coding|	protein_coding	1.07643	0.0233827	1.55586	0.0162556
C1S	ENST00000328916.7|ENSG00000182326.14|OTTHUMG00000150305.4|OTTHUMT00000317483.1|C1S-201|C1S|2972|protein_coding|	protein_coding	0.41108	0.047185	1.24635	1.00047e-06
C20orf27	ENST00000399683.7|ENSG00000101220.17|OTTHUMG00000031753.2|OTTHUMT00000077753.1|C20orf27-204|C20orf27|933|protein_coding|	protein_coding	-0.0836513	0.797887	-2.76724	1.9895e-05
C21orf33	ENST00000419699.1|ENSG00000160221.16|OTTHUMG00000086916.7|OTTHUMT00000195833.1|C21orf33-204|C21orf33|674|protein_coding|	protein_coding	-0.0895205	0.865542	1.48603	0.00307881
C21orf59	ENST00000425336.1|ENSG00000159079.18|OTTHUMG00000179510.2|OTTHUMT00000139434.3|C21orf59-204|C21orf59|873|protein_coding|	protein_coding	-0.574315	0.155743	-2.08073	0.00354513
C22orf23	ENST00000418863.5|ENSG00000128346.10|OTTHUMG00000150672.3|OTTHUMT00000319566.2|C22orf23-204|C22orf23|563|protein_coding|	protein_coding	-1.08665	0.0454242	1.50712	0.0327303
C22orf39	ENST00000509549.5|ENSG00000242259.8|OTTHUMG00000150137.4|OTTHUMT00000367691.1|C22orf39-204|C22orf39|2979|nonsense_mediated_decay|	nonsense_mediated_decay	0.848428	0.120642	1.64516	0.0168428
C2orf81	ENST00000612891.4|ENSG00000284308.1|OTTHUMG00000164184.3|-|C2orf81-202|C2orf81|1902|protein_coding|	protein_coding	-0.190933	0.780045	1.93137	0.0049447
C2orf82	ENST00000409533.5|ENSG00000182600.9|OTTHUMG00000133273.6|OTTHUMT00000330286.1|C2orf82-203|C2orf82|561|protein_coding|	protein_coding	-0.82318	0.126986	1.49723	0.0421209
C4orf48	ENST00000409248.8|ENSG00000243449.6|OTTHUMG00000154503.2|OTTHUMT00000335536.2|C4orf48-201|C4orf48|433|protein_coding|	protein_coding	0.793072	0.00246096	1.00911	0.00358905
C7orf26	ENST00000359073.9|ENSG00000146576.12|OTTHUMG00000125517.2|OTTHUMT00000324152.1|C7orf26-202|C7orf26|1762|protein_coding|	protein_coding	-0.0251363	0.9761	2.12056	0.00292816
C8orf58	ENST00000289989.9|ENSG00000241852.9|OTTHUMG00000154160.6|OTTHUMT00000334183.1|C8orf58-201|C8orf58|2016|protein_coding|	protein_coding	0.460146	0.442609	1.83726	0.00537462
C8orf59	ENST00000523281.5|ENSG00000176731.11|OTTHUMG00000164787.9|OTTHUMT00000381057.3|C8orf59-205|C8orf59|756|protein_coding|	protein_coding	0.312446	0.577397	-1.9919	0.030544
C9orf3	ENST00000375315.6|ENSG00000148120.16|OTTHUMG00000020276.4|-|C9orf3-203|C9orf3|3136|protein_coding|	protein_coding	0.774395	0.122887	2.29589	9.6165e-06
C9orf3	ENST00000297979.9|ENSG00000148120.16|OTTHUMG00000020276.4|OTTHUMT00000053197.1|C9orf3-202|C9orf3|2820|protein_coding|	protein_coding	0.249008	0.352234	-2.23315	0.000125739
C9orf64	ENST00000314700.5|ENSG00000165118.14|OTTHUMG00000020111.2|OTTHUMT00000052866.1|C9orf64-201|C9orf64|2067|protein_coding|	protein_coding	-0.691674	0.342911	-2.25052	0.046976
CAB39L	ENST00000409130.5|ENSG00000102547.18|OTTHUMG00000016914.5|OTTHUMT00000335457.1|CAB39L-204|CAB39L|1411|protein_coding|	protein_coding	-2.19009	0.00100026	2.70027	2.05557e-07
CACNA2D2	ENST00000360963.7|ENSG00000007402.11|OTTHUMG00000156887.4|OTTHUMT00000346455.2|CACNA2D2-202|CACNA2D2|5272|protein_coding|	protein_coding	-1.95169	0.0496632	1.78096	0.0206356
CACTIN	ENST00000591726.1|ENSG00000105298.13|OTTHUMG00000180808.6|OTTHUMT00000457371.2|CACTIN-208|CACTIN|699|protein_coding|	protein_coding	-0.854277	0.160766	-2.5181	0.0131275
CACTIN	ENST00000587175.1|ENSG00000105298.13|OTTHUMG00000180808.6|OTTHUMT00000453085.2|CACTIN-205|CACTIN|2216|retained_intron|	retained_intron	-0.332302	0.643462	1.98332	0.00102145
CACYBP	ENST00000406752.1|ENSG00000116161.17|OTTHUMG00000034941.7|OTTHUMT00000326557.2|CACYBP-203|CACYBP|243|protein_coding|	protein_coding	0.314842	0.177092	-1.81622	4.16132e-05
CADM3-AS1	ENST00000609696.1|ENSG00000225670.4|OTTHUMG00000037178.4|OTTHUMT00000472705.1|CADM3-AS1-202|CADM3-AS1|480|antisense_RNA|	antisense_RNA	-1.74433	0.00403868	1.28903	0.010598
CALM1	ENST00000553422.1|ENSG00000198668.10|OTTHUMG00000171044.2|OTTHUMT00000411358.1|CALM1-204|CALM1|438|nonsense_mediated_decay|	nonsense_mediated_decay	-0.433009	0.381939	-1.46295	0.0408428
CALM1	ENST00000553542.5|ENSG00000198668.10|OTTHUMG00000171044.2|OTTHUMT00000411354.1|CALM1-205|CALM1|877|protein_coding|	protein_coding	1.08335	4.85216e-20	-0.3606	0.0499017
CALM3	ENST00000598871.5|ENSG00000160014.16|OTTHUMG00000133517.2|OTTHUMT00000466573.1|CALM3-211|CALM3|561|protein_coding|	protein_coding	0.133391	0.91884	2.72683	0.0104065
CALM3	ENST00000599839.5|ENSG00000160014.16|OTTHUMG00000133517.2|OTTHUMT00000466577.1|CALM3-212|CALM3|1355|protein_coding|	protein_coding	-0.385925	0.356193	-3.20323	0.000109474
CAMK2G	ENST00000441192.1|ENSG00000148660.20|OTTHUMG00000018492.4|OTTHUMT00000048723.1|CAMK2G-209|CAMK2G|1224|protein_coding|	protein_coding	-1.51555	0.0547229	2.24143	0.0061461
CAMSAP1	ENST00000482664.5|ENSG00000130559.18|OTTHUMG00000020918.4|OTTHUMT00000055028.2|CAMSAP1-206|CAMSAP1|677|retained_intron|	retained_intron	0.388756	0.535775	2.51893	6.40278e-05
CAMSAP2	ENST00000447701.2|ENSG00000118200.14|OTTHUMG00000035740.4|OTTHUMT00000098717.2|CAMSAP2-204|CAMSAP2|673|nonsense_mediated_decay|	nonsense_mediated_decay	0.738467	0.195489	1.66698	0.0233403
CAMTA2	ENST00000348066.7|ENSG00000108509.20|OTTHUMG00000099417.5|OTTHUMT00000216876.1|CAMTA2-201|CAMTA2|4491|protein_coding|	protein_coding	0.436403	0.188674	-1.3936	0.0203748
CAMTA2	ENST00000572192.1|ENSG00000108509.20|OTTHUMG00000099417.5|OTTHUMT00000438759.1|CAMTA2-206|CAMTA2|856|retained_intron|	retained_intron	-0.78871	0.208033	2.28263	5.08246e-06
CANT1	ENST00000588096.1|ENSG00000171302.16|OTTHUMG00000177570.8|OTTHUMT00000437738.1|CANT1-206|CANT1|369|retained_intron|	retained_intron	0.39867	0.563267	2.99576	1.43241e-06
CANX	ENST00000504579.5|ENSG00000127022.14|OTTHUMG00000130910.12|OTTHUMT00000371825.1|CANX-208|CANX|533|nonsense_mediated_decay|	nonsense_mediated_decay	-0.31252	0.668502	-2.12045	0.0423049
CAP1	ENST00000417287.5|ENSG00000131236.16|OTTHUMG00000004493.2|OTTHUMT00000013123.2|CAP1-209|CAP1|610|protein_coding|	protein_coding	1.17302	0.042107	2.42264	0.00186707
CAPN15	ENST00000562370.5|ENSG00000103326.11|OTTHUMG00000119059.5|OTTHUMT00000420513.2|CAPN15-202|CAPN15|942|protein_coding|	protein_coding	1.14594	2.85834e-07	0.80825	0.0130415
CAPNS1	ENST00000589146.5|ENSG00000126247.10|OTTHUMG00000160811.9|OTTHUMT00000457410.1|CAPNS1-207|CAPNS1|578|protein_coding|	protein_coding	0.24904	0.726127	2.3097	0.000102596
CAPNS1	ENST00000590874.5|ENSG00000126247.10|OTTHUMG00000160811.9|OTTHUMT00000457414.1|CAPNS1-211|CAPNS1|926|protein_coding|	protein_coding	-0.0509745	0.946453	2.33613	7.35978e-05
CAPS	ENST00000588865.2|ENSG00000105519.15|OTTHUMG00000180619.5|OTTHUMT00000452259.3|CAPS-204|CAPS|537|protein_coding|	protein_coding	0.163323	0.742968	1.57874	0.000487427
CAPZA2	ENST00000628758.1|ENSG00000198898.13|OTTHUMG00000023185.14|-|CAPZA2-214|CAPZA2|525|protein_coding|	protein_coding	-0.57204	0.28594	-1.76421	0.0225665
CAPZB	ENST00000459967.6|ENSG00000077549.17|OTTHUMG00000002556.6|OTTHUMT00000007264.2|CAPZB-207|CAPZB|579|processed_transcript|	processed_transcript	1.19636	0.027363	2.01991	0.00284843
CARD10	ENST00000403299.5|ENSG00000100065.14|OTTHUMG00000150592.3|OTTHUMT00000318997.1|CARD10-202|CARD10|4113|protein_coding|	protein_coding	1.09027	0.168751	2.57242	0.00155287
CARD14	ENST00000576785.5|ENSG00000141527.16|OTTHUMG00000177549.6|OTTHUMT00000437505.4|CARD14-214|CARD14|562|protein_coding|	protein_coding	1.7207	6.89572e-06	-1.73251	0.0498781
CARD14	ENST00000575500.5|ENSG00000141527.16|OTTHUMG00000177549.6|OTTHUMT00000437509.2|CARD14-212|CARD14|3766|nonsense_mediated_decay|	nonsense_mediated_decay	2.09553	9.21407e-10	1.08552	0.0464893
CARD8	ENST00000521613.5|ENSG00000105483.17|OTTHUMG00000165047.7|OTTHUMT00000381560.1|CARD8-221|CARD8|1903|protein_coding|	protein_coding	-0.269079	0.701854	1.58424	0.0481288
CARD8	ENST00000520153.5|ENSG00000105483.17|OTTHUMG00000165047.7|OTTHUMT00000381556.1|CARD8-216|CARD8|2617|protein_coding|	protein_coding	-0.713287	0.152408	-2.7462	0.021169
CASP2	ENST00000350623.7|ENSG00000106144.19|OTTHUMG00000023641.4|OTTHUMT00000327426.1|CASP2-202|CASP2|1146|nonsense_mediated_decay|	nonsense_mediated_decay	1.0168	0.0656885	1.74534	0.0282567
CASP6	ENST00000352981.7|ENSG00000138794.9|OTTHUMG00000131914.4|OTTHUMT00000254867.3|CASP6-202|CASP6|1347|protein_coding|	protein_coding	0.363894	0.379649	1.07677	0.0236006
CAST	ENST00000506811.5|ENSG00000153113.23|OTTHUMG00000128413.11|OTTHUMT00000370561.2|CAST-217|CAST|582|protein_coding|	protein_coding	0.0123701	0.986557	2.32599	0.00234048
CAST	ENST00000421689.6|ENSG00000153113.23|OTTHUMG00000128413.11|OTTHUMT00000370545.3|CAST-208|CAST|913|protein_coding|	protein_coding	-0.147256	0.833675	-1.87454	0.0426308
CAST	ENST00000514055.5|ENSG00000153113.23|OTTHUMG00000128413.11|OTTHUMT00000370562.3|CAST-240|CAST|559|protein_coding|	protein_coding	-0.429515	0.484756	1.87219	0.0136532
CASTOR2	ENST00000622472.1|ENSG00000274070.1|OTTHUMG00000181541.2|OTTHUMT00000456516.2|CASTOR2-202|CASTOR2|809|retained_intron|	retained_intron	0.795293	0.113187	1.56883	0.00889175
CASZ1	ENST00000478524.1|ENSG00000130940.14|OTTHUMG00000002035.5|OTTHUMT00000005674.1|CASZ1-205|CASZ1|337|processed_transcript|	processed_transcript	0.00168605	0.996881	-1.57603	0.0225363
CAV1	ENST00000489856.1|ENSG00000105974.11|OTTHUMG00000023413.8|OTTHUMT00000315775.1|CAV1-208|CAV1|575|retained_intron|	retained_intron	0.225786	0.733337	2.31787	0.000578403
CBFA2T2	ENST00000342704.10|ENSG00000078699.21|OTTHUMG00000032261.6|OTTHUMT00000471953.1|CBFA2T2-201|CBFA2T2|2864|protein_coding|	protein_coding	1.98546	0.00330612	2.20109	0.0142579
CBWD1	ENST00000377400.8|ENSG00000172785.18|OTTHUMG00000019425.5|OTTHUMT00000477771.1|CBWD1-203|CBWD1|1792|protein_coding|	protein_coding	-0.388102	0.566528	1.81581	0.0339351
CC2D2A	ENST00000503292.5|ENSG00000048342.15|OTTHUMG00000160255.15|OTTHUMT00000359906.2|CC2D2A-204|CC2D2A|5175|protein_coding|	protein_coding	-0.647911	0.380818	-2.35388	0.0337903
CCDC112	ENST00000512261.5|ENSG00000164221.12|OTTHUMG00000128894.3|OTTHUMT00000370999.1|CCDC112-206|CCDC112|2279|protein_coding|	protein_coding	-0.377653	0.630836	1.50783	0.0479947
CCDC12	ENST00000446836.5|ENSG00000160799.11|OTTHUMG00000133513.5|OTTHUMT00000344353.4|CCDC12-203|CCDC12|412|protein_coding|	protein_coding	0.883092	0.382004	2.96642	0.00186652
CCDC12	ENST00000605875.1|ENSG00000160799.11|OTTHUMG00000133513.5|OTTHUMT00000470087.2|CCDC12-213|CCDC12|380|protein_coding|	protein_coding	-0.904508	0.0149105	-1.40389	0.0210868
CCDC146	ENST00000478101.1|ENSG00000135205.14|OTTHUMG00000162595.2|OTTHUMT00000341607.1|CCDC146-208|CCDC146|726|retained_intron|	retained_intron	-1.69642	0.00161945	1.11754	0.0392106
CCHCR1	ENST00000451521.6|ENSG00000204536.13|OTTHUMG00000031112.8|OTTHUMT00000257978.2|CCHCR1-208|CCHCR1|2587|protein_coding|	protein_coding	0.172346	0.844104	2.19252	0.00328243
CCNB1IP1	ENST00000353689.8|ENSG00000100814.17|OTTHUMG00000029509.5|-|CCNB1IP1-201|CCNB1IP1|1305|protein_coding|	protein_coding	1.35237	0.193446	3.42416	0.000671944
CCND1	ENST00000545484.1|ENSG00000110092.3|OTTHUMG00000167877.3|OTTHUMT00000396815.1|CCND1-206|CCND1|430|retained_intron|	retained_intron	-1.25444	0.0153589	1.55323	0.0132078
CCND1	ENST00000535993.1|ENSG00000110092.3|OTTHUMG00000167877.3|OTTHUMT00000396814.1|CCND1-202|CCND1|568|retained_intron|	retained_intron	-0.209	0.870912	3.39249	0.000378825
CCND3	ENST00000513956.5|ENSG00000112576.12|OTTHUMG00000014690.8|OTTHUMT00000372262.1|CCND3-219|CCND3|562|processed_transcript|	processed_transcript	0.731201	0.239632	2.26794	0.001526
CCNG1	ENST00000511683.6|ENSG00000113328.18|OTTHUMG00000130380.8|OTTHUMT00000474560.1|CCNG1-210|CCNG1|1071|processed_transcript|	processed_transcript	-0.485671	0.0157328	-1.01026	0.00092121
CCNH	ENST00000510020.5|ENSG00000134480.13|OTTHUMG00000119077.4|OTTHUMT00000369740.1|CCNH-207|CCNH|582|processed_transcript|	processed_transcript	1.47204	0.00750913	1.82435	0.0251627
CCPG1	ENST00000425574.7|ENSG00000260916.7|OTTHUMG00000172678.3|OTTHUMT00000419851.1|CCPG1-202|CCPG1|1945|protein_coding|	protein_coding	-0.330831	0.636068	2.03864	0.000468705
CCT5	ENST00000503454.5|ENSG00000150753.11|OTTHUMG00000131042.7|OTTHUMT00000366639.1|CCT5-204|CCT5|762|nonsense_mediated_decay|	nonsense_mediated_decay	1.05658	0.055357	1.71339	0.0165213
CCZ1B	ENST00000490178.1|ENSG00000146574.15|OTTHUMG00000152441.3|OTTHUMT00000324367.1|CCZ1B-212|CCZ1B|527|retained_intron|	retained_intron	-1.06503	0.0624453	-2.02359	0.034827
CD164	ENST00000512821.5|ENSG00000135535.15|OTTHUMG00000015339.2|OTTHUMT00000365625.1|CD164-210|CD164|964|protein_coding|	protein_coding	1.74261	0.0366621	2.24403	0.0459772
CD200R1	ENST00000295863.4|ENSG00000163606.10|OTTHUMG00000159298.1|OTTHUMT00000354470.1|CD200R1-201|CD200R1|1692|protein_coding|	protein_coding	-0.0192744	0.978145	1.60586	0.0413053
CD24	ENST00000619133.4|ENSG00000272398.5|OTTHUMG00000188439.1|OTTHUMT00000477241.1|CD24-204|CD24|2513|protein_coding|	protein_coding	1.54679	4.71067e-12	1.02596	0.00102215
CD276	ENST00000567582.5|ENSG00000103855.17|OTTHUMG00000137585.8|OTTHUMT00000419778.1|CD276-219|CD276|556|nonsense_mediated_decay|	nonsense_mediated_decay	-0.0250945	0.974081	3.27435	5.79698e-07
CD34	ENST00000367036.7|ENSG00000174059.16|OTTHUMG00000036565.2|OTTHUMT00000088935.2|CD34-203|CD34|2538|protein_coding|	protein_coding	-1.38414	2.2387e-10	0.61518	0.0111577
CD37	ENST00000595725.5|ENSG00000104894.11|OTTHUMG00000183183.2|OTTHUMT00000465531.1|CD37-208|CD37|1121|nonsense_mediated_decay|	nonsense_mediated_decay	1.03743	0.125692	2.32349	0.0028308
CD3E	ENST00000361763.8|ENSG00000198851.9|OTTHUMG00000166968.1|OTTHUMT00000392120.1|CD3E-201|CD3E|1548|protein_coding|	protein_coding	1.14431	1.31626e-15	-0.551282	0.0242397
CD46	ENST00000462968.2|ENSG00000117335.19|OTTHUMG00000036397.15|OTTHUMT00000088896.2|CD46-210|CD46|473|protein_coding|	protein_coding	-0.63153	0.0945058	-1.99447	0.00451739
CD46	ENST00000488596.5|ENSG00000117335.19|OTTHUMG00000036397.15|OTTHUMT00000088688.9|CD46-215|CD46|872|processed_transcript|	processed_transcript	0.141516	0.77847	1.31855	0.00578947
CD47	ENST00000517766.5|ENSG00000196776.14|OTTHUMG00000044216.2|OTTHUMT00000376474.1|CD47-205|CD47|538|protein_coding|	protein_coding	1.57332	7.59196e-48	-0.314236	0.0150129
CD55	ENST00000343420.6|ENSG00000196352.14|OTTHUMG00000036255.4|OTTHUMT00000088273.2|CD55-202|CD55|978|protein_coding|	protein_coding	0.255601	0.451186	-1.19697	0.0313615
CD63	ENST00000548898.5|ENSG00000135404.11|OTTHUMG00000170454.5|OTTHUMT00000409488.2|CD63-207|CD63|727|protein_coding|	protein_coding	-0.524787	0.0987795	1.13421	0.00129788
CD63	ENST00000552067.5|ENSG00000135404.11|OTTHUMG00000170454.5|OTTHUMT00000409511.1|CD63-212|CD63|621|protein_coding|	protein_coding	-0.674936	0.228445	-2.24859	0.0273902
CD82	ENST00000524750.1|ENSG00000085117.11|OTTHUMG00000166472.2|OTTHUMT00000389898.1|CD82-204|CD82|757|protein_coding|	protein_coding	0.908326	3.048e-08	-1.24686	2.63087e-05
CD82	ENST00000526958.5|ENSG00000085117.11|OTTHUMG00000166472.2|OTTHUMT00000389885.2|CD82-208|CD82|538|protein_coding|	protein_coding	0.823156	2.69521e-07	-1.26616	1.07925e-05
CD9	ENST00000536586.5|ENSG00000010278.12|OTTHUMG00000044400.4|OTTHUMT00000399411.2|CD9-206|CD9|739|protein_coding|	protein_coding	0.0682171	0.916754	2.13968	2.47532e-05
CD99	ENST00000623253.4|ENSG00000002586.18|OTTHUMG00000021073.6|OTTHUMT00000478891.1|CD99-211|CD99|573|nonsense_mediated_decay|	nonsense_mediated_decay	0.323831	0.714697	2.12057	0.0157998
CD99	ENST00000623253.4_PAR_Y|ENSG00000002586.18_PAR_Y|OTTHUMG00000021073.6|OTTHUMT00000478891.1|CD99-211|CD99|573|nonsense_mediated_decay|	nonsense_mediated_decay	0.323831	0.714697	2.12057	0.0157998
CDC16	ENST00000360383.7|ENSG00000130177.14|OTTHUMG00000017402.4|-|CDC16-204|CDC16|2211|protein_coding|	protein_coding	-0.814093	0.190574	2.15388	0.0053391
CDC34	ENST00000606400.3|ENSG00000099804.8|OTTHUMG00000180558.10|OTTHUMT00000457366.5|CDC34-206|CDC34|899|retained_intron|	retained_intron	0.593827	0.379737	2.10363	0.0034423
CDC37	ENST00000589625.5|ENSG00000105401.8|OTTHUMG00000180578.2|OTTHUMT00000451989.1|CDC37-205|CDC37|587|protein_coding|	protein_coding	1.54941	2.0662e-05	1.20418	0.0256016
CDCA7L	ENST00000465490.1|ENSG00000164649.19|OTTHUMG00000128429.7|OTTHUMT00000314300.1|CDCA7L-208|CDCA7L|998|processed_transcript|	processed_transcript	0.124243	0.900599	3.06711	6.39947e-05
CDH13	ENST00000539548.6|ENSG00000140945.16|OTTHUMG00000176635.2|OTTHUMT00000432926.1|CDH13-204|CDH13|2199|nonsense_mediated_decay|	nonsense_mediated_decay	0.0244764	0.975681	1.56544	0.0460445
CDK2	ENST00000555408.5|ENSG00000123374.10|OTTHUMG00000170575.1|OTTHUMT00000409652.1|CDK2-208|CDK2|2598|nonsense_mediated_decay|	nonsense_mediated_decay	-0.549309	0.292713	-2.23162	0.0456833
CDPF1	ENST00000314567.7|ENSG00000205643.10|OTTHUMG00000030672.4|OTTHUMT00000075560.4|CDPF1-201|CDPF1|1875|protein_coding|	protein_coding	0.615598	0.259583	1.47381	0.0204187
CDRT4	ENST00000619038.4|ENSG00000239704.10|OTTHUMG00000059070.13|OTTHUMT00000130383.8|CDRT4-204|CDRT4|2498|protein_coding|	protein_coding	-0.142325	0.845039	2.1723	0.000539598
CEP170	ENST00000490813.5|ENSG00000143702.15|OTTHUMG00000039862.5|OTTHUMT00000096181.2|CEP170-216|CEP170|1070|protein_coding|	protein_coding	0.0381707	0.961424	1.80997	0.0086452
CEP250	ENST00000425934.5|ENSG00000126001.15|OTTHUMG00000032343.39|OTTHUMT00000331754.3|CEP250-207|CEP250|2156|protein_coding|	protein_coding	0.672391	0.122362	1.27153	0.0205358
CEP85	ENST00000640292.1|ENSG00000130695.14|OTTHUMG00000003380.5|-|CEP85-209|CEP85|2286|protein_coding|	protein_coding	0.901438	0.223131	2.59801	0.000379328
CEPT1	ENST00000615636.4|ENSG00000134255.13|OTTHUMG00000012357.4|-|CEPT1-211|CEPT1|1966|protein_coding|	protein_coding	-0.11997	0.892261	2.89265	0.000248305
CES1	ENST00000565568.1|ENSG00000198848.12|OTTHUMG00000176718.4|OTTHUMT00000433279.2|CES1-207|CES1|659|nonsense_mediated_decay|	nonsense_mediated_decay	-2.47464	0.000127011	1.42422	0.00229184
CES2	ENST00000561697.5|ENSG00000172831.11|OTTHUMG00000137517.5|OTTHUMT00000431969.3|CES2-203|CES2|918|protein_coding|	protein_coding	1.24675	0.067536	2.90745	0.000215362
CFAP97	ENST00000296775.7|ENSG00000164323.12|OTTHUMG00000160468.3|-|CFAP97-201|CFAP97|903|protein_coding|	protein_coding	1.23955	0.0141946	-3.35633	0.00108169
CFB	ENST00000425368.6|ENSG00000243649.8|OTTHUMG00000031198.4|OTTHUMT00000076395.3|CFB-271|CFB|2862|protein_coding|	protein_coding	2.15183	1.2126e-44	0.36324	0.0489368
CFD	ENST00000592860.2|ENSG00000197766.7|OTTHUMG00000181840.5|OTTHUMT00000457892.4|CFD-202|CFD|809|protein_coding|	protein_coding	-0.78661	0.345904	2.56758	5.369e-05
CFL1	ENST00000526975.1|ENSG00000172757.12|OTTHUMG00000166602.5|OTTHUMT00000390708.2|CFL1-205|CFL1|567|protein_coding|	protein_coding	0.0266148	0.967674	3.01961	3.29053e-06
CFL1	ENST00000530945.1|ENSG00000172757.12|OTTHUMG00000166602.5|OTTHUMT00000390702.1|CFL1-210|CFL1|1509|retained_intron|	retained_intron	0.480645	0.0736907	1.50488	1.11611e-06
CFLAR	ENST00000443227.5|ENSG00000003402.19|OTTHUMG00000132819.19|OTTHUMT00000336696.1|CFLAR-214|CFLAR|1679|protein_coding|	protein_coding	1.18608	0.154835	2.40048	0.0114891
CFLAR	ENST00000341222.10|ENSG00000003402.19|OTTHUMG00000132819.19|OTTHUMT00000336697.1|CFLAR-203|CFLAR|1283|protein_coding|	protein_coding	1.09831	2.61923e-14	-0.55024	0.0261025
CHADL	ENST00000455425.1|ENSG00000100399.15|OTTHUMG00000150936.3|OTTHUMT00000320599.2|CHADL-203|CHADL|758|protein_coding|	protein_coding	-1.21527	1.71445e-08	0.476852	0.0334248
CHAF1A	ENST00000587368.1|ENSG00000167670.15|OTTHUMG00000181922.5|OTTHUMT00000459330.1|CHAF1A-204|CHAF1A|564|processed_transcript|	processed_transcript	0.101002	0.895591	1.75074	0.0118922
CHCHD7	ENST00000523975.5|ENSG00000170791.17|OTTHUMG00000074081.4|OTTHUMT00000157277.2|CHCHD7-218|CHCHD7|1805|protein_coding|	protein_coding	-1.13273	0.0370591	1.07853	0.0388957
CHD2	ENST00000636306.1|ENSG00000173575.20|OTTHUMG00000185958.12|OTTHUMT00000490239.1|CHD2-223|CHD2|1755|processed_transcript|	processed_transcript	-1.35743	0.0381192	2.55893	7.27872e-07
CHD4	ENST00000536999.1|ENSG00000111642.14|OTTHUMG00000169164.2|OTTHUMT00000402639.1|CHD4-206|CHD4|318|processed_transcript|	processed_transcript	0.404422	0.31723	1.32196	0.00558693
CHMP1A	ENST00000547614.5|ENSG00000131165.14|OTTHUMG00000169521.1|OTTHUMT00000404590.1|CHMP1A-203|CHMP1A|653|processed_transcript|	processed_transcript	-1.03121	0.0739163	-2.0862	0.0170469
CHMP1A	ENST00000550102.5|ENSG00000131165.14|OTTHUMG00000169521.1|OTTHUMT00000404586.1|CHMP1A-208|CHMP1A|803|protein_coding|	protein_coding	1.34532	0.00317477	1.96759	0.000711922
CHMP1A	ENST00000535997.6|ENSG00000131165.14|OTTHUMG00000169521.1|OTTHUMT00000404583.1|CHMP1A-202|CHMP1A|2295|protein_coding|	protein_coding	1.3235	2.57744e-05	1.18477	0.00956159
CHMP1A	ENST00000549139.5|ENSG00000131165.14|OTTHUMG00000169521.1|OTTHUMT00000404585.1|CHMP1A-206|CHMP1A|812|retained_intron|	retained_intron	0.0838599	0.920334	3.09084	2.59877e-07
CHMP2B	ENST00000471660.5|ENSG00000083937.8|OTTHUMG00000158982.4|OTTHUMT00000352809.2|CHMP2B-203|CHMP2B|2528|protein_coding|	protein_coding	-0.313615	0.494989	1.06262	0.043177
CHMP7	ENST00000520102.1|ENSG00000147457.13|OTTHUMG00000131785.5|OTTHUMT00000375462.1|CHMP7-208|CHMP7|555|processed_transcript|	processed_transcript	-0.0553472	0.938206	-1.93532	0.0350247
CHMP7	ENST00000519503.5|ENSG00000147457.13|OTTHUMG00000131785.5|OTTHUMT00000375460.1|CHMP7-205|CHMP7|917|nonsense_mediated_decay|	nonsense_mediated_decay	0.221394	0.637008	1.51185	0.00170532
CHRDL1	ENST00000482160.5|ENSG00000101938.14|OTTHUMG00000022199.3|OTTHUMT00000357087.1|CHRDL1-205|CHRDL1|1537|protein_coding|	protein_coding	-1.16958	0.0697963	-2.53917	0.00931647
CHRNE	ENST00000572438.1|ENSG00000108556.7|OTTHUMG00000090778.4|OTTHUMT00000439887.1|CHRNE-202|CHRNE|1847|retained_intron|	retained_intron	0.488266	0.433145	1.74754	0.0343872
CHST11	ENST00000549016.1|ENSG00000171310.10|OTTHUMG00000169803.3|OTTHUMT00000406057.2|CHST11-204|CHST11|573|protein_coding|	protein_coding	1.68717	0.000441129	1.63691	0.0159215
CHST12	ENST00000432336.1|ENSG00000136213.9|OTTHUMG00000023849.7|OTTHUMT00000325030.3|CHST12-203|CHST12|921|protein_coding|	protein_coding	0.44985	0.548783	2.0166	0.0120633
CHTF8	ENST00000519534.1|ENSG00000168802.12|OTTHUMG00000163909.8|OTTHUMT00000376641.2|CHTF8-206|CHTF8|723|nonsense_mediated_decay|	nonsense_mediated_decay	-0.00287685	0.995558	1.13118	0.0182862
CIAPIN1	ENST00000394391.8|ENSG00000005194.14|OTTHUMG00000133457.7|OTTHUMT00000257332.4|CIAPIN1-201|CIAPIN1|2182|protein_coding|	protein_coding	1.62473	0.0420507	2.51027	0.0105459
CIB2	ENST00000557818.1|ENSG00000136425.12|OTTHUMG00000143731.4|OTTHUMT00000419333.1|CIB2-203|CIB2|669|nonsense_mediated_decay|	nonsense_mediated_decay	-0.269883	0.629151	1.67508	0.000554816
CIC	ENST00000160740.7|ENSG00000079432.7|OTTHUMG00000182794.3|OTTHUMT00000468598.1|CIC-201|CIC|6111|protein_coding|	protein_coding	0.936611	0.0601644	1.91209	0.000579071
CIC	ENST00000573349.5|ENSG00000079432.7|OTTHUMG00000182794.3|OTTHUMT00000438534.2|CIC-205|CIC|927|protein_coding|	protein_coding	-0.191004	0.623556	1.33324	0.000671944
CIRBP	ENST00000593048.5|ENSG00000099622.13|OTTHUMG00000180145.10|OTTHUMT00000449995.1|CIRBP-241|CIRBP|650|nonsense_mediated_decay|	nonsense_mediated_decay	-1.26014	5.40081e-06	-0.955765	0.0169207
CIRBP	ENST00000586636.5|ENSG00000099622.13|OTTHUMG00000180145.10|OTTHUMT00000449999.1|CIRBP-210|CIRBP|938|nonsense_mediated_decay|	nonsense_mediated_decay	-0.245805	0.540106	1.0065	0.0177952
CIRBP	ENST00000586773.5|ENSG00000099622.13|OTTHUMG00000180145.10|OTTHUMT00000449990.4|CIRBP-211|CIRBP|942|protein_coding|	protein_coding	-1.82035	0.00450069	-2.87715	0.00530314
CKB	ENST00000555366.1|ENSG00000166165.12|OTTHUMG00000171786.2|OTTHUMT00000415119.1|CKB-212|CKB|419|retained_intron|	retained_intron	-1.37414	1.25097e-12	-1.26942	7.12273e-07
CKB	ENST00000554426.5|ENSG00000166165.12|OTTHUMG00000171786.2|OTTHUMT00000415121.1|CKB-208|CKB|775|retained_intron|	retained_intron	-0.218979	0.773719	1.80292	0.00611584
CLASP2	ENST00000476251.1|ENSG00000163539.16|OTTHUMG00000156489.13|OTTHUMT00000356559.1|CLASP2-211|CLASP2|1097|nonsense_mediated_decay|	nonsense_mediated_decay	-1.05428	0.0272442	-2.34759	0.0121262
CLCN3	ENST00000513761.5|ENSG00000109572.13|OTTHUMG00000160973.4|OTTHUMT00000363210.2|CLCN3-209|CLCN3|6692|protein_coding|	protein_coding	-0.477475	0.317741	1.18625	0.0222822
CLDN12	ENST00000427904.1|ENSG00000157224.15|OTTHUMG00000156612.6|OTTHUMT00000140205.3|CLDN12-205|CLDN12|618|protein_coding|	protein_coding	1.46079	0.00712154	1.76007	0.0117623
CLDN3	ENST00000395145.3|ENSG00000165215.6|OTTHUMG00000023424.2|OTTHUMT00000252310.1|CLDN3-201|CLDN3|1274|protein_coding|	protein_coding	-1.37973	1.28339e-07	0.967892	9.96671e-05
CLDND1	ENST00000508902.5|ENSG00000080822.16|OTTHUMG00000160050.19|OTTHUMT00000359315.1|CLDND1-220|CLDND1|916|protein_coding|	protein_coding	-0.696037	0.0325173	-1.09137	0.036161
CLEC3B	ENST00000490386.1|ENSG00000163815.5|OTTHUMG00000133087.2|OTTHUMT00000346994.1|CLEC3B-203|CLEC3B|708|processed_transcript|	processed_transcript	-1.84828	0.406194	5.35691	0.0011255
CLIC2	ENST00000321926.4|ENSG00000155962.12|OTTHUMG00000022660.4|OTTHUMT00000316587.2|CLIC2-201|CLIC2|629|protein_coding|	protein_coding	-0.638189	0.128907	-1.82942	0.0162748
CLIC3	ENST00000480181.1|ENSG00000169583.12|OTTHUMG00000020954.3|OTTHUMT00000055177.2|CLIC3-202|CLIC3|794|processed_transcript|	processed_transcript	1.10747	0.127119	1.82444	0.0363221
CLIP1	ENST00000545889.5|ENSG00000130779.19|OTTHUMG00000168922.3|OTTHUMT00000401618.1|CLIP1-218|CLIP1|4633|protein_coding|	protein_coding	-1.03372	0.277786	3.26203	3.99655e-06
CLK1	ENST00000409769.6|ENSG00000013441.15|OTTHUMG00000132784.3|OTTHUMT00000336138.2|CLK1-203|CLK1|1192|protein_coding|	protein_coding	-0.874875	0.00136042	-1.07911	0.0102732
CLK3	ENST00000566926.1|ENSG00000179335.18|OTTHUMG00000141320.13|OTTHUMT00000421162.1|CLK3-218|CLK3|646|protein_coding|	protein_coding	0.830597	0.0704612	1.92923	8.70528e-05
CLK3	ENST00000568488.5|ENSG00000179335.18|OTTHUMG00000141320.13|OTTHUMT00000421181.2|CLK3-223|CLK3|481|protein_coding|	protein_coding	0.296433	0.688256	1.75947	0.0137251
CLK4	ENST00000522556.1|ENSG00000113240.12|OTTHUMG00000130893.3|OTTHUMT00000374297.1|CLK4-211|CLK4|1249|nonsense_mediated_decay|	nonsense_mediated_decay	-0.126413	0.845515	1.4095	0.0177952
CLMP	ENST00000530371.5|ENSG00000166250.11|OTTHUMG00000166031.2|OTTHUMT00000387544.1|CLMP-204|CLMP|585|processed_transcript|	processed_transcript	-0.931652	0.198429	1.65317	0.0176431
CLN3	ENST00000565354.5|ENSG00000188603.18|OTTHUMG00000097024.9|OTTHUMT00000430946.1|CLN3-217|CLN3|759|retained_intron|	retained_intron	-0.850224	0.135121	1.33329	0.0366449
CLPTM1L	ENST00000515719.5|ENSG00000049656.13|OTTHUMG00000131015.4|OTTHUMT00000369482.1|CLPTM1L-215|CLPTM1L|382|retained_intron|	retained_intron	0.464759	0.534661	1.82299	0.0175949
CLTB	ENST00000508425.5|ENSG00000175416.12|OTTHUMG00000130662.3|OTTHUMT00000371961.1|CLTB-205|CLTB|527|protein_coding|	protein_coding	-0.503881	0.530688	2.02121	0.00819845
CLTCL1	ENST00000617926.4|ENSG00000070371.15|OTTHUMG00000150109.10|OTTHUMT00000398424.2|CLTCL1-210|CLTCL1|1695|protein_coding|	protein_coding	-1.14725	0.0302024	1.52392	0.00525881
CLTCL1	ENST00000615606.4|ENSG00000070371.15|OTTHUMG00000150109.10|OTTHUMT00000398425.1|CLTCL1-208|CLTCL1|4994|retained_intron|	retained_intron	0.538766	0.454257	2.51074	0.000272093
CLU	ENST00000522502.1|ENSG00000120885.21|OTTHUMG00000102114.7|OTTHUMT00000376159.2|CLU-213|CLU|594|retained_intron|	retained_intron	0.129291	0.875554	2.7398	4.7789e-05
CLUH	ENST00000574426.6|ENSG00000132361.16|OTTHUMG00000177575.9|OTTHUMT00000437810.2|CLUH-210|CLUH|3844|protein_coding|	protein_coding	1.75199	7.96945e-08	1.45622	0.00123656
CLUH	ENST00000576885.5|ENSG00000132361.16|OTTHUMG00000177575.9|OTTHUMT00000437817.2|CLUH-214|CLUH|583|protein_coding|	protein_coding	1.45632	0.0119457	2.01103	0.00680031
CLUH	ENST00000572129.1|ENSG00000132361.16|OTTHUMG00000177575.9|OTTHUMT00000437814.4|CLUH-206|CLUH|480|protein_coding|	protein_coding	1.07967	0.0561627	-2.17307	0.016915
CMIP	ENST00000566513.5|ENSG00000153815.16|OTTHUMG00000176520.4|OTTHUMT00000432402.2|CMIP-209|CMIP|2288|protein_coding|	protein_coding	0.115328	0.769069	1.3137	0.000885893
CMTM4	ENST00000563952.1|ENSG00000183723.12|OTTHUMG00000137500.4|OTTHUMT00000421031.1|CMTM4-204|CMTM4|1023|protein_coding|	protein_coding	-1.32125	0.0192754	-2.0956	0.0174151
CNN1	ENST00000592338.5|ENSG00000130176.7|OTTHUMG00000182033.2|OTTHUMT00000458861.2|CNN1-209|CNN1|525|protein_coding|	protein_coding	-1.55348	0.0668994	2.27146	0.00643277
CNOT11	ENST00000420107.1|ENSG00000158435.7|OTTHUMG00000130686.2|OTTHUMT00000329200.1|CNOT11-202|CNOT11|552|protein_coding|	protein_coding	0.797568	0.00042367	-1.07258	0.031478
CNOT8	ENST00000521450.5|ENSG00000155508.13|OTTHUMG00000130192.3|OTTHUMT00000377454.1|CNOT8-217|CNOT8|1158|protein_coding|	protein_coding	0.952502	0.122235	1.71913	0.0312306
CNOT8	ENST00000519404.5|ENSG00000155508.13|OTTHUMG00000130192.3|OTTHUMT00000377462.1|CNOT8-210|CNOT8|945|protein_coding|	protein_coding	0.258826	0.698053	1.6355	0.0454617
CNOT9	ENST00000418808.1|ENSG00000144580.13|OTTHUMG00000154750.2|OTTHUMT00000336926.1|CNOT9-203|CNOT9|907|protein_coding|	protein_coding	1.40613	0.0604135	2.93974	0.000222338
CNPPD1	ENST00000453038.5|ENSG00000115649.15|OTTHUMG00000133132.3|OTTHUMT00000336221.2|CNPPD1-204|CNPPD1|1154|protein_coding|	protein_coding	1.13537	0.0177353	1.54394	0.0105371
CNTFR	ENST00000610543.4|ENSG00000122756.14|OTTHUMG00000019821.5|-|CNTFR-204|CNTFR|1926|protein_coding|	protein_coding	-1.94279	4.68919e-23	0.40893	0.0313234
CNTFR	ENST00000378980.7|ENSG00000122756.14|OTTHUMG00000019821.5|OTTHUMT00000052176.1|CNTFR-202|CNTFR|2052|protein_coding|	protein_coding	-3.89773	1.26345e-12	0.783521	0.0361061
CNTNAP3	ENST00000493965.5|ENSG00000106714.17|OTTHUMG00000019954.4|OTTHUMT00000052514.1|CNTNAP3-211|CNTNAP3|765|processed_transcript|	processed_transcript	-1.90394	1.5637e-06	0.842345	0.0408474
CNTROB	ENST00000576536.1|ENSG00000170037.13|OTTHUMG00000172932.4|OTTHUMT00000440877.2|CNTROB-211|CNTROB|561|protein_coding|	protein_coding	-0.259971	0.370949	-1.37063	0.00896788
COBL	ENST00000449281.1|ENSG00000106078.17|OTTHUMG00000155999.3|OTTHUMT00000342690.2|COBL-207|COBL|589|protein_coding|	protein_coding	0.371391	0.596299	1.96338	0.00289986
COG5	ENST00000464542.5|ENSG00000164597.13|OTTHUMG00000023895.5|OTTHUMT00000349400.1|COG5-205|COG5|897|retained_intron|	retained_intron	0.279707	0.697653	3.03783	5.19329e-07
COL16A1	ENST00000474000.5|ENSG00000084636.17|OTTHUMG00000003883.22|OTTHUMT00000011070.1|COL16A1-210|COL16A1|676|processed_transcript|	processed_transcript	0.205368	0.78383	2.40342	0.000861362
COL1A1	ENST00000476387.1|ENSG00000108821.13|OTTHUMG00000148674.9|OTTHUMT00000309042.3|COL1A1-205|COL1A1|600|retained_intron|	retained_intron	1.52292	0.0648412	3.04849	0.00468095
COL1A1	ENST00000474644.1|ENSG00000108821.13|OTTHUMG00000148674.9|OTTHUMT00000309037.1|COL1A1-204|COL1A1|640|retained_intron|	retained_intron	0.444702	0.713225	3.67399	0.000401608
COL3A1	ENST00000487010.1|ENSG00000168542.14|OTTHUMG00000132648.6|OTTHUMT00000313498.1|COL3A1-206|COL3A1|2054|retained_intron|	retained_intron	-0.992407	0.0101918	-1.28908	0.0385697
COL4A2	ENST00000480609.1|ENSG00000134871.17|OTTHUMG00000017344.5|OTTHUMT00000312862.1|COL4A2-206|COL4A2|535|retained_intron|	retained_intron	0.236811	0.760585	2.09448	0.00259059
COL5A1	ENST00000618395.4|ENSG00000130635.15|OTTHUMG00000020891.4|-|COL5A1-208|COL5A1|8437|protein_coding|	protein_coding	-3.97639	0.000731425	-3.54153	0.0260176
COL6A1	ENST00000612273.1|ENSG00000142156.14|OTTHUMG00000090440.1|-|COL6A1-207|COL6A1|3251|protein_coding|	protein_coding	-0.163554	0.916604	4.61328	2.87863e-05
COL6A1	ENST00000463060.5|ENSG00000142156.14|OTTHUMG00000090440.1|OTTHUMT00000206882.1|COL6A1-202|COL6A1|863|processed_transcript|	processed_transcript	-0.260598	0.60551	1.29686	0.00533726
COMMD3	ENST00000376836.7|ENSG00000148444.15|OTTHUMG00000017806.3|OTTHUMT00000047159.2|COMMD3-201|COMMD3|1342|protein_coding|	protein_coding	-0.0127591	0.976672	1.0059	0.0111342
COMMD3	ENST00000444869.5|ENSG00000148444.15|OTTHUMG00000017806.3|OTTHUMT00000047161.1|COMMD3-202|COMMD3|757|protein_coding|	protein_coding	-0.0766273	0.90723	1.5661	0.0401562
COMMD3-BMI1	ENST00000602390.5|ENSG00000269897.5|OTTHUMG00000184031.2|OTTHUMT00000467824.2|COMMD3-BMI1-205|COMMD3-BMI1|1419|protein_coding|	protein_coding	0.593133	0.227926	1.55315	0.00857236
COMMD4	ENST00000562610.5|ENSG00000140365.15|OTTHUMG00000142823.5|OTTHUMT00000419807.1|COMMD4-206|COMMD4|850|nonsense_mediated_decay|	nonsense_mediated_decay	0.589669	0.057826	-1.53958	0.00882135
COMMD4	ENST00000267935.12|ENSG00000140365.15|OTTHUMG00000142823.5|OTTHUMT00000286414.1|COMMD4-201|COMMD4|1067|protein_coding|	protein_coding	-0.296978	0.75557	2.45778	0.00234684
COMMD4	ENST00000569245.5|ENSG00000140365.15|OTTHUMG00000142823.5|OTTHUMT00000419824.1|COMMD4-225|COMMD4|867|retained_intron|	retained_intron	-0.766002	0.144895	1.40064	0.00750344
COMMD6	ENST00000377612.8|ENSG00000188243.12|OTTHUMG00000017089.4|OTTHUMT00000276465.2|COMMD6-202|COMMD6|580|nonsense_mediated_decay|	nonsense_mediated_decay	1.05284	0.0452572	1.41585	0.0460791
COPB2	ENST00000514508.1|ENSG00000184432.9|OTTHUMG00000159959.4|OTTHUMT00000358501.2|COPB2-212|COPB2|635|protein_coding|	protein_coding	1.01975	6.57221e-09	0.547271	0.043937
COPS7A	ENST00000538753.5|ENSG00000111652.9|OTTHUMG00000169182.3|OTTHUMT00000402763.2|COPS7A-209|COPS7A|754|protein_coding|	protein_coding	0.799068	0.287071	2.51339	0.00124442
COPS7A	ENST00000538375.5|ENSG00000111652.9|OTTHUMG00000169182.3|OTTHUMT00000402755.1|COPS7A-207|COPS7A|898|nonsense_mediated_decay|	nonsense_mediated_decay	-0.54844	0.541143	5.19312	1.78314e-13
COPS9	ENST00000403160.4|ENSG00000172428.10|OTTHUMG00000133352.4|OTTHUMT00000326050.3|COPS9-202|COPS9|609|protein_coding|	protein_coding	0.412805	0.270969	1.03891	0.0176786
CORIN	ENST00000508498.5|ENSG00000145244.11|OTTHUMG00000099441.3|OTTHUMT00000361679.1|CORIN-208|CORIN|3200|protein_coding|	protein_coding	-0.706925	0.539468	2.22427	0.0182126
CORIN	ENST00000505754.1|ENSG00000145244.11|OTTHUMG00000099441.3|OTTHUMT00000361682.1|CORIN-206|CORIN|680|retained_intron|	retained_intron	-0.82327	0.143796	1.10895	0.0452688
CORO1A	ENST00000570244.5|ENSG00000102879.15|OTTHUMG00000132148.2|OTTHUMT00000434067.1|CORO1A-217|CORO1A|844|protein_coding|	protein_coding	1.69285	0.0441742	2.17624	0.0424315
CORO1B	ENST00000627576.2|ENSG00000172725.13|OTTHUMG00000167775.3|-|CORO1B-210|CORO1B|960|protein_coding|	protein_coding	0.430387	0.567929	2.3247	0.00866237
COX4I1	ENST00000570123.5|ENSG00000131143.8|OTTHUMG00000137649.6|OTTHUMT00000430833.1|COX4I1-218|COX4I1|551|processed_transcript|	processed_transcript	0.960932	0.0266444	1.5195	0.00712767
COX5A	ENST00000567270.5|ENSG00000178741.11|OTTHUMG00000142825.3|OTTHUMT00000420148.1|COX5A-204|COX5A|579|protein_coding|	protein_coding	0.766981	0.0547699	1.50714	0.00249218
COX6B1	ENST00000392201.1|ENSG00000126267.8|OTTHUMG00000048112.5|OTTHUMT00000109483.3|COX6B1-202|COX6B1|435|protein_coding|	protein_coding	0.806088	0.282764	2.35436	0.00451739
CPEB2	ENST00000509684.1|ENSG00000137449.15|OTTHUMG00000090669.2|OTTHUMT00000359346.1|CPEB2-208|CPEB2|635|protein_coding|	protein_coding	0.836543	0.121373	1.76741	0.00725658
CPM	ENST00000547134.5|ENSG00000135678.11|OTTHUMG00000169300.2|OTTHUMT00000403361.1|CPM-205|CPM|536|nonsense_mediated_decay|	nonsense_mediated_decay	0.222917	0.750467	-1.98503	0.0435178
CPM	ENST00000551897.5|ENSG00000135678.11|OTTHUMG00000169300.2|OTTHUMT00000403354.1|CPM-213|CPM|655|protein_coding|	protein_coding	-0.337624	0.43582	-2.15547	0.0159018
CPNE1	ENST00000486021.5|ENSG00000214078.12|OTTHUMG00000032356.33|OTTHUMT00000127282.1|CPNE1-226|CPNE1|506|retained_intron|	retained_intron	0.278976	0.169987	-2.79905	6.3443e-09
CPNE1	ENST00000434795.5|ENSG00000214078.12|OTTHUMG00000032356.33|OTTHUMT00000078921.2|CPNE1-213|CPNE1|831|protein_coding|	protein_coding	0.0779771	0.842943	-1.49773	0.0220472
CPNE2	ENST00000565766.1|ENSG00000140848.16|OTTHUMG00000133471.5|OTTHUMT00000433017.2|CPNE2-203|CPNE2|844|protein_coding|	protein_coding	-0.891868	0.0747968	-2.89712	0.0128895
CPOX	ENST00000510489.1|ENSG00000080819.6|OTTHUMG00000160016.3|OTTHUMT00000358903.1|CPOX-202|CPOX|526|retained_intron|	retained_intron	-0.138679	0.650715	-1.24211	0.00870647
CPQ	ENST00000522617.3|ENSG00000104324.15|OTTHUMG00000164690.4|OTTHUMT00000380610.1|CPQ-206|CPQ|466|protein_coding|	protein_coding	-2.40933	0.000358026	1.72179	0.000905492
CPT1A	ENST00000539743.5|ENSG00000110090.12|OTTHUMG00000167892.5|OTTHUMT00000396854.2|CPT1A-205|CPT1A|2382|protein_coding|	protein_coding	1.71776	0.0368587	2.80017	0.00543464
CPT2	ENST00000636239.1|ENSG00000157184.6|OTTHUMG00000008942.4|OTTHUMT00000489824.2|CPT2-205|CPT2|2579|nonsense_mediated_decay|	nonsense_mediated_decay	0.393724	0.712849	2.62237	0.00592556
CRACR2B	ENST00000533803.1|ENSG00000177685.16|OTTHUMG00000165267.7|OTTHUMT00000383090.2|CRACR2B-212|CRACR2B|742|protein_coding|	protein_coding	-2.34178	6.35746e-08	-1.55194	0.00727065
CREB5	ENST00000426500.5|ENSG00000146592.16|OTTHUMG00000097081.10|OTTHUMT00000327950.2|CREB5-207|CREB5|753|protein_coding|	protein_coding	0.504563	0.361057	2.04899	0.000176964
CREBZF	ENST00000528561.5|ENSG00000137504.13|OTTHUMG00000133648.5|OTTHUMT00000390802.1|CREBZF-206|CREBZF|1099|retained_intron|	retained_intron	0.371646	0.505841	-1.76035	0.026154
CREBZF	ENST00000260058.9|ENSG00000137504.13|OTTHUMG00000133648.5|OTTHUMT00000390803.1|CREBZF-201|CREBZF|1431|nonsense_mediated_decay|	nonsense_mediated_decay	-0.29822	0.668392	1.6126	0.0113259
CRELD2	ENST00000444954.1|ENSG00000184164.14|OTTHUMG00000150292.5|OTTHUMT00000317419.2|CRELD2-205|CRELD2|598|processed_transcript|	processed_transcript	0.800065	0.175793	2.57354	9.32569e-06
CRIP1	ENST00000409393.6|ENSG00000213145.9|OTTHUMG00000029908.4|OTTHUMT00000335465.2|CRIP1-203|CRIP1|677|protein_coding|	protein_coding	-2.00373	2.86483e-05	1.06909	0.012375
CRIP2	ENST00000551836.5|ENSG00000182809.10|OTTHUMG00000029906.5|OTTHUMT00000409077.1|CRIP2-210|CRIP2|627|retained_intron|	retained_intron	-0.365357	0.48931	1.52424	0.00487228
CRMP1	ENST00000506216.5|ENSG00000072832.14|OTTHUMG00000125489.2|OTTHUMT00000358873.1|CRMP1-203|CRMP1|1876|processed_transcript|	processed_transcript	-0.119608	0.873849	3.08297	3.41479e-06
CROCC	ENST00000465021.5|ENSG00000058453.16|OTTHUMG00000002200.9|OTTHUMT00000006589.1|CROCC-203|CROCC|780|processed_transcript|	processed_transcript	-0.308367	0.498673	1.12144	0.0113002
CRYAB	ENST00000533879.1|ENSG00000109846.7|OTTHUMG00000166885.3|OTTHUMT00000391668.2|CRYAB-214|CRYAB|479|protein_coding|	protein_coding	-1.17763	7.66726e-10	-0.761196	0.00346626
CTBP1	ENST00000504092.5|ENSG00000159692.15|OTTHUMG00000089259.9|OTTHUMT00000359466.1|CTBP1-205|CTBP1|920|protein_coding|	protein_coding	0.415599	0.635242	1.92723	0.0430416
CTBP1	ENST00000514596.1|ENSG00000159692.15|OTTHUMG00000089259.9|OTTHUMT00000359472.1|CTBP1-215|CTBP1|648|retained_intron|	retained_intron	-0.102913	0.925118	3.25348	7.98137e-05
CTDSP1	ENST00000464255.1|ENSG00000144579.7|OTTHUMG00000133109.3|OTTHUMT00000338203.1|CTDSP1-206|CTDSP1|926|processed_transcript|	processed_transcript	-0.208327	0.486622	1.13733	0.000313818
CTNNBIP1	ENST00000377258.5|ENSG00000178585.14|OTTHUMG00000001796.1|OTTHUMT00000005014.1|CTNNBIP1-202|CTNNBIP1|852|protein_coding|	protein_coding	1.4713	4.64193e-07	-1.24403	0.042528
CTNNBIP1	ENST00000400904.7|ENSG00000178585.14|OTTHUMG00000001796.1|OTTHUMT00000005013.1|CTNNBIP1-204|CTNNBIP1|1206|protein_coding|	protein_coding	1.28227	4.96318e-12	-1.44111	1.43967e-05
CTNNBL1	ENST00000621317.4|ENSG00000132792.18|OTTHUMG00000032428.5|-|CTNNBL1-209|CTNNBL1|1990|protein_coding|	protein_coding	-0.26671	0.698879	2.70156	0.000102596
CTNND1	ENST00000526938.5|ENSG00000198561.13|OTTHUMG00000167272.5|OTTHUMT00000394345.1|CTNND1-215|CTNND1|3489|protein_coding|	protein_coding	4.2258	8.5951e-06	3.05135	0.0404714
CTNND1	ENST00000534647.1|ENSG00000198561.13|OTTHUMG00000167272.5|OTTHUMT00000394348.2|CTNND1-238|CTNND1|866|protein_coding|	protein_coding	1.20981	0.000227247	1.22254	0.00868116
CTNND1	ENST00000533667.5|ENSG00000198561.13|OTTHUMG00000167272.5|OTTHUMT00000393951.1|CTNND1-236|CTNND1|4990|protein_coding|	protein_coding	-1.13768	0.0180578	-1.62919	0.0294718
CTSA	ENST00000480961.1|ENSG00000064601.16|OTTHUMG00000033078.15|OTTHUMT00000080505.1|CTSA-206|CTSA|513|retained_intron|	retained_intron	0.690205	0.0422141	1.54464	0.000148986
CTSB	ENST00000531551.5|ENSG00000164733.20|OTTHUMG00000090799.9|OTTHUMT00000383691.1|CTSB-222|CTSB|1855|nonsense_mediated_decay|	nonsense_mediated_decay	0.289115	0.533524	-5.70459	5.43406e-05
CTSB	ENST00000526481.6|ENSG00000164733.20|OTTHUMG00000090799.9|OTTHUMT00000468131.1|CTSB-211|CTSB|660|nonsense_mediated_decay|	nonsense_mediated_decay	-2.20355	0.000392125	-3.85176	0.0169977
CTSB	ENST00000530640.6|ENSG00000164733.20|OTTHUMG00000090799.9|OTTHUMT00000383687.2|CTSB-219|CTSB|1389|protein_coding|	protein_coding	4.1651	0.000863313	4.47163	0.00558593
CTSB	ENST00000525076.5|ENSG00000164733.20|OTTHUMG00000090799.9|OTTHUMT00000383700.1|CTSB-208|CTSB|550|processed_transcript|	processed_transcript	0.877777	0.165806	2.15815	0.0119748
CTSD	ENST00000637937.1|ENSG00000117984.13|OTTHUMG00000044760.23|OTTHUMT00000489876.1|CTSD-214|CTSD|1262|processed_transcript|	processed_transcript	-1.56636	0.166352	2.19763	0.0355159
CU633904.1	ENST00000624461.3|ENSG00000276077.4|OTTHUMG00000189371.1|OTTHUMT00000479486.1|CU633904.1-205|CU633904.1|994|lincRNA|	lincRNA	-0.933738	0.145128	-2.43935	0.029121
CUEDC1	ENST00000407144.6|ENSG00000180891.12|OTTHUMG00000178775.3|OTTHUMT00000443307.1|CUEDC1-202|CUEDC1|2190|protein_coding|	protein_coding	0.254084	0.675831	-3.66872	0.010598
CUL4A	ENST00000472083.1|ENSG00000139842.14|OTTHUMG00000017384.5|OTTHUMT00000045895.1|CUL4A-207|CUL4A|574|processed_transcript|	processed_transcript	0.0929306	0.850381	-2.87087	0.0096547
CUL4A	ENST00000470067.5|ENSG00000139842.14|OTTHUMG00000017384.5|OTTHUMT00000045894.1|CUL4A-206|CUL4A|794|processed_transcript|	processed_transcript	-0.227448	0.694435	1.36269	0.0109042
CUX1	ENST00000292535.11|ENSG00000257923.9|OTTHUMG00000157129.7|OTTHUMT00000347535.1|CUX1-201|CUX1|13747|protein_coding|	protein_coding	1.24683	0.0635392	2.36872	0.00486411
CWH43	ENST00000513409.1|ENSG00000109182.11|OTTHUMG00000128627.7|OTTHUMT00000361404.2|CWH43-204|CWH43|2390|protein_coding|	protein_coding	1.47923	3.03483e-05	-1.75858	0.028454
CXCL14	ENST00000337225.5|ENSG00000145824.12|OTTHUMG00000129139.4|-|CXCL14-201|CXCL14|1971|protein_coding|	protein_coding	-0.752661	0.00178696	1.44841	6.64283e-09
CXCR2	ENST00000318507.6|ENSG00000180871.7|OTTHUMG00000133107.3|OTTHUMT00000256772.2|CXCR2-201|CXCR2|2879|protein_coding|	protein_coding	2.65137	1.38065e-51	0.421105	0.0348813
CXorf40B	ENST00000462691.5|ENSG00000197021.8|OTTHUMG00000034327.5|OTTHUMT00000083080.1|CXorf40B-205|CXorf40B|1440|protein_coding|	protein_coding	1.29848	5.95808e-13	0.560562	0.0421673
CXXC1	ENST00000586144.1|ENSG00000154832.14|OTTHUMG00000132670.11|OTTHUMT00000448624.1|CXXC1-203|CXXC1|474|retained_intron|	retained_intron	-0.108716	0.748805	-1.08289	0.0498142
CYB561A3	ENST00000542361.5|ENSG00000162144.9|OTTHUMG00000157187.8|OTTHUMT00000398721.2|CYB561A3-217|CYB561A3|650|protein_coding|	protein_coding	0.0285567	0.959787	1.38828	0.00993938
CYB5R2	ENST00000533558.5|ENSG00000166394.14|OTTHUMG00000165665.2|OTTHUMT00000385679.1|CYB5R2-212|CYB5R2|1658|protein_coding|	protein_coding	3.7965	5.82839e-20	1.86291	0.00265054
CYB5R2	ENST00000527542.5|ENSG00000166394.14|OTTHUMG00000165665.2|OTTHUMT00000385686.2|CYB5R2-207|CYB5R2|611|protein_coding|	protein_coding	1.74357	1.84667e-12	-1.63934	0.0101385
CYB5R4	ENST00000479164.1|ENSG00000065615.13|OTTHUMG00000015118.5|OTTHUMT00000041363.1|CYB5R4-203|CYB5R4|764|processed_transcript|	processed_transcript	1.16443	6.39459e-32	-0.284384	0.042107
CYP20A1	ENST00000461371.5|ENSG00000119004.15|OTTHUMG00000132854.13|OTTHUMT00000336103.2|CYP20A1-207|CYP20A1|1359|processed_transcript|	processed_transcript	0.115052	0.682308	-1.41194	0.000694682
CYP39A1	ENST00000275016.2|ENSG00000146233.7|OTTHUMG00000014785.1|OTTHUMT00000040787.1|CYP39A1-201|CYP39A1|2176|protein_coding|	protein_coding	-1.24974	3.01395e-25	-0.369202	0.00599021
CYP4B1	ENST00000468637.3|ENSG00000142973.13|OTTHUMG00000007984.8|OTTHUMT00000021915.3|CYP4B1-207|CYP4B1|919|retained_intron|	retained_intron	-0.493447	0.405621	-1.76937	0.0413438
CYP4F22	ENST00000601005.2|ENSG00000171954.12|OTTHUMG00000182451.2|-|CYP4F22-202|CYP4F22|2445|protein_coding|	protein_coding	-0.360444	0.829101	5.86191	4.59939e-07
CYP51A1	ENST00000422867.1|ENSG00000001630.15|OTTHUMG00000131131.6|OTTHUMT00000342058.1|CYP51A1-202|CYP51A1|747|protein_coding|	protein_coding	-0.548103	0.328596	-1.64146	0.0474695
CSDE1	ENST00000525878.5|ENSG00000009307.15|OTTHUMG00000012060.5|OTTHUMT00000392613.2|CSDE1-210|CSDE1|626|protein_coding|	protein_coding	1.01371	0.0395407	-1.81518	0.0242898
CSDE1	ENST00000610726.4|ENSG00000009307.15|OTTHUMG00000012060.5|-|CSDE1-218|CSDE1|4312|protein_coding|	protein_coding	0.328125	0.67186	2.54208	0.000219807
CSDE1	ENST00000369530.5|ENSG00000009307.15|OTTHUMG00000012060.5|OTTHUMT00000033399.2|CSDE1-204|CSDE1|3774|protein_coding|	protein_coding	-2.12592	0.00674525	-3.30844	0.0395798
CSGALNACT1	ENST00000522854.5|ENSG00000147408.14|OTTHUMG00000130827.5|OTTHUMT00000375206.2|CSGALNACT1-211|CSGALNACT1|1990|protein_coding|	protein_coding	0.844303	0.143828	1.61916	0.0292768
CSK	ENST00000569462.5|ENSG00000103653.16|OTTHUMG00000142814.5|OTTHUMT00000421507.2|CSK-213|CSK|534|protein_coding|	protein_coding	2.98548	1.28378e-06	2.33333	0.010317
CSNK1E	ENST00000498529.5|ENSG00000213923.11|OTTHUMG00000151135.4|OTTHUMT00000321474.1|CSNK1E-214|CSNK1E|381|processed_transcript|	processed_transcript	-1.18206	0.0417798	-3.31581	0.000214575
CSRP1	ENST00000524951.5|ENSG00000159176.13|OTTHUMG00000035773.4|OTTHUMT00000382284.2|CSRP1-206|CSRP1|582|protein_coding|	protein_coding	-0.990949	0.0560621	1.662	0.00128041
CSRP1	ENST00000526256.5|ENSG00000159176.13|OTTHUMG00000035773.4|OTTHUMT00000382279.2|CSRP1-207|CSRP1|582|protein_coding|	protein_coding	-1.80493	0.047416	2.44045	0.00235997
CSRP1	ENST00000367306.5|ENSG00000159176.13|OTTHUMG00000035773.4|OTTHUMT00000087027.1|CSRP1-202|CSRP1|2129|protein_coding|	protein_coding	-2.00505	2.66463e-06	1.44037	7.65165e-06
CST3	ENST00000398409.1|ENSG00000101439.8|OTTHUMG00000032080.3|OTTHUMT00000256832.1|CST3-202|CST3|832|protein_coding|	protein_coding	1.49889	0.0105213	2.19579	0.00530275
DAB2IP	ENST00000309989.1|ENSG00000136848.16|OTTHUMG00000020595.4|OTTHUMT00000053898.1|DAB2IP-202|DAB2IP|3500|protein_coding|	protein_coding	-0.338749	0.676966	2.57486	5.20114e-05
DACT2	ENST00000610183.1|ENSG00000164488.11|OTTHUMG00000016046.2|OTTHUMT00000471576.1|DACT2-204|DACT2|2088|protein_coding|	protein_coding	-0.0498793	0.958679	1.75817	0.0402972
DACT3	ENST00000391916.6|ENSG00000197380.10|OTTHUMG00000153070.3|OTTHUMT00000334090.1|DACT3-202|DACT3|2834|protein_coding|	protein_coding	-1.16863	0.0100698	1.14194	0.0212603
DACT3	ENST00000300875.4|ENSG00000197380.10|OTTHUMG00000153070.3|OTTHUMT00000329345.1|DACT3-201|DACT3|2526|protein_coding|	protein_coding	-1.445	0.0103168	-2.36183	0.0390838
DAP3	ENST00000463295.1|ENSG00000132676.15|OTTHUMG00000035439.5|OTTHUMT00000086070.2|DAP3-207|DAP3|607|protein_coding|	protein_coding	-0.544338	0.531008	2.75548	2.40234e-05
DBNL	ENST00000440166.5|ENSG00000136279.20|OTTHUMG00000155350.5|OTTHUMT00000339575.2|DBNL-207|DBNL|1415|protein_coding|	protein_coding	1.46645	0.122479	2.24734	0.0476533
DCAF12	ENST00000396990.6|ENSG00000198876.12|OTTHUMG00000019806.3|OTTHUMT00000052136.2|DCAF12-202|DCAF12|803|protein_coding|	protein_coding	1.2563	0.0607409	1.74795	0.0386179
DCAF17	ENST00000375255.7|ENSG00000115827.13|OTTHUMG00000132259.2|OTTHUMT00000255342.2|DCAF17-202|DCAF17|5828|protein_coding|	protein_coding	-1.2545	0.0309148	-2.22138	0.0313864
DCAKD	ENST00000588499.5|ENSG00000172992.11|OTTHUMG00000179947.3|OTTHUMT00000449068.1|DCAKD-205|DCAKD|990|protein_coding|	protein_coding	-1.33291	0.0359584	2.67898	3.27118e-06
DCN	ENST00000548768.1|ENSG00000011465.16|OTTHUMG00000169998.6|OTTHUMT00000406803.1|DCN-213|DCN|568|processed_transcript|	processed_transcript	-1.18289	1.22391e-06	-1.32081	0.000215225
DCP1A	ENST00000294241.10|ENSG00000272886.5|OTTHUMG00000158193.7|OTTHUMT00000350476.2|DCP1A-201|DCP1A|1853|protein_coding|	protein_coding	0.439015	0.45533	1.41052	0.0352069
DCTN6	ENST00000522141.5|ENSG00000104671.7|OTTHUMG00000163828.2|OTTHUMT00000375849.1|DCTN6-204|DCTN6|820|nonsense_mediated_decay|	nonsense_mediated_decay	1.12538	0.000808555	-1.47392	0.0464352
DCXR	ENST00000579004.1|ENSG00000169738.7|OTTHUMG00000178483.4|OTTHUMT00000442219.1|DCXR-208|DCXR|341|protein_coding|	protein_coding	-0.333379	0.28143	-1.76054	0.000545673
DDAH2	ENST00000436437.1|ENSG00000213722.8|OTTHUMG00000031212.6|OTTHUMT00000076437.3|DDAH2-215|DDAH2|882|protein_coding|	protein_coding	-2.09143	0.00107508	2.26876	8.93569e-06
DDB2	ENST00000378603.7|ENSG00000134574.11|OTTHUMG00000187453.6|OTTHUMT00000475006.1|DDB2-204|DDB2|1092|protein_coding|	protein_coding	-0.149778	0.862583	1.66966	0.0335752
DDR1	ENST00000376568.7|ENSG00000204580.13|OTTHUMG00000031236.13|OTTHUMT00000076492.3|DDR1-225|DDR1|3894|protein_coding|	protein_coding	0.0907416	0.941814	2.12168	0.0497345
DDR1	ENST00000484556.1|ENSG00000204580.13|OTTHUMG00000031236.13|OTTHUMT00000257570.2|DDR1-245|DDR1|1038|protein_coding|	protein_coding	-1.29022	0.0104086	1.49224	0.00327968
DDRGK1	ENST00000470203.1|ENSG00000198171.12|OTTHUMG00000031732.2|OTTHUMT00000077711.1|DDRGK1-203|DDRGK1|480|processed_transcript|	processed_transcript	-0.744232	0.249693	-2.6392	0.00734683
DDX19A	ENST00000569771.5|ENSG00000168872.16|OTTHUMG00000137579.5|OTTHUMT00000435152.1|DDX19A-214|DDX19A|3067|nonsense_mediated_decay|	nonsense_mediated_decay	-0.672699	0.351433	1.40258	0.0381614
DDX19B	ENST00000566216.5|ENSG00000157349.16|OTTHUMG00000137577.6|OTTHUMT00000435141.1|DDX19B-209|DDX19B|726|protein_coding|	protein_coding	0.574573	0.404638	-3.06848	0.00437867
DDX19B	ENST00000568460.5|ENSG00000157349.16|OTTHUMG00000137577.6|OTTHUMT00000435145.1|DDX19B-212|DDX19B|586|nonsense_mediated_decay|	nonsense_mediated_decay	1.18986	0.0194975	1.78813	0.00568889
DDX24	ENST00000555054.1|ENSG00000089737.16|OTTHUMG00000171301.2|OTTHUMT00000412863.1|DDX24-205|DDX24|2769|protein_coding|	protein_coding	1.08424	0.298422	3.0058	0.00772642
DDX24	ENST00000544005.5|ENSG00000089737.16|OTTHUMG00000171301.2|OTTHUMT00000412862.1|DDX24-202|DDX24|2214|protein_coding|	protein_coding	-0.477693	0.689492	3.51804	3.13272e-05
DDX27	ENST00000622530.4|ENSG00000124228.14|OTTHUMG00000033072.5|-|DDX27-207|DDX27|2693|protein_coding|	protein_coding	-0.295279	0.798523	3.5056	0.000109474
DDX39A	ENST00000592391.5|ENSG00000123136.14|OTTHUMG00000182181.4|OTTHUMT00000459882.2|DDX39A-217|DDX39A|1080|retained_intron|	retained_intron	0.105653	0.874484	-2.32377	0.00635297
DDX39B	ENST00000427214.5|ENSG00000198563.13|OTTHUMG00000031165.9|OTTHUMT00000076306.7|DDX39B-207|DDX39B|1005|protein_coding|	protein_coding	1.90284	0.00509227	2.9209	0.000416943
DDX3X	ENST00000457138.6|ENSG00000215301.9|OTTHUMG00000021369.14|-|DDX3X-203|DDX3X|5346|protein_coding|	protein_coding	-1.50665	0.0480814	-2.93035	0.0240915
DDX41	ENST00000629036.2|ENSG00000183258.11|OTTHUMG00000130858.2|-|DDX41-219|DDX41|606|protein_coding|	protein_coding	1.09816	0.178178	4.03721	5.83154e-08
DDX46	ENST00000628477.2|ENSG00000145833.15|OTTHUMG00000163072.1|-|DDX46-212|DDX46|1584|protein_coding|	protein_coding	1.32033	0.0714803	1.94171	0.043347
DDX5	ENST00000578758.5|ENSG00000108654.13|OTTHUMG00000178936.9|OTTHUMT00000445045.1|DDX5-209|DDX5|667|retained_intron|	retained_intron	-0.208323	0.538412	-2.03467	0.000202684
DDX5	ENST00000578804.5|ENSG00000108654.13|OTTHUMG00000178936.9|OTTHUMT00000444032.1|DDX5-210|DDX5|2021|protein_coding|	protein_coding	0.0885866	0.869156	-2.51331	0.00579511
DDX5	ENST00000540698.6|ENSG00000108654.13|OTTHUMG00000178936.9|OTTHUMT00000444027.1|DDX5-203|DDX5|2225|nonsense_mediated_decay|	nonsense_mediated_decay	2.44421	0.0029608	4.32717	4.28688e-06
DDX55	ENST00000544738.5|ENSG00000111364.15|OTTHUMG00000168695.2|OTTHUMT00000400618.1|DDX55-212|DDX55|956|nonsense_mediated_decay|	nonsense_mediated_decay	0.0453814	0.949299	1.38491	0.0272947
DEAF1	ENST00000525904.5|ENSG00000177030.16|OTTHUMG00000165363.7|OTTHUMT00000384121.1|DEAF1-204|DEAF1|797|processed_transcript|	processed_transcript	-0.163906	0.760992	1.19334	0.0191146
DEDD	ENST00000464113.1|ENSG00000158796.16|OTTHUMG00000033104.6|OTTHUMT00000102168.3|DEDD-205|DEDD|964|protein_coding|	protein_coding	0.336349	0.607158	2.32365	0.000186017
DEF8	ENST00000418391.6|ENSG00000140995.16|OTTHUMG00000138989.4|OTTHUMT00000412020.1|DEF8-202|DEF8|852|protein_coding|	protein_coding	0.9265	0.0298559	1.22551	0.0423624
DENND3	ENST00000424248.2|ENSG00000105339.10|OTTHUMG00000164775.12|-|DENND3-202|DENND3|4740|protein_coding|	protein_coding	0.212918	0.83123	2.24082	0.0108987
DEPTOR	ENST00000523492.5|ENSG00000155792.9|OTTHUMG00000165052.1|OTTHUMT00000381600.1|DEPTOR-203|DEPTOR|1397|protein_coding|	protein_coding	-0.996305	0.0547642	1.4663	0.00235997
DES	ENST00000477226.5|ENSG00000175084.11|OTTHUMG00000058924.2|OTTHUMT00000130245.1|DES-202|DES|760|retained_intron|	retained_intron	-2.21702	0.0177438	1.83037	0.0260176
DFFA	ENST00000476658.5|ENSG00000160049.11|OTTHUMG00000001909.3|OTTHUMT00000005420.2|DFFA-203|DFFA|744|nonsense_mediated_decay|	nonsense_mediated_decay	1.81312	3.39239e-13	0.821051	0.0287686
DGAT1	ENST00000524844.1|ENSG00000185000.11|OTTHUMG00000174606.3|OTTHUMT00000427006.1|DGAT1-202|DGAT1|401|processed_transcript|	processed_transcript	1.06832	0.0124844	-2.04997	0.0390802
DGCR2	ENST00000608548.1|ENSG00000070413.19|OTTHUMG00000150141.2|OTTHUMT00000472499.1|DGCR2-207|DGCR2|518|processed_transcript|	processed_transcript	0.144239	0.731633	-1.3502	0.0379499
DHCR24	ENST00000535035.5|ENSG00000116133.11|OTTHUMG00000009989.1|-|DHCR24-203|DHCR24|4153|protein_coding|	protein_coding	-1.90736	0.0143799	-4.63553	0.0152388
DHRS4	ENST00000558581.5|ENSG00000157326.18|OTTHUMG00000028777.5|OTTHUMT00000416567.1|DHRS4-206|DHRS4|1143|protein_coding|	protein_coding	0.785248	0.369616	2.11889	0.0341655
DHX30	ENST00000619982.4|ENSG00000132153.14|OTTHUMG00000133522.2|-|DHX30-215|DHX30|3574|protein_coding|	protein_coding	0.582843	0.019732	1.02832	0.00202845
DHX33	ENST00000572490.1|ENSG00000005100.12|OTTHUMG00000102041.2|OTTHUMT00000439397.1|DHX33-203|DHX33|2564|protein_coding|	protein_coding	2.67358	0.000102714	2.70351	0.00293982
DHX40	ENST00000425628.7|ENSG00000108406.9|OTTHUMG00000179401.3|OTTHUMT00000446098.1|DHX40-202|DHX40|2255|protein_coding|	protein_coding	1.90554	0.0244123	2.55665	0.017576
DHX58	ENST00000589979.1|ENSG00000108771.12|OTTHUMG00000133493.3|OTTHUMT00000449776.1|DHX58-205|DHX58|782|nonsense_mediated_decay|	nonsense_mediated_decay	-0.237439	0.60932	-2.0324	0.020731
DIAPH1	ENST00000468119.3|ENSG00000131504.15|OTTHUMG00000149893.9|OTTHUMT00000313779.2|DIAPH1-206|DIAPH1|619|processed_transcript|	processed_transcript	0.510425	0.60881	3.39051	5.93999e-05
DIP2C	ENST00000280886.11|ENSG00000151240.16|OTTHUMG00000017532.5|OTTHUMT00000046389.2|DIP2C-201|DIP2C|7888|protein_coding|	protein_coding	0.283545	0.774749	2.20377	0.0247338
DIS3L2	ENST00000418143.1|ENSG00000144535.19|OTTHUMG00000153385.3|OTTHUMT00000330985.1|DIS3L2-207|DIS3L2|843|protein_coding|	protein_coding	0.17624	0.791312	1.65701	0.00857075
DIXDC1	ENST00000526500.5|ENSG00000150764.13|OTTHUMG00000166912.3|OTTHUMT00000391839.1|DIXDC1-203|DIXDC1|1350|retained_intron|	retained_intron	-0.446823	0.530394	1.55684	0.0160763
DKC1	ENST00000426673.5|ENSG00000130826.17|OTTHUMG00000024242.10|OTTHUMT00000061184.5|DKC1-204|DKC1|843|nonsense_mediated_decay|	nonsense_mediated_decay	0.0384402	0.964867	2.65646	2.17538e-05
DLC1	ENST00000358919.6|ENSG00000164741.14|OTTHUMG00000090825.9|OTTHUMT00000207634.1|DLC1-203|DLC1|4392|protein_coding|	protein_coding	-0.131893	0.893893	1.73792	0.046434
DLGAP4	ENST00000489701.5|ENSG00000080845.17|OTTHUMG00000032390.6|OTTHUMT00000354578.2|DLGAP4-213|DLGAP4|2396|protein_coding|	protein_coding	-1.26906	2.18784e-05	0.672181	0.0341094
DMD	ENST00000620040.4|ENSG00000198947.15|OTTHUMG00000021336.7|-|DMD-230|DMD|13746|protein_coding|	protein_coding	-0.166071	0.807972	-1.95178	0.034559
DMD	ENST00000619831.4|ENSG00000198947.15|OTTHUMG00000021336.7|-|DMD-229|DMD|13734|protein_coding|	protein_coding	-0.309138	0.690988	-2.40459	0.0291683
DMKN	ENST00000478648.6|ENSG00000161249.20|OTTHUMG00000048101.17|OTTHUMT00000340123.2|DMKN-243|DMKN|768|retained_intron|	retained_intron	-0.989312	0.134461	-2.35031	0.0207195
DMKN	ENST00000602679.5|ENSG00000161249.20|OTTHUMG00000048101.17|OTTHUMT00000467293.3|DMKN-267|DMKN|557|protein_coding|	protein_coding	2.09097	0.0337471	3.94578	0.000507246
DMKN	ENST00000601368.5|ENSG00000161249.20|OTTHUMG00000048101.17|OTTHUMT00000467102.1|DMKN-265|DMKN|752|retained_intron|	retained_intron	-1.03115	0.00756581	0.986651	0.0192366
DMPK	ENST00000596920.1|ENSG00000104936.17|OTTHUMG00000182334.3|OTTHUMT00000461646.1|DMPK-211|DMPK|382|processed_transcript|	processed_transcript	-0.187317	0.687066	1.26639	0.00275833
DMTN	ENST00000415253.5|ENSG00000158856.18|OTTHUMG00000097087.7|OTTHUMT00000375180.3|DMTN-204|DMTN|2394|protein_coding|	protein_coding	1.22419	0.264729	4.06219	3.26055e-05
DNAJB2	ENST00000470530.1|ENSG00000135924.15|OTTHUMG00000133134.22|OTTHUMT00000335660.1|DNAJB2-209|DNAJB2|728|processed_transcript|	processed_transcript	-0.0415047	0.948246	1.73746	0.000553507
DNAJB2	ENST00000476254.1|ENSG00000135924.15|OTTHUMG00000133134.22|OTTHUMT00000335659.1|DNAJB2-212|DNAJB2|486|retained_intron|	retained_intron	0.397486	0.633659	3.06946	3.97417e-05
DNAJB6	ENST00000443280.5|ENSG00000105993.14|OTTHUMG00000157242.6|OTTHUMT00000348125.1|DNAJB6-209|DNAJB6|1159|protein_coding|	protein_coding	1.61984	0.0135362	2.61281	0.00110881
DNAJB6	ENST00000488001.5|ENSG00000105993.14|OTTHUMG00000157242.6|OTTHUMT00000348141.1|DNAJB6-217|DNAJB6|551|processed_transcript|	processed_transcript	-2.39374	0.010134	1.48499	0.0463794
DNAJC7	ENST00000426588.7|ENSG00000168259.14|OTTHUMG00000180862.4|OTTHUMT00000453368.1|DNAJC7-202|DNAJC7|1774|protein_coding|	protein_coding	0.378415	0.632069	2.23904	0.00468274
DNASE1L1	ENST00000497242.1|ENSG00000013563.13|OTTHUMG00000033188.29|OTTHUMT00000081632.2|DNASE1L1-212|DNASE1L1|892|retained_intron|	retained_intron	-0.22969	0.612945	1.37951	0.000669506
DNASE1L2	ENST00000613572.4|ENSG00000167968.12|OTTHUMG00000177086.2|-|DNASE1L2-206|DNASE1L2|1260|protein_coding|	protein_coding	-1.09374	0.305892	1.96256	0.0273555
DNM2	ENST00000359692.10|ENSG00000079805.16|OTTHUMG00000180694.3|OTTHUMT00000452591.1|DNM2-202|DNM2|3588|protein_coding|	protein_coding	0.2191	0.697201	-2.67632	0.0336806
DNM2	ENST00000408974.8|ENSG00000079805.16|OTTHUMG00000180694.3|OTTHUMT00000452593.1|DNM2-204|DNM2|3013|protein_coding|	protein_coding	-0.783077	0.552843	4.09048	5.61264e-05
DNMT3A	ENST00000402667.1|ENSG00000119772.16|OTTHUMG00000094777.6|OTTHUMT00000325149.2|DNMT3A-205|DNMT3A|2300|protein_coding|	protein_coding	0.896391	0.20322	2.50392	0.000861096
DNPEP	ENST00000490371.5|ENSG00000123992.18|OTTHUMG00000058919.6|OTTHUMT00000130221.2|DNPEP-214|DNPEP|555|processed_transcript|	processed_transcript	-0.586915	0.320442	-1.75506	0.0492874
DNPEP	ENST00000523282.5|ENSG00000123992.18|OTTHUMG00000058919.6|OTTHUMT00000380517.2|DNPEP-220|DNPEP|1662|protein_coding|	protein_coding	0.676998	0.0362924	1.09774	0.0127564
DNPEP	ENST00000373963.5|ENSG00000123992.18|OTTHUMG00000058919.6|OTTHUMT00000130213.3|DNPEP-203|DNPEP|1657|nonsense_mediated_decay|	nonsense_mediated_decay	1.55099	0.00776846	1.71083	0.0405007
DNTTIP2	ENST00000460191.1|ENSG00000067334.13|OTTHUMG00000010268.6|OTTHUMT00000028318.1|DNTTIP2-203|DNTTIP2|3084|processed_transcript|	processed_transcript	0.6359	0.0633704	1.08264	0.0190503
DOPEY1	ENST00000369739.7|ENSG00000083097.14|OTTHUMG00000016365.4|OTTHUMT00000469973.1|DOPEY1-203|DOPEY1|7743|protein_coding|	protein_coding	-1.26166	0.274768	2.5517	0.0115253
DPCD	ENST00000370147.5|ENSG00000166171.12|OTTHUMG00000018934.2|OTTHUMT00000049959.1|DPCD-201|DPCD|641|protein_coding|	protein_coding	1.71373	0.00161072	1.67503	0.043177
DPEP1	ENST00000261615.5|ENSG00000015413.9|OTTHUMG00000138052.4|OTTHUMT00000269930.3|DPEP1-201|DPEP1|1592|protein_coding|	protein_coding	-0.330209	0.621632	1.53195	0.0345799
DPP3	ENST00000526515.5|ENSG00000254986.7|OTTHUMG00000167143.6|OTTHUMT00000393427.3|DPP3-203|DPP3|547|protein_coding|	protein_coding	2.12906	1.07205e-08	-1.68969	0.0381732
DPP9	ENST00000601720.5|ENSG00000142002.16|OTTHUMG00000182040.7|OTTHUMT00000458983.1|DPP9-223|DPP9|798|protein_coding|	protein_coding	-0.402771	0.510869	1.23566	0.0457012
DPY19L3	ENST00000608291.1|ENSG00000178904.18|OTTHUMG00000180222.8|OTTHUMT00000472127.1|DPY19L3-212|DPY19L3|546|retained_intron|	retained_intron	1.11729	0.0158183	1.4187	0.0229724
DRAP1	ENST00000525501.5|ENSG00000175550.7|OTTHUMG00000166723.4|OTTHUMT00000391200.3|DRAP1-204|DRAP1|695|protein_coding|	protein_coding	1.07835	0.000480986	0.953974	0.0391946
DRD4	ENST00000176183.5|ENSG00000069696.6|OTTHUMG00000133312.2|OTTHUMT00000257109.1|DRD4-201|DRD4|1375|protein_coding|	protein_coding	-1.33934	5.61584e-07	0.880667	0.000861362
DRG1	ENST00000469673.1|ENSG00000185721.12|OTTHUMG00000030792.11|OTTHUMT00000129110.1|DRG1-204|DRG1|677|retained_intron|	retained_intron	0.552592	0.130306	-1.7333	0.0341223
DRGX	ENST00000374139.6|ENSG00000165606.8|OTTHUMG00000018192.3|OTTHUMT00000047987.3|DRGX-201|DRGX|2738|protein_coding|	protein_coding	-1.68788	1.08657e-07	0.728839	0.0278593
DSN1	ENST00000373734.8|ENSG00000149636.15|OTTHUMG00000032396.5|OTTHUMT00000079051.2|DSN1-201|DSN1|1915|protein_coding|	protein_coding	-1.09778	0.168563	1.83604	0.0301769
DTNB	ENST00000407186.5|ENSG00000138101.18|OTTHUMG00000152129.7|OTTHUMT00000325369.1|DTNB-210|DTNB|2275|protein_coding|	protein_coding	0.820573	0.165452	1.96152	0.00527604
DTWD1	ENST00000558653.5|ENSG00000104047.14|OTTHUMG00000131567.4|OTTHUMT00000418088.1|DTWD1-205|DTWD1|1131|protein_coding|	protein_coding	-0.389897	0.190708	-1.06982	0.0226461
DUOXA1	ENST00000560572.5|ENSG00000140254.12|OTTHUMG00000131352.4|OTTHUMT00000416242.1|DUOXA1-215|DUOXA1|1044|protein_coding|	protein_coding	-0.102922	0.903995	1.90589	0.0053184
DUS1L	ENST00000578176.5|ENSG00000169718.17|OTTHUMG00000178525.3|OTTHUMT00000442361.3|DUS1L-207|DUS1L|937|protein_coding|	protein_coding	1.33967	0.0169371	1.59064	0.0412591
DUS1L	ENST00000577574.5|ENSG00000169718.17|OTTHUMG00000178525.3|OTTHUMT00000442348.1|DUS1L-205|DUS1L|473|protein_coding|	protein_coding	0.481982	0.290612	-3.35239	0.0160333
DUS2	ENST00000561965.1|ENSG00000167264.17|OTTHUMG00000137538.7|OTTHUMT00000432754.1|DUS2-203|DUS2|1712|nonsense_mediated_decay|	nonsense_mediated_decay	1.55286	0.0502068	2.55315	0.00535459
DUS3L	ENST00000590087.1|ENSG00000141994.15|OTTHUMG00000162311.4|OTTHUMT00000451875.1|DUS3L-207|DUS3L|379|retained_intron|	retained_intron	0.514332	0.19307	-2.9048	0.000615755
DUS3L	ENST00000593229.1|ENSG00000141994.15|OTTHUMG00000162311.4|OTTHUMT00000451876.1|DUS3L-215|DUS3L|249|retained_intron|	retained_intron	0.329157	0.541982	2.7348	1.03981e-08
DUSP22	ENST00000603296.5|ENSG00000112679.14|OTTHUMG00000014113.4|OTTHUMT00000470051.2|DUSP22-205|DUSP22|405|protein_coding|	protein_coding	0.214097	0.663185	-2.19836	0.0210868
DUSP6	ENST00000547140.1|ENSG00000139318.7|OTTHUMG00000169912.4|OTTHUMT00000406537.1|DUSP6-203|DUSP6|604|processed_transcript|	processed_transcript	0.941582	0.181602	2.42619	0.00102145
DVL1	ENST00000631679.1|ENSG00000107404.19|OTTHUMG00000003069.4|OTTHUMT00000487901.1|DVL1-205|DVL1|778|protein_coding|	protein_coding	-0.588886	0.366514	1.3846	0.0260953
DVL2	ENST00000575086.1|ENSG00000004975.11|OTTHUMG00000102155.4|OTTHUMT00000440037.2|DVL2-208|DVL2|900|protein_coding|	protein_coding	0.382013	0.552381	1.56001	0.0204292
DYNC1I2	ENST00000445378.5|ENSG00000077380.15|OTTHUMG00000154061.12|OTTHUMT00000334633.1|DYNC1I2-217|DYNC1I2|566|nonsense_mediated_decay|	nonsense_mediated_decay	-1.2862	0.0420945	-2.2518	0.0249195
DYNLL1	ENST00000548342.5|ENSG00000088986.10|OTTHUMG00000169368.4|OTTHUMT00000403711.1|DYNLL1-205|DYNLL1|662|protein_coding|	protein_coding	0.344749	0.346433	1.26463	0.000988708
EDN2	ENST00000372587.4|ENSG00000127129.9|OTTHUMG00000006362.1|OTTHUMT00000016983.1|EDN2-201|EDN2|1241|protein_coding|	protein_coding	-1.08065	0.000302936	0.726962	0.0158887
EDN3	ENST00000371028.6|ENSG00000124205.15|OTTHUMG00000032867.2|-|EDN3-204|EDN3|2397|protein_coding|	protein_coding	-0.540004	0.429094	1.84707	0.0132229
EED	ENST00000263360.10|ENSG00000074266.19|OTTHUMG00000167209.6|OTTHUMT00000393733.1|EED-201|EED|2223|protein_coding|	protein_coding	1.88728	8.82794e-06	1.42491	0.0220114
EEF1A1	ENST00000356303.6|ENSG00000156508.17|OTTHUMG00000015031.6|OTTHUMT00000132694.2|EEF1A1-204|EEF1A1|635|protein_coding|	protein_coding	-0.408422	0.453025	-2.42173	0.0150846
EEF1A1	ENST00000490569.5|ENSG00000156508.17|OTTHUMG00000015031.6|OTTHUMT00000128717.1|EEF1A1-207|EEF1A1|1802|retained_intron|	retained_intron	0.413694	0.387304	1.46461	0.0145383
EEF1A1	ENST00000495333.5|ENSG00000156508.17|OTTHUMG00000015031.6|OTTHUMT00000041211.2|EEF1A1-209|EEF1A1|958|retained_intron|	retained_intron	-0.092216	0.886539	2.12425	0.000256447
EEF1B2	ENST00000445505.5|ENSG00000114942.13|OTTHUMG00000132891.3|OTTHUMT00000336437.2|EEF1B2-207|EEF1B2|515|protein_coding|	protein_coding	0.173956	0.759822	1.88803	0.00522581
EEF1D	ENST00000395119.7|ENSG00000104529.17|OTTHUMG00000165191.23|OTTHUMT00000382562.3|EEF1D-202|EEF1D|1249|protein_coding|	protein_coding	-0.0270059	0.93131	1.00055	0.000927724
EEF1D	ENST00000442189.6|ENSG00000104529.17|OTTHUMG00000165191.23|OTTHUMT00000382561.4|EEF1D-205|EEF1D|2207|protein_coding|	protein_coding	-0.432172	0.525458	1.39205	0.0423115
EFEMP2	ENST00000527378.1|ENSG00000172638.12|OTTHUMG00000166664.7|OTTHUMT00000391864.2|EFEMP2-208|EFEMP2|614|protein_coding|	protein_coding	-0.382085	0.538138	-2.32699	0.0334249
EFEMP2	ENST00000528176.5|ENSG00000172638.12|OTTHUMG00000166664.7|OTTHUMT00000391858.1|EFEMP2-210|EFEMP2|1504|protein_coding|	protein_coding	-0.775241	0.265687	2.16586	0.000647817
EFHC1	ENST00000538167.2|ENSG00000096093.15|OTTHUMG00000014848.13|-|EFHC1-205|EFHC1|5308|protein_coding|	protein_coding	-0.851586	0.062088	-1.73133	0.0101967
EFTUD2	ENST00000593072.5|ENSG00000108883.12|OTTHUMG00000179865.3|OTTHUMT00000448694.2|EFTUD2-225|EFTUD2|551|protein_coding|	protein_coding	-0.175038	0.821909	1.96373	0.0273261
EGLN3	ENST00000556785.1|ENSG00000129521.13|OTTHUMG00000029498.10|OTTHUMT00000413023.1|EGLN3-210|EGLN3|864|retained_intron|	retained_intron	0.0315407	0.973024	2.00917	0.0165723
EGR2	ENST00000639815.1|ENSG00000122877.15|OTTHUMG00000018308.6|OTTHUMT00000491461.1|EGR2-206|EGR2|1075|processed_transcript|	processed_transcript	-1.42941	0.0263268	-2.57874	0.00933259
EHBP1	ENST00000405482.5|ENSG00000115504.14|OTTHUMG00000129453.7|OTTHUMT00000326660.2|EHBP1-204|EHBP1|1311|protein_coding|	protein_coding	0.62717	0.190001	-2.18628	0.023511
EHD1	ENST00000488711.1|ENSG00000110047.17|OTTHUMG00000066832.17|OTTHUMT00000143237.2|EHD1-210|EHD1|648|processed_transcript|	processed_transcript	0.974601	0.0605676	2.02349	0.00110186
EHD2	ENST00000538399.1|ENSG00000024422.11|OTTHUMG00000183266.1|OTTHUMT00000465853.1|EHD2-202|EHD2|1766|protein_coding|	protein_coding	1.32615	0.249614	4.08442	0.000197793
EHF	ENST00000525253.5|ENSG00000135373.12|OTTHUMG00000166454.2|OTTHUMT00000389858.2|EHF-203|EHF|564|protein_coding|	protein_coding	3.36769	4.80751e-11	1.93335	0.0112745
EHMT1	ENST00000640639.1|ENSG00000181090.20|OTTHUMG00000020995.14|OTTHUMT00000490305.1|EHMT1-252|EHMT1|1259|protein_coding|	protein_coding	-0.816213	0.268216	1.98894	0.0181136
EHMT1	ENST00000488242.2|ENSG00000181090.20|OTTHUMG00000020995.14|OTTHUMT00000348993.2|EHMT1-214|EHMT1|789|processed_transcript|	processed_transcript	-0.157957	0.69638	1.10818	0.00956505
EHMT2	ENST00000477678.1|ENSG00000204371.11|OTTHUMG00000031180.6|OTTHUMT00000076352.2|EHMT2-209|EHMT2|679|retained_intron|	retained_intron	-0.855134	0.0811733	1.90605	5.06793e-06
EIF2A	ENST00000477551.5|ENSG00000144895.11|OTTHUMG00000159775.3|OTTHUMT00000357263.1|EIF2A-211|EIF2A|1906|nonsense_mediated_decay|	nonsense_mediated_decay	-1.24755	0.139202	-4.72425	0.0273666
EIF2B5	ENST00000484154.1|ENSG00000145191.12|OTTHUMG00000156840.3|OTTHUMT00000346180.1|EIF2B5-210|EIF2B5|449|retained_intron|	retained_intron	-0.529372	0.140134	-1.31744	0.0354171
EIF2B5	ENST00000492773.5|ENSG00000145191.12|OTTHUMG00000156840.3|OTTHUMT00000346178.1|EIF2B5-214|EIF2B5|553|processed_transcript|	processed_transcript	-0.533522	0.319509	1.11232	0.0340352
EIF3C	ENST00000331666.10|ENSG00000184110.14|OTTHUMG00000099443.4|OTTHUMT00000216908.3|EIF3C-201|EIF3C|3145|protein_coding|	protein_coding	0.0498421	0.961518	3.44978	6.29991e-06
EIF3D	ENST00000426531.5|ENSG00000100353.17|OTTHUMG00000150599.4|OTTHUMT00000319034.2|EIF3D-204|EIF3D|710|retained_intron|	retained_intron	-0.704116	0.194342	1.24223	0.0420718
EIF3E	ENST00000518442.5|ENSG00000104408.9|OTTHUMG00000164858.6|OTTHUMT00000380643.1|EIF3E-204|EIF3E|1285|retained_intron|	retained_intron	0.38051	0.476479	2.73059	2.47482e-09
EIF3G	ENST00000587681.5|ENSG00000130811.11|OTTHUMG00000180396.2|OTTHUMT00000451159.1|EIF3G-204|EIF3G|537|retained_intron|	retained_intron	1.46538	0.000533305	-3.43985	0.000152916
EIF3I	ENST00000355082.9|ENSG00000084623.11|OTTHUMG00000007364.5|OTTHUMT00000019597.3|EIF3I-201|EIF3I|564|protein_coding|	protein_coding	1.4176	0.00283482	1.52629	0.0272176
EIF4A1	ENST00000577269.5|ENSG00000161960.14|OTTHUMG00000108149.15|OTTHUMT00000441289.1|EIF4A1-203|EIF4A1|1319|protein_coding|	protein_coding	3.92845	0.00601489	6.3013	5.27815e-05
EIF4A2	ENST00000467585.1|ENSG00000156976.16|OTTHUMG00000156564.3|OTTHUMT00000344627.2|EIF4A2-215|EIF4A2|570|retained_intron|	retained_intron	0.00709172	0.987595	-1.36929	0.0457292
EIF4A2	ENST00000496382.1|ENSG00000156976.16|OTTHUMG00000156564.3|OTTHUMT00000344635.1|EIF4A2-225|EIF4A2|460|retained_intron|	retained_intron	-1.12421	4.96525e-15	-0.828548	4.09463e-06
EIF4G1	ENST00000435046.6|ENSG00000114867.20|OTTHUMG00000156784.21|OTTHUMT00000390375.1|EIF4G1-219|EIF4G1|4668|protein_coding|	protein_coding	1.30098	0.00115423	1.52307	0.00699241
EIF4G2	ENST00000532120.1|ENSG00000110321.16|OTTHUMG00000165823.7|OTTHUMT00000386891.1|EIF4G2-222|EIF4G2|223|processed_transcript|	processed_transcript	-1.5902	0.00559072	-5.05431	0.00163162
EIF4G2	ENST00000531180.1|ENSG00000110321.16|OTTHUMG00000165823.7|OTTHUMT00000386896.2|EIF4G2-217|EIF4G2|557|protein_coding|	protein_coding	-0.715044	0.395671	-3.02921	0.0261755
EIF5	ENST00000559011.1|ENSG00000100664.10|OTTHUMG00000171839.3|OTTHUMT00000415345.1|EIF5-208|EIF5|386|retained_intron|	retained_intron	0.83033	0.296966	2.39466	0.00585247
EIF6	ENST00000374436.7|ENSG00000242372.6|OTTHUMG00000032328.6|OTTHUMT00000125658.1|EIF6-201|EIF6|1252|protein_coding|	protein_coding	1.32839	3.60122e-06	-2.17668	0.00094376
EIF6	ENST00000374450.7|ENSG00000242372.6|OTTHUMG00000032328.6|OTTHUMT00000078848.3|EIF6-203|EIF6|1289|protein_coding|	protein_coding	0.736839	0.0377186	1.0232	0.0395873
EIF6	ENST00000462894.1|ENSG00000242372.6|OTTHUMG00000032328.6|OTTHUMT00000125662.1|EIF6-208|EIF6|453|processed_transcript|	processed_transcript	0.275734	0.528415	1.92187	0.000260166
ELANE	ENST00000263621.1|ENSG00000197561.6|OTTHUMG00000181839.4|-|ELANE-201|ELANE|920|protein_coding|	protein_coding	0.585333	0.502741	2.68022	0.000708973
ELF3	ENST00000367283.7|ENSG00000163435.15|OTTHUMG00000035867.4|OTTHUMT00000087359.1|ELF3-202|ELF3|2044|protein_coding|	protein_coding	2.91473	1.86282e-32	0.758086	0.0247531
ELF4	ENST00000615377.4|ENSG00000102034.16|OTTHUMG00000022390.2|-|ELF4-204|ELF4|3878|protein_coding|	protein_coding	-0.0673428	0.825101	-1.04561	0.013425
ELMO2	ENST00000452857.5|ENSG00000062598.17|OTTHUMG00000033070.6|OTTHUMT00000080472.1|ELMO2-207|ELMO2|2158|protein_coding|	protein_coding	-0.918184	0.0301993	1.1109	0.0208021
ELMO3	ENST00000360833.5|ENSG00000102890.14|OTTHUMG00000133570.3|OTTHUMT00000257667.2|ELMO3-201|ELMO3|2480|protein_coding|	protein_coding	-1.96994	0.005923	-2.53258	0.0260227
ELMSAN1	ENST00000451078.5|ENSG00000156030.13|OTTHUMG00000150359.3|OTTHUMT00000317796.1|ELMSAN1-206|ELMSAN1|2633|nonsense_mediated_decay|	nonsense_mediated_decay	-0.258683	0.794653	2.40571	0.00381458
ELN	ENST00000380576.9|ENSG00000049540.16|OTTHUMG00000150229.13|OTTHUMT00000348238.1|ELN-209|ELN|3109|protein_coding|	protein_coding	0.035538	0.963519	1.85512	0.0120859
ELN	ENST00000429192.5|ENSG00000049540.16|OTTHUMG00000150229.13|OTTHUMT00000348236.1|ELN-216|ELN|3298|protein_coding|	protein_coding	-0.760678	0.336608	-2.4708	0.0363741
ELN	ENST00000414324.5|ENSG00000049540.16|OTTHUMG00000150229.13|OTTHUMT00000348230.1|ELN-211|ELN|3139|protein_coding|	protein_coding	-1.98688	0.0233499	-5.142	0.0379499
ELOB	ENST00000409477.1|ENSG00000103363.14|OTTHUMG00000154125.2|OTTHUMT00000333977.1|ELOB-202|ELOB|997|protein_coding|	protein_coding	0.402724	0.270253	1.03483	0.015389
ELOVL1	ENST00000482302.5|ENSG00000066322.14|OTTHUMG00000007422.2|OTTHUMT00000019506.1|ELOVL1-211|ELOVL1|984|processed_transcript|	processed_transcript	0.219138	0.100733	-1.01707	3.79638e-07
ELOVL1	ENST00000465321.5|ENSG00000066322.14|OTTHUMG00000007422.2|OTTHUMT00000019508.1|ELOVL1-204|ELOVL1|726|processed_transcript|	processed_transcript	0.996988	0.287539	3.20303	0.000285403
ELP3	ENST00000523357.5|ENSG00000134014.16|OTTHUMG00000102124.3|OTTHUMT00000376303.1|ELP3-215|ELP3|874|protein_coding|	protein_coding	1.09758	0.0780803	1.86917	0.0217388
EMC10	ENST00000598585.1|ENSG00000161671.16|OTTHUMG00000183042.4|OTTHUMT00000464762.1|EMC10-206|EMC10|1610|protein_coding|	protein_coding	0.582921	0.667211	5.91234	1.02531e-08
EMC7	ENST00000528949.1|ENSG00000134153.9|OTTHUMG00000129367.4|OTTHUMT00000387962.3|EMC7-203|EMC7|506|protein_coding|	protein_coding	-0.258153	0.649833	-2.82009	0.029265
EML1	ENST00000553313.1|ENSG00000066629.16|OTTHUMG00000171529.2|OTTHUMT00000413957.1|EML1-204|EML1|583|retained_intron|	retained_intron	0.249552	0.71992	1.54658	0.0235752
EML2	ENST00000586195.5|ENSG00000125746.16|OTTHUMG00000182127.2|OTTHUMT00000459607.1|EML2-205|EML2|1952|nonsense_mediated_decay|	nonsense_mediated_decay	-0.57604	0.581234	2.2927	0.0236969
ENC1	ENST00000537006.1|ENSG00000171617.13|OTTHUMG00000102059.6|-|ENC1-206|ENC1|2024|protein_coding|	protein_coding	1.66758	0.00883563	2.85614	3.49234e-05
ENDOV	ENST00000518901.5|ENSG00000173818.16|OTTHUMG00000164638.10|OTTHUMT00000379501.3|ENDOV-206|ENDOV|2549|protein_coding|	protein_coding	-0.476781	0.552529	2.1664	0.0150848
ENHO	ENST00000399775.2|ENSG00000168913.6|OTTHUMG00000159589.1|OTTHUMT00000356348.1|ENHO-201|ENHO|1082|protein_coding|	protein_coding	-1.9825	2.27193e-26	0.490599	0.00245755
ENOX2	ENST00000338144.7|ENSG00000165675.16|OTTHUMG00000022401.2|-|ENOX2-201|ENOX2|4263|protein_coding|	protein_coding	0.222008	0.809185	2.68307	0.000929893
ENTPD2	ENST00000312665.7|ENSG00000054179.11|OTTHUMG00000020953.4|OTTHUMT00000055171.1|ENTPD2-201|ENTPD2|1500|protein_coding|	protein_coding	-0.381994	0.354061	1.26409	0.00369994
EPHB2	ENST00000374630.7|ENSG00000133216.16|OTTHUMG00000002881.4|OTTHUMT00000008059.3|EPHB2-202|EPHB2|3152|protein_coding|	protein_coding	4.47779	8.7335e-23	1.56234	0.0141997
EPN3	ENST00000574464.5|ENSG00000049283.17|OTTHUMG00000162155.5|OTTHUMT00000436889.1|EPN3-218|EPN3|2036|nonsense_mediated_decay|	nonsense_mediated_decay	1.58214	4.76206e-05	1.37762	0.0153083
EPS15L1	ENST00000594975.5|ENSG00000127527.13|OTTHUMG00000182361.2|OTTHUMT00000461042.1|EPS15L1-207|EPS15L1|2489|protein_coding|	protein_coding	1.17614	0.177442	2.41719	0.0139477
EPS15L1	ENST00000535753.6|ENSG00000127527.13|OTTHUMG00000182361.2|OTTHUMT00000461041.1|EPS15L1-203|EPS15L1|2666|protein_coding|	protein_coding	0.772901	0.0532829	-2.74057	0.00903396
EPS8L1	ENST00000540810.5|ENSG00000131037.14|OTTHUMG00000180513.3|OTTHUMT00000451714.3|EPS8L1-203|EPS8L1|2360|protein_coding|	protein_coding	1.13324	0.039392	1.64167	0.0446812
EPS8L2	ENST00000526198.5|ENSG00000177106.14|OTTHUMG00000165165.9|OTTHUMT00000382355.2|EPS8L2-205|EPS8L2|2289|protein_coding|	protein_coding	2.64936	0.00216631	4.89576	4.62202e-07
EPS8L2	ENST00000530636.5|ENSG00000177106.14|OTTHUMG00000165165.9|OTTHUMT00000382353.1|EPS8L2-218|EPS8L2|2469|protein_coding|	protein_coding	1.97454	0.0200487	5.95532	7.01955e-13
EPS8L2	ENST00000614442.4|ENSG00000177106.14|OTTHUMG00000165165.9|-|EPS8L2-231|EPS8L2|3188|protein_coding|	protein_coding	-0.638816	0.47087	-5.52222	0.00299227
EPS8L2	ENST00000527832.5|ENSG00000177106.14|OTTHUMG00000165165.9|OTTHUMT00000382379.1|EPS8L2-211|EPS8L2|1597|retained_intron|	retained_intron	0.404985	0.384433	1.31194	0.0181663
EPS8L2	ENST00000530118.1|ENSG00000177106.14|OTTHUMG00000165165.9|OTTHUMT00000382356.2|EPS8L2-216|EPS8L2|561|retained_intron|	retained_intron	0.388728	0.464685	1.53695	0.011025
ERBB2	ENST00000584450.5|ENSG00000141736.13|OTTHUMG00000179300.3|OTTHUMT00000445618.1|ERBB2-218|ERBB2|3730|protein_coding|	protein_coding	1.40408	0.125732	2.38785	0.0385296
ERBB2	ENST00000269571.9|ENSG00000141736.13|OTTHUMG00000179300.3|OTTHUMT00000445621.2|ERBB2-201|ERBB2|4545|protein_coding|	protein_coding	1.20806	0.0442423	1.68776	0.041084
ERBB2	ENST00000582818.5|ENSG00000141736.13|OTTHUMG00000179300.3|OTTHUMT00000445629.2|ERBB2-213|ERBB2|529|protein_coding|	protein_coding	-0.392576	0.627006	2.50458	0.000280781
ERBIN	ENST00000380935.5|ENSG00000112851.14|OTTHUMG00000097808.3|-|ERBIN-202|ERBIN|6692|protein_coding|	protein_coding	-1.94137	0.0238287	1.65045	0.0134144
ERCC1	ENST00000589165.5|ENSG00000012061.15|OTTHUMG00000182121.2|OTTHUMT00000459548.1|ERCC1-208|ERCC1|1453|protein_coding|	protein_coding	2.54329	1.1142e-05	1.84214	0.0297796
ERCC2	ENST00000587376.5|ENSG00000104884.14|OTTHUMG00000048190.4|OTTHUMT00000109629.4|ERCC2-210|ERCC2|817|nonsense_mediated_decay|	nonsense_mediated_decay	0.266051	0.674776	1.5846	0.00991412
ERF	ENST00000440177.6|ENSG00000105722.9|OTTHUMG00000182788.2|OTTHUMT00000463685.1|ERF-202|ERF|2032|protein_coding|	protein_coding	0.991418	0.135193	3.51715	1.91369e-07
ERGIC1	ENST00000519567.5|ENSG00000113719.15|OTTHUMG00000130520.8|OTTHUMT00000329258.2|ERGIC1-204|ERGIC1|501|processed_transcript|	processed_transcript	0.779459	0.212512	2.13044	0.0083042
ERLIN2	ENST00000521644.5|ENSG00000147475.14|OTTHUMG00000164005.4|OTTHUMT00000376715.2|ERLIN2-208|ERLIN2|1602|protein_coding|	protein_coding	-0.117169	0.8111	1.0954	0.0202678
ESPN	ENST00000477679.1|ENSG00000187017.15|OTTHUMG00000000753.8|OTTHUMT00000001933.2|ESPN-209|ESPN|885|retained_intron|	retained_intron	-0.510706	0.515703	1.50135	0.0358798
ESPN	ENST00000434576.1|ENSG00000187017.15|OTTHUMG00000000753.8|OTTHUMT00000002257.1|ESPN-204|ESPN|750|protein_coding|	protein_coding	-1.99691	1.81739e-06	0.803047	0.0267989
ESRRA	ENST00000545035.1|ENSG00000173153.13|OTTHUMG00000150641.7|OTTHUMT00000396595.2|ESRRA-207|ESRRA|677|protein_coding|	protein_coding	0.101609	0.905409	1.74055	0.0208223
ETFA	ENST00000560726.5|ENSG00000140374.15|OTTHUMG00000172586.6|OTTHUMT00000419304.2|ETFA-216|ETFA|942|protein_coding|	protein_coding	1.02019	0.00143969	1.11243	0.015166
ETFRF1	ENST00000557540.6|ENSG00000205707.10|OTTHUMG00000171190.5|OTTHUMT00000412204.2|ETFRF1-211|ETFRF1|1259|protein_coding|	protein_coding	-0.502172	0.0494412	-1.04407	0.0159484
EVL	ENST00000555606.5|ENSG00000196405.12|OTTHUMG00000171530.3|OTTHUMT00000413981.1|EVL-215|EVL|656|processed_transcript|	processed_transcript	-0.866016	0.225665	1.70499	0.00542278
EWSR1	ENST00000455726.5|ENSG00000182944.17|OTTHUMG00000151107.9|OTTHUMT00000321362.2|EWSR1-214|EWSR1|710|protein_coding|	protein_coding	0.808389	0.318652	2.18189	0.0187389
EWSR1	ENST00000415761.5|ENSG00000182944.17|OTTHUMG00000151107.9|OTTHUMT00000321361.2|EWSR1-209|EWSR1|587|protein_coding|	protein_coding	0.443156	0.272208	-1.75728	0.0192047
EWSR1	ENST00000397938.6|ENSG00000182944.17|OTTHUMG00000151107.9|OTTHUMT00000321345.1|EWSR1-206|EWSR1|2654|protein_coding|	protein_coding	0.26368	0.727218	2.31158	0.00487206
EXOSC1	ENST00000370884.5|ENSG00000171311.12|OTTHUMG00000018854.3|OTTHUMT00000049683.2|EXOSC1-201|EXOSC1|536|protein_coding|	protein_coding	0.718447	0.252698	2.28753	0.000445045
EXOSC10	ENST00000469634.5|ENSG00000171824.13|OTTHUMG00000002123.3|OTTHUMT00000006081.1|EXOSC10-204|EXOSC10|2361|retained_intron|	retained_intron	-0.358071	0.462273	1.13561	0.0187389
EXOSC7	ENST00000468667.5|ENSG00000075914.12|OTTHUMG00000133095.2|OTTHUMT00000346987.1|EXOSC7-205|EXOSC7|831|processed_transcript|	processed_transcript	-0.186007	0.665537	-1.77053	0.0275024
EXOSC7	ENST00000481405.1|ENSG00000075914.12|OTTHUMG00000133095.2|OTTHUMT00000346988.1|EXOSC7-207|EXOSC7|768|processed_transcript|	processed_transcript	-0.339141	0.609124	1.61163	0.0390802
EXOSC8	ENST00000470423.1|ENSG00000120699.12|OTTHUMG00000016742.4|OTTHUMT00000044538.1|EXOSC8-204|EXOSC8|208|processed_transcript|	processed_transcript	0.951894	0.00581579	1.04767	0.0287565
FADS1	ENST00000433932.5|ENSG00000149485.18|OTTHUMG00000157155.7|OTTHUMT00000347649.2|FADS1-204|FADS1|1690|protein_coding|	protein_coding	-0.704824	0.369616	1.97335	0.0452688
FADS1	ENST00000539999.1|ENSG00000149485.18|OTTHUMG00000157155.7|OTTHUMT00000398586.2|FADS1-213|FADS1|405|protein_coding|	protein_coding	-3.02432	2.96888e-05	-3.4482	0.00262832
FAM104A	ENST00000580032.1|ENSG00000133193.12|OTTHUMG00000150564.5|OTTHUMT00000441885.1|FAM104A-204|FAM104A|451|protein_coding|	protein_coding	2.48053	0.000196923	2.96782	0.000214575
FAM107B	ENST00000468747.5|ENSG00000065809.13|OTTHUMG00000017709.4|OTTHUMT00000046901.2|FAM107B-211|FAM107B|2633|protein_coding|	protein_coding	-1.02079	0.00545445	-1.48675	0.0118172
FAM118B	ENST00000533050.5|ENSG00000197798.8|OTTHUMG00000165817.3|OTTHUMT00000386346.1|FAM118B-209|FAM118B|2402|protein_coding|	protein_coding	0.193294	0.746424	3.59863	8.5019e-10
FAM126A	ENST00000409923.5|ENSG00000122591.11|OTTHUMG00000128435.3|OTTHUMT00000326866.1|FAM126A-202|FAM126A|3130|protein_coding|	protein_coding	0.0297002	0.933053	-1.22897	0.0101647
FAM129A	ENST00000487074.5|ENSG00000135842.16|OTTHUMG00000035388.2|OTTHUMT00000098699.1|FAM129A-204|FAM129A|3118|processed_transcript|	processed_transcript	1.4252	0.0395629	2.67455	0.000772483
FAM131A	ENST00000418281.5|ENSG00000175182.14|OTTHUMG00000156206.20|OTTHUMT00000343463.1|FAM131A-204|FAM131A|1664|protein_coding|	protein_coding	-1.41269	0.0234931	-2.17934	0.026879
FAM135A	ENST00000505675.1|ENSG00000082269.16|OTTHUMG00000014991.4|OTTHUMT00000360649.1|FAM135A-208|FAM135A|1622|retained_intron|	retained_intron	-0.788657	0.247533	1.31965	0.0482463
FAM156B	ENST00000509613.1|ENSG00000179304.16|OTTHUMG00000188219.4|OTTHUMT00000056699.3|FAM156B-202|FAM156B|1701|protein_coding|	protein_coding	-0.884522	0.148658	1.52625	0.0171129
FAM20A	ENST00000619787.4|ENSG00000108950.11|OTTHUMG00000180152.2|-|FAM20A-207|FAM20A|2798|protein_coding|	protein_coding	-0.460185	0.464197	-2.2072	0.0122491
FAM214B	ENST00000605392.1|ENSG00000005238.19|OTTHUMG00000019847.6|OTTHUMT00000468378.1|FAM214B-209|FAM214B|585|processed_transcript|	processed_transcript	-0.280801	0.531878	1.21606	0.00623507
FAM224B	ENST00000458667.1|ENSG00000230663.1|OTTHUMG00000036416.1|OTTHUMT00000088613.1|FAM224B-201|FAM224B|2032|lincRNA|	lincRNA	0.0894903	0.859066	1.50867	0.00281505
FAM3A	ENST00000369641.7|ENSG00000071889.16|OTTHUMG00000013418.20|OTTHUMT00000037370.2|FAM3A-203|FAM3A|1359|protein_coding|	protein_coding	0.578606	0.480972	3.10443	4.31271e-05
FAM45A	ENST00000498549.2|ENSG00000119979.16|OTTHUMG00000019143.1|OTTHUMT00000050626.1|FAM45A-210|FAM45A|499|processed_transcript|	processed_transcript	0.402303	0.52752	2.21802	0.000107188
FAM58A	ENST00000429336.5|ENSG00000262919.7|OTTHUMG00000024206.7|OTTHUMT00000060991.1|FAM58A-201|FAM58A|593|protein_coding|	protein_coding	0.205071	0.787805	1.7142	0.0231705
FAM89A	ENST00000466258.1|ENSG00000182118.7|OTTHUMG00000037960.2|OTTHUMT00000099227.1|FAM89A-202|FAM89A|983|processed_transcript|	processed_transcript	1.5292	0.0286528	3.21379	3.62314e-05
FAM98A	ENST00000475122.1|ENSG00000119812.18|OTTHUMG00000152152.5|OTTHUMT00000326649.1|FAM98A-206|FAM98A|1032|retained_intron|	retained_intron	0.959843	0.213095	2.57107	0.00144171
FARP1	ENST00000596256.1|ENSG00000152767.16|OTTHUMG00000017248.7|OTTHUMT00000462344.2|FARP1-216|FARP1|744|protein_coding|	protein_coding	-0.475148	0.49114	1.92814	0.000871908
FAT1	ENST00000507662.1|ENSG00000083857.13|OTTHUMG00000160320.9|OTTHUMT00000360231.1|FAT1-205|FAT1|428|processed_transcript|	processed_transcript	0.741927	0.0441323	1.03442	0.0381815
FAU	ENST00000526555.5|ENSG00000149806.10|OTTHUMG00000165606.2|OTTHUMT00000385270.2|FAU-204|FAU|507|protein_coding|	protein_coding	0.503975	0.336323	1.34833	0.0271702
FAXDC2	ENST00000520581.5|ENSG00000170271.10|OTTHUMG00000164141.2|OTTHUMT00000377433.1|FAXDC2-210|FAXDC2|868|nonsense_mediated_decay|	nonsense_mediated_decay	-0.649437	0.402043	2.22958	0.000630123
FBLN1	ENST00000455233.5|ENSG00000077942.18|OTTHUMG00000151340.4|OTTHUMT00000322291.2|FBLN1-213|FBLN1|671|protein_coding|	protein_coding	-0.752862	0.11858	2.49305	2.08684e-07
FBLN1	ENST00000476366.1|ENSG00000077942.18|OTTHUMG00000151340.4|OTTHUMT00000322302.1|FBLN1-217|FBLN1|872|processed_transcript|	processed_transcript	-2.33923	1.13767e-09	0.947899	0.00209157
FBLN1	ENST00000340923.9|ENSG00000077942.18|OTTHUMG00000151340.4|OTTHUMT00000353171.1|FBLN1-203|FBLN1|2348|protein_coding|	protein_coding	-1.39172	0.0267267	1.30342	0.0182408
FBXL16	ENST00000562563.1|ENSG00000127585.11|OTTHUMG00000090420.3|OTTHUMT00000421460.1|FBXL16-203|FBXL16|2257|protein_coding|	protein_coding	1.65826	0.00779572	2.72385	0.000136305
FBXL19	ENST00000562319.5|ENSG00000099364.16|OTTHUMG00000132403.6|OTTHUMT00000255535.2|FBXL19-205|FBXL19|2462|protein_coding|	protein_coding	0.740621	0.322115	3.55837	2.91873e-06
FBXO9	ENST00000484812.1|ENSG00000112146.16|OTTHUMG00000014869.9|OTTHUMT00000354267.1|FBXO9-212|FBXO9|543|retained_intron|	retained_intron	0.965208	0.0833832	1.93029	0.00192267
FBXW7	ENST00000393956.7|ENSG00000109670.13|OTTHUMG00000185246.3|OTTHUMT00000469962.1|FBXW7-204|FBXW7|1735|protein_coding|	protein_coding	-3.06407	0.0020668	1.80387	0.00438464
FBXW7	ENST00000604069.1|ENSG00000109670.13|OTTHUMG00000185246.3|OTTHUMT00000469965.1|FBXW7-208|FBXW7|615|retained_intron|	retained_intron	-0.0228112	0.97678	2.58277	0.000461469
FCGBP	ENST00000616721.5|ENSG00000275395.5|OTTHUMG00000182580.5|OTTHUMT00000493324.1|FCGBP-202|FCGBP|9382|protein_coding|	protein_coding	-1.23508	8.82675e-14	0.445636	0.0353232
FCGR2C	ENST00000508651.1|ENSG00000244682.7|OTTHUMG00000074101.5|OTTHUMT00000366701.1|FCGR2C-210|FCGR2C|542|processed_transcript|	processed_transcript	-1.15055	0.0310562	-2.09555	0.0115201
FDPS	ENST00000492244.5|ENSG00000160752.14|OTTHUMG00000013909.3|OTTHUMT00000039067.1|FDPS-217|FDPS|673|processed_transcript|	processed_transcript	0.717808	0.331259	-2.90505	0.046015
FDPS	ENST00000468479.5|ENSG00000160752.14|OTTHUMG00000013909.3|OTTHUMT00000039055.1|FDPS-207|FDPS|938|processed_transcript|	processed_transcript	-0.229152	0.433186	-1.37788	0.00189844
FDPS	ENST00000495308.5|ENSG00000160752.14|OTTHUMG00000013909.3|OTTHUMT00000039066.1|FDPS-219|FDPS|808|retained_intron|	retained_intron	0.494878	0.332991	3.01884	4.11832e-07
FDXR	ENST00000420580.6|ENSG00000161513.11|OTTHUMG00000179026.8|OTTHUMT00000444451.3|FDXR-203|FDXR|1705|protein_coding|	protein_coding	0.707929	0.30654	1.91262	0.0363221
FDXR	ENST00000579893.1|ENSG00000161513.11|OTTHUMG00000179026.8|OTTHUMT00000444461.4|FDXR-211|FDXR|558|protein_coding|	protein_coding	0.618366	0.307498	1.60273	0.0390213
FERMT1	ENST00000378844.1|ENSG00000101311.15|OTTHUMG00000031826.4|OTTHUMT00000077911.2|FERMT1-202|FERMT1|567|protein_coding|	protein_coding	0.86177	0.172942	1.84168	0.0127314
FES	ENST00000414248.6|ENSG00000182511.11|OTTHUMG00000044456.7|OTTHUMT00000391050.1|FES-204|FES|2327|protein_coding|	protein_coding	0.187108	0.715401	1.6029	0.0100003
FEZ2	ENST00000464964.1|ENSG00000171055.14|OTTHUMG00000152148.4|OTTHUMT00000325437.1|FEZ2-211|FEZ2|699|processed_transcript|	processed_transcript	0.916408	0.152547	-2.43565	0.0435226
FEZ2	ENST00000357996.4|ENSG00000171055.14|OTTHUMG00000152148.4|OTTHUMT00000325443.2|FEZ2-202|FEZ2|847|protein_coding|	protein_coding	-0.207115	0.83505	1.7687	0.0489368
FGF1	ENST00000612258.4|ENSG00000113578.17|OTTHUMG00000059703.9|-|FGF1-214|FGF1|3805|protein_coding|	protein_coding	-2.15423	0.00341651	1.6125	0.0114376
FGF7	ENST00000560979.1|ENSG00000140285.9|OTTHUMG00000131517.4|OTTHUMT00000417888.2|FGF7-205|FGF7|579|protein_coding|	protein_coding	-0.335522	0.565727	-2.16727	0.021169
FGFR1	ENST00000531196.5|ENSG00000077782.19|OTTHUMG00000147366.12|OTTHUMT00000382729.1|FGFR1-236|FGFR1|842|nonsense_mediated_decay|	nonsense_mediated_decay	-0.860971	0.0796865	1.34646	0.0113369
FGFR2	ENST00000336553.10|ENSG00000066468.22|OTTHUMG00000019175.12|OTTHUMT00000050717.2|FGFR2-201|FGFR2|2593|protein_coding|	protein_coding	0.669843	0.211034	2.09592	0.00286281
FGFR2	ENST00000490349.5|ENSG00000066468.22|OTTHUMG00000019175.12|OTTHUMT00000050729.5|FGFR2-219|FGFR2|1478|processed_transcript|	processed_transcript	1.89912	0.01534	2.55806	0.0110357
FGFR3	ENST00000474521.1|ENSG00000068078.17|OTTHUMG00000121148.5|OTTHUMT00000358202.1|FGFR3-207|FGFR3|545|processed_transcript|	processed_transcript	-0.502439	0.0634269	1.02964	0.000658005
FHL1	ENST00000630677.1|ENSG00000022267.16|OTTHUMG00000022504.7|OTTHUMT00000481756.1|FHL1-232|FHL1|756|retained_intron|	retained_intron	-1.93943	1.16757e-05	-1.50194	0.0269386
FHL1	ENST00000628568.1|ENSG00000022267.16|OTTHUMG00000022504.7|OTTHUMT00000481745.1|FHL1-227|FHL1|2304|protein_coding|	protein_coding	-1.86987	0.00476649	1.60974	0.0115971
FHL1	ENST00000370690.7|ENSG00000022267.16|OTTHUMG00000022504.7|OTTHUMT00000058460.1|FHL1-205|FHL1|2441|protein_coding|	protein_coding	-1.91422	0.0382683	2.40368	0.00119827
FHL1	ENST00000630684.2|ENSG00000022267.16|OTTHUMG00000022504.7|OTTHUMT00000481752.1|FHL1-233|FHL1|579|processed_transcript|	processed_transcript	-1.28519	0.0105468	2.02165	0.000982885
FHL1	ENST00000626004.1|ENSG00000022267.16|OTTHUMG00000022504.7|OTTHUMT00000481755.1|FHL1-221|FHL1|485|processed_transcript|	processed_transcript	-1.21568	0.203015	2.59183	0.00139827
FIBP	ENST00000533037.5|ENSG00000172500.12|OTTHUMG00000166846.2|OTTHUMT00000391617.1|FIBP-211|FIBP|1010|nonsense_mediated_decay|	nonsense_mediated_decay	-0.391533	0.619045	1.99263	0.00911342
FILIP1L	ENST00000471562.1|ENSG00000168386.18|OTTHUMG00000159055.3|OTTHUMT00000353075.1|FILIP1L-206|FILIP1L|2854|protein_coding|	protein_coding	0.36638	0.767	2.66704	0.0226443
FKBP8	ENST00000597960.7|ENSG00000105701.15|OTTHUMG00000183368.11|OTTHUMT00000466372.5|FKBP8-209|FKBP8|1781|protein_coding|	protein_coding	0.0419592	0.959608	2.12352	0.0031935
FKBP8	ENST00000596015.1|ENSG00000105701.15|OTTHUMG00000183368.11|OTTHUMT00000466375.2|FKBP8-204|FKBP8|612|protein_coding|	protein_coding	0.00196784	0.996309	1.66224	1.86049e-06
FLJ16779	ENST00000612722.1|ENSG00000275620.1|OTTHUMG00000187005.1|OTTHUMT00000474230.1|FLJ16779-201|FLJ16779|7638|antisense_RNA|	antisense_RNA	-1.01813	6.52845e-08	0.490627	0.0134334
FLNB	ENST00000493452.5|ENSG00000136068.14|OTTHUMG00000159158.1|OTTHUMT00000353577.1|FLNB-214|FLNB|7402|protein_coding|	protein_coding	3.59481	1.36475e-09	3.17149	3.19529e-05
FLNB	ENST00000475487.1|ENSG00000136068.14|OTTHUMG00000159158.1|OTTHUMT00000353580.1|FLNB-208|FLNB|541|retained_intron|	retained_intron	-0.059403	0.927915	1.54017	0.0078243
FLNB	ENST00000484981.1|ENSG00000136068.14|OTTHUMG00000159158.1|OTTHUMT00000353581.1|FLNB-211|FLNB|932|processed_transcript|	processed_transcript	1.64154	0.000267996	1.63427	0.0112004
FLOT1	ENST00000476729.5|ENSG00000137312.14|OTTHUMG00000031151.9|OTTHUMT00000257565.1|FLOT1-209|FLOT1|562|retained_intron|	retained_intron	-1.553	0.0531131	1.83268	0.019064
FLT3LG	ENST00000597551.5|ENSG00000090554.12|OTTHUMG00000186490.1|OTTHUMT00000465299.1|FLT3LG-206|FLT3LG|951|protein_coding|	protein_coding	0.429482	0.485178	2.61445	0.0001989
FN3KRP	ENST00000574832.5|ENSG00000141560.14|OTTHUMG00000177846.4|OTTHUMT00000439221.2|FN3KRP-207|FN3KRP|1422|nonsense_mediated_decay|	nonsense_mediated_decay	-0.11744	0.796897	1.01645	0.0204222
FNIP1	ENST00000615660.4|ENSG00000217128.11|OTTHUMG00000186338.1|-|FNIP1-205|FNIP1|6589|protein_coding|	protein_coding	-0.301235	0.647813	1.40548	0.0449013
FOPNL	ENST00000575073.5|ENSG00000133393.12|OTTHUMG00000129923.4|OTTHUMT00000436385.1|FOPNL-207|FOPNL|530|protein_coding|	protein_coding	0.437776	0.126745	-1.55279	0.0104438
FOXK2	ENST00000531030.5|ENSG00000141568.20|OTTHUMG00000140374.6|OTTHUMT00000391058.2|FOXK2-206|FOXK2|805|protein_coding|	protein_coding	0.982314	0.102055	1.53244	0.0438613
FOXP1	ENST00000318789.8|ENSG00000114861.18|OTTHUMG00000158803.6|OTTHUMT00000352250.1|FOXP1-202|FOXP1|7114|protein_coding|	protein_coding	-1.68267	0.0224448	1.28007	0.0487402
FOXP2	ENST00000638397.1|ENSG00000128573.24|OTTHUMG00000023131.17|-|FOXP2-227|FOXP2|240|protein_coding|	protein_coding	-0.849494	0.114354	2.2924	4.16132e-05
FOXP4	ENST00000409208.5|ENSG00000137166.14|OTTHUMG00000014679.8|OTTHUMT00000331294.1|FOXP4-205|FOXP4|3341|protein_coding|	protein_coding	0.834521	0.0563665	1.73981	0.00100106
FOXRED2	ENST00000216187.10|ENSG00000100350.14|OTTHUMG00000044614.6|OTTHUMT00000075371.2|FOXRED2-201|FOXRED2|3933|protein_coding|	protein_coding	2.94614	6.5288e-07	2.57222	0.00135768
FP236383.2	ENST00000625598.1|ENSG00000280614.1|OTTHUMG00000189718.1|OTTHUMT00000481343.1|FP236383.2-201|FP236383.2|923|lincRNA|	lincRNA	0.411689	0.226599	1.03783	0.0226443
FP236383.3	ENST00000627981.1|ENSG00000281181.1|OTTHUMG00000189719.1|OTTHUMT00000481344.1|FP236383.3-201|FP236383.3|923|lincRNA|	lincRNA	0.411689	0.226599	1.03783	0.0226443
FP325330.3	ENST00000623760.1|ENSG00000279712.1|OTTHUMG00000189277.1|OTTHUMT00000479265.1|FP325330.3-201|FP325330.3|9537|lincRNA|	lincRNA	-1.0225	5.21832e-06	0.657533	0.00328959
FP565260.2	ENST00000623476.2|ENSG00000276612.3|OTTHUMG00000189358.2|OTTHUMT00000479441.2|FP565260.2-201|FP565260.2|1599|protein_coding|	protein_coding	-1.13458	0.0667534	-2.40424	0.0095803
FP565260.6	ENST00000624120.3|ENSG00000280071.3|OTTHUMG00000189357.3|OTTHUMT00000479433.1|FP565260.6-205|FP565260.6|898|protein_coding|	protein_coding	0.523222	0.362147	2.25297	6.34997e-05
FP671120.3	ENST00000631211.1|ENSG00000280800.1|OTTHUMG00000189716.1|OTTHUMT00000481341.1|FP671120.3-201|FP671120.3|923|lincRNA|	lincRNA	0.411689	0.226599	1.03783	0.0226443
FP671120.4	ENST00000629969.1|ENSG00000281383.1|OTTHUMG00000189717.1|OTTHUMT00000481342.1|FP671120.4-201|FP671120.4|923|lincRNA|	lincRNA	0.607687	0.047572	1.0659	0.0107735
FRMD4A	ENST00000495956.2|ENSG00000151474.21|OTTHUMG00000017708.8|OTTHUMT00000046896.2|FRMD4A-209|FRMD4A|1287|protein_coding|	protein_coding	-0.20218	0.784782	1.56972	0.0363221
FSCN1	ENST00000473330.1|ENSG00000075618.17|OTTHUMG00000090599.5|OTTHUMT00000324032.1|FSCN1-205|FSCN1|2215|retained_intron|	retained_intron	0.430244	0.399541	-2.41139	0.0226733
FSCN1	ENST00000382361.7|ENSG00000075618.17|OTTHUMG00000090599.5|OTTHUMT00000207153.3|FSCN1-201|FSCN1|2777|protein_coding|	protein_coding	1.38727	3.85932e-23	0.425489	0.0302844
FTH1	ENST00000526640.5|ENSG00000167996.15|OTTHUMG00000166217.5|OTTHUMT00000388525.1|FTH1-202|FTH1|786|protein_coding|	protein_coding	0.0144738	0.992241	3.46621	0.00191027
FUBP3	ENST00000472006.1|ENSG00000107164.15|OTTHUMG00000020809.2|OTTHUMT00000054669.1|FUBP3-204|FUBP3|284|processed_transcript|	processed_transcript	-0.341615	0.532577	1.59094	0.00110173
FUNDC1	ENST00000483115.1|ENSG00000069509.5|OTTHUMG00000021399.1|OTTHUMT00000056321.1|FUNDC1-202|FUNDC1|1069|processed_transcript|	processed_transcript	-0.113308	0.910194	2.31342	0.014686
FUS	ENST00000570090.1|ENSG00000089280.18|OTTHUMG00000132395.5|OTTHUMT00000433558.1|FUS-213|FUS|544|retained_intron|	retained_intron	-0.428	0.262504	1.16778	0.00248551
FXYD5	ENST00000543307.5|ENSG00000089327.14|OTTHUMG00000048092.2|OTTHUMT00000109446.2|FXYD5-208|FXYD5|1003|protein_coding|	protein_coding	0.300023	0.1731	-1.22686	0.000661446
FYN	ENST00000368678.8|ENSG00000010810.17|OTTHUMG00000016305.10|OTTHUMT00000378107.1|FYN-204|FYN|2573|protein_coding|	protein_coding	2.09081	0.000804403	2.40602	0.00302557
FYN	ENST00000491885.6|ENSG00000010810.17|OTTHUMG00000016305.10|OTTHUMT00000043669.2|FYN-214|FYN|649|processed_transcript|	processed_transcript	0.335875	0.722092	3.30592	1.00877e-05
FZD8	ENST00000374694.2|ENSG00000177283.7|OTTHUMG00000017956.2|OTTHUMT00000047575.2|FZD8-201|FZD8|4030|protein_coding|	protein_coding	-1.12996	2.94617e-19	0.342609	0.0144217
FZR1	ENST00000592214.1|ENSG00000105325.13|OTTHUMG00000180747.3|OTTHUMT00000452939.1|FZR1-208|FZR1|598|retained_intron|	retained_intron	0.42608	0.408779	1.50088	0.0069644
G6PC3	ENST00000591696.1|ENSG00000141349.8|OTTHUMG00000181805.3|OTTHUMT00000457679.2|G6PC3-207|G6PC3|805|protein_coding|	protein_coding	-0.233655	0.749308	1.49067	0.0258714
G6PD	ENST00000393564.6|ENSG00000160211.15|OTTHUMG00000024237.8|OTTHUMT00000061170.4|G6PD-203|G6PD|1661|protein_coding|	protein_coding	1.05002	3.58531e-12	0.576383	0.00849349
GADD45A	ENST00000617962.1|ENSG00000116717.11|OTTHUMG00000009374.2|-|GADD45A-205|GADD45A|1142|protein_coding|	protein_coding	0.430365	0.604726	-3.11617	0.0488876
GALNT14	ENST00000349752.9|ENSG00000158089.14|OTTHUMG00000074077.3|OTTHUMT00000157264.1|GALNT14-202|GALNT14|2733|protein_coding|	protein_coding	0.357924	0.296606	1.00027	0.0203986
GAP43	ENST00000305124.10|ENSG00000172020.12|OTTHUMG00000133758.2|OTTHUMT00000258216.2|GAP43-201|GAP43|1691|protein_coding|	protein_coding	-1.44738	1.38206e-07	-0.988197	0.00611785
GAPDH	ENST00000492719.5|ENSG00000111640.14|OTTHUMG00000137379.1|OTTHUMT00000268069.1|GAPDH-209|GAPDH|930|retained_intron|	retained_intron	0.552364	0.120521	-1.9026	0.034921
GAPVD1	ENST00000469528.5|ENSG00000165219.21|OTTHUMG00000020678.9|OTTHUMT00000355648.1|GAPVD1-214|GAPVD1|466|processed_transcript|	processed_transcript	0.0390829	0.895402	1.34166	2.29486e-07
GARS	ENST00000496643.1|ENSG00000106105.13|OTTHUMG00000152769.1|OTTHUMT00000327743.1|GARS-209|GARS|772|retained_intron|	retained_intron	-0.0738344	0.860843	1.09286	0.00915316
GAS7	ENST00000578456.1|ENSG00000007237.18|OTTHUMG00000177945.15|OTTHUMT00000439874.1|GAS7-206|GAS7|831|retained_intron|	retained_intron	-0.664262	0.404941	3.19593	8.15751e-06
GAS8	ENST00000566266.5|ENSG00000141013.16|OTTHUMG00000138988.3|OTTHUMT00000420549.1|GAS8-214|GAS8|3174|nonsense_mediated_decay|	nonsense_mediated_decay	0.313527	0.721252	1.72332	0.0474703
GATAD2A	ENST00000609040.5|ENSG00000167491.17|OTTHUMG00000152541.10|OTTHUMT00000326681.2|GATAD2A-213|GATAD2A|1652|nonsense_mediated_decay|	nonsense_mediated_decay	1.28226	0.000621422	1.33303	0.0120633
GATB	ENST00000510720.1|ENSG00000059691.11|OTTHUMG00000161672.1|OTTHUMT00000365684.1|GATB-207|GATB|874|nonsense_mediated_decay|	nonsense_mediated_decay	-1.82657	0.00201957	1.31022	0.00858629
GATS	ENST00000538588.2|ENSG00000239521.7|OTTHUMG00000155289.6|OTTHUMT00000403234.1|GATS-210|GATS|557|processed_transcript|	processed_transcript	0.368929	0.463262	1.18512	0.0321149
GCH1	ENST00000254299.8|ENSG00000131979.18|OTTHUMG00000029754.4|OTTHUMT00000074214.2|GCH1-201|GCH1|2901|processed_transcript|	processed_transcript	2.32929	0.00223135	2.1875	0.0494193
GCN1	ENST00000549815.1|ENSG00000089154.10|OTTHUMG00000169338.2|OTTHUMT00000403593.1|GCN1-206|GCN1|543|retained_intron|	retained_intron	-1.24137	0.0614337	2.06645	0.00111144
GDF11	ENST00000546799.1|ENSG00000135414.9|OTTHUMG00000170188.4|OTTHUMT00000407932.1|GDF11-202|GDF11|1258|protein_coding|	protein_coding	0.415672	0.230952	1.16537	0.00341125
GFOD1	ENST00000379284.1|ENSG00000145990.10|OTTHUMG00000014276.2|OTTHUMT00000039903.1|GFOD1-202|GFOD1|8061|protein_coding|	protein_coding	-1.74531	0.00354723	-2.14204	0.0327512
GFOD2	ENST00000268797.11|ENSG00000141098.12|OTTHUMG00000137537.5|OTTHUMT00000268868.2|GFOD2-201|GFOD2|2126|protein_coding|	protein_coding	1.13958	1.73614e-23	0.370279	0.0180004
GFRA2	ENST00000517892.5|ENSG00000168546.10|OTTHUMG00000163897.6|OTTHUMT00000376336.2|GFRA2-203|GFRA2|1176|protein_coding|	protein_coding	-0.340928	0.600438	1.83304	0.000865991
GFRA3	ENST00000378362.3|ENSG00000146013.10|OTTHUMG00000129200.2|OTTHUMT00000373617.1|GFRA3-202|GFRA3|1837|protein_coding|	protein_coding	-1.09959	0.11822	1.49273	0.0187788
GGNBP2	ENST00000616019.1|ENSG00000278311.4|OTTHUMG00000188440.2|OTTHUMT00000477252.2|GGNBP2-214|GGNBP2|695|protein_coding|	protein_coding	0.94688	0.0839571	1.88669	0.00242317
GGT5	ENST00000424217.1|ENSG00000099998.17|OTTHUMG00000150796.3|OTTHUMT00000320122.2|GGT5-204|GGT5|576|protein_coding|	protein_coding	-0.24486	0.728472	-2.73971	0.0176594
GIGYF2	ENST00000409451.7|ENSG00000204120.14|OTTHUMG00000153237.9|OTTHUMT00000330320.1|GIGYF2-203|GIGYF2|5937|protein_coding|	protein_coding	-0.271337	0.721438	-2.91556	0.00457363
GIPC1	ENST00000589497.5|ENSG00000123159.15|OTTHUMG00000182248.5|OTTHUMT00000460277.1|GIPC1-210|GIPC1|853|nonsense_mediated_decay|	nonsense_mediated_decay	0.356192	0.310849	-1.2063	0.0480903
GIT1	ENST00000581348.5|ENSG00000108262.15|OTTHUMG00000132730.5|OTTHUMT00000447812.1|GIT1-211|GIT1|2827|protein_coding|	protein_coding	0.440721	0.567437	2.51681	0.00450967
GIT1	ENST00000578670.5|ENSG00000108262.15|OTTHUMG00000132730.5|OTTHUMT00000447814.1|GIT1-208|GIT1|918|nonsense_mediated_decay|	nonsense_mediated_decay	-0.791939	0.281582	1.69197	0.0292737
GIT2	ENST00000457474.6|ENSG00000139436.20|OTTHUMG00000169313.5|OTTHUMT00000403408.1|GIT2-205|GIT2|5291|protein_coding|	protein_coding	-0.969318	0.187155	-2.68008	0.0151637
GLB1	ENST00000464355.1|ENSG00000170266.15|OTTHUMG00000155781.7|OTTHUMT00000341910.1|GLB1-211|GLB1|557|processed_transcript|	processed_transcript	1.15158	0.0274335	1.3897	0.0498042
GLDN	ENST00000335449.10|ENSG00000186417.13|OTTHUMG00000131746.6|OTTHUMT00000254667.2|GLDN-201|GLDN|4971|protein_coding|	protein_coding	-2.00556	0.0134574	1.37911	0.0339922
GLI4	ENST00000340042.1|ENSG00000250571.6|OTTHUMG00000164952.6|-|GLI4-201|GLI4|1341|protein_coding|	protein_coding	0.488291	0.574072	1.82826	0.0458932
GLTP	ENST00000544393.5|ENSG00000139433.9|OTTHUMG00000169278.2|OTTHUMT00000403279.1|GLTP-205|GLTP|914|protein_coding|	protein_coding	1.83811	3.51154e-06	1.33841	0.0265544
GLYR1	ENST00000588297.5|ENSG00000140632.16|OTTHUMG00000129530.6|OTTHUMT00000433065.2|GLYR1-208|GLYR1|580|protein_coding|	protein_coding	0.768241	0.194175	-2.24677	0.0136277
GLYR1	ENST00000589389.5|ENSG00000140632.16|OTTHUMG00000129530.6|OTTHUMT00000433061.3|GLYR1-210|GLYR1|3606|protein_coding|	protein_coding	0.589976	0.43198	2.47728	0.0012042
GMEB2	ENST00000370069.5|ENSG00000101216.10|OTTHUMG00000032988.1|OTTHUMT00000080167.1|GMEB2-202|GMEB2|4011|protein_coding|	protein_coding	0.27204	0.64312	1.33685	0.0463333
GMPPA	ENST00000435316.5|ENSG00000144591.18|OTTHUMG00000058922.23|OTTHUMT00000130235.13|GMPPA-206|GMPPA|786|protein_coding|	protein_coding	0.364086	0.581682	-2.97219	0.00250906
GNA12	ENST00000471281.5|ENSG00000146535.13|OTTHUMG00000023064.5|OTTHUMT00000325240.1|GNA12-205|GNA12|1205|processed_transcript|	processed_transcript	0.359786	0.400929	1.38385	0.00474407
GNAI1	ENST00000418742.5|ENSG00000127955.15|OTTHUMG00000023523.10|OTTHUMT00000340229.6|GNAI1-202|GNAI1|607|protein_coding|	protein_coding	-0.340507	0.417882	-3.60872	0.00155857
GNAI1	ENST00000490206.1|ENSG00000127955.15|OTTHUMG00000023523.10|OTTHUMT00000340231.3|GNAI1-206|GNAI1|530|processed_transcript|	processed_transcript	1.44054	0.0414726	2.94471	0.000217609
GNAS	ENST00000488546.5|ENSG00000087460.24|OTTHUMG00000033069.21|OTTHUMT00000080419.9|GNAS-247|GNAS|897|processed_transcript|	processed_transcript	-0.0750088	0.952307	3.91185	2.39626e-05
GNB2	ENST00000393924.1|ENSG00000172354.9|OTTHUMG00000137419.5|OTTHUMT00000268401.1|GNB2-202|GNB2|1524|protein_coding|	protein_coding	0.648827	0.00236258	1.0701	0.000171273
GNB2	ENST00000412215.5|ENSG00000172354.9|OTTHUMG00000137419.5|OTTHUMT00000268405.2|GNB2-204|GNB2|545|protein_coding|	protein_coding	-0.130165	0.834363	2.10279	0.002464
GNB2	ENST00000470354.1|ENSG00000172354.9|OTTHUMG00000137419.5|OTTHUMT00000268407.1|GNB2-212|GNB2|902|retained_intron|	retained_intron	0.238774	0.792767	2.07078	0.023733
GNG2	ENST00000335281.8|ENSG00000186469.8|OTTHUMG00000171083.3|OTTHUMT00000411585.1|GNG2-201|GNG2|3729|protein_coding|	protein_coding	-0.440467	0.338355	1.01185	0.0399139
GNPTG	ENST00000529110.1|ENSG00000090581.9|OTTHUMG00000047835.6|OTTHUMT00000395322.2|GNPTG-207|GNPTG|552|protein_coding|	protein_coding	-0.224039	0.818178	2.70456	0.000297654
GOLGA2	ENST00000609374.5|ENSG00000167110.17|OTTHUMG00000020732.10|OTTHUMT00000471631.2|GOLGA2-212|GOLGA2|2973|protein_coding|	protein_coding	0.13492	0.888448	2.86439	0.000308851
GOLGA8A	ENST00000359187.4|ENSG00000175265.17|OTTHUMG00000129447.6|OTTHUMT00000251830.3|GOLGA8A-201|GOLGA8A|1877|protein_coding|	protein_coding	1.16111	0.224994	3.12475	0.000821218
GOLGA8B	ENST00000438958.2|ENSG00000215252.11|OTTHUMG00000129549.3|-|GOLGA8B-202|GOLGA8B|4252|protein_coding|	protein_coding	-0.0311548	0.973202	2.05628	0.0124101
GOSR2	ENST00000640871.1|ENSG00000108433.16|OTTHUMG00000178080.8|OTTHUMT00000491282.1|GOSR2-247|GOSR2|1045|protein_coding|	protein_coding	0.199665	0.723272	1.99933	6.24683e-05
GPAA1	ENST00000525308.1|ENSG00000197858.10|OTTHUMG00000165438.4|OTTHUMT00000384079.1|GPAA1-205|GPAA1|903|retained_intron|	retained_intron	-0.0610729	0.92732	-2.26542	0.0113074
GPAA1	ENST00000532758.5|ENSG00000197858.10|OTTHUMG00000165438.4|OTTHUMT00000384072.1|GPAA1-217|GPAA1|1079|retained_intron|	retained_intron	0.302318	0.66275	1.7534	0.0422502
GPANK1	ENST00000458083.5|ENSG00000204438.10|OTTHUMG00000031174.10|OTTHUMT00000267876.3|GPANK1-208|GPANK1|802|protein_coding|	protein_coding	0.0019387	0.997295	-2.4585	0.0131244
GPBP1L1	ENST00000498128.1|ENSG00000159592.10|OTTHUMG00000040990.1|OTTHUMT00000098384.1|GPBP1L1-214|GPBP1L1|559|processed_transcript|	processed_transcript	0.767362	0.0375911	1.01763	0.0470332
GPBP1L1	ENST00000467032.1|ENSG00000159592.10|OTTHUMG00000040990.1|OTTHUMT00000098387.1|GPBP1L1-204|GPBP1L1|592|processed_transcript|	processed_transcript	-0.57808	0.265827	1.19244	0.0420718
GPC1	ENST00000466624.1|ENSG00000063660.8|OTTHUMG00000133349.6|OTTHUMT00000326006.1|GPC1-207|GPC1|782|processed_transcript|	processed_transcript	-0.967207	0.0248387	-2.537	0.00364355
GPC1	ENST00000420138.5|ENSG00000063660.8|OTTHUMG00000133349.6|OTTHUMT00000325970.2|GPC1-202|GPC1|1835|protein_coding|	protein_coding	-2.60688	2.33486e-07	0.932713	0.0226189
GPI	ENST00000589640.5|ENSG00000105220.14|OTTHUMG00000182087.7|OTTHUMT00000459371.3|GPI-211|GPI|571|protein_coding|	protein_coding	0.60192	0.278175	2.79603	3.24377e-05
GPR108	ENST00000598626.5|ENSG00000125734.15|OTTHUMG00000170129.5|OTTHUMT00000407509.1|GPR108-213|GPR108|619|processed_transcript|	processed_transcript	0.0136645	0.960044	-1.42297	6.148e-05
GPR108	ENST00000537722.8|ENSG00000125734.15|OTTHUMG00000170129.5|OTTHUMT00000407506.1|GPR108-203|GPR108|619|processed_transcript|	processed_transcript	-0.262861	0.727102	1.48156	0.0453623
GPR137	ENST00000546201.5|ENSG00000173264.14|OTTHUMG00000167817.8|OTTHUMT00000397051.1|GPR137-219|GPR137|790|nonsense_mediated_decay|	nonsense_mediated_decay	1.33673	0.000116378	1.06446	0.0457363
GPR157	ENST00000466131.1|ENSG00000180758.11|OTTHUMG00000001758.5|OTTHUMT00000004908.1|GPR157-203|GPR157|458|retained_intron|	retained_intron	0.569473	0.27312	1.26705	0.0377602
GPR68	ENST00000529102.1|ENSG00000119714.10|OTTHUMG00000167590.4|OTTHUMT00000395246.3|GPR68-201|GPR68|1355|protein_coding|	protein_coding	2.16129	0.00836445	2.73009	0.00677265
GPRC5B	ENST00000535671.5|ENSG00000167191.11|OTTHUMG00000131460.4|OTTHUMT00000436045.2|GPRC5B-202|GPRC5B|1215|protein_coding|	protein_coding	-0.277581	0.689278	2.27839	0.00345422
GPRC5B	ENST00000569479.5|ENSG00000167191.11|OTTHUMG00000131460.4|OTTHUMT00000436047.1|GPRC5B-209|GPRC5B|2984|protein_coding|	protein_coding	-0.555932	0.37	1.57493	0.0141049
GPS1	ENST00000578392.5|ENSG00000169727.12|OTTHUMG00000178484.3|OTTHUMT00000442175.1|GPS1-207|GPS1|552|nonsense_mediated_decay|	nonsense_mediated_decay	-0.23855	0.682134	-1.94921	0.0165706
GPS2	ENST00000571695.1|ENSG00000132522.15|OTTHUMG00000102198.9|OTTHUMT00000440728.1|GPS2-206|GPS2|563|retained_intron|	retained_intron	-0.607189	0.347083	-3.19587	0.000633407
GPS2	ENST00000570780.5|ENSG00000132522.15|OTTHUMG00000102198.9|OTTHUMT00000440689.1|GPS2-203|GPS2|1238|protein_coding|	protein_coding	1.06288	0.173993	2.13244	0.027063
GRB2	ENST00000316615.9|ENSG00000177885.13|OTTHUMG00000134332.3|-|GRB2-201|GRB2|3181|protein_coding|	protein_coding	1.10911	0.14225	2.53891	0.00335958
GREM1	ENST00000560830.1|ENSG00000166923.10|OTTHUMG00000129319.4|OTTHUMT00000417303.1|GREM1-202|GREM1|2648|protein_coding|	protein_coding	-1.48193	5.42076e-15	-0.525948	0.0307347
GREM1	ENST00000622074.1|ENSG00000166923.10|OTTHUMG00000129319.4|OTTHUMT00000251455.3|GREM1-203|GREM1|14606|protein_coding|	protein_coding	-1.57106	2.20316e-19	-0.526352	0.0110357
GRHL1	ENST00000405379.6|ENSG00000134317.17|OTTHUMG00000151704.6|-|GRHL1-202|GRHL1|1881|protein_coding|	protein_coding	-0.399012	0.688637	2.24974	0.0055417
GRHL3	ENST00000236255.4|ENSG00000158055.15|OTTHUMG00000003040.6|OTTHUMT00000009048.3|GRHL3-201|GRHL3|1870|protein_coding|	protein_coding	2.09939	0.000280608	1.91441	0.031199
GRK6	ENST00000355958.9|ENSG00000198055.10|OTTHUMG00000163401.4|OTTHUMT00000373207.1|GRK6-202|GRK6|1789|protein_coding|	protein_coding	0.958725	0.0833427	1.91784	0.00469626
GRN	ENST00000639447.1|ENSG00000030582.17|OTTHUMG00000181816.3|-|GRN-222|GRN|1314|protein_coding|	protein_coding	1.25763	2.85285e-05	-1.82283	0.00234764
GSKIP	ENST00000555757.1|ENSG00000100744.14|OTTHUMG00000171420.2|OTTHUMT00000413339.2|GSKIP-206|GSKIP|361|protein_coding|	protein_coding	0.095078	0.90515	1.8097	0.0163922
GSN	ENST00000477863.5|ENSG00000148180.19|OTTHUMG00000020584.8|OTTHUMT00000053867.1|GSN-212|GSN|716|processed_transcript|	processed_transcript	-0.0601062	0.924437	1.66968	0.00331905
GSTK1	ENST00000443571.6|ENSG00000197448.13|OTTHUMG00000152637.7|OTTHUMT00000379440.1|GSTK1-205|GSTK1|850|protein_coding|	protein_coding	-0.508227	0.464515	1.5283	0.0297161
GSTP1	ENST00000398603.5|ENSG00000084207.15|OTTHUMG00000137430.2|OTTHUMT00000268507.1|GSTP1-201|GSTP1|700|protein_coding|	protein_coding	2.79137	1.14985e-06	1.76828	0.0493445
GTDC1	ENST00000241391.9|ENSG00000121964.14|OTTHUMG00000131835.6|-|GTDC1-201|GTDC1|2356|protein_coding|	protein_coding	0.442623	0.361862	1.60562	0.00886903
GTF2IRD1	ENST00000470715.1|ENSG00000006704.10|OTTHUMG00000023782.4|OTTHUMT00000351534.2|GTF2IRD1-204|GTF2IRD1|824|protein_coding|	protein_coding	-1.10456	0.0338295	-2.35617	0.0165683
GTF3C1	ENST00000569394.5|ENSG00000077235.17|OTTHUMG00000176805.8|OTTHUMT00000433864.1|GTF3C1-210|GTF3C1|566|retained_intron|	retained_intron	-1.18504	0.0027837	-1.46729	0.0240226
GTPBP3	ENST00000358792.11|ENSG00000130299.16|OTTHUMG00000182766.2|OTTHUMT00000463625.1|GTPBP3-202|GTPBP3|1951|protein_coding|	protein_coding	0.815199	0.163456	1.83224	0.0233932
GTPBP3	ENST00000600625.5|ENSG00000130299.16|OTTHUMG00000182766.2|OTTHUMT00000463626.1|GTPBP3-222|GTPBP3|2493|protein_coding|	protein_coding	-0.0320567	0.961039	1.44895	0.0216782
GUCY1A3	ENST00000511507.5|ENSG00000164116.16|OTTHUMG00000161700.3|OTTHUMT00000365781.1|GUCY1A3-208|GUCY1A3|2552|protein_coding|	protein_coding	0.681827	0.238692	1.65911	0.0344467
GUCY1A3	ENST00000511108.5|ENSG00000164116.16|OTTHUMG00000161700.3|OTTHUMT00000365777.1|GUCY1A3-207|GUCY1A3|2992|protein_coding|	protein_coding	0.622847	0.356193	2.00984	0.00451325
GUK1	ENST00000472939.5|ENSG00000143774.16|OTTHUMG00000039503.6|OTTHUMT00000095940.1|GUK1-221|GUK1|314|processed_transcript|	processed_transcript	-1.32038	0.0258333	-4.30483	4.88055e-06
GUK1	ENST00000492871.5|ENSG00000143774.16|OTTHUMG00000039503.6|OTTHUMT00000095935.1|GUK1-234|GUK1|1065|processed_transcript|	processed_transcript	1.02697	0.232059	4.28424	1.09966e-07
GUK1	ENST00000391865.7|ENSG00000143774.16|OTTHUMG00000039503.6|-|GUK1-210|GUK1|990|protein_coding|	protein_coding	1.08289	0.213207	3.14043	0.000506715
GUK1	ENST00000495999.5|ENSG00000143774.16|OTTHUMG00000039503.6|OTTHUMT00000095954.1|GUK1-237|GUK1|555|processed_transcript|	processed_transcript	-1.78775	0.00291827	1.47868	0.00159073
GUK1	ENST00000498115.1|ENSG00000143774.16|OTTHUMG00000039503.6|OTTHUMT00000095959.1|GUK1-239|GUK1|796|processed_transcript|	processed_transcript	-0.997046	0.110263	1.66288	0.0069644
GUK1	ENST00000481341.5|ENSG00000143774.16|OTTHUMG00000039503.6|OTTHUMT00000095958.1|GUK1-225|GUK1|333|processed_transcript|	processed_transcript	-0.371849	0.259895	1.74542	6.64283e-09
GUK1	ENST00000498092.5|ENSG00000143774.16|OTTHUMG00000039503.6|OTTHUMT00000095947.1|GUK1-238|GUK1|865|processed_transcript|	processed_transcript	0.0796535	0.930308	1.77351	0.0223836
GUK1	ENST00000464858.5|ENSG00000143774.16|OTTHUMG00000039503.6|OTTHUMT00000095956.1|GUK1-216|GUK1|633|processed_transcript|	processed_transcript	-0.48564	0.438144	2.71132	1.43114e-05
GUSB	ENST00000421103.5|ENSG00000169919.16|OTTHUMG00000023735.4|OTTHUMT00000344645.2|GUSB-202|GUSB|1742|protein_coding|	protein_coding	-1.07223	0.118019	1.80049	0.00629194
GUSB	ENST00000465785.5|ENSG00000169919.16|OTTHUMG00000023735.4|OTTHUMT00000345096.1|GUSB-208|GUSB|625|processed_transcript|	processed_transcript	-1.16709	2.71495e-05	0.857323	0.00496881
GUSBP11	ENST00000422506.5|ENSG00000228315.11|OTTHUMG00000150709.2|OTTHUMT00000471972.1|GUSBP11-201|GUSBP11|2055|processed_transcript|	processed_transcript	-0.000797199	0.999204	1.69112	0.0272947
H19	ENST00000422826.1|ENSG00000130600.17|OTTHUMG00000012477.5|OTTHUMT00000142902.3|H19-206|H19|1796|lincRNA|	lincRNA	-3.70777	0.000317696	-4.76988	0.017356
H2AFY	ENST00000510038.1|ENSG00000113648.16|OTTHUMG00000129141.3|OTTHUMT00000371703.1|H2AFY-215|H2AFY|1314|protein_coding|	protein_coding	2.5603	0.0001077	2.74392	0.0016869
H2AFY	ENST00000304332.8|ENSG00000113648.16|OTTHUMG00000129141.3|OTTHUMT00000371702.1|H2AFY-201|H2AFY|1881|protein_coding|	protein_coding	1.1436	2.33936e-34	-0.359628	0.00205538
H2AFY	ENST00000504197.5|ENSG00000113648.16|OTTHUMG00000129141.3|OTTHUMT00000372533.1|H2AFY-206|H2AFY|498|retained_intron|	retained_intron	0.678346	0.320018	2.66363	2.31341e-05
H2AFZ	ENST00000529158.5|ENSG00000164032.11|OTTHUMG00000131048.4|OTTHUMT00000388936.1|H2AFZ-206|H2AFZ|726|processed_transcript|	processed_transcript	-1.16209	0.222496	-3.66561	0.0479524
H2AFZ	ENST00000527366.1|ENSG00000164032.11|OTTHUMG00000131048.4|OTTHUMT00000388937.1|H2AFZ-205|H2AFZ|435|retained_intron|	retained_intron	1.73172	0.00969812	2.25401	0.0110036
H3F3A	ENST00000366816.5|ENSG00000163041.9|OTTHUMG00000037507.1|OTTHUMT00000091326.1|H3F3A-204|H3F3A|799|protein_coding|	protein_coding	0.00700904	0.991666	2.30686	2.48272e-06
H3F3B	ENST00000589599.5|ENSG00000132475.10|OTTHUMG00000179842.3|OTTHUMT00000448506.1|H3F3B-208|H3F3B|576|protein_coding|	protein_coding	0.631399	0.231883	1.60054	0.0174491
HACL1	ENST00000435217.6|ENSG00000131373.14|OTTHUMG00000129862.8|OTTHUMT00000342960.1|HACL1-206|HACL1|1269|protein_coding|	protein_coding	-0.319967	0.728254	1.89331	0.0187389
HACL1	ENST00000421993.5|ENSG00000131373.14|OTTHUMG00000129862.8|OTTHUMT00000343011.3|HACL1-204|HACL1|861|protein_coding|	protein_coding	-0.877733	0.24475	1.84551	0.0230906
HADHB	ENST00000537713.5|ENSG00000138029.13|OTTHUMG00000096978.4|-|HADHB-208|HADHB|2142|protein_coding|	protein_coding	0.302835	0.418085	1.12037	0.0116444
HAL	ENST00000546999.5|ENSG00000084110.10|OTTHUMG00000170354.2|OTTHUMT00000408648.1|HAL-206|HAL|2271|nonsense_mediated_decay|	nonsense_mediated_decay	2.59331	6.53239e-06	2.32138	0.00349392
HAPLN3	ENST00000562281.1|ENSG00000140511.11|OTTHUMG00000148680.5|OTTHUMT00000432802.2|HAPLN3-203|HAPLN3|801|protein_coding|	protein_coding	2.47066	4.17443e-06	2.07321	0.00968318
HARS	ENST00000415192.6|ENSG00000170445.12|OTTHUMG00000129502.6|OTTHUMT00000372859.1|HARS-202|HARS|1401|protein_coding|	protein_coding	2.73469	0.00304568	2.57608	0.0481344
HARS	ENST00000431330.6|ENSG00000170445.12|OTTHUMG00000129502.6|OTTHUMT00000372854.1|HARS-203|HARS|1774|protein_coding|	protein_coding	1.91042	0.000207605	1.88722	0.00746092
HAUS4	ENST00000206474.11|ENSG00000092036.18|OTTHUMG00000028710.8|OTTHUMT00000071680.3|HAUS4-201|HAUS4|1642|protein_coding|	protein_coding	-0.0171092	0.979645	1.36074	0.039604
HAUS4	ENST00000557591.5|ENSG00000092036.18|OTTHUMG00000028710.8|OTTHUMT00000413469.2|HAUS4-221|HAUS4|582|protein_coding|	protein_coding	-1.16746	0.0730053	-3.99637	0.000433458
HBA1	ENST00000320868.9|ENSG00000206172.8|OTTHUMG00000060138.3|OTTHUMT00000133459.1|HBA1-201|HBA1|577|protein_coding|	protein_coding	-0.535571	0.187824	1.0628	0.0380441
HBB	ENST00000475226.1|ENSG00000244734.3|OTTHUMG00000066678.5|OTTHUMT00000142979.1|HBB-203|HBB|319|retained_intron|	retained_intron	-0.197219	0.702163	1.5984	0.0112302
HBP1	ENST00000607681.1|ENSG00000105856.13|OTTHUMG00000157642.4|OTTHUMT00000471029.1|HBP1-215|HBP1|476|protein_coding|	protein_coding	0.529586	0.441757	-2.19302	0.0357216
HDAC11	ENST00000458642.5|ENSG00000163517.14|OTTHUMG00000129800.8|OTTHUMT00000318586.2|HDAC11-216|HDAC11|574|processed_transcript|	processed_transcript	-0.149228	0.832573	1.6427	0.010151
HDAC11	ENST00000425430.5|ENSG00000163517.14|OTTHUMG00000129800.8|OTTHUMT00000318581.2|HDAC11-210|HDAC11|1021|nonsense_mediated_decay|	nonsense_mediated_decay	1.15679	0.146835	2.75649	0.002016
HDAC3	ENST00000523088.5|ENSG00000171720.9|OTTHUMG00000129629.5|OTTHUMT00000375279.2|HDAC3-216|HDAC3|699|protein_coding|	protein_coding	1.12412	0.0621959	1.82394	0.0370721
HDAC3	ENST00000459727.5|ENSG00000171720.9|OTTHUMG00000129629.5|OTTHUMT00000318608.1|HDAC3-202|HDAC3|524|processed_transcript|	processed_transcript	0.714049	0.0209482	1.39235	0.000315114
HDAC4	ENST00000487617.5|ENSG00000068024.16|OTTHUMG00000133344.7|OTTHUMT00000326235.1|HDAC4-209|HDAC4|819|retained_intron|	retained_intron	0.397288	0.448642	1.75545	0.000507246
HDAC5	ENST00000592385.5|ENSG00000108840.15|OTTHUMG00000181806.2|OTTHUMT00000457688.1|HDAC5-211|HDAC5|2601|retained_intron|	retained_intron	1.77053	0.0331153	2.59634	0.0104669
HDAC6	ENST00000376619.6|ENSG00000094631.18|OTTHUMG00000034496.5|OTTHUMT00000318628.1|HDAC6-203|HDAC6|4179|protein_coding|	protein_coding	0.617267	0.327206	2.06523	0.00284654
HDAC8	ENST00000415409.5|ENSG00000147099.19|OTTHUMG00000021814.4|OTTHUMT00000057204.2|HDAC8-211|HDAC8|913|protein_coding|	protein_coding	1.14975	0.00084631	-1.63696	0.0421209
HDGF	ENST00000482651.5|ENSG00000143321.18|OTTHUMG00000041295.1|OTTHUMT00000098951.1|HDGF-208|HDGF|966|processed_transcript|	processed_transcript	1.72624	0.00275244	2.10129	0.00669325
HDHD3	ENST00000485934.1|ENSG00000119431.9|OTTHUMG00000020524.1|OTTHUMT00000053733.1|HDHD3-203|HDHD3|913|processed_transcript|	processed_transcript	1.14005	0.000334486	1.76213	7.14161e-06
HDLBP	ENST00000427487.5|ENSG00000115677.16|OTTHUMG00000133391.9|OTTHUMT00000323454.2|HDLBP-215|HDLBP|924|protein_coding|	protein_coding	-0.250228	0.624177	1.64118	0.000965695
HDLBP	ENST00000459788.1|ENSG00000115677.16|OTTHUMG00000133391.9|OTTHUMT00000323456.1|HDLBP-228|HDLBP|563|retained_intron|	retained_intron	-0.84814	0.137071	1.6673	0.00110214
HEBP2	ENST00000367697.7|ENSG00000051620.10|OTTHUMG00000015671.3|OTTHUMT00000042428.1|HEBP2-201|HEBP2|844|protein_coding|	protein_coding	1.28206	0.0409576	2.04194	0.0107862
HECTD1	ENST00000611816.4|ENSG00000092148.12|OTTHUMG00000170670.4|-|HECTD1-219|HECTD1|8980|protein_coding|	protein_coding	0.311434	0.402336	-1.23664	0.0423775
HELZ2	ENST00000467148.1|ENSG00000130589.16|OTTHUMG00000032969.3|OTTHUMT00000354127.1|HELZ2-204|HELZ2|8064|protein_coding|	protein_coding	2.38958	1.23479e-30	0.661634	0.0171246
HERC1	ENST00000561348.1|ENSG00000103657.13|OTTHUMG00000172433.5|OTTHUMT00000418526.1|HERC1-212|HERC1|588|retained_intron|	retained_intron	-0.101705	0.844419	1.21938	0.0126919
HERC1	ENST00000560897.1|ENSG00000103657.13|OTTHUMG00000172433.5|OTTHUMT00000418529.2|HERC1-210|HERC1|539|nonsense_mediated_decay|	nonsense_mediated_decay	-0.372518	0.405709	1.48986	0.000222338
HERC3	ENST00000264345.7|ENSG00000138641.15|OTTHUMG00000150436.8|-|HERC3-201|HERC3|4764|protein_coding|	protein_coding	-0.292628	0.56326	-1.76224	0.0411696
HGNC:18790	ENST00000504171.1|ENSG00000168824.14|OTTHUMG00000160002.3|OTTHUMT00000358777.1|HGNC:18790-205|HGNC:18790|980|protein_coding|	protein_coding	1.3912	7.05819e-07	-2.8576	7.70491e-05
HGNC:18790	ENST00000513829.5|ENSG00000168824.14|OTTHUMG00000160002.3|OTTHUMT00000358778.1|HGNC:18790-210|HGNC:18790|1486|nonsense_mediated_decay|	nonsense_mediated_decay	0.421166	0.27894	1.42785	0.00172605
HGSNAT	ENST00000521576.1|ENSG00000165102.14|OTTHUMG00000164102.2|OTTHUMT00000377298.1|HGSNAT-207|HGSNAT|2332|protein_coding|	protein_coding	0.43267	0.441554	1.47583	0.0205593
HIC2	ENST00000443632.2|ENSG00000169635.9|OTTHUMG00000150781.3|OTTHUMT00000320061.2|HIC2-203|HIC2|6940|protein_coding|	protein_coding	0.127887	0.854302	1.69054	0.0431944
HIST2H2AA3	ENST00000369159.2|ENSG00000203812.2|OTTHUMG00000188678.1|OTTHUMT00000477885.1|HIST2H2AA3-201|HIST2H2AA3|549|protein_coding|	protein_coding	0.995459	0.370389	2.91236	0.00933307
HIST2H4A	ENST00000578186.2|ENSG00000270882.2|OTTHUMG00000012189.8|OTTHUMT00000477881.1|HIST2H4A-201|HIST2H4A|583|protein_coding|	protein_coding	0.0430021	0.939067	1.5683	0.000615236
HIVEP3	ENST00000372584.5|ENSG00000127124.14|OTTHUMG00000006361.1|OTTHUMT00000016977.1|HIVEP3-202|HIVEP3|12319|protein_coding|	protein_coding	0.449316	0.654616	2.27604	0.0203534
HLA-DQA1	ENST00000374949.2|ENSG00000196735.11|OTTHUMG00000031106.7|OTTHUMT00000276110.1|HLA-DQA1-202|HLA-DQA1|1060|protein_coding|	protein_coding	1.50382	0.0145942	1.95935	0.0191808
HLA-DQB1	ENST00000434651.6|ENSG00000179344.16|OTTHUMG00000031124.4|OTTHUMT00000276126.1|HLA-DQB1-205|HLA-DQB1|1642|protein_coding|	protein_coding	-0.584713	0.367101	-3.28331	0.0164224
HLA-F	ENST00000434407.6|ENSG00000204642.13|OTTHUMG00000031156.5|OTTHUMT00000195084.1|HLA-F-220|HLA-F|884|protein_coding|	protein_coding	0.301451	0.62497	1.7349	0.00777239
HLA-L	ENST00000482052.5|ENSG00000243753.5|OTTHUMG00000031164.4|OTTHUMT00000356318.1|HLA-L-211|HLA-L|1765|processed_transcript|	processed_transcript	1.03884	0.00935502	1.67298	0.000988708
HMGCL	ENST00000235958.4|ENSG00000117305.14|OTTHUMG00000002963.4|OTTHUMT00000372573.1|HMGCL-201|HMGCL|1101|protein_coding|	protein_coding	-0.814527	0.354742	3.64298	1.27533e-06
HMGCR	ENST00000508070.1|ENSG00000113161.15|OTTHUMG00000102069.5|OTTHUMT00000369028.1|HMGCR-206|HMGCR|450|retained_intron|	retained_intron	0.965103	0.00861248	1.18178	0.0153385
HMOX2	ENST00000458134.7|ENSG00000103415.11|OTTHUMG00000129473.3|OTTHUMT00000438510.1|HMOX2-205|HMOX2|1797|protein_coding|	protein_coding	1.27769	0.0232613	1.82021	0.0159215
HMOX2	ENST00000572812.5|ENSG00000103415.11|OTTHUMG00000129473.3|OTTHUMT00000438513.2|HMOX2-209|HMOX2|549|protein_coding|	protein_coding	1.15439	0.00110352	-2.0432	0.036142
HMOX2	ENST00000570622.1|ENSG00000103415.11|OTTHUMG00000129473.3|OTTHUMT00000438520.1|HMOX2-207|HMOX2|514|protein_coding|	protein_coding	0.992348	0.000826674	1.1065	0.00567188
HNRNPC	ENST00000556226.5|ENSG00000092199.17|OTTHUMG00000170757.3|OTTHUMT00000410249.1|HNRNPC-224|HNRNPC|629|protein_coding|	protein_coding	0.631593	0.257367	1.75159	0.020189
HNRNPC	ENST00000557157.5|ENSG00000092199.17|OTTHUMG00000170757.3|OTTHUMT00000410241.2|HNRNPC-229|HNRNPC|698|protein_coding|	protein_coding	0.32415	0.648326	2.28315	0.00648512
HNRNPH1	ENST00000521173.5|ENSG00000169045.17|OTTHUMG00000130908.43|OTTHUMT00000375595.1|HNRNPH1-239|HNRNPH1|831|protein_coding|	protein_coding	0.784603	0.02808	-2.50246	0.00121163
HNRNPK	ENST00000351839.7|ENSG00000165119.20|OTTHUMG00000020107.4|OTTHUMT00000052856.1|HNRNPK-201|HNRNPK|2652|protein_coding|	protein_coding	-1.48392	0.232982	-5.08113	0.0268754
HNRNPM	ENST00000348943.7|ENSG00000099783.11|OTTHUMG00000182383.6|OTTHUMT00000460893.2|HNRNPM-202|HNRNPM|2568|protein_coding|	protein_coding	0.229526	0.858846	3.77033	0.000102596
HNRNPM	ENST00000598367.5|ENSG00000099783.11|OTTHUMG00000182383.6|OTTHUMT00000460945.1|HNRNPM-210|HNRNPM|298|protein_coding|	protein_coding	0.0325585	0.968167	-4.25531	0.000373996
HNRNPU	ENST00000640119.1|ENSG00000153187.18|OTTHUMG00000040396.15|OTTHUMT00000492353.1|HNRNPU-225|HNRNPU|461|nonsense_mediated_decay|	nonsense_mediated_decay	-0.19034	0.78162	-2.58606	0.00430668
HNRNPU	ENST00000476241.2|ENSG00000153187.18|OTTHUMG00000040396.15|OTTHUMT00000356455.3|HNRNPU-209|HNRNPU|4844|retained_intron|	retained_intron	-0.997209	0.137995	-2.21774	0.0288004
HNRNPU	ENST00000640306.1|ENSG00000153187.18|OTTHUMG00000040396.15|OTTHUMT00000492349.3|HNRNPU-228|HNRNPU|2917|nonsense_mediated_decay|	nonsense_mediated_decay	3.93055	6.07479e-05	3.42651	0.012375
HOMER2	ENST00000558817.1|ENSG00000103942.12|OTTHUMG00000172462.6|OTTHUMT00000418690.2|HOMER2-206|HOMER2|555|protein_coding|	protein_coding	-0.0761933	0.92313	1.83458	0.00402868
HOXC10	ENST00000511575.1|ENSG00000180818.4|OTTHUMG00000160031.2|OTTHUMT00000358954.1|HOXC10-202|HOXC10|887|processed_transcript|	processed_transcript	-1.29522	4.66962e-10	-0.605674	0.0343658
HPS1	ENST00000480020.5|ENSG00000107521.18|OTTHUMG00000018876.2|OTTHUMT00000049769.1|HPS1-212|HPS1|795|processed_transcript|	processed_transcript	0.0460231	0.895839	1.01283	0.00360048
HPS5	ENST00000352460.7|ENSG00000110756.17|OTTHUMG00000166612.6|OTTHUMT00000395867.1|HPS5-202|HPS5|1642|processed_transcript|	processed_transcript	1.19424	0.0612739	1.83299	0.0327131
HR	ENST00000381418.8|ENSG00000168453.14|OTTHUMG00000097089.4|OTTHUMT00000214213.1|HR-202|HR|6336|protein_coding|	protein_coding	1.56446	4.42097e-11	0.785638	0.031211
HS3ST3A1	ENST00000578576.1|ENSG00000153976.2|OTTHUMG00000058768.2|OTTHUMT00000447603.1|HS3ST3A1-202|HS3ST3A1|750|protein_coding|	protein_coding	2.6029	5.85551e-09	1.47018	0.0491286
HSD17B11	ENST00000507286.1|ENSG00000198189.10|OTTHUMG00000130594.5|OTTHUMT00000363603.2|HSD17B11-203|HSD17B11|851|protein_coding|	protein_coding	-0.68705	0.109034	-1.56198	0.0314604
HSD17B4	ENST00000515320.5|ENSG00000133835.14|OTTHUMG00000128899.5|OTTHUMT00000371138.1|HSD17B4-222|HSD17B4|2494|protein_coding|	protein_coding	0.197312	0.556492	-1.31153	0.0117724
HSPA1A	ENST00000375651.6|ENSG00000204389.9|OTTHUMG00000031201.3|OTTHUMT00000076401.2|HSPA1A-201|HSPA1A|2483|protein_coding|	protein_coding	-0.51121	0.0680819	1.12312	0.000899785
HSPA2	ENST00000554883.1|ENSG00000126803.9|OTTHUMG00000141311.4|OTTHUMT00000411969.1|HSPA2-203|HSPA2|457|processed_transcript|	processed_transcript	1.17014	0.117902	3.01542	5.80327e-05
HSPA8	ENST00000525463.5|ENSG00000109971.13|OTTHUMG00000166030.2|OTTHUMT00000387532.2|HSPA8-205|HSPA8|583|protein_coding|	protein_coding	3.29207	3.22506e-06	2.60006	0.00822163
HSPA9	ENST00000501917.6|ENSG00000113013.12|OTTHUMG00000129206.4|OTTHUMT00000373733.1|HSPA9-202|HSPA9|275|processed_transcript|	processed_transcript	-0.60159	0.14197	-1.48934	0.0271655
HSPBP1	ENST00000433386.6|ENSG00000133265.10|OTTHUMG00000180705.2|OTTHUMT00000452671.1|HSPBP1-202|HSPBP1|1572|protein_coding|	protein_coding	1.21988	2.58888e-13	0.528147	0.0374703
HTT	ENST00000513806.1|ENSG00000197386.10|OTTHUMG00000159916.5|OTTHUMT00000359375.2|HTT-213|HTT|432|processed_transcript|	processed_transcript	0.664587	0.179197	1.43867	0.0136998
HUWE1	ENST00000474971.1|ENSG00000086758.15|OTTHUMG00000021617.8|OTTHUMT00000056768.1|HUWE1-210|HUWE1|598|retained_intron|	retained_intron	-0.350675	0.0888318	-2.22122	8.07328e-10
HYOU1	ENST00000530473.5|ENSG00000149428.18|OTTHUMG00000166354.9|OTTHUMT00000389363.3|HYOU1-207|HYOU1|2023|protein_coding|	protein_coding	2.41465	0.000284001	2.05995	0.0460899
IARS	ENST00000467876.1|ENSG00000196305.17|OTTHUMG00000020219.3|OTTHUMT00000053071.1|IARS-207|IARS|298|processed_transcript|	processed_transcript	-0.803656	0.146494	1.37604	0.0401351
ICA1	ENST00000402384.7|ENSG00000003147.17|OTTHUMG00000152008.8|OTTHUMT00000324793.1|ICA1-206|ICA1|2458|protein_coding|	protein_coding	0.0769997	0.934518	2.14697	0.00563818
ICAM3	ENST00000589261.5|ENSG00000076662.9|OTTHUMG00000180410.2|OTTHUMT00000451236.1|ICAM3-205|ICAM3|2024|protein_coding|	protein_coding	0.824813	0.176348	1.98317	0.00607089
ICOSLG	ENST00000344330.8|ENSG00000160223.16|OTTHUMG00000086920.1|OTTHUMT00000195840.1|ICOSLG-201|ICOSLG|1009|protein_coding|	protein_coding	0.195956	0.769796	2.17909	0.00270293
IDH3A	ENST00000558509.5|ENSG00000166411.13|OTTHUMG00000143732.11|OTTHUMT00000419140.1|IDH3A-205|IDH3A|617|nonsense_mediated_decay|	nonsense_mediated_decay	1.9136	0.00445526	-3.48671	0.0213217
IDH3A	ENST00000559803.5|ENSG00000166411.13|OTTHUMG00000143732.11|OTTHUMT00000419153.1|IDH3A-214|IDH3A|1008|nonsense_mediated_decay|	nonsense_mediated_decay	0.82113	0.344079	1.9601	0.0482856
IDH3G	ENST00000444450.5|ENSG00000067829.18|OTTHUMG00000024219.30|OTTHUMT00000061082.2|IDH3G-206|IDH3G|888|protein_coding|	protein_coding	0.0955531	0.891461	2.08793	0.000874771
IFITM3	ENST00000526811.4|ENSG00000142089.15|OTTHUMG00000165542.2|OTTHUMT00000384767.2|IFITM3-202|IFITM3|543|protein_coding|	protein_coding	0.74671	0.0954917	1.34539	0.0270949
IFT122	ENST00000348417.6|ENSG00000163913.11|OTTHUMG00000159516.13|OTTHUMT00000355852.1|IFT122-203|IFT122|3877|protein_coding|	protein_coding	-0.414325	0.551979	-2.17932	0.0431944
IFT122	ENST00000296266.7|ENSG00000163913.11|OTTHUMG00000159516.13|OTTHUMT00000355851.1|IFT122-201|IFT122|4151|protein_coding|	protein_coding	-0.975203	0.169184	1.95242	0.0182005
IFT122	ENST00000511425.5|ENSG00000163913.11|OTTHUMG00000159516.13|OTTHUMT00000355858.1|IFT122-222|IFT122|2225|retained_intron|	retained_intron	-1.20778	0.00801541	1.13117	0.0160278
IGF2	ENST00000416167.6|ENSG00000167244.18|OTTHUMG00000009395.11|OTTHUMT00000026053.2|IGF2-205|IGF2|5585|protein_coding|	protein_coding	-0.945755	0.154382	1.67842	0.00563818
IGFBP2	ENST00000436812.1|ENSG00000115457.9|OTTHUMG00000155341.2|OTTHUMT00000339544.1|IGFBP2-203|IGFBP2|751|protein_coding|	protein_coding	-0.619585	0.313076	-2.31559	0.0125931
IGFBP3	ENST00000275521.10|ENSG00000146674.14|OTTHUMG00000023769.9|OTTHUMT00000251356.3|IGFBP3-201|IGFBP3|2262|protein_coding|	protein_coding	1.63085	2.34035e-05	1.34538	0.0177132
IGFBP7-AS1	ENST00000499667.6|ENSG00000245067.6|OTTHUMG00000161143.4|OTTHUMT00000363941.3|IGFBP7-AS1-201|IGFBP7-AS1|1389|antisense_RNA|	antisense_RNA	0.11254	0.812774	1.04631	0.0266246
IGSF11	ENST00000393775.6|ENSG00000144847.12|OTTHUMG00000159387.4|OTTHUMT00000355075.2|IGSF11-202|IGSF11|3495|protein_coding|	protein_coding	-0.795779	0.219863	1.631	0.0430427
IK	ENST00000515015.1|ENSG00000113141.17|OTTHUMG00000163374.4|OTTHUMT00000372907.1|IK-208|IK|493|retained_intron|	retained_intron	-0.727186	0.0457241	-1.5415	0.00961646
IK	ENST00000610522.4|ENSG00000113141.17|OTTHUMG00000163374.4|-|IK-211|IK|737|protein_coding|	protein_coding	-0.866219	0.387304	3.62886	2.94721e-06
IKBKB	ENST00000518679.5|ENSG00000104365.13|OTTHUMG00000164092.2|OTTHUMT00000377222.1|IKBKB-209|IKBKB|2784|nonsense_mediated_decay|	nonsense_mediated_decay	1.37147	0.00181558	1.3428	0.0379499
IL11RA	ENST00000555247.5|ENSG00000137070.17|OTTHUMG00000019837.7|OTTHUMT00000410626.1|IL11RA-209|IL11RA|1669|nonsense_mediated_decay|	nonsense_mediated_decay	-1.11893	1.36176e-08	-0.593631	0.0338865
IL11RA	ENST00000441545.6|ENSG00000137070.17|OTTHUMG00000019837.7|OTTHUMT00000410627.1|IL11RA-202|IL11RA|1700|protein_coding|	protein_coding	1.98305	0.0860174	4.9323	4.10504e-06
IL11RA	ENST00000602473.5|ENSG00000137070.17|OTTHUMG00000019837.7|OTTHUMT00000052240.1|IL11RA-215|IL11RA|1388|protein_coding|	protein_coding	-1.14107	1.53932e-18	-0.362834	0.0237473
IL17RC	ENST00000451165.5|ENSG00000163702.18|OTTHUMG00000128648.40|OTTHUMT00000339241.1|IL17RC-212|IL17RC|1053|nonsense_mediated_decay|	nonsense_mediated_decay	-0.591586	0.205109	-1.82101	0.0489368
IL17RC	ENST00000455057.5|ENSG00000163702.18|OTTHUMG00000128648.40|OTTHUMT00000339247.1|IL17RC-215|IL17RC|2244|protein_coding|	protein_coding	0.0410565	0.970696	2.42585	0.0157365
IL1R2	ENST00000474085.5|ENSG00000115590.13|OTTHUMG00000130695.2|OTTHUMT00000339990.1|IL1R2-206|IL1R2|655|retained_intron|	retained_intron	-1.26812	0.0515703	1.78263	0.0060344
IL20RA	ENST00000468393.5|ENSG00000016402.13|OTTHUMG00000015654.2|OTTHUMT00000042394.2|IL20RA-206|IL20RA|921|protein_coding|	protein_coding	-0.623493	0.311474	-2.24355	0.0463623
IL32	ENST00000528163.6|ENSG00000008517.16|OTTHUMG00000167498.6|OTTHUMT00000404923.1|IL32-213|IL32|950|protein_coding|	protein_coding	2.20243	0.0041845	2.49345	0.0152432
IL32	ENST00000552356.5|ENSG00000008517.16|OTTHUMG00000167498.6|OTTHUMT00000404928.1|IL32-232|IL32|623|protein_coding|	protein_coding	1.48789	0.0680872	2.45544	0.00960146
IL34	ENST00000574181.1|ENSG00000157368.10|OTTHUMG00000137581.5|OTTHUMT00000440203.1|IL34-206|IL34|576|retained_intron|	retained_intron	-2.8115	3.63603e-28	0.337805	0.0483682
IL4I1	ENST00000593956.5|ENSG00000104951.15|OTTHUMG00000183377.2|OTTHUMT00000466417.2|IL4I1-203|IL4I1|506|protein_coding|	protein_coding	3.09463	4.36665e-13	1.98136	0.0020584
IL6ST	ENST00000523039.5|ENSG00000134352.19|OTTHUMG00000097043.11|OTTHUMT00000374435.1|IL6ST-213|IL6ST|481|retained_intron|	retained_intron	0.163849	0.795803	-3.52447	0.000230359
IMMT	ENST00000410111.7|ENSG00000132305.20|OTTHUMG00000153170.5|OTTHUMT00000329909.2|IMMT-204|IMMT|3001|protein_coding|	protein_coding	0.0976116	0.850733	1.10869	0.0474466
IMMT	ENST00000620815.4|ENSG00000132305.20|OTTHUMG00000153170.5|-|IMMT-212|IMMT|1520|protein_coding|	protein_coding	-0.23863	0.647485	-1.42	0.0460899
INCENP	ENST00000278849.4|ENSG00000149503.12|OTTHUMG00000167470.4|OTTHUMT00000394850.1|INCENP-201|INCENP|3698|protein_coding|	protein_coding	1.12163	1.11634e-09	0.690309	0.0109896
ING3	ENST00000497502.1|ENSG00000071243.15|OTTHUMG00000141270.3|OTTHUMT00000318627.1|ING3-206|ING3|698|retained_intron|	retained_intron	-0.72483	0.140459	-1.83367	0.0178976
INPP5A	ENST00000445580.1|ENSG00000068383.18|OTTHUMG00000019293.5|OTTHUMT00000051091.1|INPP5A-205|INPP5A|610|protein_coding|	protein_coding	-0.773473	0.188856	1.77099	0.000395966
INS-IGF2	ENST00000641326.1|ENSG00000129965.14|OTTHUMG00000166213.2|OTTHUMT00000365950.2|INS-IGF2-205|INS-IGF2|2861|protein_coding|	protein_coding	-0.881541	0.582769	4.8942	1.24354e-06
INTS11	ENST00000525769.5|ENSG00000127054.20|OTTHUMG00000003330.13|OTTHUMT00000383032.1|INTS11-228|INTS11|695|retained_intron|	retained_intron	-0.969601	0.0610829	1.56059	0.0290229
INTS11	ENST00000485710.5|ENSG00000127054.20|OTTHUMG00000003330.13|OTTHUMT00000009381.1|INTS11-217|INTS11|883|retained_intron|	retained_intron	0.0441204	0.951135	2.22875	4.62565e-05
IP6K1	ENST00000479464.1|ENSG00000176095.11|OTTHUMG00000158197.1|OTTHUMT00000350384.1|IP6K1-205|IP6K1|562|processed_transcript|	processed_transcript	-0.0237602	0.974528	-3.22616	0.00162523
IP6K1	ENST00000460540.1|ENSG00000176095.11|OTTHUMG00000158197.1|OTTHUMT00000350382.1|IP6K1-203|IP6K1|1260|protein_coding|	protein_coding	1.13253	0.123473	3.09562	5.76218e-05
IP6K2	ENST00000454335.5|ENSG00000068745.14|OTTHUMG00000133543.6|OTTHUMT00000344884.2|IP6K2-224|IP6K2|631|protein_coding|	protein_coding	-0.259161	0.676907	1.45519	0.023383
IPO5	ENST00000468620.1|ENSG00000065150.18|OTTHUMG00000017244.6|OTTHUMT00000354677.1|IPO5-207|IPO5|480|retained_intron|	retained_intron	-1.23645	0.0545092	-2.26447	0.0245326
IQCE	ENST00000623361.3|ENSG00000106012.17|OTTHUMG00000152047.8|-|IQCE-217|IQCE|6775|protein_coding|	protein_coding	-1.40996	0.180217	2.22219	0.00583587
IQGAP2	ENST00000505766.5|ENSG00000145703.15|OTTHUMG00000162432.2|OTTHUMT00000368879.2|IQGAP2-209|IQGAP2|4255|protein_coding|	protein_coding	0.850234	0.356068	3.0814	0.000861362
IQSEC2	ENST00000498281.2|ENSG00000124313.13|OTTHUMG00000021608.6|OTTHUMT00000056746.2|IQSEC2-205|IQSEC2|673|protein_coding|	protein_coding	0.256987	0.699319	1.91981	0.00522581
IQSEC2	ENST00000462054.6|ENSG00000124313.13|OTTHUMG00000021608.6|OTTHUMT00000492382.1|IQSEC2-203|IQSEC2|730|processed_transcript|	processed_transcript	-0.137911	0.821363	1.98002	0.00343271
IRAK1	ENST00000455690.5|ENSG00000184216.13|OTTHUMG00000024228.45|OTTHUMT00000129556.1|IRAK1-210|IRAK1|784|protein_coding|	protein_coding	1.13122	0.018503	1.52817	0.0195269
IRAK1	ENST00000444230.5|ENSG00000184216.13|OTTHUMG00000024228.45|OTTHUMT00000130132.1|IRAK1-208|IRAK1|1125|protein_coding|	protein_coding	-1.44856	0.131664	2.08245	0.0123147
IRF3	ENST00000599144.5|ENSG00000126456.15|OTTHUMG00000183287.2|OTTHUMT00000465969.1|IRF3-222|IRF3|1117|protein_coding|	protein_coding	1.81713	0.00515398	2.07628	0.0300624
IRX1	ENST00000302006.3|ENSG00000170549.3|OTTHUMG00000161632.1|OTTHUMT00000365546.1|IRX1-201|IRX1|1858|protein_coding|	protein_coding	-1.29669	4.11814e-21	0.37174	0.0112449
ISG20	ENST00000379224.9|ENSG00000172183.14|OTTHUMG00000148679.3|OTTHUMT00000415509.1|ISG20-202|ISG20|540|protein_coding|	protein_coding	0.632322	0.116924	-2.15395	0.00249464
IST1	ENST00000539186.5|ENSG00000182149.20|OTTHUMG00000137597.8|OTTHUMT00000399581.3|IST1-216|IST1|542|protein_coding|	protein_coding	0.0460393	0.963849	2.24521	0.00481625
IST1	ENST00000538565.5|ENSG00000182149.20|OTTHUMG00000137597.8|OTTHUMT00000399576.3|IST1-213|IST1|1245|processed_transcript|	processed_transcript	0.540418	0.50098	2.30164	0.0156834
ISYNA1	ENST00000338128.12|ENSG00000105655.18|OTTHUMG00000179027.9|OTTHUMT00000444469.2|ISYNA1-201|ISYNA1|2420|protein_coding|	protein_coding	0.261555	0.59604	1.81165	0.00010359
ISYNA1	ENST00000457269.8|ENSG00000105655.18|OTTHUMG00000179027.9|OTTHUMT00000444470.2|ISYNA1-202|ISYNA1|1703|protein_coding|	protein_coding	-0.41277	0.449807	1.21554	0.048272
ITCH	ENST00000483727.5|ENSG00000078747.14|OTTHUMG00000032300.3|OTTHUMT00000078786.1|ITCH-205|ITCH|1070|processed_transcript|	processed_transcript	0.288988	0.646774	-1.83416	0.0470664
ITFG1	ENST00000565262.1|ENSG00000129636.12|OTTHUMG00000133103.5|OTTHUMT00000430401.2|ITFG1-208|ITFG1|584|protein_coding|	protein_coding	-0.00731427	0.989564	-2.23323	0.0462855
ITFG2	ENST00000534935.5|ENSG00000111203.11|OTTHUMG00000130617.3|OTTHUMT00000398189.1|ITFG2-202|ITFG2|715|nonsense_mediated_decay|	nonsense_mediated_decay	0.157888	0.809008	-2.05279	0.0193278
ITGA6	ENST00000475302.1|ENSG00000091409.14|OTTHUMG00000132277.5|OTTHUMT00000333830.1|ITGA6-210|ITGA6|577|retained_intron|	retained_intron	0.385644	0.553881	2.051	0.00203536
ITGB2	ENST00000397850.6|ENSG00000160255.17|OTTHUMG00000090257.9|OTTHUMT00000206566.3|ITGB2-205|ITGB2|3178|protein_coding|	protein_coding	-0.112069	0.8829	2.01607	0.0175173
ITGB4	ENST00000584374.1|ENSG00000132470.13|OTTHUMG00000179814.3|OTTHUMT00000448341.1|ITGB4-211|ITGB4|950|processed_transcript|	processed_transcript	0.147219	0.727898	1.46464	0.000540385
ITM2A	ENST00000469541.5|ENSG00000078596.10|OTTHUMG00000021900.1|OTTHUMT00000057330.1|ITM2A-205|ITM2A|879|processed_transcript|	processed_transcript	-1.97938	7.42707e-31	-0.559046	0.000489382
ITM2C	ENST00000409704.6|ENSG00000135916.15|OTTHUMG00000133219.4|OTTHUMT00000397049.1|ITM2C-204|ITM2C|1106|protein_coding|	protein_coding	0.221385	0.790808	2.40195	0.00165999
ITM2C	ENST00000457215.5|ENSG00000135916.15|OTTHUMG00000133219.4|OTTHUMT00000332589.2|ITM2C-206|ITM2C|763|protein_coding|	protein_coding	-0.289835	0.632193	2.27119	0.000229944
ITPK1	ENST00000556954.5|ENSG00000100605.16|OTTHUMG00000171226.4|OTTHUMT00000412675.1|ITPK1-211|ITPK1|697|processed_transcript|	processed_transcript	0.390772	0.666169	1.9407	0.0366278
ITPK1	ENST00000553655.1|ENSG00000100605.16|OTTHUMG00000171226.4|OTTHUMT00000412682.1|ITPK1-204|ITPK1|390|processed_transcript|	processed_transcript	0.609763	0.404117	2.68311	5.534e-05
JAM3	ENST00000534549.5|ENSG00000166086.12|OTTHUMG00000167130.6|OTTHUMT00000393309.4|JAM3-208|JAM3|385|protein_coding|	protein_coding	-0.760859	0.0721129	1.21312	0.00234684
JKAMP	ENST00000556985.5|ENSG00000050130.17|OTTHUMG00000171054.3|OTTHUMT00000411436.1|JKAMP-212|JKAMP|592|protein_coding|	protein_coding	0.960479	0.137164	2.19631	0.00634965
JKAMP	ENST00000553941.5|ENSG00000050130.17|OTTHUMG00000171054.3|OTTHUMT00000411439.1|JKAMP-206|JKAMP|1191|retained_intron|	retained_intron	0.87003	0.215495	1.73027	0.0452688
JMJD6	ENST00000591460.1|ENSG00000070495.14|OTTHUMG00000169267.3|OTTHUMT00000450990.1|JMJD6-207|JMJD6|667|retained_intron|	retained_intron	0.115221	0.857563	1.71481	0.00190082
JTB	ENST00000368589.5|ENSG00000143543.14|OTTHUMG00000036590.3|OTTHUMT00000090419.1|JTB-203|JTB|1216|protein_coding|	protein_coding	0.356303	0.563503	1.82728	0.0196844
JUND	ENST00000600972.1|ENSG00000130522.5|OTTHUMG00000183355.5|OTTHUMT00000466319.5|JUND-202|JUND|500|protein_coding|	protein_coding	-0.245387	0.768698	2.21489	0.00297795
KANK1	ENST00000382289.6|ENSG00000107104.18|OTTHUMG00000019434.6|OTTHUMT00000051486.2|KANK1-203|KANK1|1926|protein_coding|	protein_coding	-2.10283	3.938e-11	-0.798323	0.0496639
KANSL1	ENST00000639150.1|ENSG00000120071.13|OTTHUMG00000178026.9|OTTHUMT00000492449.1|KANSL1-223|KANSL1|1815|protein_coding|	protein_coding	0.468125	0.436031	1.57004	0.0202896
KAT5	ENST00000525600.1|ENSG00000172977.12|OTTHUMG00000166617.4|OTTHUMT00000390922.1|KAT5-205|KAT5|512|retained_intron|	retained_intron	-0.486866	0.325628	-1.93121	0.00870864
KCNA2	ENST00000633222.1|ENSG00000177301.14|OTTHUMG00000011567.9|OTTHUMT00000128001.3|KCNA2-205|KCNA2|11877|protein_coding|	protein_coding	-0.738737	0.39796	2.53696	0.000317009
KCNJ18	ENST00000567955.3|ENSG00000260458.3|OTTHUMG00000175863.1|OTTHUMT00000431196.1|KCNJ18-201|KCNJ18|2196|protein_coding|	protein_coding	1.97799	1.5112e-15	0.869745	0.0188297
KCTD1	ENST00000317932.11|ENSG00000134504.12|OTTHUMG00000131947.5|-|KCTD1-201|KCTD1|1715|protein_coding|	protein_coding	1.17345	0.017635	2.25316	0.000143482
KCTD1	ENST00000417602.5|ENSG00000134504.12|OTTHUMG00000131947.5|-|KCTD1-203|KCTD1|1705|protein_coding|	protein_coding	0.0295005	0.965097	-3.31963	0.0114376
KCTD1	ENST00000582494.1|ENSG00000134504.12|OTTHUMG00000131947.5|OTTHUMT00000446268.2|KCTD1-210|KCTD1|509|processed_transcript|	processed_transcript	-1.09081	0.0477504	1.53053	0.00522981
KCTD10	ENST00000542262.5|ENSG00000110906.12|OTTHUMG00000169253.4|OTTHUMT00000403111.2|KCTD10-213|KCTD10|554|protein_coding|	protein_coding	1.86684	0.0113619	2.34769	0.0165647
KCTD17	ENST00000478231.5|ENSG00000100379.17|OTTHUMG00000150532.3|OTTHUMT00000318787.1|KCTD17-207|KCTD17|584|retained_intron|	retained_intron	-0.0973085	0.866978	3.23802	6.64283e-09
KDM2B	ENST00000536036.1|ENSG00000089094.18|OTTHUMG00000169071.4|OTTHUMT00000402135.1|KDM2B-204|KDM2B|500|retained_intron|	retained_intron	0.284735	0.539593	1.36123	0.00591316
KDM4B	ENST00000536461.5|ENSG00000127663.14|OTTHUMG00000180281.4|OTTHUMT00000450560.2|KDM4B-203|KDM4B|5027|protein_coding|	protein_coding	1.83695	0.0105107	2.12614	0.0496333
KDM5D	ENST00000415360.1|ENSG00000012817.15|OTTHUMG00000036508.3|OTTHUMT00000088798.2|KDM5D-203|KDM5D|880|protein_coding|	protein_coding	0.462674	0.623507	1.91585	0.0432224
KDSR	ENST00000592327.1|ENSG00000119537.15|OTTHUMG00000132792.5|OTTHUMT00000450818.2|KDSR-212|KDSR|553|protein_coding|	protein_coding	1.03769	0.0960809	2.2348	0.00136854
KEAP1	ENST00000592055.2|ENSG00000079999.13|OTTHUMG00000180579.4|OTTHUMT00000452007.2|KEAP1-209|KEAP1|979|protein_coding|	protein_coding	0.3775	0.11749	1.10312	0.000128392
KHNYN	ENST00000553935.5|ENSG00000100441.9|OTTHUMG00000171312.4|OTTHUMT00000412930.1|KHNYN-202|KHNYN|3359|protein_coding|	protein_coding	1.63162	0.000820138	1.54263	0.0304678
KHNYN	ENST00000554268.1|ENSG00000100441.9|OTTHUMG00000171312.4|OTTHUMT00000412932.1|KHNYN-203|KHNYN|760|protein_coding|	protein_coding	0.388474	0.346	-2.16289	0.0309975
KIAA0391	ENST00000557404.3|ENSG00000100890.15|OTTHUMG00000170997.8|OTTHUMT00000411152.4|KIAA0391-204|KIAA0391|789|protein_coding|	protein_coding	0.25382	0.708823	2.10032	0.0066655
KIAA1191	ENST00000614420.4|ENSG00000122203.14|OTTHUMG00000130656.4|-|KIAA1191-212|KIAA1191|2631|protein_coding|	protein_coding	-0.489021	0.41016	1.51722	0.0159015
KIAA1217	ENST00000396446.5|ENSG00000120549.17|OTTHUMG00000017824.7|OTTHUMT00000316959.1|KIAA1217-208|KIAA1217|3059|protein_coding|	protein_coding	3.41366	1.55522e-06	2.4777	0.019793
KIAA1217	ENST00000430453.6|ENSG00000120549.17|OTTHUMG00000017824.7|-|KIAA1217-209|KIAA1217|5962|protein_coding|	protein_coding	-1.67783	0.00187094	-2.24583	0.006126
KIAA2026	ENST00000513355.2|ENSG00000183354.11|OTTHUMG00000019507.6|OTTHUMT00000400996.2|KIAA2026-205|KIAA2026|1967|protein_coding|	protein_coding	0.377612	0.561889	1.7517	0.0063741
KIF22	ENST00000568312.1|ENSG00000079616.12|OTTHUMG00000097771.5|OTTHUMT00000435533.2|KIF22-207|KIF22|781|nonsense_mediated_decay|	nonsense_mediated_decay	-1.20693	0.0753494	2.32719	0.000273871
KIF22	ENST00000570173.5|ENSG00000079616.12|OTTHUMG00000097771.5|OTTHUMT00000435527.1|KIF22-210|KIF22|562|nonsense_mediated_decay|	nonsense_mediated_decay	0.884048	0.168117	3.42416	4.59939e-07
KIZ	ENST00000620891.4|ENSG00000088970.15|OTTHUMG00000032020.5|OTTHUMT00000078268.3|KIZ-213|KIZ|2014|protein_coding|	protein_coding	-0.937649	0.218326	1.61727	0.0158697
KLF13	ENST00000558673.1|ENSG00000169926.10|OTTHUMG00000172224.4|OTTHUMT00000417399.1|KLF13-204|KLF13|447|processed_transcript|	processed_transcript	-1.20479	0.171495	1.85876	0.0144527
KLF2	ENST00000592003.1|ENSG00000127528.5|OTTHUMG00000182330.1|OTTHUMT00000460563.1|KLF2-202|KLF2|564|protein_coding|	protein_coding	-0.782102	0.114944	1.36845	0.0101941
KLF4	ENST00000374672.4|ENSG00000136826.14|OTTHUMG00000020449.3|OTTHUMT00000053556.2|KLF4-201|KLF4|2813|protein_coding|	protein_coding	-0.0498271	0.963849	2.23795	0.0335415
KLF8	ENST00000358094.7|ENSG00000102349.17|OTTHUMG00000021666.3|OTTHUMT00000056888.3|KLF8-201|KLF8|1908|nonsense_mediated_decay|	nonsense_mediated_decay	0.0013982	0.9978	-2.00924	0.0316622
KLHDC4	ENST00000622456.4|ENSG00000104731.13|OTTHUMG00000137657.3|-|KLHDC4-227|KLHDC4|1422|protein_coding|	protein_coding	0.543632	0.32852	-2.30162	0.0118012
KLHDC4	ENST00000566349.5|ENSG00000104731.13|OTTHUMG00000137657.3|OTTHUMT00000431850.1|KLHDC4-215|KLHDC4|1377|processed_transcript|	processed_transcript	0.211131	0.787915	1.67989	0.0230906
KLHL21	ENST00000496707.5|ENSG00000162413.16|OTTHUMG00000001437.3|OTTHUMT00000004192.3|KLHL21-205|KLHL21|824|protein_coding|	protein_coding	0.678782	0.219123	1.78745	0.00546608
KLHL24	ENST00000492409.2|ENSG00000114796.15|OTTHUMG00000156911.5|OTTHUMT00000350147.1|KLHL24-214|KLHL24|530|processed_transcript|	processed_transcript	-0.470538	0.203723	-1.58924	0.0138913
KLHL26	ENST00000596843.1|ENSG00000167487.11|OTTHUMG00000183114.3|OTTHUMT00000465150.1|KLHL26-204|KLHL26|541|processed_transcript|	processed_transcript	-0.599322	0.170168	1.6999	1.40733e-05
KLHL36	ENST00000258157.9|ENSG00000135686.12|OTTHUMG00000137642.3|OTTHUMT00000433654.1|KLHL36-201|KLHL36|1974|protein_coding|	protein_coding	-0.267247	0.766649	2.26781	0.0150302
KMT5B	ENST00000405515.5|ENSG00000110066.14|OTTHUMG00000150484.7|OTTHUMT00000318321.2|KMT5B-206|KMT5B|2869|protein_coding|	protein_coding	-0.0795893	0.929558	1.98549	0.00613604
KREMEN2	ENST00000575769.1|ENSG00000131650.13|OTTHUMG00000128976.2|OTTHUMT00000436499.1|KREMEN2-205|KREMEN2|1922|protein_coding|	protein_coding	0.346102	0.606095	2.03392	0.011541
KREMEN2	ENST00000575885.5|ENSG00000131650.13|OTTHUMG00000128976.2|OTTHUMT00000436497.1|KREMEN2-206|KREMEN2|1798|protein_coding|	protein_coding	-0.2771	0.561414	-1.37513	0.0367622
KREMEN2	ENST00000319500.10|ENSG00000131650.13|OTTHUMG00000128976.2|OTTHUMT00000250965.2|KREMEN2-202|KREMEN2|1882|protein_coding|	protein_coding	-1.41492	0.0495122	1.90749	0.00274736
KRT1	ENST00000548765.1|ENSG00000167768.4|OTTHUMG00000169749.1|OTTHUMT00000405707.1|KRT1-202|KRT1|571|retained_intron|	retained_intron	0.359281	0.409704	1.72684	0.000626773
KRT15	ENST00000458290.5|ENSG00000171346.15|OTTHUMG00000133435.5|OTTHUMT00000257904.2|KRT15-204|KRT15|903|protein_coding|	protein_coding	-1.50805	3.46607e-14	0.734877	0.000961428
KRT23	ENST00000582754.5|ENSG00000108244.16|OTTHUMG00000133376.5|OTTHUMT00000448167.1|KRT23-207|KRT23|1567|retained_intron|	retained_intron	0.273447	0.592742	1.42799	0.0123468
KRT40	ENST00000377755.8|ENSG00000204889.10|OTTHUMG00000133596.4|-|KRT40-201|KRT40|1812|protein_coding|	protein_coding	-0.965121	0.221931	2.10675	0.0161959
KRT5	ENST00000549420.1|ENSG00000186081.11|OTTHUMG00000169657.3|OTTHUMT00000405320.2|KRT5-205|KRT5|611|protein_coding|	protein_coding	0.849604	5.41898e-06	1.03068	5.1001e-05
KRT5	ENST00000549511.5|ENSG00000186081.11|OTTHUMG00000169657.3|OTTHUMT00000405314.1|KRT5-206|KRT5|809|retained_intron|	retained_intron	0.603772	0.00135732	1.18652	1.63011e-06
KRT7	ENST00000549127.5|ENSG00000135480.15|OTTHUMG00000169580.1|OTTHUMT00000404905.1|KRT7-207|KRT7|329|processed_transcript|	processed_transcript	0.0971164	0.890503	2.32419	4.98076e-05
KRT78	ENST00000547920.1|ENSG00000170423.12|OTTHUMG00000169880.2|OTTHUMT00000406381.2|KRT78-204|KRT78|458|protein_coding|	protein_coding	1.12877	0.00232009	-1.88627	0.0409336
KRTCAP3	ENST00000543753.5|ENSG00000157992.12|OTTHUMG00000097782.2|-|KRTCAP3-207|KRTCAP3|956|protein_coding|	protein_coding	1.22816	0.0525349	2.12662	0.00384987
KSR1	ENST00000398982.6|ENSG00000141068.13|OTTHUMG00000132051.11|OTTHUMT00000445103.2|KSR1-202|KSR1|2048|protein_coding|	protein_coding	0.845726	0.178956	1.595	0.0350247
KTN1	ENST00000554507.5|ENSG00000126777.17|OTTHUMG00000140312.6|OTTHUMT00000411460.1|KTN1-214|KTN1|2057|protein_coding|	protein_coding	-2.00682	0.00165144	-3.03118	0.00942587
KXD1	ENST00000599319.5|ENSG00000105700.10|OTTHUMG00000183107.3|OTTHUMT00000465104.1|KXD1-211|KXD1|707|protein_coding|	protein_coding	1.03178	0.352052	4.73216	3.70767e-07
L1CAM	ENST00000361699.8|ENSG00000198910.12|OTTHUMG00000024221.14|OTTHUMT00000061095.1|L1CAM-201|L1CAM|3888|protein_coding|	protein_coding	-0.212606	0.872487	3.18293	0.00134975
L3MBTL3	ENST00000368139.6|ENSG00000198945.7|OTTHUMG00000015554.5|OTTHUMT00000390161.1|L3MBTL3-203|L3MBTL3|4148|protein_coding|	protein_coding	-0.593232	0.448843	1.53323	0.0367015
LAD1	ENST00000631576.1|ENSG00000159166.13|OTTHUMG00000035737.4|OTTHUMT00000487871.2|LAD1-206|LAD1|550|protein_coding|	protein_coding	0.272989	0.696582	2.38753	0.00286387
LAIR1	ENST00000348231.8|ENSG00000167613.15|OTTHUMG00000065545.12|OTTHUMT00000140508.3|LAIR1-201|LAIR1|1467|protein_coding|	protein_coding	1.17052	0.00110377	1.2412	0.0140352
LAMB2	ENST00000486298.5|ENSG00000172037.13|OTTHUMG00000156807.4|OTTHUMT00000345953.1|LAMB2-213|LAMB2|590|processed_transcript|	processed_transcript	-1.41004	0.0133085	-2.81733	0.0126122
LAMB2	ENST00000477701.1|ENSG00000172037.13|OTTHUMG00000156807.4|OTTHUMT00000345982.1|LAMB2-208|LAMB2|559|retained_intron|	retained_intron	-0.568271	0.35945	-2.05849	0.0210362
LAMB3	ENST00000455193.1|ENSG00000196878.14|OTTHUMG00000036360.4|OTTHUMT00000088728.2|LAMB3-205|LAMB3|710|protein_coding|	protein_coding	0.463087	0.484047	2.64612	3.12656e-05
LAMC3	ENST00000462567.1|ENSG00000050555.17|OTTHUMG00000020819.4|OTTHUMT00000054715.1|LAMC3-203|LAMC3|801|processed_transcript|	processed_transcript	-1.19025	1.90506e-16	0.374729	0.022543
LAMP1	ENST00000471046.1|ENSG00000185896.10|OTTHUMG00000017380.2|OTTHUMT00000045877.1|LAMP1-202|LAMP1|424|processed_transcript|	processed_transcript	0.700966	0.433889	2.75761	0.00261056
LAMTOR1	ENST00000539797.5|ENSG00000149357.9|OTTHUMG00000167869.1|OTTHUMT00000396736.1|LAMTOR1-205|LAMTOR1|535|processed_transcript|	processed_transcript	0.375177	0.631451	2.99524	1.39396e-05
LAMTOR4	ENST00000488241.5|ENSG00000188186.10|OTTHUMG00000154854.8|OTTHUMT00000337392.3|LAMTOR4-209|LAMTOR4|613|protein_coding|	protein_coding	-0.59901	0.371414	3.8956	7.23603e-13
LAMTOR4	ENST00000460732.5|ENSG00000188186.10|OTTHUMG00000154854.8|OTTHUMT00000337375.3|LAMTOR4-203|LAMTOR4|616|protein_coding|	protein_coding	-1.1041	0.0723171	-4.15024	1.90303e-05
LAMTOR4	ENST00000466498.2|ENSG00000188186.10|OTTHUMG00000154854.8|OTTHUMT00000338519.3|LAMTOR4-204|LAMTOR4|371|protein_coding|	protein_coding	-1.981	0.000139449	-1.65743	0.0385664
LAMTOR5	ENST00000483260.5|ENSG00000134248.13|OTTHUMG00000011568.5|OTTHUMT00000035929.3|LAMTOR5-204|LAMTOR5|694|protein_coding|	protein_coding	-0.00135196	0.996109	-1.15582	0.00210703
LAMTOR5	ENST00000614544.1|ENSG00000134248.13|OTTHUMG00000011568.5|-|LAMTOR5-208|LAMTOR5|846|protein_coding|	protein_coding	-0.234081	0.705837	1.79117	0.000614533
LANCL1	ENST00000412863.1|ENSG00000115365.11|OTTHUMG00000132991.6|OTTHUMT00000336822.3|LANCL1-202|LANCL1|441|protein_coding|	protein_coding	0.965421	0.10553	1.76927	0.0211177
LARGE2	ENST00000530437.5|ENSG00000165905.17|OTTHUMG00000167037.1|OTTHUMT00000392577.1|LARGE2-207|LARGE2|1474|retained_intron|	retained_intron	-0.110658	0.853972	1.27868	0.0400449
LARP4	ENST00000293618.12|ENSG00000161813.21|OTTHUMG00000163724.13|-|LARP4-201|LARP4|6296|protein_coding|	protein_coding	-0.681582	0.468924	2.54786	0.00253842
LARP7	ENST00000344442.9|ENSG00000174720.15|OTTHUMG00000132909.5|OTTHUMT00000256417.2|LARP7-202|LARP7|2286|protein_coding|	protein_coding	-0.0764499	0.938085	1.89295	0.0217767
LDHA	ENST00000227157.8|ENSG00000134333.13|OTTHUMG00000167721.3|OTTHUMT00000258174.2|LDHA-201|LDHA|1887|protein_coding|	protein_coding	1.0238	0.000437548	-1.15589	0.0339475
LDHA	ENST00000422447.7|ENSG00000134333.13|OTTHUMG00000167721.3|OTTHUMT00000258172.2|LDHA-205|LDHA|2416|protein_coding|	protein_coding	0.689286	0.00566996	1.09072	0.000991417
LDLR	ENST00000558518.5|ENSG00000130164.13|OTTHUMG00000171935.8|OTTHUMT00000415973.2|LDLR-208|LDLR|3617|protein_coding|	protein_coding	2.13308	3.75741e-19	0.779628	0.0263779
LDLR	ENST00000455727.6|ENSG00000130164.13|OTTHUMG00000171935.8|OTTHUMT00000415976.1|LDLR-202|LDLR|2333|protein_coding|	protein_coding	1.30597	0.102179	2.6203	0.00228569
LDOC1	ENST00000460721.1|ENSG00000182195.7|OTTHUMG00000022558.2|OTTHUMT00000058593.2|LDOC1-202|LDOC1|784|processed_transcript|	processed_transcript	-0.078007	0.926208	-3.14911	0.0422502
LEMD2	ENST00000421671.6|ENSG00000161904.11|OTTHUMG00000014535.7|OTTHUMT00000370186.1|LEMD2-202|LEMD2|2323|nonsense_mediated_decay|	nonsense_mediated_decay	0.350302	0.693236	2.00379	0.0269218
LENG8	ENST00000443957.5|ENSG00000167615.16|OTTHUMG00000065548.14|OTTHUMT00000140525.3|LENG8-206|LENG8|463|protein_coding|	protein_coding	1.32099	0.00852905	1.73895	0.0156834
LENG8	ENST00000376514.6|ENSG00000167615.16|OTTHUMG00000065548.14|OTTHUMT00000156163.8|LENG8-202|LENG8|5146|protein_coding|	protein_coding	0.990548	0.236271	2.69166	0.00352739
LEPR	ENST00000371059.7|ENSG00000116678.19|OTTHUMG00000009115.1|OTTHUMT00000025277.1|LEPR-204|LEPR|3079|protein_coding|	protein_coding	-1.21759	0.00162799	-1.66025	0.009617
LEPROTL1	ENST00000520739.5|ENSG00000104660.17|OTTHUMG00000163820.4|OTTHUMT00000375848.1|LEPROTL1-207|LEPROTL1|559|nonsense_mediated_decay|	nonsense_mediated_decay	0.930817	4.24555e-06	-1.30309	0.000557879
LETM1	ENST00000511977.1|ENSG00000168924.14|OTTHUMG00000121149.4|OTTHUMT00000358345.1|LETM1-205|LETM1|746|retained_intron|	retained_intron	1.30973	1.16597e-05	0.947604	0.0365742
LGALS3BP	ENST00000586720.5|ENSG00000108679.12|OTTHUMG00000177572.7|OTTHUMT00000437790.1|LGALS3BP-204|LGALS3BP|1736|nonsense_mediated_decay|	nonsense_mediated_decay	1.21817	0.000913878	-3.21817	0.00110664
LGALS3BP	ENST00000589906.5|ENSG00000108679.12|OTTHUMG00000177572.7|OTTHUMT00000437906.2|LGALS3BP-216|LGALS3BP|540|protein_coding|	protein_coding	1.28299	0.050183	1.9948	0.0320538
LGALS3BP	ENST00000262776.7|ENSG00000108679.12|OTTHUMG00000177572.7|OTTHUMT00000437785.3|LGALS3BP-201|LGALS3BP|2405|protein_coding|	protein_coding	1.24095	1.10892e-16	0.451416	0.043485
LGALS3BP	ENST00000587311.5|ENSG00000108679.12|OTTHUMG00000177572.7|OTTHUMT00000437784.1|LGALS3BP-207|LGALS3BP|1905|nonsense_mediated_decay|	nonsense_mediated_decay	1.4425	5.1826e-21	0.629213	0.00215987
LGALS9	ENST00000584661.5|ENSG00000168961.16|OTTHUMG00000179831.14|OTTHUMT00000448419.3|LGALS9-216|LGALS9|594|protein_coding|	protein_coding	0.739384	0.215	1.6931	0.0146382
LHX2	ENST00000446480.5|ENSG00000106689.10|OTTHUMG00000020647.5|OTTHUMT00000054011.1|LHX2-202|LHX2|1414|protein_coding|	protein_coding	-0.946751	0.0461089	1.53421	0.000217609
LHX2	ENST00000560961.2|ENSG00000106689.10|OTTHUMG00000020647.5|OTTHUMT00000415662.4|LHX2-204|LHX2|471|protein_coding|	protein_coding	-1.09099	0.000623315	0.912438	0.00518058
LIG1	ENST00000594067.5|ENSG00000105486.13|OTTHUMG00000183187.2|OTTHUMT00000465581.1|LIG1-206|LIG1|2697|retained_intron|	retained_intron	-0.427735	0.681496	2.25997	0.0123514
LIG3	ENST00000590630.5|ENSG00000005156.11|OTTHUMG00000128519.6|OTTHUMT00000448353.1|LIG3-213|LIG3|904|retained_intron|	retained_intron	0.399503	0.410549	1.56312	0.00234764
LIMD2	ENST00000578061.5|ENSG00000136490.8|OTTHUMG00000178907.2|OTTHUMT00000443883.1|LIMD2-202|LIMD2|756|protein_coding|	protein_coding	1.91309	3.5737e-05	1.92652	0.00163162
LIMS2	ENST00000545738.6|ENSG00000072163.19|OTTHUMG00000131529.6|OTTHUMT00000331106.2|LIMS2-217|LIMS2|1730|protein_coding|	protein_coding	-1.38211	0.0143904	1.10801	0.0353589
LIN7B	ENST00000391864.7|ENSG00000104863.11|OTTHUMG00000134288.3|OTTHUMT00000258981.1|LIN7B-202|LIN7B|582|protein_coding|	protein_coding	0.119607	0.826317	1.1176	0.0385306
LINC01001	ENST00000607448.5|ENSG00000230724.9|OTTHUMG00000165114.4|OTTHUMT00000471059.1|LINC01001-203|LINC01001|1569|lincRNA|	lincRNA	-0.759564	0.312103	1.67661	0.0434487
LINC01002	ENST00000632405.1|ENSG00000282508.1|OTTHUMG00000188608.4|OTTHUMT00000475126.1|LINC01002-217|LINC01002|600|lincRNA|	lincRNA	0.361605	0.563817	1.76959	0.0177581
LINC01229	ENST00000568751.1|ENSG00000260876.5|OTTHUMG00000176975.1|OTTHUMT00000434549.1|LINC01229-204|LINC01229|720|lincRNA|	lincRNA	-3.38849	5.79998e-19	-0.928555	0.0344699
LINC01278	ENST00000610088.5|ENSG00000235437.7|OTTHUMG00000021699.2|OTTHUMT00000471672.1|LINC01278-206|LINC01278|554|sense_overlapping|	sense_overlapping	-0.165232	0.751377	1.04953	0.0388249
LINC01550	ENST00000556138.1|ENSG00000246223.8|OTTHUMG00000171470.2|OTTHUMT00000413588.1|LINC01550-205|LINC01550|538|lincRNA|	lincRNA	-1.54803	3.88874e-15	-0.627184	0.0044591
LINC01934	ENST00000435411.5|ENSG00000234663.5|OTTHUMG00000154205.2|OTTHUMT00000334384.2|LINC01934-205|LINC01934|1771|lincRNA|	lincRNA	0.307398	0.477545	-1.31336	0.0400507
LITAF	ENST00000381810.7|ENSG00000189067.12|OTTHUMG00000177415.6|-|LITAF-202|LITAF|1527|protein_coding|	protein_coding	0.258605	0.735115	1.93441	0.0076768
LITAF	ENST00000571627.5|ENSG00000189067.12|OTTHUMG00000177415.6|OTTHUMT00000436828.2|LITAF-208|LITAF|579|protein_coding|	protein_coding	-0.476208	0.676637	3.82059	1.47144e-05
LLGL1	ENST00000621229.1|ENSG00000131899.10|OTTHUMG00000059396.3|-|LLGL1-203|LLGL1|3187|protein_coding|	protein_coding	1.08433	0.0512791	1.66444	0.0235858
LLGL2	ENST00000545227.6|ENSG00000073350.13|OTTHUMG00000179685.2|OTTHUMT00000447641.1|LLGL2-204|LLGL2|3527|retained_intron|	retained_intron	1.4071	0.0175436	2.02786	0.0153083
LMAN2	ENST00000506310.1|ENSG00000169223.14|OTTHUMG00000130860.3|OTTHUMT00000372696.1|LMAN2-205|LMAN2|564|processed_transcript|	processed_transcript	0.811995	0.0641683	-3.87236	0.011842
LMNA	ENST00000368299.7|ENSG00000160789.19|OTTHUMG00000013961.5|OTTHUMT00000039196.1|LMNA-205|LMNA|2253|protein_coding|	protein_coding	1.55888	0.00145446	2.35151	0.000186504
LMNA	ENST00000361308.8|ENSG00000160789.19|OTTHUMG00000013961.5|-|LMNA-202|LMNA|1713|protein_coding|	protein_coding	1.27316	0.0341001	2.5282	0.000426177
LMNA	ENST00000368301.6|ENSG00000160789.19|OTTHUMG00000013961.5|OTTHUMT00000039194.3|LMNA-207|LMNA|2461|protein_coding|	protein_coding	-0.606244	0.274818	2.23281	8.27338e-06
LMNA	ENST00000347559.6|ENSG00000160789.19|OTTHUMG00000013961.5|-|LMNA-201|LMNA|3137|protein_coding|	protein_coding	-1.16633	0.0549743	-2.21231	0.0154763
LMNA	ENST00000448611.6|ENSG00000160789.19|OTTHUMG00000013961.5|OTTHUMT00000359799.1|LMNA-208|LMNA|1943|protein_coding|	protein_coding	-1.60735	0.000554376	1.43258	0.0045479
LMNA	ENST00000469565.6|ENSG00000160789.19|OTTHUMG00000013961.5|OTTHUMT00000359807.1|LMNA-210|LMNA|591|processed_transcript|	processed_transcript	1.81453	0.0981744	3.42749	0.00629401
LMNB2	ENST00000490554.5|ENSG00000176619.12|OTTHUMG00000150626.5|OTTHUMT00000319207.1|LMNB2-203|LMNB2|689|retained_intron|	retained_intron	0.177683	0.764565	1.46038	0.018368
LMO1	ENST00000524379.1|ENSG00000166407.13|OTTHUMG00000165833.2|OTTHUMT00000386505.1|LMO1-203|LMO1|785|retained_intron|	retained_intron	0.524966	0.188929	1.25774	0.00541477
LONP1	ENST00000589473.1|ENSG00000196365.11|OTTHUMG00000180504.4|OTTHUMT00000451669.2|LONP1-208|LONP1|793|protein_coding|	protein_coding	-0.489243	0.498507	1.65206	0.0167108
LPCAT4	ENST00000569804.2|ENSG00000176454.13|OTTHUMG00000172349.3|OTTHUMT00000422948.1|LPCAT4-208|LPCAT4|657|retained_intron|	retained_intron	-0.392555	0.208866	-1.11644	0.0333916
LPL	ENST00000520959.5|ENSG00000175445.14|OTTHUMG00000036645.7|OTTHUMT00000374962.2|LPL-203|LPL|560|protein_coding|	protein_coding	-0.180432	0.752296	2.13389	6.45766e-05
LRCH3	ENST00000483442.5|ENSG00000186001.12|OTTHUMG00000155378.3|OTTHUMT00000339978.1|LRCH3-217|LRCH3|562|retained_intron|	retained_intron	0.503034	0.291515	-2.62947	0.000442843
LRIG1	ENST00000383703.3|ENSG00000144749.13|OTTHUMG00000158727.1|OTTHUMT00000351931.1|LRIG1-202|LRIG1|5283|protein_coding|	protein_coding	-1.06341	0.0186562	1.10535	0.0203204
LRIG1	ENST00000495037.1|ENSG00000144749.13|OTTHUMG00000158727.1|OTTHUMT00000351934.1|LRIG1-205|LRIG1|2336|processed_transcript|	processed_transcript	0.0446777	0.954101	1.92165	0.00529579
LRIG3	ENST00000552646.1|ENSG00000139263.11|OTTHUMG00000169940.2|OTTHUMT00000406626.1|LRIG3-209|LRIG3|775|retained_intron|	retained_intron	-1.2934	0.0587926	1.7533	0.0149048
LRP10	ENST00000470660.1|ENSG00000197324.8|OTTHUMG00000028705.3|OTTHUMT00000071664.1|LRP10-202|LRP10|486|processed_transcript|	processed_transcript	0.528893	0.00514863	-1.54637	4.36843e-06
LRP4	ENST00000529604.1|ENSG00000134569.9|OTTHUMG00000166700.2|OTTHUMT00000391134.1|LRP4-203|LRP4|2774|retained_intron|	retained_intron	-1.13542	7.39653e-17	-0.370994	0.0357107
LRRC17	ENST00000249377.4|ENSG00000128606.12|OTTHUMG00000157210.3|OTTHUMT00000347929.1|LRRC17-201|LRRC17|2002|protein_coding|	protein_coding	-0.179639	0.817562	2.65044	3.50495e-05
LRRC25	ENST00000595840.1|ENSG00000175489.9|OTTHUMG00000183361.4|OTTHUMT00000466343.2|LRRC25-202|LRRC25|1924|protein_coding|	protein_coding	0.0788543	0.8871	1.1512	0.0381511
LRRC37B	ENST00000579766.1|ENSG00000185158.12|OTTHUMG00000132785.3|OTTHUMT00000446518.1|LRRC37B-209|LRRC37B|997|retained_intron|	retained_intron	-0.0304299	0.95601	-2.40816	0.00416069
LRRC37B	ENST00000582117.1|ENSG00000185158.12|OTTHUMG00000132785.3|OTTHUMT00000446517.1|LRRC37B-215|LRRC37B|764|protein_coding|	protein_coding	-0.40005	0.398993	1.4627	0.000627972
LRRC41	ENST00000343304.10|ENSG00000132128.16|OTTHUMG00000007810.7|-|LRRC41-201|LRRC41|2947|protein_coding|	protein_coding	1.08551	0.0981036	1.84357	0.0310039
LRRK1	ENST00000531270.5|ENSG00000154237.12|OTTHUMG00000165514.5|OTTHUMT00000384569.1|LRRK1-207|LRRK1|6015|nonsense_mediated_decay|	nonsense_mediated_decay	0.664024	0.393207	2.77367	0.000321979
LRSAM1	ENST00000483302.5|ENSG00000148356.13|OTTHUMG00000020701.2|OTTHUMT00000054168.1|LRSAM1-206|LRSAM1|1994|processed_transcript|	processed_transcript	-0.0861535	0.93481	2.66349	0.00425217
LSM14A	ENST00000540746.6|ENSG00000257103.8|OTTHUMG00000180491.7|OTTHUMT00000451575.2|LSM14A-202|LSM14A|2152|protein_coding|	protein_coding	1.42452	0.000686433	1.5767	0.00681858
LSM7	ENST00000587502.2|ENSG00000130332.14|OTTHUMG00000180441.4|OTTHUMT00000451373.2|LSM7-204|LSM7|575|protein_coding|	protein_coding	1.18624	2.31842e-06	1.30026	6.24683e-05
LSP1	ENST00000446808.5|ENSG00000130592.15|OTTHUMG00000012252.24|OTTHUMT00000315851.2|LSP1-210|LSP1|574|protein_coding|	protein_coding	-2.70499	2.54756e-09	1.09479	0.00922257
LTBP1	ENST00000415140.6|ENSG00000049323.15|OTTHUMG00000152118.14|OTTHUMT00000326294.3|LTBP1-206|LTBP1|799|protein_coding|	protein_coding	0.547588	0.257322	2.10127	0.000642082
LTBP3	ENST00000526124.1|ENSG00000168056.15|OTTHUMG00000166575.6|OTTHUMT00000390606.1|LTBP3-205|LTBP3|347|retained_intron|	retained_intron	-1.30038	6.4464e-13	-0.549293	0.0210868
LTBP3	ENST00000530866.5|ENSG00000168056.15|OTTHUMG00000166575.6|OTTHUMT00000390542.3|LTBP3-218|LTBP3|3756|protein_coding|	protein_coding	-4.15904	7.84684e-08	0.962417	0.0472751
LTBP4	ENST00000622457.1|ENSG00000090006.17|OTTHUMG00000182635.12|OTTHUMT00000463786.4|LTBP4-238|LTBP4|547|protein_coding|	protein_coding	-1.01388	0.000104723	-1.84919	9.22249e-06
LTBP4	ENST00000243562.13|ENSG00000090006.17|OTTHUMG00000182635.12|OTTHUMT00000462818.2|LTBP4-202|LTBP4|3140|protein_coding|	protein_coding	-1.55889	2.07105e-14	0.511806	0.0338127
LTBP4	ENST00000599225.1|ENSG00000090006.17|OTTHUMG00000182635.12|OTTHUMT00000463088.3|LTBP4-225|LTBP4|281|protein_coding|	protein_coding	-1.65874	5.61997e-06	1.19378	0.000890491
LTBR	ENST00000545445.1|ENSG00000111321.10|OTTHUMG00000168356.3|OTTHUMT00000399426.1|LTBR-214|LTBR|379|retained_intron|	retained_intron	1.15122	0.00877451	1.3855	0.0186206
LUC7L	ENST00000419516.5|ENSG00000007392.16|OTTHUMG00000060730.12|OTTHUMT00000134240.3|LUC7L-206|LUC7L|1211|nonsense_mediated_decay|	nonsense_mediated_decay	2.03584	0.00417216	3.14071	0.000129737
LUC7L2	ENST00000619796.4|ENSG00000146963.17|OTTHUMG00000185163.2|-|LUC7L2-210|LUC7L2|2783|protein_coding|	protein_coding	0.0226773	0.968045	1.20142	0.0351269
LUC7L2	ENST00000456182.5|ENSG00000146963.17|OTTHUMG00000185163.2|OTTHUMT00000323620.1|LUC7L2-204|LUC7L2|2411|nonsense_mediated_decay|	nonsense_mediated_decay	1.29586	0.00509814	1.47775	0.0237706
LUC7L3	ENST00000511068.1|ENSG00000108848.15|OTTHUMG00000162257.12|OTTHUMT00000368375.1|LUC7L3-218|LUC7L3|277|retained_intron|	retained_intron	-0.0416734	0.943625	-1.78986	0.0375645
LUZP6	ENST00000589735.1|ENSG00000267697.1|OTTHUMG00000180445.2|OTTHUMT00000451390.2|LUZP6-201|LUZP6|177|protein_coding|	protein_coding	-0.272367	0.0973348	-1.07272	9.71337e-06
LZTR1	ENST00000452988.5|ENSG00000099949.18|OTTHUMG00000150878.1|OTTHUMT00000320403.1|LZTR1-207|LZTR1|878|nonsense_mediated_decay|	nonsense_mediated_decay	-0.940871	0.167271	1.7304	0.0114207
LZTS2	ENST00000454422.1|ENSG00000107816.17|OTTHUMG00000018914.4|OTTHUMT00000049877.2|LZTS2-205|LZTS2|804|protein_coding|	protein_coding	0.8615	0.0283016	1.31943	0.0101886
LZTS3	ENST00000337576.6|ENSG00000088899.14|OTTHUMG00000031735.2|-|LZTS3-202|LZTS3|4238|protein_coding|	protein_coding	0.285391	0.560365	1.53748	0.00346998
LZTS3	ENST00000360342.7|ENSG00000088899.14|OTTHUMG00000031735.2|OTTHUMT00000252264.1|LZTS3-203|LZTS3|4055|protein_coding|	protein_coding	-0.774157	0.23123	-3.52953	0.0187769
LYAR	ENST00000343470.8|ENSG00000145220.13|OTTHUMG00000125477.19|OTTHUMT00000246800.3|LYAR-201|LYAR|1569|protein_coding|	protein_coding	1.32679	1.87812e-13	0.67321	0.0107574
LYNX1	ENST00000613110.4|ENSG00000180155.19|OTTHUMG00000191912.1|OTTHUMT00000379889.3|LYNX1-202|LYNX1|639|protein_coding|	protein_coding	0.0669503	0.9302	1.94267	0.0192601
LYPD3	ENST00000594326.1|ENSG00000124466.8|OTTHUMG00000182696.2|OTTHUMT00000463179.1|LYPD3-202|LYPD3|574|retained_intron|	retained_intron	1.11378	1.15686e-06	0.816243	0.0146545
LYPLA2	ENST00000374503.7|ENSG00000011009.10|OTTHUMG00000002961.4|OTTHUMT00000096556.1|LYPLA2-203|LYPLA2|868|protein_coding|	protein_coding	1.64308	4.10793e-06	1.29693	0.0135938
LYPLA2	ENST00000495365.5|ENSG00000011009.10|OTTHUMG00000002961.4|OTTHUMT00000096557.1|LYPLA2-210|LYPLA2|842|processed_transcript|	processed_transcript	1.12183	0.012553	1.30183	0.0436674
LYVE1	ENST00000438354.6|ENSG00000133800.8|OTTHUMG00000165713.1|OTTHUMT00000385894.1|LYVE1-202|LYVE1|1823|nonsense_mediated_decay|	nonsense_mediated_decay	-1.12496	5.68656e-10	-0.554361	0.0292964
LYZ	ENST00000549690.1|ENSG00000090382.6|OTTHUMG00000169342.2|OTTHUMT00000403659.1|LYZ-203|LYZ|669|protein_coding|	protein_coding	1.42121	3.08179e-18	-0.71433	0.0079133
MAD1L1	ENST00000429625.5|ENSG00000002822.15|OTTHUMG00000151493.5|OTTHUMT00000322874.2|MAD1L1-206|MAD1L1|750|protein_coding|	protein_coding	1.2006	0.0514514	1.96262	0.0139451
MAD1L1	ENST00000477172.1|ENSG00000002822.15|OTTHUMG00000151493.5|OTTHUMT00000322890.1|MAD1L1-218|MAD1L1|454|processed_transcript|	processed_transcript	-1.7118	0.00922692	1.90042	0.011541
MAEA	ENST00000503653.5|ENSG00000090316.15|OTTHUMG00000160169.7|OTTHUMT00000359527.5|MAEA-205|MAEA|845|protein_coding|	protein_coding	1.54529	0.008687	2.45507	0.000729004
MAEA	ENST00000509531.5|ENSG00000090316.15|OTTHUMG00000160169.7|OTTHUMT00000359530.1|MAEA-212|MAEA|1001|nonsense_mediated_decay|	nonsense_mediated_decay	1.21239	0.0252087	1.66667	0.023191
MAF	ENST00000569649.1|ENSG00000178573.6|OTTHUMG00000137621.3|OTTHUMT00000434545.1|MAF-203|MAF|1217|protein_coding|	protein_coding	0.427576	0.570771	2.39503	0.00139781
MAFF	ENST00000407965.1|ENSG00000185022.11|OTTHUMG00000151163.4|OTTHUMT00000321625.1|MAFF-202|MAFF|2325|protein_coding|	protein_coding	-1.43315	0.0172764	-2.67289	0.0389149
MAFK	ENST00000406174.2|ENSG00000198517.9|OTTHUMG00000151453.2|OTTHUMT00000322714.2|MAFK-203|MAFK|632|protein_coding|	protein_coding	0.682537	0.201041	2.61063	1.91369e-07
MAGED2	ENST00000375068.5|ENSG00000102316.16|OTTHUMG00000021638.3|OTTHUMT00000056821.2|MAGED2-206|MAGED2|2189|protein_coding|	protein_coding	-1.11156	7.44952e-12	0.412095	0.0390539
MAGI2	ENST00000628980.2|ENSG00000187391.19|OTTHUMG00000130697.18|-|MAGI2-215|MAGI2|6212|protein_coding|	protein_coding	0.105193	0.921476	2.27186	0.026154
MAGOHB	ENST00000625272.1|ENSG00000111196.9|OTTHUMG00000168407.2|-|MAGOHB-211|MAGOHB|319|protein_coding|	protein_coding	-0.431859	0.330989	-1.55584	0.0265509
MAIP1	ENST00000435773.2|ENSG00000162972.10|OTTHUMG00000132771.4|OTTHUMT00000335539.3|MAIP1-203|MAIP1|737|protein_coding|	protein_coding	-0.0892617	0.910094	1.78066	0.00913636
MALAT1	ENST00000616527.4|ENSG00000251562.7|OTTHUMG00000166322.4|OTTHUMT00000473539.1|MALAT1-208|MALAT1|572|lincRNA|	lincRNA	1.5643	0.0348155	-3.05278	0.0385306
MALAT1	ENST00000544868.2|ENSG00000251562.7|OTTHUMG00000166322.4|OTTHUMT00000473537.1|MALAT1-203|MALAT1|480|lincRNA|	lincRNA	0.484285	0.686427	2.43583	0.0376824
MAMDC2	ENST00000377182.4|ENSG00000165072.9|OTTHUMG00000019990.1|OTTHUMT00000052600.1|MAMDC2-201|MAMDC2|3616|protein_coding|	protein_coding	-1.28804	1.26731e-20	-0.373279	0.0299866
MAN1B1	ENST00000474902.5|ENSG00000177239.14|OTTHUMG00000020978.6|OTTHUMT00000055291.3|MAN1B1-203|MAN1B1|2336|processed_transcript|	processed_transcript	-0.298223	0.619587	1.53066	0.0118018
MAN2A2	ENST00000557865.5|ENSG00000196547.14|OTTHUMG00000172385.14|OTTHUMT00000418251.2|MAN2A2-202|MAN2A2|2671|protein_coding|	protein_coding	-0.266627	0.76097	1.97516	0.0224113
MAN2A2	ENST00000560451.5|ENSG00000196547.14|OTTHUMG00000172385.14|OTTHUMT00000418248.2|MAN2A2-221|MAN2A2|5124|nonsense_mediated_decay|	nonsense_mediated_decay	-0.717716	0.342839	2.22163	0.0096652
MAP2K2	ENST00000599021.1|ENSG00000126934.13|OTTHUMG00000134286.6|OTTHUMT00000459404.2|MAP2K2-207|MAP2K2|314|protein_coding|	protein_coding	0.176537	0.838677	-2.90763	0.0164603
MAP2K7	ENST00000468058.1|ENSG00000076984.17|OTTHUMG00000137368.3|OTTHUMT00000267982.1|MAP2K7-205|MAP2K7|1589|retained_intron|	retained_intron	0.222552	0.836042	2.76039	0.00128697
MAPK3	ENST00000395199.7|ENSG00000102882.11|OTTHUMG00000132149.7|OTTHUMT00000268286.1|MAPK3-203|MAPK3|1074|protein_coding|	protein_coding	1.46069	0.00361737	1.74487	0.0113074
MAPK8IP3	ENST00000562042.1|ENSG00000138834.12|OTTHUMG00000128637.5|OTTHUMT00000433178.1|MAPK8IP3-205|MAPK8IP3|330|retained_intron|	retained_intron	-0.0844316	0.873775	1.64792	0.000213111
MAPKAP1	ENST00000427078.5|ENSG00000119487.16|OTTHUMG00000020683.7|OTTHUMT00000054096.5|MAPKAP1-210|MAPKAP1|816|protein_coding|	protein_coding	1.69387	0.0058806	1.79166	0.0390782
MAPKAPK5-AS1	ENST00000609983.1|ENSG00000234608.7|OTTHUMG00000141273.4|OTTHUMT00000472182.1|MAPKAPK5-AS1-207|MAPKAPK5-AS1|662|lincRNA|	lincRNA	-1.07926	0.0494929	-2.86148	0.00327968
MAPRE2	ENST00000588085.1|ENSG00000166974.12|OTTHUMG00000132551.9|OTTHUMT00000442279.1|MAPRE2-207|MAPRE2|476|retained_intron|	retained_intron	0.884426	0.0836305	1.77081	0.00462111
MAPT	ENST00000446361.7|ENSG00000186868.15|OTTHUMG00000168833.6|OTTHUMT00000401263.3|MAPT-209|MAPT|5345|protein_coding|	protein_coding	-3.20517	4.225e-05	1.14893	0.0459772
MARCH6	ENST00000510872.5|ENSG00000145495.15|OTTHUMG00000162027.4|OTTHUMT00000368053.1|MARCH6-209|MARCH6|577|processed_transcript|	processed_transcript	0.964037	0.147515	-3.08385	0.0060454
MARCH6	ENST00000512449.5|ENSG00000145495.15|OTTHUMG00000162027.4|OTTHUMT00000366929.1|MARCH6-211|MARCH6|832|retained_intron|	retained_intron	0.418892	0.501696	1.51728	0.030205
MARCH6	ENST00000507863.1|ENSG00000145495.15|OTTHUMG00000162027.4|OTTHUMT00000368054.1|MARCH6-207|MARCH6|582|processed_transcript|	processed_transcript	0.0398913	0.960503	1.8713	0.00655446
MARS	ENST00000551805.1|ENSG00000166986.14|OTTHUMG00000169996.5|OTTHUMT00000407079.1|MARS-224|MARS|479|retained_intron|	retained_intron	0.46285	0.317122	1.19302	0.0401742
MATN2	ENST00000521689.5|ENSG00000132561.13|OTTHUMG00000164795.3|OTTHUMT00000380327.1|MATN2-211|MATN2|3554|protein_coding|	protein_coding	-0.662957	0.141972	1.12023	0.0292911
MATN4	ENST00000372756.5|ENSG00000124159.15|OTTHUMG00000033043.2|OTTHUMT00000080334.1|MATN4-204|MATN4|2077|protein_coding|	protein_coding	-2.26854	0.00760551	2.05297	0.000249594
MATR3	ENST00000504045.5|ENSG00000015479.18|OTTHUMG00000129229.6|OTTHUMT00000373018.2|MATR3-208|MATR3|1530|protein_coding|	protein_coding	-0.046028	0.899568	1.13265	0.00130481
MAU2	ENST00000585823.7|ENSG00000129933.20|OTTHUMG00000150188.13|OTTHUMT00000459668.5|MAU2-204|MAU2|568|processed_transcript|	processed_transcript	1.12988	0.0290013	1.80132	0.00457363
MBD1	ENST00000585672.5|ENSG00000141644.17|OTTHUMG00000132669.8|OTTHUMT00000448751.2|MBD1-212|MBD1|2532|protein_coding|	protein_coding	1.95246	1.1772e-05	1.39971	0.0418069
MBIP	ENST00000603139.1|ENSG00000151332.18|OTTHUMG00000140222.4|OTTHUMT00000410119.1|MBIP-204|MBIP|702|protein_coding|	protein_coding	-0.970882	0.102272	-2.35789	0.00857075
MBNL1	ENST00000355460.6|ENSG00000152601.17|OTTHUMG00000159163.4|OTTHUMT00000353599.1|MBNL1-205|MBNL1|5941|protein_coding|	protein_coding	0.615921	0.485418	2.86721	0.000905492
MBNL1	ENST00000498502.5|ENSG00000152601.17|OTTHUMG00000159163.4|OTTHUMT00000353605.1|MBNL1-223|MBNL1|5258|protein_coding|	protein_coding	-0.82381	0.0226563	-1.54041	0.00914387
MBOAT7	ENST00000449249.5|ENSG00000125505.16|OTTHUMG00000066516.10|OTTHUMT00000336875.1|MBOAT7-207|MBOAT7|707|protein_coding|	protein_coding	0.837931	0.0482015	1.16344	0.0457094
MBP	ENST00000382582.7|ENSG00000197971.14|OTTHUMG00000132874.8|OTTHUMT00000256359.3|MBP-204|MBP|2281|protein_coding|	protein_coding	-0.88187	0.143838	2.0541	0.00521216
MCC	ENST00000515367.6|ENSG00000171444.17|OTTHUMG00000128804.10|OTTHUMT00000371804.2|MCC-209|MCC|3844|protein_coding|	protein_coding	0.557092	0.366953	1.77125	0.0126263
MCFD2	ENST00000409913.5|ENSG00000180398.11|OTTHUMG00000153100.3|OTTHUMT00000329519.1|MCFD2-207|MCFD2|3975|protein_coding|	protein_coding	-0.683047	0.165882	-2.50855	0.00698742
MCM7	ENST00000491245.6|ENSG00000166508.17|OTTHUMG00000154671.9|OTTHUMT00000336601.2|MCM7-211|MCM7|648|nonsense_mediated_decay|	nonsense_mediated_decay	-1.17147	0.203275	2.76565	0.000625905
MCRIP2	ENST00000491999.5|ENSG00000172366.19|OTTHUMG00000048042.7|OTTHUMT00000109346.4|MCRIP2-203|MCRIP2|1050|nonsense_mediated_decay|	nonsense_mediated_decay	-0.326504	0.587639	1.37588	0.0239678
MCRS1	ENST00000547182.1|ENSG00000187778.13|OTTHUMG00000169620.5|OTTHUMT00000405105.1|MCRS1-204|MCRS1|724|processed_transcript|	processed_transcript	0.270338	0.689321	2.64312	3.11501e-06
MCTP1	ENST00000512425.5|ENSG00000175471.19|OTTHUMG00000162742.8|OTTHUMT00000370283.3|MCTP1-212|MCTP1|1751|protein_coding|	protein_coding	0.741251	0.154472	1.76681	0.0133889
MCU	ENST00000603118.5|ENSG00000156026.14|OTTHUMG00000018443.3|OTTHUMT00000468495.1|MCU-205|MCU|544|processed_transcript|	processed_transcript	0.570226	0.135744	1.17607	0.0127359
MDFIC	ENST00000498196.1|ENSG00000135272.10|OTTHUMG00000023647.9|OTTHUMT00000351028.2|MDFIC-207|MDFIC|584|protein_coding|	protein_coding	0.381538	0.475791	-2.93759	0.00349298
MDH2	ENST00000461665.5|ENSG00000146701.11|OTTHUMG00000023827.6|OTTHUMT00000344188.1|MDH2-206|MDH2|551|retained_intron|	retained_intron	0.973923	0.00628589	1.08995	0.0359083
MDK	ENST00000395569.8|ENSG00000110492.15|OTTHUMG00000150315.6|OTTHUMT00000317544.1|MDK-204|MDK|686|protein_coding|	protein_coding	-0.938093	0.0315413	-1.84051	0.0130666
MDK	ENST00000490240.5|ENSG00000110492.15|OTTHUMG00000150315.6|OTTHUMT00000317548.1|MDK-210|MDK|603|retained_intron|	retained_intron	-0.323341	0.525634	1.13007	0.032102
MED13L	ENST00000552340.1|ENSG00000123066.7|OTTHUMG00000169404.5|OTTHUMT00000404168.1|MED13L-209|MED13L|665|protein_coding|	protein_coding	-1.03628	0.03313	2.47653	1.16728e-07
MED16	ENST00000325464.5|ENSG00000175221.14|OTTHUMG00000181841.9|-|MED16-203|MED16|2922|protein_coding|	protein_coding	2.30673	0.0517446	3.03443	0.0406834
MED24	ENST00000614384.4|ENSG00000008838.19|OTTHUMG00000133329.6|-|MED24-234|MED24|454|protein_coding|	protein_coding	-0.614191	0.221166	-1.48045	0.0485032
MED24	ENST00000581058.5|ENSG00000008838.19|OTTHUMG00000133329.6|OTTHUMT00000446879.1|MED24-228|MED24|524|nonsense_mediated_decay|	nonsense_mediated_decay	-0.0528817	0.946323	2.17165	0.000317515
MED25	ENST00000617849.4|ENSG00000104973.16|OTTHUMG00000183161.3|-|MED25-211|MED25|1548|protein_coding|	protein_coding	0.0480338	0.962451	3.39244	1.20581e-05
MED26	ENST00000611692.4|ENSG00000105085.10|OTTHUMG00000182433.4|OTTHUMT00000461179.4|MED26-207|MED26|1444|protein_coding|	protein_coding	0.258208	0.733716	2.04838	0.0147753
MED29	ENST00000596297.1|ENSG00000063322.13|OTTHUMG00000182969.3|OTTHUMT00000464492.3|MED29-203|MED29|636|protein_coding|	protein_coding	0.299516	0.45634	1.21866	0.00906839
MED29	ENST00000315588.9|ENSG00000063322.13|OTTHUMG00000182969.3|OTTHUMT00000464486.1|MED29-201|MED29|3653|protein_coding|	protein_coding	-0.422655	0.681897	2.66597	0.000980615
MED6	ENST00000556044.5|ENSG00000133997.11|OTTHUMG00000171252.2|OTTHUMT00000412564.1|MED6-209|MED6|572|processed_transcript|	processed_transcript	1.56387	0.0132508	1.82652	0.038619
MED8	ENST00000372455.4|ENSG00000159479.16|OTTHUMG00000007421.6|OTTHUMT00000019491.2|MED8-202|MED8|1186|protein_coding|	protein_coding	1.72247	1.21394e-28	0.429156	0.047893
MEF2C	ENST00000514015.5|ENSG00000081189.15|OTTHUMG00000162634.12|OTTHUMT00000370093.2|MEF2C-221|MEF2C|2772|protein_coding|	protein_coding	0.282538	0.633881	1.58743	0.0356558
MEF2D	ENST00000360595.7|ENSG00000116604.17|OTTHUMG00000033095.8|OTTHUMT00000080654.1|MEF2D-202|MEF2D|3194|protein_coding|	protein_coding	2.85006	1.27035e-08	1.58726	0.0465064
MELTF	ENST00000439320.1|ENSG00000163975.11|OTTHUMG00000155518.2|OTTHUMT00000340460.2|MELTF-203|MELTF|629|protein_coding|	protein_coding	-0.598348	0.402485	1.52624	0.0305065
MEST	ENST00000463263.1|ENSG00000106484.14|OTTHUMG00000156661.18|OTTHUMT00000345205.2|MEST-215|MEST|764|protein_coding|	protein_coding	0.781412	0.122047	-1.9192	0.030213
METTL13	ENST00000362019.7|ENSG00000010165.19|OTTHUMG00000034912.6|OTTHUMT00000084845.1|METTL13-202|METTL13|3022|protein_coding|	protein_coding	0.850638	0.0798465	1.36361	0.0395664
METTL17	ENST00000557550.6|ENSG00000165792.17|OTTHUMG00000029610.7|OTTHUMT00000411390.1|METTL17-224|METTL17|1529|nonsense_mediated_decay|	nonsense_mediated_decay	1.18077	0.00767966	1.45703	0.0181639
METTL21A	ENST00000448823.2|ENSG00000144401.14|OTTHUMG00000132934.4|OTTHUMT00000337053.2|METTL21A-209|METTL21A|869|protein_coding|	protein_coding	0.199609	0.718719	-1.90472	0.0198929
METTL3	ENST00000537163.5|ENSG00000165819.11|OTTHUMG00000168825.5|OTTHUMT00000401231.1|METTL3-206|METTL3|2030|nonsense_mediated_decay|	nonsense_mediated_decay	-0.712944	0.0378873	-1.15469	0.0365118
METTL5	ENST00000308099.7|ENSG00000138382.14|OTTHUMG00000154117.3|OTTHUMT00000396839.1|METTL5-202|METTL5|629|protein_coding|	protein_coding	1.09675	0.106997	2.30277	0.00769977
METTL8	ENST00000463392.5|ENSG00000123600.19|OTTHUMG00000132261.6|OTTHUMT00000323313.2|METTL8-212|METTL8|697|processed_transcript|	processed_transcript	2.03605	0.000209363	-2.54803	0.0292744
METTL8	ENST00000477130.1|ENSG00000123600.19|OTTHUMG00000132261.6|OTTHUMT00000323311.2|METTL8-215|METTL8|445|processed_transcript|	processed_transcript	0.425925	0.456377	-1.95857	0.0203388
MFAP3L	ENST00000512698.1|ENSG00000198948.11|OTTHUMG00000160942.9|OTTHUMT00000363106.3|MFAP3L-210|MFAP3L|564|protein_coding|	protein_coding	-0.0473328	0.940769	1.95284	5.16771e-05
MFSD1	ENST00000622669.4|ENSG00000118855.18|OTTHUMG00000158835.8|-|MFSD1-219|MFSD1|2361|protein_coding|	protein_coding	-0.123725	0.910871	2.87141	0.00128697
MFSD10	ENST00000507555.1|ENSG00000109736.14|OTTHUMG00000122081.7|OTTHUMT00000357933.1|MFSD10-205|MFSD10|1573|protein_coding|	protein_coding	0.787107	0.352709	2.08487	0.0203553
MFSD12	ENST00000589063.5|ENSG00000161091.12|OTTHUMG00000180766.5|OTTHUMT00000453017.1|MFSD12-209|MFSD12|590|protein_coding|	protein_coding	0.391204	0.282635	1.10368	0.00919713
MGAT4B	ENST00000518702.5|ENSG00000161013.16|OTTHUMG00000130912.6|OTTHUMT00000374476.1|MGAT4B-204|MGAT4B|542|retained_intron|	retained_intron	-0.167852	0.583965	-1.79051	0.000126025
MGAT4B	ENST00000518867.5|ENSG00000161013.16|OTTHUMG00000130912.6|OTTHUMT00000375230.2|MGAT4B-206|MGAT4B|732|protein_coding|	protein_coding	0.0809916	0.818673	1.03927	0.00457363
MGAT4B	ENST00000523329.1|ENSG00000161013.16|OTTHUMG00000130912.6|OTTHUMT00000374475.1|MGAT4B-222|MGAT4B|543|nonsense_mediated_decay|	nonsense_mediated_decay	0.435262	0.54838	1.88472	0.00812218
MGAT5B	ENST00000428789.6|ENSG00000167889.12|OTTHUMG00000177278.4|OTTHUMT00000436088.1|MGAT5B-203|MGAT5B|4053|protein_coding|	protein_coding	0.249366	0.583893	1.13644	0.0205043
MGLL	ENST00000465597.5|ENSG00000074416.13|OTTHUMG00000159641.4|OTTHUMT00000356723.1|MGLL-206|MGLL|446|processed_transcript|	processed_transcript	1.36176	0.00988637	2.50443	4.02733e-05
MGRN1	ENST00000399577.9|ENSG00000102858.12|OTTHUMG00000176436.11|OTTHUMT00000432060.2|MGRN1-202|MGRN1|6425|protein_coding|	protein_coding	-0.236343	0.760049	-2.79528	0.0407
MGST1	ENST00000010404.6|ENSG00000008394.12|OTTHUMG00000168816.4|-|MGST1-201|MGST1|901|protein_coding|	protein_coding	-0.555404	0.635446	2.39208	0.0158844
MGST3	ENST00000477450.1|ENSG00000143198.12|OTTHUMG00000034627.6|OTTHUMT00000083881.1|MGST3-209|MGST3|364|processed_transcript|	processed_transcript	-1.1895	0.0121041	1.19012	0.00755342
MIA	ENST00000597784.5|ENSG00000261857.6|OTTHUMG00000182693.3|OTTHUMT00000463161.1|MIA-206|MIA|455|protein_coding|	protein_coding	-0.273345	0.68361	1.7477	0.0191471
MIB2	ENST00000504599.5|ENSG00000197530.12|OTTHUMG00000074647.10|OTTHUMT00000365931.1|MIB2-217|MIB2|3311|protein_coding|	protein_coding	-0.423156	0.444008	1.91648	0.00502619
MIB2	ENST00000487053.5|ENSG00000197530.12|OTTHUMG00000074647.10|OTTHUMT00000158408.2|MIB2-213|MIB2|3252|nonsense_mediated_decay|	nonsense_mediated_decay	0.0041752	0.996561	2.5241	0.00375547
MICAL2	ENST00000526475.1|ENSG00000133816.13|OTTHUMG00000165744.7|OTTHUMT00000386156.1|MICAL2-213|MICAL2|538|processed_transcript|	processed_transcript	0.206748	0.743416	-2.07444	0.018107
MICAL3	ENST00000252134.11|ENSG00000243156.7|OTTHUMG00000150067.6|OTTHUMT00000447352.1|MICAL3-201|MICAL3|917|retained_intron|	retained_intron	-1.10131	5.97687e-06	0.582011	0.0202678
MICALL1	ENST00000445494.5|ENSG00000100139.13|OTTHUMG00000150670.6|OTTHUMT00000319546.2|MICALL1-204|MICALL1|808|protein_coding|	protein_coding	4.74525	9.75754e-10	2.55588	0.0317503
MICALL1	ENST00000454685.5|ENSG00000100139.13|OTTHUMG00000150670.6|OTTHUMT00000319550.2|MICALL1-205|MICALL1|1108|protein_coding|	protein_coding	2.70562	1.31519e-12	1.57288	0.00441497
MICALL1	ENST00000424008.1|ENSG00000100139.13|OTTHUMG00000150670.6|OTTHUMT00000319549.1|MICALL1-203|MICALL1|918|protein_coding|	protein_coding	1.43077	4.25567e-33	0.325356	0.0371221
MILR1	ENST00000615220.4|ENSG00000271605.5|OTTHUMG00000185198.4|OTTHUMT00000477477.1|MILR1-203|MILR1|1196|protein_coding|	protein_coding	-0.708479	0.228944	-1.85994	0.0409994
MINDY2	ENST00000316848.9|ENSG00000128923.10|OTTHUMG00000171983.2|OTTHUMT00000416228.1|MINDY2-201|MINDY2|4866|nonsense_mediated_decay|	nonsense_mediated_decay	0.0568677	0.926297	1.19969	0.0334521
MIR663AHG	ENST00000608487.5|ENSG00000227195.10|OTTHUMG00000032149.4|OTTHUMT00000473079.1|MIR663AHG-228|MIR663AHG|486|lincRNA|	lincRNA	0.809509	0.0410825	1.30723	0.00870647
MIR663AHG	ENST00000601079.5|ENSG00000227195.10|OTTHUMG00000032149.4|OTTHUMT00000461917.1|MIR663AHG-223|MIR663AHG|613|lincRNA|	lincRNA	0.791961	0.0491033	1.31112	0.00991397
MITF	ENST00000394351.7|ENSG00000187098.14|OTTHUMG00000149921.13|OTTHUMT00000313944.1|MITF-206|MITF|1956|protein_coding|	protein_coding	-0.0318602	0.971439	1.76438	0.0211739
MKL1	ENST00000463769.6|ENSG00000196588.14|OTTHUMG00000151146.7|OTTHUMT00000321525.2|MKL1-207|MKL1|531|processed_transcript|	processed_transcript	1.33768	0.00912615	2.06763	0.000721813
MKNK1	ENST00000528077.5|ENSG00000079277.19|OTTHUMG00000007983.6|OTTHUMT00000387145.2|MKNK1-220|MKNK1|1557|nonsense_mediated_decay|	nonsense_mediated_decay	1.16914	0.0609968	2.48329	0.00160426
MKNK2	ENST00000586828.5|ENSG00000099875.14|OTTHUMG00000180020.6|OTTHUMT00000449315.1|MKNK2-205|MKNK2|1503|nonsense_mediated_decay|	nonsense_mediated_decay	1.15535	0.208591	3.61803	9.06484e-05
MKRN2	ENST00000411987.5|ENSG00000075975.15|OTTHUMG00000155371.2|OTTHUMT00000339680.1|MKRN2-202|MKRN2|1436|protein_coding|	protein_coding	1.77999	0.00224434	1.76958	0.028344
MLF2	ENST00000542154.5|ENSG00000089693.10|OTTHUMG00000168717.5|OTTHUMT00000402830.1|MLF2-210|MLF2|838|protein_coding|	protein_coding	-0.205039	0.793343	2.47622	0.00458215
MLF2	ENST00000541305.1|ENSG00000089693.10|OTTHUMG00000168717.5|OTTHUMT00000402829.1|MLF2-208|MLF2|564|retained_intron|	retained_intron	-0.125627	0.912355	2.18497	0.0188163
MLKL	ENST00000308807.11|ENSG00000168404.12|OTTHUMG00000177356.6|OTTHUMT00000436403.3|MLKL-202|MLKL|2523|protein_coding|	protein_coding	1.4868	3.79359e-32	-0.367624	0.0494852
MLLT1	ENST00000587473.1|ENSG00000130382.8|OTTHUMG00000180757.2|OTTHUMT00000452908.1|MLLT1-203|MLLT1|556|processed_transcript|	processed_transcript	-0.101517	0.893271	1.95835	0.015166
MLPH	ENST00000415753.5|ENSG00000115648.13|OTTHUMG00000133298.3|OTTHUMT00000328871.1|MLPH-205|MLPH|841|protein_coding|	protein_coding	-0.173738	0.791622	1.39628	0.0240915
MLPH	ENST00000434770.1|ENSG00000115648.13|OTTHUMG00000133298.3|OTTHUMT00000328874.1|MLPH-209|MLPH|726|protein_coding|	protein_coding	-0.374204	0.511591	-1.68684	0.0481952
MLST8	ENST00000561651.5|ENSG00000167965.17|OTTHUMG00000128827.5|OTTHUMT00000435079.1|MLST8-204|MLST8|703|processed_transcript|	processed_transcript	0.357945	0.551347	-1.92141	0.0292911
MMP2	ENST00000564864.5|ENSG00000087245.12|OTTHUMG00000133202.5|OTTHUMT00000433259.2|MMP2-204|MMP2|736|protein_coding|	protein_coding	-0.258699	0.739427	-4.06393	0.027063
MMP23B	ENST00000479814.5|ENSG00000189409.13|OTTHUMG00000074713.6|OTTHUMT00000158494.3|MMP23B-205|MMP23B|903|protein_coding|	protein_coding	-0.779672	0.14417	1.30304	0.0169906
MMP28	ENST00000615317.4|ENSG00000271447.5|OTTHUMG00000188387.2|OTTHUMT00000477062.1|MMP28-205|MMP28|436|protein_coding|	protein_coding	-1.4769	3.23926e-05	-1.20209	0.0187419
MMRN2	ENST00000609457.5|ENSG00000173269.13|OTTHUMG00000018663.4|OTTHUMT00000471957.2|MMRN2-206|MMRN2|890|protein_coding|	protein_coding	0.157344	0.834055	1.43378	0.0499088
MMS19	ENST00000444411.5|ENSG00000155229.20|OTTHUMG00000018857.5|OTTHUMT00000049718.2|MMS19-212|MMS19|640|protein_coding|	protein_coding	-0.214856	0.698805	-2.55696	0.0470196
MOB3A	ENST00000592280.1|ENSG00000172081.13|OTTHUMG00000180353.4|OTTHUMT00000450895.1|MOB3A-209|MOB3A|1071|protein_coding|	protein_coding	0.397679	0.540798	1.80466	0.0233932
MOV10	ENST00000369644.5|ENSG00000155363.18|OTTHUMG00000011906.1|OTTHUMT00000032908.1|MOV10-202|MOV10|4100|protein_coding|	protein_coding	1.07335	0.113596	2.22914	0.0147634
MPDU1	ENST00000574558.1|ENSG00000129255.15|OTTHUMG00000108147.10|OTTHUMT00000441096.2|MPDU1-212|MPDU1|900|nonsense_mediated_decay|	nonsense_mediated_decay	0.768592	0.0010843	-2.35596	2.94721e-06
MPDU1	ENST00000570458.5|ENSG00000129255.15|OTTHUMG00000108147.10|OTTHUMT00000441094.2|MPDU1-205|MPDU1|591|nonsense_mediated_decay|	nonsense_mediated_decay	1.67111	0.00385693	2.23434	0.00691082
MPHOSPH6	ENST00000563504.5|ENSG00000135698.9|OTTHUMG00000137632.2|OTTHUMT00000432569.1|MPHOSPH6-203|MPHOSPH6|617|protein_coding|	protein_coding	1.76419	8.11348e-17	-0.893114	0.0228048
MPND	ENST00000594162.1|ENSG00000008382.15|OTTHUMG00000181914.2|OTTHUMT00000459328.1|MPND-203|MPND|407|protein_coding|	protein_coding	-0.101189	0.848176	1.52235	0.000633407
MPP1	ENST00000393531.5|ENSG00000130830.14|OTTHUMG00000024244.9|OTTHUMT00000316137.1|MPP1-204|MPP1|1389|protein_coding|	protein_coding	1.29215	0.0875779	3.54291	1.05009e-06
MPZ	ENST00000463290.5|ENSG00000158887.15|OTTHUMG00000034341.4|OTTHUMT00000082988.3|MPZ-201|MPZ|1693|nonsense_mediated_decay|	nonsense_mediated_decay	0.689935	0.233954	1.94999	0.0120679
MRFAP1	ENST00000507420.1|ENSG00000179010.14|OTTHUMG00000125504.3|OTTHUMT00000359629.1|MRFAP1-203|MRFAP1|563|protein_coding|	protein_coding	0.136575	0.931882	3.04177	0.0154936
MRFAP1	ENST00000617365.4|ENSG00000179010.14|OTTHUMG00000125504.3|-|MRFAP1-205|MRFAP1|2112|protein_coding|	protein_coding	-0.0138204	0.971415	1.25887	0.000100927
MROH7-TTC4	ENST00000425300.6|ENSG00000271723.5|OTTHUMG00000185328.1|OTTHUMT00000470196.1|MROH7-TTC4-202|MROH7-TTC4|6090|nonsense_mediated_decay|	nonsense_mediated_decay	-1.14656	0.079941	1.67047	0.0112478
MRPL13	ENST00000522717.1|ENSG00000172172.7|OTTHUMG00000165039.2|OTTHUMT00000381522.1|MRPL13-206|MRPL13|480|retained_intron|	retained_intron	0.846326	0.225656	1.79836	0.0255562
MRPL17	ENST00000532676.1|ENSG00000158042.8|OTTHUMG00000165505.2|OTTHUMT00000384545.1|MRPL17-204|MRPL17|303|processed_transcript|	processed_transcript	-1.18466	0.0279411	-3.58816	8.27338e-06
MRPL17	ENST00000532203.1|ENSG00000158042.8|OTTHUMG00000165505.2|OTTHUMT00000384547.2|MRPL17-203|MRPL17|448|protein_coding|	protein_coding	1.04473	9.48129e-05	1.07292	0.00430686
MRPL28	ENST00000447696.5|ENSG00000086504.15|OTTHUMG00000047994.6|OTTHUMT00000139288.2|MRPL28-205|MRPL28|722|protein_coding|	protein_coding	1.106	0.0816092	2.51869	0.000379328
MRPL28	ENST00000389675.6|ENSG00000086504.15|OTTHUMG00000047994.6|OTTHUMT00000139287.1|MRPL28-202|MRPL28|865|protein_coding|	protein_coding	0.622213	0.153486	-2.69253	0.0167886
MRPL28	ENST00000441883.5|ENSG00000086504.15|OTTHUMG00000047994.6|OTTHUMT00000313683.2|MRPL28-204|MRPL28|800|protein_coding|	protein_coding	-0.838276	0.183818	-2.54838	0.00710948
MRPL34	ENST00000594999.1|ENSG00000130312.6|OTTHUMG00000182764.1|OTTHUMT00000463515.1|MRPL34-202|MRPL34|555|protein_coding|	protein_coding	-0.0428195	0.952224	2.26065	0.00223511
MRPL52	ENST00000397505.2|ENSG00000172590.18|OTTHUMG00000028703.11|OTTHUMT00000071659.3|MRPL52-204|MRPL52|333|protein_coding|	protein_coding	1.0705	2.64587e-12	0.505685	0.0276183
MRPL55	ENST00000492170.1|ENSG00000162910.18|OTTHUMG00000037965.8|OTTHUMT00000092813.1|MRPL55-231|MRPL55|241|retained_intron|	retained_intron	0.310864	0.605338	1.78543	0.00831042
MRPS2	ENST00000371785.5|ENSG00000122140.10|OTTHUMG00000020910.2|OTTHUMT00000054998.1|MRPS2-202|MRPS2|1640|protein_coding|	protein_coding	0.241648	0.712913	1.80237	0.0123468
MRRF	ENST00000470366.5|ENSG00000148187.17|OTTHUMG00000020600.6|OTTHUMT00000053921.3|MRRF-211|MRRF|1186|nonsense_mediated_decay|	nonsense_mediated_decay	0.435347	0.462136	-1.87142	0.0291877
MSLN	ENST00000563941.5|ENSG00000102854.15|OTTHUMG00000047992.5|OTTHUMT00000420612.1|MSLN-205|MSLN|2109|protein_coding|	protein_coding	-0.744779	0.172815	1.61368	0.0163866
MSRA	ENST00000441698.6|ENSG00000175806.14|OTTHUMG00000090517.7|OTTHUMT00000375425.1|MSRA-203|MSRA|788|protein_coding|	protein_coding	1.35026	0.0391758	2.0701	0.0175164
MT1G	ENST00000379811.3|ENSG00000125144.13|OTTHUMG00000133275.2|OTTHUMT00000257054.1|MT1G-201|MT1G|405|protein_coding|	protein_coding	-0.811216	0.012936	-1.1097	0.0305332
MT1X	ENST00000564974.1|ENSG00000187193.8|OTTHUMG00000133280.6|OTTHUMT00000433819.2|MT1X-203|MT1X|549|nonsense_mediated_decay|	nonsense_mediated_decay	-1.29585	3.47481e-06	0.801688	0.00217116
MT4	ENST00000219162.3|ENSG00000102891.3|OTTHUMG00000176863.1|OTTHUMT00000434118.1|MT4-201|MT4|294|protein_coding|	protein_coding	-3.2898	4.45059e-05	-1.77896	0.0310859
MTA1	ENST00000331320.11|ENSG00000182979.17|OTTHUMG00000150362.36|OTTHUMT00000317849.34|MTA1-201|MTA1|2876|protein_coding|	protein_coding	0.0811157	0.909742	1.6916	0.041523
MTF2	ENST00000540243.5|ENSG00000143033.17|OTTHUMG00000010161.7|-|MTF2-213|MTF2|3845|protein_coding|	protein_coding	-0.382496	0.7025	2.01959	0.0183997
MTMR1	ENST00000542156.5|ENSG00000063601.16|OTTHUMG00000024159.6|-|MTMR1-214|MTMR1|1227|protein_coding|	protein_coding	1.0021	0.00100317	-1.73384	0.0292925
MTMR11	ENST00000482343.5|ENSG00000014914.20|OTTHUMG00000012207.7|OTTHUMT00000033752.4|MTMR11-206|MTMR11|2736|retained_intron|	retained_intron	-1.82384	0.00404355	-2.76975	0.00678189
MTMR11	ENST00000482025.5|ENSG00000014914.20|OTTHUMG00000012207.7|OTTHUMT00000034138.3|MTMR11-205|MTMR11|2834|retained_intron|	retained_intron	-1.50898	0.000636393	-2.20954	0.0023838
MTMR3	ENST00000491251.1|ENSG00000100330.15|OTTHUMG00000151278.3|OTTHUMT00000322075.1|MTMR3-210|MTMR3|569|retained_intron|	retained_intron	0.126089	0.849768	1.54099	0.0242334
MTR	ENST00000535889.5|ENSG00000116984.12|OTTHUMG00000040060.3|-|MTR-205|MTR|10405|protein_coding|	protein_coding	-0.10729	0.889697	1.68549	0.022221
MTSS1	ENST00000431961.6|ENSG00000170873.18|OTTHUMG00000048189.5|OTTHUMT00000109624.2|MTSS1-203|MTSS1|1711|protein_coding|	protein_coding	1.61949	0.0248267	1.98352	0.0467319
MUC12	ENST00000536621.5|ENSG00000205277.9|OTTHUMG00000157042.1|-|MUC12-206|MUC12|16321|protein_coding|	protein_coding	-0.177372	0.682457	1.01457	0.0182126
MUC15	ENST00000436318.6|ENSG00000169550.12|OTTHUMG00000166112.1|-|MUC15-202|MUC15|3118|protein_coding|	protein_coding	-0.288474	0.456488	-1.24795	0.0363221
MUC16	ENST00000397910.8|ENSG00000181143.15|OTTHUMG00000169191.3|OTTHUMT00000402806.1|MUC16-201|MUC16|43816|protein_coding|	protein_coding	-2.09124	7.59721e-05	1.08176	0.0212603
MUM1	ENST00000586067.1|ENSG00000160953.15|OTTHUMG00000180055.7|OTTHUMT00000449514.1|MUM1-203|MUM1|500|processed_transcript|	processed_transcript	-0.48331	0.175145	-2.51632	0.000156288
MVK	ENST00000639206.1|ENSG00000110921.13|OTTHUMG00000169256.5|-|MVK-217|MVK|367|protein_coding|	protein_coding	0.405167	0.235187	-2.58028	0.0024678
MXD1	ENST00000435990.5|ENSG00000059728.10|OTTHUMG00000129646.4|OTTHUMT00000327374.2|MXD1-204|MXD1|860|protein_coding|	protein_coding	3.98934	1.25653e-25	1.455	0.00292816
MYADM	ENST00000439000.5|ENSG00000179820.15|OTTHUMG00000060775.5|OTTHUMT00000134428.3|MYADM-208|MYADM|841|protein_coding|	protein_coding	-0.123452	0.933739	5.75555	6.72402e-09
MYBBP1A	ENST00000381556.6|ENSG00000132382.14|OTTHUMG00000090747.3|-|MYBBP1A-202|MYBBP1A|4104|protein_coding|	protein_coding	1.31714	4.24218e-11	0.703905	0.0187183
MYD88	ENST00000495303.5|ENSG00000172936.12|OTTHUMG00000131083.4|OTTHUMT00000342700.1|MYD88-211|MYD88|976|protein_coding|	protein_coding	2.73521	1.99199e-06	2.36489	0.00480968
MYH10	ENST00000476737.1|ENSG00000133026.12|OTTHUMG00000108195.4|OTTHUMT00000258898.1|MYH10-209|MYH10|592|retained_intron|	retained_intron	-0.229729	0.502522	1.21221	0.000506525
MYH11	ENST00000300036.5|ENSG00000133392.17|OTTHUMG00000129935.4|OTTHUMT00000252192.3|MYH11-201|MYH11|6029|protein_coding|	protein_coding	-0.309738	0.808138	2.6305	0.02834
MYH11	ENST00000576790.6|ENSG00000133392.17|OTTHUMG00000129935.4|OTTHUMT00000436651.2|MYH11-211|MYH11|6272|protein_coding|	protein_coding	-1.37235	1.29557e-05	0.88405	0.0259972
MYH11	ENST00000571275.1|ENSG00000133392.17|OTTHUMG00000129935.4|OTTHUMT00000436653.1|MYH11-205|MYH11|4087|retained_intron|	retained_intron	-0.723344	0.205942	1.44637	0.0117556
MYH14	ENST00000596571.5|ENSG00000105357.15|OTTHUMG00000183034.3|OTTHUMT00000464710.2|MYH14-206|MYH14|5988|protein_coding|	protein_coding	-0.0623073	0.914753	2.30966	0.000145765
MYH14	ENST00000598205.5|ENSG00000105357.15|OTTHUMG00000183034.3|OTTHUMT00000464705.2|MYH14-208|MYH14|6137|protein_coding|	protein_coding	-2.79449	1.81215e-08	1.21914	0.00229941
MYH9	ENST00000475726.5|ENSG00000100345.20|OTTHUMG00000030429.8|OTTHUMT00000259118.1|MYH9-208|MYH9|768|processed_transcript|	processed_transcript	-0.257848	0.612789	1.71199	0.000741346
MYH9	ENST00000486218.1|ENSG00000100345.20|OTTHUMG00000030429.8|OTTHUMT00000259119.1|MYH9-210|MYH9|788|retained_intron|	retained_intron	0.23504	0.758654	1.9824	0.0231087
MYLK	ENST00000508240.1|ENSG00000065534.18|OTTHUMG00000141304.13|OTTHUMT00000358551.8|MYLK-212|MYLK|820|protein_coding|	protein_coding	-0.170658	0.593717	1.08089	0.00133714
MYLK	ENST00000360304.7|ENSG00000065534.18|OTTHUMG00000141304.13|-|MYLK-204|MYLK|7738|protein_coding|	protein_coding	-0.558011	0.539344	1.84195	0.0431944
MYLK	ENST00000514895.5|ENSG00000065534.18|OTTHUMG00000141304.13|OTTHUMT00000358608.1|MYLK-218|MYLK|220|processed_transcript|	processed_transcript	-0.338793	0.428609	1.37373	0.000689774
MYO10	ENST00000515803.5|ENSG00000145555.14|OTTHUMG00000161822.4|OTTHUMT00000366172.2|MYO10-212|MYO10|4839|protein_coding|	protein_coding	0.634644	0.294801	2.17699	0.000927344
MYO1C	ENST00000574341.1|ENSG00000197879.14|OTTHUMG00000090323.14|OTTHUMT00000438925.1|MYO1C-215|MYO1C|541|retained_intron|	retained_intron	-0.0735687	0.852595	1.12141	0.00460693
MYO1E	ENST00000560642.1|ENSG00000157483.8|OTTHUMG00000171944.3|OTTHUMT00000416029.1|MYO1E-209|MYO1E|559|retained_intron|	retained_intron	0.829314	0.109424	1.87892	0.00102215
MYO9A	ENST00000568481.1|ENSG00000066933.15|OTTHUMG00000133440.6|OTTHUMT00000420906.2|MYO9A-219|MYO9A|582|protein_coding|	protein_coding	-0.61412	0.189107	1.30617	0.00340414
MZT2A	ENST00000410036.2|ENSG00000173272.15|OTTHUMG00000153606.3|OTTHUMT00000331813.1|MZT2A-202|MZT2A|382|processed_transcript|	processed_transcript	-0.0347966	0.925115	-1.22524	0.0157675
MZT2A	ENST00000309451.6|ENSG00000173272.15|OTTHUMG00000153606.3|OTTHUMT00000331811.2|MZT2A-201|MZT2A|624|protein_coding|	protein_coding	0.761455	0.0127786	1.04434	0.0136974
NAA20	ENST00000334982.8|ENSG00000173418.11|OTTHUMG00000031998.4|OTTHUMT00000078217.2|NAA20-202|NAA20|1260|protein_coding|	protein_coding	0.822871	0.13598	1.44383	0.0485114
NAA38	ENST00000575208.2|ENSG00000183011.13|OTTHUMG00000178023.3|OTTHUMT00000440257.2|NAA38-204|NAA38|529|protein_coding|	protein_coding	0.197541	0.701821	1.29753	0.0217344
NAA40	ENST00000534965.5|ENSG00000110583.12|OTTHUMG00000167784.3|OTTHUMT00000396265.1|NAA40-203|NAA40|958|nonsense_mediated_decay|	nonsense_mediated_decay	0.0988564	0.883081	1.8563	0.00602279
NAB1	ENST00000434473.1|ENSG00000138386.16|OTTHUMG00000132689.4|OTTHUMT00000335612.1|NAB1-208|NAB1|1661|protein_coding|	protein_coding	-0.438147	0.154702	-1.46712	0.00234006
NACC1	ENST00000585663.1|ENSG00000160877.5|OTTHUMG00000180748.3|OTTHUMT00000452880.1|NACC1-202|NACC1|615|protein_coding|	protein_coding	1.10579	0.000335109	1.18278	0.00644931
NADK	ENST00000497747.5|ENSG00000008130.15|OTTHUMG00000000942.6|OTTHUMT00000002776.1|NADK-216|NADK|467|retained_intron|	retained_intron	0.809945	0.0638697	1.18601	0.0421673
NAGK	ENST00000531934.5|ENSG00000124357.12|OTTHUMG00000153239.25|OTTHUMT00000382815.3|NAGK-227|NAGK|584|protein_coding|	protein_coding	0.578021	0.104085	-1.44675	0.0362893
NAGLU	ENST00000591587.1|ENSG00000108784.9|OTTHUMG00000180240.2|OTTHUMT00000450387.1|NAGLU-204|NAGLU|1493|protein_coding|	protein_coding	0.514088	0.273244	1.93526	0.000147075
NAPSB	ENST00000527780.5|ENSG00000131401.11|OTTHUMG00000166192.3|OTTHUMT00000435869.1|NAPSB-202|NAPSB|1343|processed_transcript|	processed_transcript	2.1802	0.00280229	2.39995	0.0144304
NARF	ENST00000578820.1|ENSG00000141562.17|OTTHUMG00000178844.4|OTTHUMT00000443593.1|NARF-211|NARF|625|retained_intron|	retained_intron	0.612605	0.264311	1.59179	0.0161866
NAT6	ENST00000354862.4|ENSG00000243477.5|OTTHUMG00000156939.2|OTTHUMT00000346683.2|NAT6-201|NAT6|1330|protein_coding|	protein_coding	1.13272	9.61212e-05	1.06342	0.011541
NAV3	ENST00000550788.1|ENSG00000067798.14|OTTHUMG00000170001.3|OTTHUMT00000406819.2|NAV3-211|NAV3|2398|protein_coding|	protein_coding	3.27134	4.54149e-22	1.37993	0.00944049
NBDY	ENST00000451583.1|ENSG00000204272.12|OTTHUMG00000021676.3|OTTHUMT00000056905.2|NBDY-203|NBDY|305|nonsense_mediated_decay|	nonsense_mediated_decay	-0.536445	0.0159515	-1.27904	0.000729004
NBEAL2	ENST00000475689.1|ENSG00000160796.16|OTTHUMG00000156497.5|OTTHUMT00000344442.1|NBEAL2-208|NBEAL2|677|retained_intron|	retained_intron	1.3678	0.00583203	2.12839	0.000390148
NBL1	ENST00000427894.5|ENSG00000158747.13|OTTHUMG00000002700.7|OTTHUMT00000313744.3|NBL1-204|NBL1|573|protein_coding|	protein_coding	-0.31674	0.738296	2.70694	0.000658005
NBL1	ENST00000618761.4|ENSG00000158747.13|OTTHUMG00000002700.7|-|NBL1-211|NBL1|2051|protein_coding|	protein_coding	-0.521073	0.34812	-2.1089	0.00665897
NBL1	ENST00000615215.4|ENSG00000158747.13|OTTHUMG00000002700.7|-|NBL1-210|NBL1|2160|protein_coding|	protein_coding	-0.856997	0.227017	2.04043	0.00234684
NBPF15	ENST00000581897.6|ENSG00000266338.6|OTTHUMG00000013634.13|-|NBPF15-206|NBPF15|4272|protein_coding|	protein_coding	-1.3935	0.13084	-4.15874	0.023383
NCAPH2	ENST00000522304.1|ENSG00000025770.18|OTTHUMG00000150205.6|OTTHUMT00000377499.1|NCAPH2-209|NCAPH2|521|protein_coding|	protein_coding	-0.799546	0.260896	3.30221	4.09891e-08
NCK2	ENST00000393348.6|ENSG00000071051.13|OTTHUMG00000153116.3|OTTHUMT00000329637.2|NCK2-202|NCK2|790|protein_coding|	protein_coding	0.661247	0.157666	1.45088	0.0130415
NCK2	ENST00000522586.5|ENSG00000071051.13|OTTHUMG00000153116.3|OTTHUMT00000376091.1|NCK2-206|NCK2|490|protein_coding|	protein_coding	0.157315	0.707126	1.21862	0.00678188
NCKIPSD	ENST00000415281.1|ENSG00000213672.7|OTTHUMG00000133542.4|OTTHUMT00000344848.2|NCKIPSD-203|NCKIPSD|803|protein_coding|	protein_coding	0.118936	0.851197	2.01223	0.00346458
NCKIPSD	ENST00000470006.1|ENSG00000213672.7|OTTHUMG00000133542.4|OTTHUMT00000344820.1|NCKIPSD-209|NCKIPSD|814|retained_intron|	retained_intron	0.00530884	0.993303	1.15224	0.043177
NCSTN	ENST00000435149.1|ENSG00000162736.15|OTTHUMG00000033110.3|OTTHUMT00000080632.2|NCSTN-206|NCSTN|824|protein_coding|	protein_coding	-0.407254	0.592923	2.48382	4.00736e-05
NDRG1	ENST00000517331.5|ENSG00000104419.14|OTTHUMG00000164441.3|OTTHUMT00000378811.1|NDRG1-203|NDRG1|584|processed_transcript|	processed_transcript	1.06194	0.053356	2.12042	0.00142256
NDRG1	ENST00000414097.6|ENSG00000104419.14|OTTHUMG00000164441.3|OTTHUMT00000378805.1|NDRG1-202|NDRG1|3755|protein_coding|	protein_coding	0.325018	0.408223	1.11067	0.0096547
NDRG2	ENST00000557676.5|ENSG00000165795.23|OTTHUMG00000029619.9|OTTHUMT00000411727.2|NDRG2-276|NDRG2|633|protein_coding|	protein_coding	0.265985	0.546302	1.39517	0.00355139
NDRG2	ENST00000556974.5|ENSG00000165795.23|OTTHUMG00000029619.9|OTTHUMT00000411733.2|NDRG2-260|NDRG2|1012|protein_coding|	protein_coding	-0.944222	0.0717671	-1.60603	0.0469401
NDRG2	ENST00000557198.5|ENSG00000165795.23|OTTHUMG00000029619.9|OTTHUMT00000411833.1|NDRG2-266|NDRG2|583|retained_intron|	retained_intron	-2.10021	0.00361809	1.61108	0.0423329
NDUFA3	ENST00000391762.5|ENSG00000170906.15|OTTHUMG00000064972.14|OTTHUMT00000140195.2|NDUFA3-202|NDUFA3|435|protein_coding|	protein_coding	0.375634	0.152641	-1.3918	0.00177885
NDUFA5	ENST00000378795.8|ENSG00000128609.14|OTTHUMG00000157348.2|OTTHUMT00000348536.1|NDUFA5-202|NDUFA5|1360|protein_coding|	protein_coding	0.686361	0.0360026	1.04122	0.0206067
NDUFA6	ENST00000470753.1|ENSG00000184983.9|OTTHUMG00000151287.4|OTTHUMT00000322090.2|NDUFA6-201|NDUFA6|475|protein_coding|	protein_coding	0.758977	0.0471789	-1.5639	0.0450123
NDUFAF3	ENST00000496152.1|ENSG00000178057.14|OTTHUMG00000156773.2|OTTHUMT00000345687.1|NDUFAF3-206|NDUFAF3|826|retained_intron|	retained_intron	0.420972	0.599271	1.92843	0.0171246
NDUFAF5	ENST00000475968.5|ENSG00000101247.17|OTTHUMG00000031909.7|OTTHUMT00000129749.1|NDUFAF5-206|NDUFAF5|933|processed_transcript|	processed_transcript	-1.16396	0.0478675	-3.42508	0.000190162
NDUFAF7	ENST00000441905.1|ENSG00000003509.15|OTTHUMG00000128468.6|OTTHUMT00000325565.1|NDUFAF7-208|NDUFAF7|661|nonsense_mediated_decay|	nonsense_mediated_decay	0.114974	0.505443	-1.45717	1.32852e-06
NDUFAF7	ENST00000336237.10|ENSG00000003509.15|OTTHUMG00000128468.6|OTTHUMT00000325558.1|NDUFAF7-202|NDUFAF7|1869|protein_coding|	protein_coding	0.837663	0.103742	1.46843	0.0207693
NDUFS7	ENST00000539480.5|ENSG00000115286.19|OTTHUMG00000168077.13|OTTHUMT00000397989.2|NDUFS7-210|NDUFS7|1743|protein_coding|	protein_coding	-1.2569	0.0126935	1.03386	0.0451456
NDUFS8	ENST00000528492.1|ENSG00000110717.12|OTTHUMG00000167331.3|OTTHUMT00000394208.1|NDUFS8-210|NDUFS8|353|protein_coding|	protein_coding	0.0553855	0.860843	-1.75609	0.000102596
NECTIN1	ENST00000340882.2|ENSG00000110400.10|OTTHUMG00000166177.3|OTTHUMT00000388233.2|NECTIN1-202|NECTIN1|1059|protein_coding|	protein_coding	1.15193	9.11982e-06	0.813277	0.0431217
NECTIN1	ENST00000524510.1|ENSG00000110400.10|OTTHUMG00000166177.3|OTTHUMT00000388235.1|NECTIN1-205|NECTIN1|832|processed_transcript|	processed_transcript	0.0768814	0.951506	2.33022	0.0278186
NEK11	ENST00000514915.5|ENSG00000114670.13|OTTHUMG00000159654.13|OTTHUMT00000356759.1|NEK11-215|NEK11|2863|nonsense_mediated_decay|	nonsense_mediated_decay	-0.482246	0.532864	1.98639	0.0212184
NEK6	ENST00000320246.9|ENSG00000119408.16|OTTHUMG00000020650.2|OTTHUMT00000054016.1|NEK6-201|NEK6|3447|protein_coding|	protein_coding	0.293028	0.680053	1.71701	0.0230105
NEK9	ENST00000553945.1|ENSG00000119638.12|OTTHUMG00000171768.3|OTTHUMT00000415031.1|NEK9-203|NEK9|786|nonsense_mediated_decay|	nonsense_mediated_decay	0.0277553	0.967488	1.49418	0.00997542
NELL2	ENST00000549668.1|ENSG00000184613.10|OTTHUMG00000169464.2|OTTHUMT00000404189.1|NELL2-213|NELL2|607|retained_intron|	retained_intron	-0.199933	0.683424	1.30238	0.00394879
NET1	ENST00000449083.5|ENSG00000173848.18|OTTHUMG00000017596.3|OTTHUMT00000046551.1|NET1-203|NET1|637|protein_coding|	protein_coding	-0.185952	0.585833	-1.25949	0.0152235
NFATC1	ENST00000590172.1|ENSG00000131196.17|OTTHUMG00000132897.5|OTTHUMT00000450517.1|NFATC1-211|NFATC1|1668|processed_transcript|	processed_transcript	-0.901457	0.000516195	-1.04007	0.00883583
NFATC1	ENST00000318065.9|ENSG00000131196.17|OTTHUMG00000132897.5|OTTHUMT00000256400.2|NFATC1-202|NFATC1|4302|protein_coding|	protein_coding	-1.01079	0.13804	1.80414	0.00443987
NFATC3	ENST00000539828.6|ENSG00000072736.18|OTTHUMG00000137555.6|OTTHUMT00000407499.1|NFATC3-206|NFATC3|2484|nonsense_mediated_decay|	nonsense_mediated_decay	-0.560607	0.293697	1.5183	0.00161287
NFATC4	ENST00000556759.5|ENSG00000100968.13|OTTHUMG00000029351.12|OTTHUMT00000414149.1|NFATC4-228|NFATC4|2025|protein_coding|	protein_coding	-0.987982	0.105184	1.47227	0.0123417
NFATC4	ENST00000553708.5|ENSG00000100968.13|OTTHUMG00000029351.12|OTTHUMT00000414139.1|NFATC4-208|NFATC4|5367|protein_coding|	protein_coding	-1.71785	0.124643	3.21931	5.7919e-06
NFE2L1	ENST00000583378.5|ENSG00000082641.15|OTTHUMG00000178706.4|OTTHUMT00000443036.1|NFE2L1-218|NFE2L1|2051|protein_coding|	protein_coding	0.109175	0.869896	1.86007	0.00338059
NFE2L1	ENST00000577411.5|ENSG00000082641.15|OTTHUMG00000178706.4|OTTHUMT00000443032.2|NFE2L1-205|NFE2L1|562|protein_coding|	protein_coding	0.0543226	0.908244	-1.93269	0.00625888
NFE2L1	ENST00000581319.1|ENSG00000082641.15|OTTHUMG00000178706.4|OTTHUMT00000443040.1|NFE2L1-212|NFE2L1|481|protein_coding|	protein_coding	0.037441	0.974566	3.69792	4.59981e-06
NFIA	ENST00000357977.5|ENSG00000162599.15|OTTHUMG00000008618.8|OTTHUMT00000023800.5|NFIA-201|NFIA|3200|protein_coding|	protein_coding	2.32867	2.64683e-10	1.44008	0.0083511
NFIC	ENST00000589537.1|ENSG00000141905.18|OTTHUMG00000180731.8|OTTHUMT00000453006.1|NFIC-208|NFIC|977|retained_intron|	retained_intron	1.00416	0.0080326	-1.97919	0.0181165
NFIC	ENST00000341919.7|ENSG00000141905.18|OTTHUMG00000180731.8|OTTHUMT00000452832.1|NFIC-201|NFIC|1573|protein_coding|	protein_coding	-0.0450699	0.891606	1.12242	0.000517971
NFIX	ENST00000588680.1|ENSG00000008441.16|OTTHUMG00000180726.4|OTTHUMT00000452774.1|NFIX-211|NFIX|319|processed_transcript|	processed_transcript	-0.573812	0.252319	-1.49389	0.0448161
NFIX	ENST00000587260.1|ENSG00000008441.16|OTTHUMG00000180726.4|OTTHUMT00000452773.1|NFIX-208|NFIX|1537|protein_coding|	protein_coding	-1.38114	9.40185e-06	0.722456	0.0473975
NFXL1	ENST00000502448.5|ENSG00000170448.11|OTTHUMG00000128621.4|OTTHUMT00000361640.1|NFXL1-204|NFXL1|1760|retained_intron|	retained_intron	-1.51504	0.0132706	-2.23846	0.0214158
NFYC	ENST00000427410.6|ENSG00000066136.20|OTTHUMG00000007729.5|OTTHUMT00000020797.2|NFYC-211|NFYC|1379|protein_coding|	protein_coding	1.74097	0.0125894	2.1032	0.0281273
NGDN	ENST00000556483.5|ENSG00000129460.15|OTTHUMG00000171501.5|OTTHUMT00000414068.1|NGDN-209|NGDN|838|protein_coding|	protein_coding	-0.681044	0.405383	2.00793	0.00512074
NID2	ENST00000555310.1|ENSG00000087303.17|OTTHUMG00000140298.2|OTTHUMT00000411606.1|NID2-204|NID2|727|retained_intron|	retained_intron	-1.38787	0.000234641	-1.28491	0.0237302
NID2	ENST00000617139.4|ENSG00000087303.17|OTTHUMG00000140298.2|-|NID2-208|NID2|3827|protein_coding|	protein_coding	0.163204	0.782473	1.23265	0.0449013
NINJ1	ENST00000470314.5|ENSG00000131669.9|OTTHUMG00000020242.2|OTTHUMT00000053126.1|NINJ1-203|NINJ1|834|processed_transcript|	processed_transcript	-1.14379	0.047748	2.21333	1.85474e-05
NIT1	ENST00000479728.1|ENSG00000158793.13|OTTHUMG00000031473.2|OTTHUMT00000080670.1|NIT1-210|NIT1|703|processed_transcript|	processed_transcript	-1.32836	0.00484954	1.8791	4.34703e-05
NKIRAS2	ENST00000393885.8|ENSG00000168256.17|OTTHUMG00000133503.4|OTTHUMT00000257448.2|NKIRAS2-206|NKIRAS2|1909|protein_coding|	protein_coding	0.373752	0.0206014	-1.39968	4.59939e-07
NKIRAS2	ENST00000587337.1|ENSG00000168256.17|OTTHUMG00000133503.4|OTTHUMT00000449771.2|NKIRAS2-214|NKIRAS2|563|protein_coding|	protein_coding	-0.215935	0.823599	2.20428	0.0070726
NLGN4Y	ENST00000476359.1|ENSG00000165246.13|OTTHUMG00000036618.3|OTTHUMT00000089064.2|NLGN4Y-207|NLGN4Y|5460|processed_transcript|	processed_transcript	0.536718	0.484598	1.83245	0.0198929
NLRC5	ENST00000538453.5|ENSG00000140853.15|OTTHUMG00000133470.6|OTTHUMT00000398395.1|NLRC5-213|NLRC5|4121|nonsense_mediated_decay|	nonsense_mediated_decay	0.227763	0.809469	1.75739	0.0491712
NLRP1	ENST00000572272.5|ENSG00000091592.15|OTTHUMG00000132419.7|OTTHUMT00000439517.2|NLRP1-210|NLRP1|4422|protein_coding|	protein_coding	-0.764562	0.20695	1.63632	0.00701454
NME3	ENST00000568561.5|ENSG00000103024.7|OTTHUMG00000128635.3|OTTHUMT00000433361.2|NME3-211|NME3|813|nonsense_mediated_decay|	nonsense_mediated_decay	0.0727422	0.932405	2.87739	9.96671e-05
NMT1	ENST00000592782.5|ENSG00000136448.11|OTTHUMG00000180003.2|OTTHUMT00000449239.1|NMT1-213|NMT1|4999|protein_coding|	protein_coding	0.505087	0.355471	1.37316	0.0412413
NOL11	ENST00000581106.5|ENSG00000130935.9|OTTHUMG00000179777.2|OTTHUMT00000448075.2|NOL11-205|NOL11|584|protein_coding|	protein_coding	0.790908	0.0394795	-1.84843	0.0379499
NOL3	ENST00000566871.5|ENSG00000140939.14|OTTHUMG00000173316.3|OTTHUMT00000422743.2|NOL3-209|NOL3|752|protein_coding|	protein_coding	0.761439	0.15922	1.99225	0.00096333
NOL8	ENST00000536593.5|ENSG00000198000.11|OTTHUMG00000020221.6|OTTHUMT00000402683.1|NOL8-217|NOL8|4053|nonsense_mediated_decay|	nonsense_mediated_decay	0.655677	0.101967	-1.62764	0.0448142
NONO	ENST00000474431.5|ENSG00000147140.15|OTTHUMG00000021798.3|OTTHUMT00000057147.1|NONO-212|NONO|644|processed_transcript|	processed_transcript	0.00697494	0.992393	1.40972	0.040887
NOP14	ENST00000398071.4|ENSG00000087269.15|OTTHUMG00000159911.4|OTTHUMT00000358170.2|NOP14-202|NOP14|2535|protein_coding|	protein_coding	1.9151	0.00530215	2.94788	0.000409181
NOP2	ENST00000542919.1|ENSG00000111641.11|OTTHUMG00000169163.2|OTTHUMT00000402620.1|NOP2-215|NOP2|894|retained_intron|	retained_intron	1.38165	0.000260831	1.12355	0.0476044
NOP53	ENST00000594182.1|ENSG00000105373.18|OTTHUMG00000183059.1|OTTHUMT00000464881.1|NOP53-202|NOP53|303|protein_coding|	protein_coding	-1.14086	3.81098e-10	0.553639	0.0140077
NOP56	ENST00000445139.1|ENSG00000101361.16|OTTHUMG00000031703.6|OTTHUMT00000077638.2|NOP56-203|NOP56|856|protein_coding|	protein_coding	2.21044	2.4585e-07	2.0034	0.000566374
NOS3	ENST00000461406.5|ENSG00000164867.10|OTTHUMG00000158343.4|OTTHUMT00000351548.2|NOS3-203|NOS3|3644|protein_coding|	protein_coding	-1.26313	0.105208	1.586	0.0243661
NOS3	ENST00000477227.1|ENSG00000164867.10|OTTHUMG00000158343.4|OTTHUMT00000351574.1|NOS3-209|NOS3|1111|processed_transcript|	processed_transcript	-0.429762	0.478088	1.78209	0.00102215
NOSTRIN	ENST00000397206.6|ENSG00000163072.15|OTTHUMG00000153990.20|OTTHUMT00000338585.2|NOSTRIN-202|NOSTRIN|1446|protein_coding|	protein_coding	-0.482277	0.495206	-2.29642	0.0243182
NPAS1	ENST00000439365.6|ENSG00000130751.9|OTTHUMG00000183440.1|OTTHUMT00000466661.1|NPAS1-201|NPAS1|1341|protein_coding|	protein_coding	-0.470972	0.439464	1.26487	0.0350247
NPC2	ENST00000553490.5|ENSG00000119655.10|OTTHUMG00000171212.2|OTTHUMT00000412349.2|NPC2-204|NPC2|729|protein_coding|	protein_coding	0.0362949	0.97119	2.60523	0.00359682
NPC2	ENST00000556009.5|ENSG00000119655.10|OTTHUMG00000171212.2|OTTHUMT00000412350.1|NPC2-208|NPC2|699|protein_coding|	protein_coding	-0.239648	0.0300093	-1.0139	6.11846e-10
NPIPB12	ENST00000547235.5|ENSG00000169203.16|OTTHUMG00000163547.2|OTTHUMT00000409310.1|NPIPB12-202|NPIPB12|710|nonsense_mediated_decay|	nonsense_mediated_decay	0.32594	0.517706	-3.24527	0.00669751
NPIPB4	ENST00000542133.5|ENSG00000185864.16|OTTHUMG00000163555.7|OTTHUMT00000402329.1|NPIPB4-215|NPIPB4|910|nonsense_mediated_decay|	nonsense_mediated_decay	0.375544	0.377437	1.2071	0.0193368
NPIPB5	ENST00000442450.2|ENSG00000243716.10|OTTHUMG00000163573.6|OTTHUMT00000402487.1|NPIPB5-206|NPIPB5|852|retained_intron|	retained_intron	-0.334445	0.623556	-2.0312	0.0491693
NPIPB6	ENST00000532254.1|ENSG00000198156.10|OTTHUMG00000166319.2|OTTHUMT00000389133.1|NPIPB6-201|NPIPB6|2016|protein_coding|	protein_coding	-0.245508	0.732317	1.52385	0.0473277
NPLOC4	ENST00000573519.5|ENSG00000182446.13|OTTHUMG00000177990.4|OTTHUMT00000440144.2|NPLOC4-213|NPLOC4|654|protein_coding|	protein_coding	1.30133	0.000255295	1.13372	0.0292628
NPM1	ENST00000523339.1|ENSG00000181163.13|OTTHUMG00000130465.4|OTTHUMT00000372227.1|NPM1-210|NPM1|268|retained_intron|	retained_intron	0.665697	1.40268e-05	-1.07692	2.19085e-05
NPM1	ENST00000393820.2|ENSG00000181163.13|OTTHUMG00000130465.4|OTTHUMT00000372224.1|NPM1-203|NPM1|1598|protein_coding|	protein_coding	1.00608	2.03759e-31	-0.264022	0.0224278
NPM3	ENST00000468544.1|ENSG00000107833.10|OTTHUMG00000018942.2|OTTHUMT00000050005.1|NPM3-203|NPM3|393|processed_transcript|	processed_transcript	0.871849	0.207164	2.53906	0.000344327
NPRL2	ENST00000493465.5|ENSG00000114388.12|OTTHUMG00000156864.2|OTTHUMT00000346317.1|NPRL2-216|NPRL2|462|processed_transcript|	processed_transcript	-0.242604	0.462721	-1.23288	0.0262637
NPTN	ENST00000351217.10|ENSG00000156642.16|OTTHUMG00000137586.6|OTTHUMT00000268981.2|NPTN-202|NPTN|2817|protein_coding|	protein_coding	0.0923975	0.853103	1.32592	0.00885395
NR1H2	ENST00000595730.5|ENSG00000131408.13|OTTHUMG00000183036.5|OTTHUMT00000464722.1|NR1H2-205|NR1H2|713|retained_intron|	retained_intron	-0.114282	0.842947	-2.23926	0.0053391
NR1H3	ENST00000494018.1|ENSG00000025434.18|OTTHUMG00000150628.10|OTTHUMT00000319238.1|NR1H3-225|NR1H3|510|retained_intron|	retained_intron	-1.33926	2.59518e-05	-0.965432	0.0287686
NR2F2	ENST00000559679.1|ENSG00000185551.14|OTTHUMG00000149848.6|OTTHUMT00000415373.4|NR2F2-205|NR2F2|382|protein_coding|	protein_coding	-0.202628	0.749322	1.731	0.0015687
NR4A1	ENST00000550082.5|ENSG00000123358.19|OTTHUMG00000150393.7|OTTHUMT00000404960.1|NR4A1-213|NR4A1|2029|protein_coding|	protein_coding	-0.421451	0.463345	2.32761	0.000502295
NRBP2	ENST00000530347.1|ENSG00000185189.17|OTTHUMG00000165157.2|OTTHUMT00000382254.2|NRBP2-206|NRBP2|1037|protein_coding|	protein_coding	-0.0464355	0.954126	2.11833	0.000661446
NRP1	ENST00000431894.5|ENSG00000099250.17|OTTHUMG00000019343.5|OTTHUMT00000051209.1|NRP1-211|NRP1|372|protein_coding|	protein_coding	-0.556011	0.318355	1.58996	0.0109637
NRSN2	ENST00000621012.1|ENSG00000125841.12|OTTHUMG00000031628.5|-|NRSN2-210|NRSN2|1852|protein_coding|	protein_coding	-0.397211	0.398147	1.0703	0.0495929
NRXN2	ENST00000423049.1|ENSG00000110076.18|OTTHUMG00000045214.18|OTTHUMT00000141955.14|NRXN2-207|NRXN2|828|protein_coding|	protein_coding	-1.01973	0.018477	1.26465	0.00613604
NSF	ENST00000575068.5|ENSG00000073969.18|OTTHUMG00000134315.6|OTTHUMT00000440425.1|NSF-206|NSF|2667|protein_coding|	protein_coding	1.0392	0.126058	2.43678	0.00590232
NSFL1C	ENST00000381653.9|ENSG00000088833.17|OTTHUMG00000031665.7|OTTHUMT00000077526.3|NSFL1C-203|NSFL1C|1446|nonsense_mediated_decay|	nonsense_mediated_decay	1.46001	1.19849e-11	0.782283	0.0153335
NSMCE2	ENST00000523824.5|ENSG00000156831.7|OTTHUMG00000164993.5|OTTHUMT00000381423.1|NSMCE2-213|NSMCE2|592|retained_intron|	retained_intron	-0.00634232	0.984622	-1.85654	0.000309946
NSRP1	ENST00000475652.5|ENSG00000126653.17|OTTHUMG00000132754.7|OTTHUMT00000256122.4|NSRP1-204|NSRP1|1242|nonsense_mediated_decay|	nonsense_mediated_decay	0.821997	0.257622	2.76032	6.48699e-05
NT5C	ENST00000580423.5|ENSG00000125458.6|OTTHUMG00000179346.2|OTTHUMT00000445856.1|NT5C-208|NT5C|450|protein_coding|	protein_coding	0.816869	0.00848769	1.27834	0.00165597
NTAN1	ENST00000567420.1|ENSG00000157045.8|OTTHUMG00000129849.3|OTTHUMT00000422443.1|NTAN1-207|NTAN1|339|retained_intron|	retained_intron	-0.122454	0.861417	1.4031	0.0251732
NTHL1	ENST00000565406.5|ENSG00000065057.7|OTTHUMG00000128744.3|OTTHUMT00000434458.1|NTHL1-206|NTHL1|691|retained_intron|	retained_intron	0.707066	0.170475	1.69368	0.00534437
NTM	ENST00000467255.5|ENSG00000182667.14|OTTHUMG00000066364.16|OTTHUMT00000316011.1|NTM-210|NTM|827|processed_transcript|	processed_transcript	-1.49928	0.00404834	-1.83111	0.0260438
NTM	ENST00000427481.6|ENSG00000182667.14|OTTHUMG00000066364.16|-|NTM-206|NTM|2583|protein_coding|	protein_coding	-2.24772	8.1451e-08	-1.16907	0.0188297
NTN4	ENST00000538383.5|ENSG00000074527.11|OTTHUMG00000170290.2|OTTHUMT00000408374.1|NTN4-203|NTN4|1971|protein_coding|	protein_coding	0.279821	0.757959	2.60292	0.000915985
NTPCR	ENST00000496662.5|ENSG00000135778.11|OTTHUMG00000037822.3|OTTHUMT00000092328.1|NTPCR-208|NTPCR|882|processed_transcript|	processed_transcript	-0.517251	0.400153	-2.28163	0.00917132
NUB1	ENST00000460712.1|ENSG00000013374.15|OTTHUMG00000157365.4|OTTHUMT00000348646.1|NUB1-202|NUB1|664|protein_coding|	protein_coding	0.444567	0.503145	1.92013	0.00329355
NUBP2	ENST00000565603.5|ENSG00000095906.16|OTTHUMG00000128639.5|OTTHUMT00000433375.1|NUBP2-207|NUBP2|995|retained_intron|	retained_intron	-0.133596	0.834677	-2.65042	0.0245831
NUBP2	ENST00000262302.13|ENSG00000095906.16|OTTHUMG00000128639.5|OTTHUMT00000250510.1|NUBP2-201|NUBP2|1413|protein_coding|	protein_coding	1.07149	3.36024e-12	0.483003	0.0404307
NUDT1	ENST00000343985.8|ENSG00000106268.15|OTTHUMG00000023072.6|OTTHUMT00000206924.1|NUDT1-202|NUDT1|771|protein_coding|	protein_coding	1.41014	0.00203796	1.41512	0.0291877
NUDT12	ENST00000507423.1|ENSG00000112874.9|OTTHUMG00000128739.2|OTTHUMT00000370367.1|NUDT12-202|NUDT12|1781|protein_coding|	protein_coding	0.0994618	0.691268	-1.11258	0.00217673
NUP214	ENST00000453861.6|ENSG00000126883.16|OTTHUMG00000020816.6|OTTHUMT00000383974.1|NUP214-204|NUP214|3208|nonsense_mediated_decay|	nonsense_mediated_decay	-0.550351	0.428204	1.62272	0.0252827
NUP62	ENST00000597029.5|ENSG00000213024.11|OTTHUMG00000183077.4|OTTHUMT00000464989.1|NUP62-211|NUP62|2053|protein_coding|	protein_coding	1.97085	0.0133642	4.1588	4.11832e-07
NUP93	ENST00000567641.5|ENSG00000102900.12|OTTHUMG00000133278.12|OTTHUMT00000432397.2|NUP93-215|NUP93|604|protein_coding|	protein_coding	0.751294	0.165231	-1.69971	0.0455135
NUTM2B	ENST00000342531.2|ENSG00000188199.10|OTTHUMG00000018572.3|OTTHUMT00000048974.3|NUTM2B-201|NUTM2B|2239|protein_coding|	protein_coding	-1.16781	0.0364503	1.62766	0.0038964
NXN	ENST00000571684.5|ENSG00000167693.16|OTTHUMG00000090307.4|OTTHUMT00000437226.1|NXN-206|NXN|1159|protein_coding|	protein_coding	1.21014	0.02166	1.74837	0.0133038
OAF	ENST00000531220.1|ENSG00000184232.8|OTTHUMG00000166139.2|OTTHUMT00000388037.1|OAF-202|OAF|815|protein_coding|	protein_coding	0.620589	0.122075	1.76135	0.000130577
OAZ2	ENST00000560781.6|ENSG00000180304.14|OTTHUMG00000172473.4|OTTHUMT00000418711.2|OAZ2-208|OAZ2|540|processed_transcript|	processed_transcript	0.900789	0.135653	2.13286	0.00191472
OBSCN	ENST00000570156.6|ENSG00000154358.20|OTTHUMG00000039772.11|-|OBSCN-210|OBSCN|26925|protein_coding|	protein_coding	1.23663	0.143342	2.42056	0.0165564
OBSCN	ENST00000284548.15|ENSG00000154358.20|OTTHUMG00000039772.11|OTTHUMT00000095986.2|OBSCN-201|OBSCN|20432|protein_coding|	protein_coding	0.918492	0.00521515	1.10937	0.0164224
OCIAD1	ENST00000512236.5|ENSG00000109180.14|OTTHUMG00000102095.19|OTTHUMT00000367288.2|OCIAD1-224|OCIAD1|594|protein_coding|	protein_coding	0.0290851	0.946266	-1.25536	0.0406675
OCIAD2	ENST00000510159.1|ENSG00000145247.11|OTTHUMG00000128626.34|OTTHUMT00000361986.3|OCIAD2-206|OCIAD2|432|nonsense_mediated_decay|	nonsense_mediated_decay	0.723254	0.206332	2.04928	0.0011255
OLFM1	ENST00000252854.8|ENSG00000130558.19|OTTHUMG00000020897.4|OTTHUMT00000054971.1|OLFM1-201|OLFM1|2591|protein_coding|	protein_coding	-1.26582	0.23662	2.6585	0.000671944
OLFM2	ENST00000593091.1|ENSG00000105088.8|OTTHUMG00000180390.2|OTTHUMT00000451122.2|OLFM2-205|OLFM2|1226|protein_coding|	protein_coding	-1.60017	6.1396e-12	0.595062	0.0158575
ORAI1	ENST00000611718.1|ENSG00000276045.2|OTTHUMG00000169073.3|OTTHUMT00000402152.3|ORAI1-201|ORAI1|852|protein_coding|	protein_coding	-0.286757	0.573673	1.77977	0.000226597
ORAOV1	ENST00000538554.6|ENSG00000149716.12|OTTHUMG00000167885.6|OTTHUMT00000397437.4|ORAOV1-209|ORAOV1|1000|protein_coding|	protein_coding	-2.14126	0.000662604	1.67296	0.00326797
OS9	ENST00000552285.5|ENSG00000135506.15|OTTHUMG00000170284.2|OTTHUMT00000408342.1|OS9-220|OS9|2135|protein_coding|	protein_coding	0.281742	0.82307	2.44851	0.0265645
OS9	ENST00000547079.5|ENSG00000135506.15|OTTHUMG00000170284.2|OTTHUMT00000408346.2|OS9-209|OS9|583|protein_coding|	protein_coding	-0.190153	0.878015	4.26409	3.11501e-06
OSBP2	ENST00000446658.6|ENSG00000184792.15|OTTHUMG00000151153.6|OTTHUMT00000321551.1|OSBP2-211|OSBP2|2836|protein_coding|	protein_coding	1.79415	0.00036477	1.60363	0.0270799
OSBP2	ENST00000535268.5|ENSG00000184792.15|OTTHUMG00000151153.6|-|OSBP2-219|OSBP2|3248|protein_coding|	protein_coding	-1.79454	0.000680873	-1.83808	0.0256889
OSBPL5	ENST00000525498.5|ENSG00000021762.19|OTTHUMG00000011702.7|OTTHUMT00000383724.2|OSBPL5-210|OSBPL5|2733|protein_coding|	protein_coding	0.477211	0.508983	2.83437	2.96097e-05
OSBPL9	ENST00000371714.5|ENSG00000117859.18|OTTHUMG00000008234.8|OTTHUMT00000022581.4|OSBPL9-202|OSBPL9|3352|protein_coding|	protein_coding	-1.38667	0.000713806	0.898347	0.021169
OTUD6B	ENST00000617869.4|ENSG00000155100.10|OTTHUMG00000150758.4|-|OTUD6B-206|OTUD6B|3294|protein_coding|	protein_coding	0.560913	0.239993	-1.99791	0.042528
OXA1L	ENST00000481218.1|ENSG00000155463.12|OTTHUMG00000028691.9|OTTHUMT00000347751.1|OXA1L-207|OXA1L|1596|retained_intron|	retained_intron	-0.737059	0.0970802	-2.89185	0.000998176
OXA1L	ENST00000285848.9|ENSG00000155463.12|OTTHUMG00000028691.9|-|OXA1L-201|OXA1L|1719|protein_coding|	protein_coding	0.37461	0.560184	1.76344	0.033468
OXA1L	ENST00000495424.5|ENSG00000155463.12|OTTHUMG00000028691.9|OTTHUMT00000071631.1|OXA1L-209|OXA1L|1679|retained_intron|	retained_intron	1.22965	0.263855	4.0331	3.96515e-05
OXLD1	ENST00000374741.3|ENSG00000204237.4|OTTHUMG00000178063.2|OTTHUMT00000440380.1|OXLD1-201|OXLD1|620|protein_coding|	protein_coding	0.412876	0.384217	1.1855	0.0448256
P2RX4	ENST00000543318.5|ENSG00000135124.14|OTTHUMG00000169155.2|OTTHUMT00000402549.1|P2RX4-212|P2RX4|1429|nonsense_mediated_decay|	nonsense_mediated_decay	-0.248238	0.666773	-4.41643	0.000858337
P2RX4	ENST00000337233.8|ENSG00000135124.14|OTTHUMG00000169155.2|OTTHUMT00000402545.1|P2RX4-202|P2RX4|2032|protein_coding|	protein_coding	0.164844	0.799836	1.71122	0.028454
P2RX4	ENST00000542067.5|ENSG00000135124.14|OTTHUMG00000169155.2|OTTHUMT00000402554.2|P2RX4-210|P2RX4|1084|protein_coding|	protein_coding	-0.171903	0.757204	1.33751	0.0162748
P3H4	ENST00000592026.1|ENSG00000141696.12|OTTHUMG00000133501.6|OTTHUMT00000449103.1|P3H4-208|P3H4|662|protein_coding|	protein_coding	0.095558	0.85626	1.07275	0.0483627
P4HB	ENST00000575069.5|ENSG00000185624.14|OTTHUMG00000150269.7|OTTHUMT00000439695.1|P4HB-220|P4HB|2453|nonsense_mediated_decay|	nonsense_mediated_decay	1.03753	6.23972e-30	0.239899	0.0460301
PABPC1	ENST00000522658.5|ENSG00000070756.15|OTTHUMG00000164779.3|OTTHUMT00000380222.1|PABPC1-220|PABPC1|736|protein_coding|	protein_coding	0.84593	0.0116961	1.06028	0.0243275
PACRGL	ENST00000360916.9|ENSG00000163138.18|OTTHUMG00000128550.18|OTTHUMT00000250393.3|PACRGL-202|PACRGL|2073|protein_coding|	protein_coding	-0.285511	0.738505	1.57937	0.0427605
PACS1	ENST00000529757.5|ENSG00000175115.11|OTTHUMG00000166889.4|OTTHUMT00000391696.1|PACS1-209|PACS1|1688|protein_coding|	protein_coding	0.498428	0.398796	2.39267	4.7789e-05
PACSIN2	ENST00000403744.7|ENSG00000100266.18|OTTHUMG00000150701.7|OTTHUMT00000319669.1|PACSIN2-204|PACSIN2|2110|protein_coding|	protein_coding	0.875215	0.257724	2.62718	0.0014535
PACSIN2	ENST00000402229.5|ENSG00000100266.18|OTTHUMG00000150701.7|OTTHUMT00000319668.1|PACSIN2-203|PACSIN2|1883|protein_coding|	protein_coding	-1.73017	0.0793051	2.62732	5.35128e-05
PACSIN3	ENST00000530513.5|ENSG00000165912.15|OTTHUMG00000166870.5|OTTHUMT00000391677.2|PACSIN3-207|PACSIN3|912|protein_coding|	protein_coding	0.609817	0.330303	1.66401	0.0148012
PAFAH1B3	ENST00000595530.5|ENSG00000079462.7|OTTHUMG00000182795.2|OTTHUMT00000463728.2|PAFAH1B3-204|PAFAH1B3|582|protein_coding|	protein_coding	0.634329	0.147206	1.23132	0.0292911
PAK1	ENST00000527535.5|ENSG00000149269.9|OTTHUMG00000165138.4|OTTHUMT00000382139.1|PAK1-209|PAK1|576|nonsense_mediated_decay|	nonsense_mediated_decay	-0.154967	0.825116	1.96667	0.0101253
PAK4	ENST00000599470.5|ENSG00000130669.17|OTTHUMG00000182800.2|OTTHUMT00000463814.1|PAK4-209|PAK4|1715|protein_coding|	protein_coding	0.679746	0.279134	1.91681	0.00431628
PALM	ENST00000589012.5|ENSG00000099864.17|OTTHUMG00000181785.11|OTTHUMT00000457595.3|PALM-206|PALM|579|retained_intron|	retained_intron	-0.382349	0.67146	2.61954	0.000247356
PAM	ENST00000304400.11|ENSG00000145730.20|OTTHUMG00000128729.5|OTTHUMT00000381031.1|PAM-201|PAM|3156|protein_coding|	protein_coding	0.594243	0.637811	2.70802	0.0228867
PAN2	ENST00000550028.1|ENSG00000135473.14|OTTHUMG00000170412.5|OTTHUMT00000409047.1|PAN2-215|PAN2|583|retained_intron|	retained_intron	-0.135993	0.589363	-1.10993	0.00443111
PAPOLA	ENST00000556619.5|ENSG00000090060.17|OTTHUMG00000171441.4|OTTHUMT00000413478.2|PAPOLA-221|PAPOLA|584|protein_coding|	protein_coding	0.0385042	0.933718	-1.45079	0.0282598
PAQR6	ENST00000292291.9|ENSG00000160781.15|OTTHUMG00000017490.5|OTTHUMT00000046297.2|PAQR6-201|PAQR6|1908|protein_coding|	protein_coding	-0.458393	0.500588	1.7	0.0466725
PARG	ENST00000614063.4|ENSG00000227345.8|OTTHUMG00000018201.3|OTTHUMT00000476843.1|PARG-206|PARG|3473|nonsense_mediated_decay|	nonsense_mediated_decay	0.422377	0.0632229	-1.06243	0.00669884
PARK7	ENST00000493678.5|ENSG00000116288.12|OTTHUMG00000001210.3|OTTHUMT00000003577.1|PARK7-209|PARK7|1088|protein_coding|	protein_coding	0.0713794	0.887239	1.2372	0.0163092
PARL	ENST00000639100.1|ENSG00000175193.13|OTTHUMG00000191959.1|OTTHUMT00000491391.1|PARL-212|PARL|1513|protein_coding|	protein_coding	0.242942	0.718745	1.51866	0.0446812
PARP10	ENST00000313059.9|ENSG00000178685.13|OTTHUMG00000165408.3|OTTHUMT00000383871.2|PARP10-202|PARP10|1090|protein_coding|	protein_coding	0.410532	0.518185	-2.61917	0.0194294
PARVB	ENST00000477438.1|ENSG00000188677.14|OTTHUMG00000150665.5|OTTHUMT00000319525.1|PARVB-206|PARVB|421|processed_transcript|	processed_transcript	-0.515746	0.388046	-2.69983	0.0342263
PAX9	ENST00000402703.6|ENSG00000198807.12|OTTHUMG00000140251.3|-|PAX9-202|PAX9|3104|protein_coding|	protein_coding	2.87416	2.46889e-08	1.67727	0.0427493
PBXIP1	ENST00000368465.5|ENSG00000163346.16|OTTHUMG00000037369.5|OTTHUMT00000090945.1|PBXIP1-203|PBXIP1|3144|protein_coding|	protein_coding	-2.70849	3.4431e-05	-3.72084	0.00213747
PCBP1-AS1	ENST00000452431.5|ENSG00000179818.13|OTTHUMG00000153728.20|OTTHUMT00000329620.3|PCBP1-AS1-237|PCBP1-AS1|1194|antisense_RNA|	antisense_RNA	-0.802948	0.149794	-2.60891	0.0018351
PCBP4	ENST00000468324.5|ENSG00000090097.21|OTTHUMG00000157366.32|OTTHUMT00000348610.2|PCBP4-207|PCBP4|704|protein_coding|	protein_coding	-0.22416	0.733886	1.79625	0.019393
PCDH7	ENST00000361762.3|ENSG00000169851.15|OTTHUMG00000160364.4|OTTHUMT00000360366.2|PCDH7-201|PCDH7|6403|protein_coding|	protein_coding	1.09682	2.26487e-21	0.357441	0.0287054
PCDH7	ENST00000621961.1|ENSG00000169851.15|OTTHUMG00000160364.4|OTTHUMT00000476519.1|PCDH7-208|PCDH7|2029|protein_coding|	protein_coding	0.488909	0.0279403	-1.73594	2.08113e-05
PCDH7	ENST00000509759.2|ENSG00000169851.15|OTTHUMG00000160364.4|OTTHUMT00000360370.2|PCDH7-203|PCDH7|865|protein_coding|	protein_coding	-2.07174	4.86889e-09	0.671444	0.0361061
PCDHB2	ENST00000622947.1|ENSG00000112852.6|OTTHUMG00000129606.5|OTTHUMT00000478855.1|PCDHB2-202|PCDHB2|2231|protein_coding|	protein_coding	-1.36814	0.0451629	1.7063	0.00297277
PCDHGC3	ENST00000616230.1|ENSG00000240184.6|OTTHUMG00000129613.7|OTTHUMT00000476718.1|PCDHGC3-203|PCDHGC3|937|processed_transcript|	processed_transcript	1.18069	0.063006	-3.13454	0.00616538
PCED1A	ENST00000356872.7|ENSG00000132635.16|OTTHUMG00000031716.7|OTTHUMT00000077674.2|PCED1A-201|PCED1A|1706|protein_coding|	protein_coding	0.431292	0.139928	-1.07333	0.0375645
PCGF2	ENST00000610747.1|ENSG00000277258.4|OTTHUMG00000188501.1|OTTHUMT00000477448.1|PCGF2-201|PCGF2|459|protein_coding|	protein_coding	-0.821801	0.120717	1.77261	0.00065778
PCID2	ENST00000480971.5|ENSG00000126226.21|OTTHUMG00000017385.4|OTTHUMT00000045909.1|PCID2-212|PCID2|701|processed_transcript|	processed_transcript	0.666564	0.268577	-1.88359	0.0461308
PCLAF	ENST00000560234.1|ENSG00000166803.11|OTTHUMG00000133017.4|OTTHUMT00000418701.1|PCLAF-208|PCLAF|690|processed_transcript|	processed_transcript	0.106403	0.80444	-1.32763	0.0334061
PCM1	ENST00000524356.1|ENSG00000078674.17|OTTHUMG00000163699.7|OTTHUMT00000374805.2|PCM1-223|PCM1|577|retained_intron|	retained_intron	0.196608	0.756177	1.66794	0.00360011
PCMT1	ENST00000367380.9|ENSG00000120265.16|OTTHUMG00000015794.4|-|PCMT1-202|PCMT1|1628|protein_coding|	protein_coding	-0.762725	0.0665044	1.14151	0.015166
PCNX2	ENST00000462233.5|ENSG00000135749.18|OTTHUMG00000037824.7|OTTHUMT00000092484.2|PCNX2-206|PCNX2|3392|nonsense_mediated_decay|	nonsense_mediated_decay	-0.654876	0.315223	2.03082	0.00388321
PCSK6	ENST00000611716.4|ENSG00000140479.16|OTTHUMG00000172097.11|OTTHUMT00000416811.7|PCSK6-214|PCSK6|4409|protein_coding|	protein_coding	0.0988943	0.839963	1.7535	0.00162664
PCSK6	ENST00000558433.5|ENSG00000140479.16|OTTHUMG00000172097.11|OTTHUMT00000416893.1|PCSK6-205|PCSK6|543|processed_transcript|	processed_transcript	0.419944	0.494931	1.35411	0.046679
PCSK9	ENST00000302118.5|ENSG00000169174.10|OTTHUMG00000008136.1|OTTHUMT00000022280.1|PCSK9-201|PCSK9|3637|protein_coding|	protein_coding	2.86875	7.69032e-37	0.654036	0.0301584
PDCD10	ENST00000487947.6|ENSG00000114209.14|OTTHUMG00000158415.5|OTTHUMT00000351068.2|PDCD10-214|PDCD10|716|protein_coding|	protein_coding	1.57635	0.0140699	2.24532	0.00631359
PDCD4	ENST00000489049.5|ENSG00000150593.17|OTTHUMG00000019048.2|OTTHUMT00000050368.1|PDCD4-209|PDCD4|547|processed_transcript|	processed_transcript	-0.907458	0.18008	1.52143	0.020467
PDCD6IP	ENST00000435909.5|ENSG00000170248.13|OTTHUMG00000130751.7|OTTHUMT00000342075.1|PDCD6IP-205|PDCD6IP|587|nonsense_mediated_decay|	nonsense_mediated_decay	2.44903	0.00265181	3.67771	0.000136524
PDE2A	ENST00000544570.5|ENSG00000186642.15|OTTHUMG00000102045.5|OTTHUMT00000397109.1|PDE2A-226|PDE2A|3119|protein_coding|	protein_coding	0.575264	0.551127	2.98066	0.00196764
PDE4A	ENST00000440014.6|ENSG00000065989.15|OTTHUMG00000180411.4|OTTHUMT00000451246.1|PDE4A-204|PDE4A|2478|protein_coding|	protein_coding	0.670648	0.317839	2.66387	0.000858637
PDGFA	ENST00000400761.7|ENSG00000197461.13|OTTHUMG00000151412.6|OTTHUMT00000322537.2|PDGFA-202|PDGFA|689|protein_coding|	protein_coding	-0.989914	0.140076	2.41615	3.55382e-05
PDHA1	ENST00000545074.5|ENSG00000131828.13|OTTHUMG00000021224.3|-|PDHA1-213|PDHA1|3391|protein_coding|	protein_coding	-0.493148	0.548401	2.51057	0.00161452
PDHX	ENST00000526309.1|ENSG00000110435.11|OTTHUMG00000166491.3|OTTHUMT00000390020.1|PDHX-205|PDHX|574|protein_coding|	protein_coding	-1.57689	0.00113404	-2.89581	0.000149334
PDLIM4	ENST00000379018.7|ENSG00000131435.12|OTTHUMG00000059645.7|OTTHUMT00000132645.1|PDLIM4-202|PDLIM4|1006|protein_coding|	protein_coding	-1.22106	1.37166e-19	0.375731	0.0135972
PDPK1	ENST00000268673.11|ENSG00000140992.18|OTTHUMG00000128874.7|OTTHUMT00000250832.2|PDPK1-201|PDPK1|4728|protein_coding|	protein_coding	-0.0642765	0.938266	1.6926	0.0228666
PDPN	ENST00000510906.5|ENSG00000162493.16|OTTHUMG00000007912.5|OTTHUMT00000367737.2|PDPN-209|PDPN|786|protein_coding|	protein_coding	1.32945	0.0379794	2.09609	0.00746427
PDXDC1	ENST00000325823.11|ENSG00000179889.18|OTTHUMG00000166304.5|-|PDXDC1-201|PDXDC1|1113|protein_coding|	protein_coding	0.763518	0.155798	-4.63574	0.00502466
PDXK	ENST00000481512.5|ENSG00000160209.18|OTTHUMG00000086870.4|OTTHUMT00000195647.1|PDXK-216|PDXK|583|processed_transcript|	processed_transcript	0.250841	0.742296	-2.50942	0.0375683
PDZD2	ENST00000397559.3|ENSG00000133401.15|OTTHUMG00000161981.6|OTTHUMT00000366614.1|PDZD2-201|PDZD2|900|processed_transcript|	processed_transcript	-0.747314	0.0110124	-1.66563	0.00163152
PDZD2	ENST00000515115.5|ENSG00000133401.15|OTTHUMG00000161981.6|OTTHUMT00000367748.1|PDZD2-212|PDZD2|672|processed_transcript|	processed_transcript	-0.612683	0.131811	1.07418	0.00702611
PER1	ENST00000585284.1|ENSG00000179094.15|OTTHUMG00000178317.4|OTTHUMT00000441537.1|PER1-219|PER1|461|retained_intron|	retained_intron	-1.18291	1.42386e-06	0.770619	0.0055149
PFDN1	ENST00000510217.1|ENSG00000113068.9|OTTHUMG00000129249.4|OTTHUMT00000373274.1|PFDN1-203|PFDN1|1091|protein_coding|	protein_coding	-0.144006	0.642193	-1.03702	0.0222842
PFKFB3	ENST00000450232.1|ENSG00000170525.19|OTTHUMG00000017621.4|OTTHUMT00000046658.1|PFKFB3-208|PFKFB3|595|protein_coding|	protein_coding	0.043151	0.942317	1.41919	0.00609511
PFKFB3	ENST00000625260.2|ENSG00000170525.19|OTTHUMG00000017621.4|-|PFKFB3-216|PFKFB3|1752|protein_coding|	protein_coding	-0.0631115	0.934945	2.0723	0.012375
PFN2	ENST00000239940.11|ENSG00000070087.13|OTTHUMG00000159683.3|OTTHUMT00000356873.2|PFN2-201|PFN2|2261|protein_coding|	protein_coding	-1.3652	0.0466202	2.24878	0.00116093
PGAP2	ENST00000464229.5|ENSG00000148985.19|OTTHUMG00000012238.14|OTTHUMT00000033993.5|PGAP2-208|PGAP2|863|protein_coding|	protein_coding	0.176887	0.84969	2.84212	9.0453e-05
PGGT1B	ENST00000514178.5|ENSG00000164219.9|OTTHUMG00000128893.5|OTTHUMT00000371026.1|PGGT1B-205|PGGT1B|553|processed_transcript|	processed_transcript	0.92485	0.000108611	-1.06105	0.0405007
PGM5	ENST00000472639.1|ENSG00000154330.12|OTTHUMG00000019966.4|OTTHUMT00000052549.1|PGM5-204|PGM5|571|processed_transcript|	processed_transcript	5.9323e-05	0.999915	1.48507	0.0431856
PHB	ENST00000506273.1|ENSG00000167085.11|OTTHUMG00000134271.10|OTTHUMT00000364816.1|PHB-207|PHB|431|processed_transcript|	processed_transcript	0.374537	0.144095	-2.88615	1.91369e-07
PHB	ENST00000512041.6|ENSG00000167085.11|OTTHUMG00000134271.10|OTTHUMT00000364811.2|PHB-212|PHB|694|protein_coding|	protein_coding	1.60505	0.000420673	1.91744	0.00144485
PHB	ENST00000434917.2|ENSG00000167085.11|OTTHUMG00000134271.10|OTTHUMT00000364664.2|PHB-204|PHB|534|protein_coding|	protein_coding	0.967867	0.00529644	-3.17933	0.00356375
PHC1	ENST00000543824.5|ENSG00000111752.10|OTTHUMG00000168275.2|OTTHUMT00000399115.1|PHC1-212|PHC1|4292|protein_coding|	protein_coding	0.599939	0.488465	1.89749	0.0381511
PHC1	ENST00000539928.1|ENSG00000111752.10|OTTHUMG00000168275.2|OTTHUMT00000399124.1|PHC1-207|PHC1|727|processed_transcript|	processed_transcript	0.0769429	0.90128	2.14576	0.000927379
PHC2	ENST00000486897.5|ENSG00000134686.18|OTTHUMG00000004133.1|OTTHUMT00000011899.1|PHC2-211|PHC2|547|processed_transcript|	processed_transcript	0.642702	0.16281	1.36938	0.0163783
PHF1	ENST00000428274.5|ENSG00000112511.17|OTTHUMG00000031105.11|OTTHUMT00000276480.6|PHF1-205|PHF1|836|protein_coding|	protein_coding	-0.375009	0.583061	1.66698	0.0260824
PHF23	ENST00000613632.4|ENSG00000040633.12|OTTHUMG00000177972.5|-|PHF23-213|PHF23|850|protein_coding|	protein_coding	0.395183	0.494431	1.55473	0.0158887
PHGDH	ENST00000641115.1|ENSG00000092621.12|OTTHUMG00000012100.6|OTTHUMT00000493313.1|PHGDH-210|PHGDH|1638|protein_coding|	protein_coding	0.891302	0.281943	2.82729	0.00118394
PHKA2	ENST00000473597.1|ENSG00000044446.11|OTTHUMG00000021222.2|OTTHUMT00000055963.1|PHKA2-205|PHKA2|514|processed_transcript|	processed_transcript	-0.30158	0.63448	1.48719	0.0277041
PHLDB1	ENST00000524713.5|ENSG00000019144.18|OTTHUMG00000166341.7|OTTHUMT00000390089.1|PHLDB1-204|PHLDB1|1591|processed_transcript|	processed_transcript	-1.48273	0.00516322	1.77442	0.00196348
PHTF2	ENST00000275575.11|ENSG00000006576.16|OTTHUMG00000155557.3|OTTHUMT00000340634.1|PHTF2-202|PHTF2|4541|protein_coding|	protein_coding	0.950206	0.085122	1.63424	0.0234222
PHYHIP	ENST00000523252.1|ENSG00000168490.13|OTTHUMG00000163776.3|OTTHUMT00000375392.2|PHYHIP-205|PHYHIP|769|protein_coding|	protein_coding	-1.07153	0.10198	1.62257	0.0175022
PI4KA	ENST00000399213.2|ENSG00000241973.10|OTTHUMG00000167440.3|OTTHUMT00000319944.1|PI4KA-202|PI4KA|1636|protein_coding|	protein_coding	-2.58895	1.24084e-05	1.08884	0.0211032
PICK1	ENST00000404072.7|ENSG00000100151.15|OTTHUMG00000151159.4|OTTHUMT00000321569.2|PICK1-202|PICK1|2164|protein_coding|	protein_coding	-0.519729	0.502045	1.86074	0.00426553
PIEZO1	ENST00000466823.2|ENSG00000103335.21|OTTHUMG00000156776.9|OTTHUMT00000430539.1|PIEZO1-204|PIEZO1|584|protein_coding|	protein_coding	0.622147	0.395104	1.77894	0.027063
PIEZO1	ENST00000566414.1|ENSG00000103335.21|OTTHUMG00000156776.9|OTTHUMT00000429939.1|PIEZO1-215|PIEZO1|564|retained_intron|	retained_intron	0.623211	0.0783628	1.07787	0.0245893
PIEZO1	ENST00000472168.1|ENSG00000103335.21|OTTHUMG00000156776.9|OTTHUMT00000345711.1|PIEZO1-205|PIEZO1|663|retained_intron|	retained_intron	0.403749	0.480972	1.38025	0.0425768
PIEZO1	ENST00000521877.1|ENSG00000103335.21|OTTHUMG00000156776.9|OTTHUMT00000380675.1|PIEZO1-214|PIEZO1|686|retained_intron|	retained_intron	-0.375722	0.499639	1.5062	0.00712767
PIGG	ENST00000453061.6|ENSG00000174227.15|OTTHUMG00000112457.8|OTTHUMT00000357494.1|PIGG-203|PIGG|3218|protein_coding|	protein_coding	1.89889	0.00201316	2.23528	0.00664724
PIGG	ENST00000508562.1|ENSG00000174227.15|OTTHUMG00000112457.8|OTTHUMT00000357616.1|PIGG-215|PIGG|570|processed_transcript|	processed_transcript	-0.664693	0.262631	1.5098	0.00911005
PIGP	ENST00000399102.5|ENSG00000185808.13|OTTHUMG00000086653.7|OTTHUMT00000194767.1|PIGP-204|PIGP|688|protein_coding|	protein_coding	-0.817565	0.0584246	-2.07716	0.0173689
PIGQ	ENST00000026218.9|ENSG00000007541.16|OTTHUMG00000168047.10|OTTHUMT00000239270.2|PIGQ-201|PIGQ|2846|protein_coding|	protein_coding	0.741013	0.196598	1.80734	0.00784924
PIGT	ENST00000545755.3|ENSG00000124155.17|OTTHUMG00000032574.23|OTTHUMT00000079435.4|PIGT-208|PIGT|1158|protein_coding|	protein_coding	-0.104934	0.836678	1.18932	0.0247675
PIK3AP1	ENST00000468783.1|ENSG00000155629.14|OTTHUMG00000018838.2|OTTHUMT00000049621.2|PIK3AP1-205|PIK3AP1|1117|processed_transcript|	processed_transcript	0.753012	0.217595	1.91809	0.00692446
PITPNB	ENST00000455418.7|ENSG00000180957.17|OTTHUMG00000150976.6|-|PITPNB-205|PITPNB|2963|protein_coding|	protein_coding	0.275204	0.773282	2.52229	0.00205538
PITPNM1	ENST00000436757.6|ENSG00000110697.12|OTTHUMG00000167675.3|OTTHUMT00000395521.1|PITPNM1-202|PITPNM1|4216|protein_coding|	protein_coding	2.55307	9.24094e-05	2.02338	0.0369405
PITPNM1	ENST00000534749.5|ENSG00000110697.12|OTTHUMG00000167675.3|OTTHUMT00000395520.1|PITPNM1-216|PITPNM1|4189|protein_coding|	protein_coding	2.06707	8.08598e-07	1.48538	0.0177896
PITRM1	ENST00000380989.6|ENSG00000107959.15|OTTHUMG00000017557.2|-|PITRM1-202|PITRM1|3487|protein_coding|	protein_coding	-0.501689	0.53037	1.57045	0.0352069
PKD1	ENST00000483814.1|ENSG00000008710.19|OTTHUMG00000155795.5|OTTHUMT00000341707.1|PKD1-217|PKD1|563|retained_intron|	retained_intron	-1.16352	0.000523276	0.97249	0.00351968
PKD1	ENST00000561991.5|ENSG00000008710.19|OTTHUMG00000155795.5|OTTHUMT00000434779.1|PKD1-224|PKD1|964|processed_transcript|	processed_transcript	0.545231	0.416019	2.46473	0.000156468
PKD1	ENST00000570193.5|ENSG00000008710.19|OTTHUMG00000155795.5|OTTHUMT00000434778.1|PKD1-239|PKD1|596|processed_transcript|	processed_transcript	-0.505407	0.424819	3.01807	1.78673e-07
PKIB	ENST00000354275.2|ENSG00000135549.14|OTTHUMG00000015488.4|OTTHUMT00000042036.1|PKIB-202|PKIB|1043|protein_coding|	protein_coding	-1.16808	5.47334e-18	-0.414874	0.0135807
PKIG	ENST00000477390.5|ENSG00000168734.13|OTTHUMG00000033065.2|OTTHUMT00000127803.1|PKIG-208|PKIG|445|processed_transcript|	processed_transcript	-0.588482	0.301077	1.66422	0.00438295
PKM	ENST00000568883.5|ENSG00000067225.17|OTTHUMG00000172709.5|-|PKM-222|PKM|1863|protein_coding|	protein_coding	0.429797	0.573183	2.28291	0.00118305
PLA2G15	ENST00000444212.2|ENSG00000103066.12|OTTHUMG00000137554.8|OTTHUMT00000433101.1|PLA2G15-203|PLA2G15|943|protein_coding|	protein_coding	-0.0246335	0.967739	1.62777	0.00107776
PLA2G4F	ENST00000569985.5|ENSG00000168907.13|OTTHUMG00000172782.3|OTTHUMT00000420466.1|PLA2G4F-207|PLA2G4F|3329|nonsense_mediated_decay|	nonsense_mediated_decay	1.83314	0.00101244	1.80763	0.0247315
PLAC9	ENST00000372267.6|ENSG00000189129.13|OTTHUMG00000018596.2|OTTHUMT00000049021.1|PLAC9-202|PLAC9|472|protein_coding|	protein_coding	-1.03014	0.0344243	1.31019	0.00269285
PLAU	ENST00000446342.5|ENSG00000122861.15|OTTHUMG00000018494.5|-|PLAU-202|PLAU|2658|protein_coding|	protein_coding	1.74634	0.0064058	2.10103	0.0105128
PLBD2	ENST00000545182.6|ENSG00000151176.7|OTTHUMG00000169567.2|OTTHUMT00000404834.1|PLBD2-202|PLBD2|2321|protein_coding|	protein_coding	0.827385	0.220951	1.87211	0.0117556
PLCD3	ENST00000546350.1|ENSG00000161714.11|OTTHUMG00000168029.6|OTTHUMT00000397586.1|PLCD3-207|PLCD3|560|retained_intron|	retained_intron	1.14425	0.01105	2.2536	2.17538e-05
PLEC	ENST00000527096.5|ENSG00000178209.14|OTTHUMG00000165291.4|OTTHUMT00000383856.2|PLEC-210|PLEC|13713|protein_coding|	protein_coding	0.0418696	0.897227	1.16482	0.000262246
PLEC	ENST00000398774.6|ENSG00000178209.14|OTTHUMG00000165291.4|OTTHUMT00000383280.1|PLEC-207|PLEC|14646|protein_coding|	protein_coding	-0.752059	0.0199696	1.33002	0.000512683
PLEKHA7	ENST00000530489.5|ENSG00000166689.15|OTTHUMG00000165954.4|OTTHUMT00000387241.2|PLEKHA7-210|PLEKHA7|3688|protein_coding|	protein_coding	0.527706	0.0892589	-1.3194	0.0207228
PLEKHB2	ENST00000628582.2|ENSG00000115762.16|OTTHUMG00000131656.9|OTTHUMT00000482350.1|PLEKHB2-211|PLEKHB2|1297|protein_coding|	protein_coding	1.96302	0.0160347	2.24682	0.0450425
PLEKHG3	ENST00000492928.1|ENSG00000126822.16|OTTHUMG00000029671.11|OTTHUMT00000073984.1|PLEKHG3-206|PLEKHG3|462|processed_transcript|	processed_transcript	-1.01637	0.0955476	-2.31737	0.020731
PLEKHG5	ENST00000377732.5|ENSG00000171680.21|OTTHUMG00000000905.4|OTTHUMT00000002633.1|PLEKHG5-204|PLEKHG5|3753|protein_coding|	protein_coding	-3.05278	0.00135101	1.54167	0.012761
PLEKHH1	ENST00000558386.5|ENSG00000054690.13|OTTHUMG00000171272.3|OTTHUMT00000416994.1|PLEKHH1-206|PLEKHH1|3383|retained_intron|	retained_intron	-0.217177	0.755535	1.38279	0.0301772
PLEKHH3	ENST00000293349.10|ENSG00000068137.14|OTTHUMG00000180641.2|OTTHUMT00000452335.1|PLEKHH3-201|PLEKHH3|2987|protein_coding|	protein_coding	-0.0282344	0.976685	2.65217	0.000615755
PLIN3	ENST00000585479.5|ENSG00000105355.8|OTTHUMG00000180249.2|OTTHUMT00000450439.1|PLIN3-202|PLIN3|1535|protein_coding|	protein_coding	1.14029	0.0527904	1.87105	0.0151484
PLIN3	ENST00000589034.5|ENSG00000105355.8|OTTHUMG00000180249.2|OTTHUMT00000450440.2|PLIN3-204|PLIN3|574|protein_coding|	protein_coding	0.406954	0.555847	1.92586	0.0260176
PLK1	ENST00000567897.6|ENSG00000166851.14|OTTHUMG00000096984.5|OTTHUMT00000434882.2|PLK1-207|PLK1|711|protein_coding|	protein_coding	1.6526	0.00131496	-1.87245	0.0358287
PLP1	ENST00000485688.5|ENSG00000123560.13|OTTHUMG00000022111.5|OTTHUMT00000268215.1|PLP1-214|PLP1|566|processed_transcript|	processed_transcript	-0.220391	0.774498	2.19032	0.00750344
PLPP5	ENST00000530193.5|ENSG00000147535.16|OTTHUMG00000165104.4|OTTHUMT00000381873.1|PLPP5-210|PLPP5|496|processed_transcript|	processed_transcript	-0.920622	0.00232477	-1.11025	0.0195528
PLRG1	ENST00000506627.5|ENSG00000171566.11|OTTHUMG00000161411.3|OTTHUMT00000364836.1|PLRG1-207|PLRG1|998|nonsense_mediated_decay|	nonsense_mediated_decay	0.839718	0.232366	2.76327	3.45085e-05
PLSCR1	ENST00000494568.5|ENSG00000188313.12|OTTHUMG00000159427.4|OTTHUMT00000355346.1|PLSCR1-219|PLSCR1|817|retained_intron|	retained_intron	3.43735	3.5206e-12	1.691	0.03226
PLXNB1	ENST00000465117.5|ENSG00000164050.12|OTTHUMG00000133527.5|OTTHUMT00000344544.1|PLXNB1-208|PLXNB1|627|processed_transcript|	processed_transcript	-0.118303	0.738636	-1.44665	0.0177194
PLXNB1	ENST00000467913.1|ENSG00000164050.12|OTTHUMG00000133527.5|OTTHUMT00000344545.1|PLXNB1-210|PLXNB1|688|retained_intron|	retained_intron	0.366985	0.465306	1.23842	0.0236756
PLXND1	ENST00000504767.5|ENSG00000004399.12|OTTHUMG00000159547.15|OTTHUMT00000356308.1|PLXND1-206|PLXND1|654|retained_intron|	retained_intron	-0.14016	0.698719	-1.70415	0.00734683
PLXND1	ENST00000511018.1|ENSG00000004399.12|OTTHUMG00000159547.15|OTTHUMT00000356307.1|PLXND1-213|PLXND1|601|retained_intron|	retained_intron	0.439818	0.253973	1.28107	0.00613604
PMEL	ENST00000549564.1|ENSG00000185664.14|OTTHUMG00000170573.5|OTTHUMT00000409629.2|PMEL-213|PMEL|503|processed_transcript|	processed_transcript	1.49784	1.69655e-05	1.04091	0.0496376
PMEPA1	ENST00000395814.5|ENSG00000124225.15|OTTHUMG00000032831.3|OTTHUMT00000267814.1|PMEPA1-204|PMEPA1|800|protein_coding|	protein_coding	1.34826	0.0923103	3.3705	9.64833e-05
PML	ENST00000354026.10|ENSG00000140464.19|OTTHUMG00000137607.5|OTTHUMT00000269040.1|PML-203|PML|2885|protein_coding|	protein_coding	1.57674	1.23431e-05	1.29369	0.015166
PML	ENST00000569477.5|ENSG00000140464.19|OTTHUMG00000137607.5|OTTHUMT00000421817.1|PML-220|PML|2251|protein_coding|	protein_coding	0.875594	0.00288072	1.06618	0.00906839
PMP22	ENST00000395936.5|ENSG00000109099.13|OTTHUMG00000058960.5|OTTHUMT00000130380.1|PMP22-202|PMP22|816|protein_coding|	protein_coding	-0.71056	0.0925361	1.1372	0.0130142
PMPCA	ENST00000619192.4|ENSG00000165688.11|OTTHUMG00000020926.4|OTTHUMT00000477904.1|PMPCA-209|PMPCA|416|retained_intron|	retained_intron	-0.162079	0.677413	-2.74692	0.00171506
PMS2P3	ENST00000430602.5|ENSG00000127957.17|OTTHUMG00000156049.45|OTTHUMT00000342941.1|PMS2P3-204|PMS2P3|1005|processed_transcript|	processed_transcript	-0.33391	0.601476	-1.84769	0.0422709
PNKP	ENST00000627232.2|ENSG00000039650.11|OTTHUMG00000183261.10|OTTHUMT00000481432.1|PNKP-220|PNKP|1530|nonsense_mediated_decay|	nonsense_mediated_decay	0.440418	0.608608	1.91428	0.0243661
PNPLA6	ENST00000594864.1|ENSG00000032444.15|OTTHUMG00000182094.2|OTTHUMT00000459294.1|PNPLA6-209|PNPLA6|565|processed_transcript|	processed_transcript	0.614173	0.345739	2.30209	0.00186968
PNPLA7	ENST00000277531.8|ENSG00000130653.15|OTTHUMG00000020990.10|OTTHUMT00000254787.2|PNPLA7-201|PNPLA7|4581|protein_coding|	protein_coding	-2.69688	0.000441934	1.51151	0.00531719
PNRC2	ENST00000374468.1|ENSG00000189266.11|OTTHUMG00000013891.4|OTTHUMT00000038947.1|PNRC2-202|PNRC2|814|protein_coding|	protein_coding	1.02072	0.00593969	1.11736	0.0383347
PODN	ENST00000395871.6|ENSG00000174348.13|OTTHUMG00000008934.2|-|PODN-203|PODN|2744|protein_coding|	protein_coding	-1.03588	0.0397909	1.51783	0.00230347
POGZ	ENST00000491586.5|ENSG00000143442.21|OTTHUMG00000012499.9|OTTHUMT00000105375.3|POGZ-213|POGZ|4130|protein_coding|	protein_coding	0.729641	0.31294	1.8469	0.0312523
POLD1	ENST00000593407.5|ENSG00000062822.12|OTTHUMG00000183037.3|OTTHUMT00000464738.2|POLD1-202|POLD1|867|protein_coding|	protein_coding	0.135369	0.850138	1.65121	0.00996023
POLDIP2	ENST00000618887.2|ENSG00000004142.11|OTTHUMG00000132065.8|OTTHUMT00000477023.2|POLDIP2-202|POLDIP2|1524|protein_coding|	protein_coding	1.11888	7.13633e-16	-1.0413	6.32829e-06
POLDIP3	ENST00000348657.6|ENSG00000100227.17|OTTHUMG00000150887.3|OTTHUMT00000320434.1|POLDIP3-203|POLDIP3|3323|protein_coding|	protein_coding	1.29618	0.0600811	1.96239	0.0319479
POLG	ENST00000637238.1|ENSG00000140521.12|OTTHUMG00000149646.8|OTTHUMT00000490650.1|POLG-221|POLG|3022|nonsense_mediated_decay|	nonsense_mediated_decay	1.09903	0.0165857	1.31239	0.0384687
POLR2B	ENST00000484821.1|ENSG00000047315.15|OTTHUMG00000128771.8|OTTHUMT00000326514.1|POLR2B-209|POLR2B|446|retained_intron|	retained_intron	-0.228369	0.174799	-1.08853	9.88941e-06
POLR2C	ENST00000564651.5|ENSG00000102978.12|OTTHUMG00000133464.3|OTTHUMT00000432726.1|POLR2C-207|POLR2C|720|processed_transcript|	processed_transcript	0.563676	0.232961	1.39562	0.016263
POLR2E	ENST00000586746.5|ENSG00000099817.11|OTTHUMG00000181873.5|OTTHUMT00000458043.2|POLR2E-204|POLR2E|1096|protein_coding|	protein_coding	0.982742	0.219821	2.86243	0.000283004
POLR2F	ENST00000405557.5|ENSG00000100142.14|OTTHUMG00000151160.4|OTTHUMT00000321579.1|POLR2F-202|POLR2F|560|protein_coding|	protein_coding	1.96358	0.000124767	2.16855	0.00141799
POLR2I	ENST00000221859.8|ENSG00000105258.8|OTTHUMG00000181749.1|OTTHUMT00000457442.1|POLR2I-201|POLR2I|913|protein_coding|	protein_coding	1.21013	3.33846e-05	0.920822	0.0381696
POLR3E	ENST00000359210.8|ENSG00000058600.15|OTTHUMG00000094779.3|OTTHUMT00000430068.1|POLR3E-202|POLR3E|2469|protein_coding|	protein_coding	0.914437	0.00389241	1.00995	0.0274573
POMT1	ENST00000467848.1|ENSG00000130714.15|OTTHUMG00000020826.2|OTTHUMT00000054749.1|POMT1-213|POMT1|461|processed_transcript|	processed_transcript	-0.746165	0.125729	1.35287	0.00450305
POU2F1	ENST00000420254.7|ENSG00000143190.21|OTTHUMG00000034436.9|OTTHUMT00000416075.2|POU2F1-205|POU2F1|1896|protein_coding|	protein_coding	-0.458285	0.4292	1.63266	0.00275833
POU3F3	ENST00000361360.3|ENSG00000198914.3|OTTHUMG00000153067.3|OTTHUMT00000329335.3|POU3F3-201|POU3F3|3064|protein_coding|	protein_coding	-1.2388	1.46772e-15	0.431478	0.00831042
PPA2	ENST00000509031.5|ENSG00000138777.19|OTTHUMG00000128781.11|OTTHUMT00000361234.1|PPA2-216|PPA2|1177|nonsense_mediated_decay|	nonsense_mediated_decay	0.0702688	0.89549	-1.81694	0.0307189
PPA2	ENST00000432483.6|ENSG00000138777.19|OTTHUMG00000128781.11|OTTHUMT00000361233.1|PPA2-205|PPA2|859|protein_coding|	protein_coding	0.71627	0.302818	2.15783	0.00559866
PPFIA1	ENST00000638133.1|ENSG00000131626.16|OTTHUMG00000167266.4|OTTHUMT00000489173.1|PPFIA1-225|PPFIA1|814|protein_coding|	protein_coding	0.27498	0.628483	1.6258	0.0226074
PPFIA3	ENST00000602848.5|ENSG00000177380.13|OTTHUMG00000183213.2|OTTHUMT00000465696.1|PPFIA3-211|PPFIA3|1638|protein_coding|	protein_coding	-0.475677	0.479673	-2.10206	0.0318066
PPFIBP1	ENST00000540503.1|ENSG00000110841.13|OTTHUMG00000169207.3|OTTHUMT00000402885.1|PPFIBP1-212|PPFIBP1|566|retained_intron|	retained_intron	-0.516186	0.397885	1.64499	0.00895393
PPFIBP2	ENST00000530181.5|ENSG00000166387.11|OTTHUMG00000165617.8|OTTHUMT00000385403.2|PPFIBP2-216|PPFIBP2|2965|protein_coding|	protein_coding	-0.146252	0.877524	2.08394	0.0211032
PPIF	ENST00000448165.1|ENSG00000108179.13|OTTHUMG00000018562.4|OTTHUMT00000048952.3|PPIF-202|PPIF|821|protein_coding|	protein_coding	2.16205	1.07321e-24	0.813245	0.00397391
PPIG	ENST00000409714.7|ENSG00000138398.15|OTTHUMG00000132206.5|OTTHUMT00000333285.1|PPIG-202|PPIG|2615|protein_coding|	protein_coding	2.36788	3.15528e-05	1.8363	0.0292911
PPIP5K1	ENST00000381885.5|ENSG00000168781.21|OTTHUMG00000059758.18|OTTHUMT00000133114.1|PPIP5K1-206|PPIP5K1|5596|protein_coding|	protein_coding	0.754736	0.0616292	1.29351	0.0157998
PPIP5K1	ENST00000348806.10|ENSG00000168781.21|OTTHUMG00000059758.18|-|PPIP5K1-202|PPIP5K1|5433|protein_coding|	protein_coding	-0.794702	0.25978	-2.66251	0.0401562
PPP1CB	ENST00000441461.5|ENSG00000213639.9|OTTHUMG00000152011.5|OTTHUMT00000324845.4|PPP1CB-207|PPP1CB|584|protein_coding|	protein_coding	1.7511	0.0486643	2.60233	0.0231087
PPP1R13B	ENST00000555734.5|ENSG00000088808.16|OTTHUMG00000171647.2|OTTHUMT00000414604.2|PPP1R13B-209|PPP1R13B|504|protein_coding|	protein_coding	-0.100367	0.775942	-1.20059	0.0298028
PPP1R13B	ENST00000556334.5|ENSG00000088808.16|OTTHUMG00000171647.2|OTTHUMT00000414596.1|PPP1R13B-213|PPP1R13B|970|retained_intron|	retained_intron	-1.12974	0.116788	1.71486	0.00661613
PPP1R13B	ENST00000555391.5|ENSG00000088808.16|OTTHUMG00000171647.2|OTTHUMT00000414595.1|PPP1R13B-207|PPP1R13B|2509|processed_transcript|	processed_transcript	2.13635	0.0052983	2.11345	0.0477256
PPP1R1B	ENST00000580825.5|ENSG00000131771.13|OTTHUMG00000133210.7|OTTHUMT00000444941.1|PPP1R1B-208|PPP1R1B|1038|protein_coding|	protein_coding	-2.07509	4.22833e-05	1.14118	0.042227
PPP1R7	ENST00000415769.1|ENSG00000115685.14|OTTHUMG00000133390.9|OTTHUMT00000323692.1|PPP1R7-208|PPP1R7|514|protein_coding|	protein_coding	0.118367	0.812095	1.09435	0.0286583
PPP2R1B	ENST00000393055.6|ENSG00000137713.15|OTTHUMG00000166741.3|OTTHUMT00000391301.1|PPP2R1B-203|PPP2R1B|1525|protein_coding|	protein_coding	0.176285	0.809199	-2.5611	0.0101886
PPP2R2A	ENST00000518215.5|ENSG00000221914.9|OTTHUMG00000163850.13|OTTHUMT00000376463.2|PPP2R2A-205|PPP2R2A|1163|retained_intron|	retained_intron	0.924482	0.0952733	1.69984	0.032424
PPP2R2C	ENST00000382599.8|ENSG00000074211.13|OTTHUMG00000090445.6|OTTHUMT00000206889.2|PPP2R2C-203|PPP2R2C|1807|protein_coding|	protein_coding	1.30561	9.49751e-18	0.521984	0.0169947
PPP2R5C	ENST00000334743.9|ENSG00000078304.19|OTTHUMG00000171597.8|OTTHUMT00000414373.2|PPP2R5C-202|PPP2R5C|4328|protein_coding|	protein_coding	0.0968728	0.880747	1.68612	0.00661613
PPP3CA	ENST00000529324.5|ENSG00000138814.16|OTTHUMG00000133839.7|OTTHUMT00000388904.2|PPP3CA-209|PPP3CA|579|protein_coding|	protein_coding	0.872753	0.0790388	-2.79515	0.0298911
PPP3R1	ENST00000409752.5|ENSG00000221823.10|OTTHUMG00000129561.8|OTTHUMT00000326786.1|PPP3R1-203|PPP3R1|851|protein_coding|	protein_coding	-0.0370151	0.942014	-2.11609	0.00729684
PPP4C	ENST00000564966.5|ENSG00000149923.13|OTTHUMG00000132113.4|OTTHUMT00000435389.1|PPP4C-208|PPP4C|1122|retained_intron|	retained_intron	0.677001	0.323668	1.76149	0.0196476
PPP6R3	ENST00000525152.1|ENSG00000110075.14|OTTHUMG00000167596.6|OTTHUMT00000395297.1|PPP6R3-208|PPP6R3|582|retained_intron|	retained_intron	-0.32365	0.486748	1.31572	0.0021403
PPT1	ENST00000642050.1|ENSG00000131238.17|OTTHUMG00000004495.8|OTTHUMT00000013126.4|PPT1-219|PPT1|4010|protein_coding|	protein_coding	-0.443285	0.213399	1.01022	0.0137303
PPT1	ENST00000529905.5|ENSG00000131238.17|OTTHUMG00000004495.8|OTTHUMT00000386256.1|PPT1-208|PPT1|1836|nonsense_mediated_decay|	nonsense_mediated_decay	1.8763	0.0300207	2.81064	0.00970867
PQBP1	ENST00000477997.5|ENSG00000102103.15|OTTHUMG00000024128.5|OTTHUMT00000060781.1|PQBP1-216|PQBP1|938|processed_transcript|	processed_transcript	-0.597622	0.500655	2.82615	6.48699e-05
PQLC2	ENST00000375153.7|ENSG00000040487.12|OTTHUMG00000002521.7|OTTHUMT00000007255.1|PQLC2-201|PQLC2|2153|protein_coding|	protein_coding	0.674252	0.0779269	1.01617	0.0451822
PQLC2	ENST00000497827.1|ENSG00000040487.12|OTTHUMG00000002521.7|OTTHUMT00000289784.2|PQLC2-206|PQLC2|1428|nonsense_mediated_decay|	nonsense_mediated_decay	0.518952	0.280678	1.23544	0.0430521
PRC1	ENST00000555455.5|ENSG00000198901.13|OTTHUMG00000171685.7|OTTHUMT00000414761.2|PRC1-206|PRC1|830|protein_coding|	protein_coding	0.686885	0.080727	1.11118	0.0389113
PRDM10	ENST00000533431.1|ENSG00000170325.14|OTTHUMG00000165762.2|OTTHUMT00000386080.2|PRDM10-209|PRDM10|2643|protein_coding|	protein_coding	0.0342765	0.968598	1.66727	0.0385697
PRDX1	ENST00000262746.5|ENSG00000117450.13|OTTHUMG00000007738.6|-|PRDX1-201|PRDX1|1234|protein_coding|	protein_coding	0.726447	0.115313	1.22436	0.0452952
PRICKLE1	ENST00000639958.1|ENSG00000139174.11|OTTHUMG00000169443.4|OTTHUMT00000491577.1|PRICKLE1-214|PRICKLE1|3803|protein_coding|	protein_coding	2.03788	0.00543801	2.16757	0.0380109
PRICKLE3	ENST00000453382.5|ENSG00000012211.12|OTTHUMG00000024134.10|OTTHUMT00000060809.2|PRICKLE3-204|PRICKLE3|1937|protein_coding|	protein_coding	1.12948	0.203592	2.71039	0.00348155
PRKD3	ENST00000452104.5|ENSG00000115825.9|OTTHUMG00000100961.5|OTTHUMT00000326527.2|PRKD3-205|PRKD3|555|protein_coding|	protein_coding	-0.292311	0.585342	1.19183	0.0205358
PRKDC	ENST00000521331.5|ENSG00000253729.7|OTTHUMG00000164239.6|OTTHUMT00000377898.2|PRKDC-204|PRKDC|1087|retained_intron|	retained_intron	-0.425889	0.403196	1.27506	0.0235327
PRKDC	ENST00000432581.2|ENSG00000253729.7|OTTHUMG00000164239.6|OTTHUMT00000397417.1|PRKDC-203|PRKDC|583|retained_intron|	retained_intron	0.13858	0.742137	1.42775	0.000734214
PRKRA	ENST00000487082.5|ENSG00000180228.12|OTTHUMG00000132576.26|OTTHUMT00000335166.2|PRKRA-211|PRKRA|1211|protein_coding|	protein_coding	-0.490614	0.288185	-2.64279	0.0168248
PRMT5	ENST00000397440.8|ENSG00000100462.15|OTTHUMG00000028709.10|OTTHUMT00000071676.4|PRMT5-203|PRMT5|1907|protein_coding|	protein_coding	-0.823246	0.13141	1.59106	0.0358798
PRPF31	ENST00000391755.1|ENSG00000105618.13|OTTHUMG00000066040.13|OTTHUMT00000141419.1|PRPF31-202|PRPF31|1767|protein_coding|	protein_coding	0.536022	0.358661	2.40228	5.18681e-05
PRPS1	ENST00000372418.2|ENSG00000147224.10|OTTHUMG00000022167.1|OTTHUMT00000057842.1|PRPS1-201|PRPS1|942|protein_coding|	protein_coding	0.216183	0.775851	2.31801	0.00217673
PRPSAP2	ENST00000414602.5|ENSG00000141127.14|OTTHUMG00000059406.7|OTTHUMT00000132111.2|PRPSAP2-204|PRPSAP2|787|protein_coding|	protein_coding	0.279289	0.692284	-2.31843	0.022488
PRPSAP2	ENST00000542013.5|ENSG00000141127.14|OTTHUMG00000059406.7|OTTHUMT00000441108.2|PRPSAP2-217|PRPSAP2|1047|protein_coding|	protein_coding	-0.162691	0.849446	1.83471	0.0136796
PRR26	ENST00000381489.6|ENSG00000180525.11|OTTHUMG00000017529.4|OTTHUMT00000046385.3|PRR26-201|PRR26|7250|protein_coding|	protein_coding	-1.04577	1.44958e-09	0.413878	0.0241524
PRR4	ENST00000539179.5|ENSG00000111215.11|OTTHUMG00000168522.5|OTTHUMT00000400054.1|PRR4-204|PRR4|500|retained_intron|	retained_intron	0.00415296	0.996881	3.06277	3.79264e-05
PRR5	ENST00000617066.4|ENSG00000186654.20|OTTHUMG00000150460.5|-|PRR5-217|PRR5|1726|protein_coding|	protein_coding	-0.583923	0.541161	3.10534	1.26961e-05
PRRC1	ENST00000513427.1|ENSG00000164244.20|OTTHUMG00000128982.5|OTTHUMT00000371489.1|PRRC1-206|PRRC1|837|processed_transcript|	processed_transcript	1.18021	1.0218e-05	0.836185	0.0431484
PRRC2B	ENST00000422467.1|ENSG00000130723.18|OTTHUMG00000020827.3|OTTHUMT00000054753.2|PRRC2B-204|PRRC2B|535|protein_coding|	protein_coding	0.812469	0.147035	1.47208	0.0413668
PSEN2	ENST00000626989.2|ENSG00000143801.16|OTTHUMG00000037563.6|-|PSEN2-211|PSEN2|1972|protein_coding|	protein_coding	0.0337348	0.950399	1.11347	0.0450467
PSIP1	ENST00000380733.8|ENSG00000164985.14|OTTHUMG00000021021.2|OTTHUMT00000055445.1|PSIP1-203|PSIP1|3391|protein_coding|	protein_coding	0.136475	0.906938	2.83023	0.00727065
PSKH1	ENST00000570631.5|ENSG00000159792.9|OTTHUMG00000137548.7|OTTHUMT00000437178.3|PSKH1-202|PSKH1|1509|protein_coding|	protein_coding	0.315731	0.473791	1.19627	0.00991412
PSMA3	ENST00000555743.1|ENSG00000100567.12|OTTHUMG00000140319.7|OTTHUMT00000411884.1|PSMA3-208|PSMA3|640|retained_intron|	retained_intron	0.930428	0.147654	2.09052	0.00577546
PSMA6	ENST00000622405.4|ENSG00000100902.10|OTTHUMG00000140221.3|-|PSMA6-215|PSMA6|978|protein_coding|	protein_coding	1.74967	0.00722056	2.8233	0.000283731
PSMA7	ENST00000484488.5|ENSG00000101182.14|OTTHUMG00000032895.4|OTTHUMT00000079978.2|PSMA7-205|PSMA7|1023|processed_transcript|	processed_transcript	1.19117	0.00180178	1.62757	0.000921865
PSMB10	ENST00000358514.8|ENSG00000205220.11|OTTHUMG00000137553.4|OTTHUMT00000268887.1|PSMB10-201|PSMB10|1218|protein_coding|	protein_coding	1.03868	7.41359e-14	0.460101	0.0260176
PSMB10	ENST00000570304.1|ENSG00000205220.11|OTTHUMG00000137553.4|OTTHUMT00000437669.1|PSMB10-202|PSMB10|851|retained_intron|	retained_intron	1.98886	2.879e-09	1.25574	0.00942587
PSMC2	ENST00000457587.5|ENSG00000161057.11|OTTHUMG00000157206.2|OTTHUMT00000347924.2|PSMC2-204|PSMC2|682|protein_coding|	protein_coding	-0.751397	0.177839	-1.68694	0.0452688
PSMC3IP	ENST00000586337.5|ENSG00000131470.14|OTTHUMG00000180247.2|OTTHUMT00000450533.1|PSMC3IP-203|PSMC3IP|747|nonsense_mediated_decay|	nonsense_mediated_decay	1.24388	0.00842612	1.87849	0.000972491
PSMC4	ENST00000596386.1|ENSG00000013275.7|OTTHUMG00000182577.2|OTTHUMT00000462923.1|PSMC4-204|PSMC4|929|retained_intron|	retained_intron	2.24818	0.0233416	3.87315	0.000884872
PSMC5	ENST00000582130.5|ENSG00000087191.12|OTTHUMG00000179013.3|OTTHUMT00000444407.2|PSMC5-213|PSMC5|828|protein_coding|	protein_coding	0.749323	0.168251	2.39307	4.02733e-05
PSMD13	ENST00000352303.9|ENSG00000185627.17|OTTHUMG00000119072.4|OTTHUMT00000385670.1|PSMD13-201|PSMD13|1427|protein_coding|	protein_coding	-0.292059	0.727688	2.98674	8.16288e-06
PSMD13	ENST00000532025.1|ENSG00000185627.17|OTTHUMG00000119072.4|OTTHUMT00000385673.1|PSMD13-211|PSMD13|653|processed_transcript|	processed_transcript	-0.902462	0.213023	3.96932	9.61737e-12
PSMD2	ENST00000473991.1|ENSG00000175166.16|OTTHUMG00000156796.4|OTTHUMT00000345861.1|PSMD2-212|PSMD2|590|processed_transcript|	processed_transcript	-0.0759411	0.889863	-2.14218	0.016067
PSMD5	ENST00000625444.1|ENSG00000095261.13|OTTHUMG00000020573.4|-|PSMD5-208|PSMD5|219|protein_coding|	protein_coding	0.548871	0.335207	2.54668	1.9895e-05
PSMD8	ENST00000620216.4|ENSG00000099341.11|OTTHUMG00000150691.5|-|PSMD8-210|PSMD8|1538|protein_coding|	protein_coding	0.64917	0.0803417	1.57146	0.000403052
PSMD9	ENST00000538613.5|ENSG00000110801.13|OTTHUMG00000168945.4|OTTHUMT00000401690.2|PSMD9-205|PSMD9|534|protein_coding|	protein_coding	0.855388	0.0888744	1.7049	0.00601597
PSME1	ENST00000559741.5|ENSG00000092010.14|OTTHUMG00000028795.3|OTTHUMT00000416164.1|PSME1-206|PSME1|763|retained_intron|	retained_intron	-0.440272	0.484859	-2.90462	0.000961428
PSME1	ENST00000561435.5|ENSG00000092010.14|OTTHUMG00000028795.3|OTTHUMT00000416163.1|PSME1-210|PSME1|945|protein_coding|	protein_coding	0.464707	0.105862	-1.14618	0.0313615
PSME1	ENST00000561142.5|ENSG00000092010.14|OTTHUMG00000028795.3|OTTHUMT00000416161.1|PSME1-209|PSME1|865|retained_intron|	retained_intron	0.54742	0.377619	1.78054	0.029265
PTBP1	ENST00000587191.3|ENSG00000011304.19|OTTHUMG00000181789.12|OTTHUMT00000474697.1|PTBP1-213|PTBP1|357|protein_coding|	protein_coding	0.924718	0.00666351	1.39246	0.00174711
PTBP1	ENST00000627714.2|ENSG00000011304.19|OTTHUMG00000181789.12|-|PTBP1-220|PTBP1|2201|protein_coding|	protein_coding	-0.0555371	0.84949	-1.89521	9.22249e-06
PTCD3	ENST00000483925.1|ENSG00000132300.18|OTTHUMG00000153168.5|OTTHUMT00000329860.3|PTCD3-214|PTCD3|576|retained_intron|	retained_intron	1.70452	0.0007173	-2.27655	0.0278261
PTDSS1	ENST00000522072.1|ENSG00000156471.12|OTTHUMG00000164687.2|OTTHUMT00000379747.1|PTDSS1-206|PTDSS1|1112|protein_coding|	protein_coding	-0.267157	0.657839	1.48961	0.0156986
PTK2	ENST00000521986.5|ENSG00000169398.19|OTTHUMG00000067438.25|OTTHUMT00000378067.1|PTK2-238|PTK2|2393|protein_coding|	protein_coding	-2.15503	0.00872279	2.0267	0.00324257
PTOV1	ENST00000594165.5|ENSG00000104960.15|OTTHUMG00000183162.3|OTTHUMT00000465343.2|PTOV1-203|PTOV1|986|processed_transcript|	processed_transcript	0.324731	0.800615	4.55171	1.656e-06
PTP4A2	ENST00000470404.5|ENSG00000184007.18|OTTHUMG00000003801.11|OTTHUMT00000091372.2|PTP4A2-203|PTP4A2|575|protein_coding|	protein_coding	0.549183	0.00551657	-1.40938	6.67054e-05
PTP4A2	ENST00000529477.5|ENSG00000184007.18|OTTHUMG00000003801.11|OTTHUMT00000393011.1|PTP4A2-212|PTP4A2|568|processed_transcript|	processed_transcript	0.876871	0.0678463	1.94951	0.000265719
PTPN12	ENST00000418110.5|ENSG00000127947.15|OTTHUMG00000023501.9|OTTHUMT00000341581.2|PTPN12-204|PTPN12|564|protein_coding|	protein_coding	1.8808	0.000665459	-2.86393	0.0219471
PTPN7	ENST00000367279.8|ENSG00000143851.15|OTTHUMG00000035931.7|OTTHUMT00000087514.1|PTPN7-202|PTPN7|3265|protein_coding|	protein_coding	1.11287	0.0577505	2.04007	0.00380549
PTPN9	ENST00000568108.1|ENSG00000169410.9|OTTHUMG00000142838.3|OTTHUMT00000420321.1|PTPN9-205|PTPN9|561|retained_intron|	retained_intron	-0.344613	0.549927	1.70486	0.0010171
PTPRF	ENST00000437607.1|ENSG00000142949.16|OTTHUMG00000007501.5|OTTHUMT00000309061.2|PTPRF-208|PTPRF|788|protein_coding|	protein_coding	-0.27579	0.610098	-2.07427	0.0457094
PTPRF	ENST00000429895.5|ENSG00000142949.16|OTTHUMG00000007501.5|OTTHUMT00000309063.1|PTPRF-206|PTPRF|6312|protein_coding|	protein_coding	-0.813411	0.640048	3.04837	0.02738
PTPRU	ENST00000493601.5|ENSG00000060656.19|OTTHUMG00000003699.7|OTTHUMT00000010787.1|PTPRU-208|PTPRU|695|processed_transcript|	processed_transcript	-1.55311	7.955e-07	0.764557	0.014129
PTTG1IP	ENST00000445724.3|ENSG00000183255.11|OTTHUMG00000090254.1|-|PTTG1IP-204|PTTG1IP|2497|protein_coding|	protein_coding	-0.171118	0.767468	1.11518	0.0487841
PUM1	ENST00000530669.1|ENSG00000134644.15|OTTHUMG00000003795.5|OTTHUMT00000393201.1|PUM1-221|PUM1|582|nonsense_mediated_decay|	nonsense_mediated_decay	-0.879409	0.0168392	1.18164	0.00283153
PWP1	ENST00000552760.5|ENSG00000136045.11|OTTHUMG00000169913.2|OTTHUMT00000406541.1|PWP1-205|PWP1|851|nonsense_mediated_decay|	nonsense_mediated_decay	2.96559	5.10798e-06	2.69612	0.00180516
PXK	ENST00000468776.5|ENSG00000168297.15|OTTHUMG00000159149.4|OTTHUMT00000353506.1|PXK-207|PXK|1653|nonsense_mediated_decay|	nonsense_mediated_decay	0.408543	0.644506	2.80664	0.000314749
PXN	ENST00000637617.1|ENSG00000089159.16|OTTHUMG00000169169.9|OTTHUMT00000489566.1|PXN-221|PXN|3246|protein_coding|	protein_coding	0.733434	0.399137	3.75237	3.42069e-07
PXN-AS1	ENST00000620336.1|ENSG00000255857.5|OTTHUMG00000169166.1|OTTHUMT00000474622.1|PXN-AS1-206|PXN-AS1|443|antisense_RNA|	antisense_RNA	-0.701013	0.167392	2.84209	1.73371e-09
PYCARD	ENST00000350605.4|ENSG00000103490.13|OTTHUMG00000176753.30|OTTHUMT00000255540.2|PYCARD-202|PYCARD|696|protein_coding|	protein_coding	1.24272	4.46723e-26	0.341272	0.0342263
PYCR1	ENST00000405481.8|ENSG00000183010.16|OTTHUMG00000178436.2|OTTHUMT00000441961.2|PYCR1-205|PYCR1|841|protein_coding|	protein_coding	0.915001	0.0900293	1.68388	0.0293838
PYCR2	ENST00000489681.5|ENSG00000143811.18|OTTHUMG00000037506.5|OTTHUMT00000091319.3|PYCR2-207|PYCR2|597|protein_coding|	protein_coding	-0.487976	0.564055	1.88893	0.0231688
PYDC1	ENST00000568383.5|ENSG00000169900.7|OTTHUMG00000132407.2|OTTHUMT00000433568.1|PYDC1-202|PYDC1|244|processed_transcript|	processed_transcript	0.661109	0.0922407	-1.75087	0.0381732
PYDC1	ENST00000302964.3|ENSG00000169900.7|OTTHUMG00000132407.2|OTTHUMT00000255543.2|PYDC1-201|PYDC1|813|protein_coding|	protein_coding	1.19237	4.45044e-10	0.919179	0.00046732
PYGB	ENST00000428458.1|ENSG00000100994.11|OTTHUMG00000032117.3|OTTHUMT00000078416.3|PYGB-202|PYGB|734|protein_coding|	protein_coding	-1.98212	0.000661361	1.7932	3.16376e-05
PYGO1	ENST00000563719.3|ENSG00000171016.11|OTTHUMG00000132009.3|OTTHUMT00000419656.1|PYGO1-202|PYGO1|2653|protein_coding|	protein_coding	0.981071	1.20625e-05	-1.02518	0.0361084
QARS	ENST00000494767.2|ENSG00000172053.17|OTTHUMG00000156774.12|OTTHUMT00000488300.1|QARS-221|QARS|1023|nonsense_mediated_decay|	nonsense_mediated_decay	0.639869	0.325805	-4.1665	0.0418906
QARS	ENST00000306125.11|ENSG00000172053.17|OTTHUMG00000156774.12|OTTHUMT00000345689.4|QARS-201|QARS|2827|protein_coding|	protein_coding	0.97552	0.309172	3.22005	0.000339249
QARS	ENST00000634609.1|ENSG00000172053.17|OTTHUMG00000156774.12|OTTHUMT00000488320.1|QARS-232|QARS|553|retained_intron|	retained_intron	1.45783	0.125576	3.29904	0.00189844
QDPR	ENST00000508623.5|ENSG00000151552.11|OTTHUMG00000128537.3|OTTHUMT00000359709.1|QDPR-206|QDPR|601|protein_coding|	protein_coding	0.871577	0.197395	2.25859	0.00135103
QDPR	ENST00000281243.9|ENSG00000151552.11|OTTHUMG00000128537.3|OTTHUMT00000250372.1|QDPR-201|QDPR|1648|protein_coding|	protein_coding	0.145884	0.8829	2.39713	0.00282488
QRICH2	ENST00000636395.1|ENSG00000129646.14|OTTHUMG00000167578.3|OTTHUMT00000395140.2|QRICH2-205|QRICH2|5677|protein_coding|	protein_coding	-1.03827	0.0913078	1.57011	0.0243661
R3HCC1	ENST00000519952.5|ENSG00000104679.10|OTTHUMG00000163786.3|OTTHUMT00000375468.3|R3HCC1-205|R3HCC1|985|protein_coding|	protein_coding	0.0470974	0.949238	2.00255	0.00124061
RAB25	ENST00000497968.1|ENSG00000132698.14|OTTHUMG00000017457.2|OTTHUMT00000046188.1|RAB25-205|RAB25|539|processed_transcript|	processed_transcript	0.0960798	0.846019	1.4137	0.00196722
RAB28	ENST00000630951.1|ENSG00000157869.14|OTTHUMG00000090543.2|-|RAB28-208|RAB28|1679|protein_coding|	protein_coding	-0.488965	0.424085	-2.22118	0.00916939
RAB34	ENST00000395245.8|ENSG00000109113.19|OTTHUMG00000132680.13|-|RAB34-204|RAB34|1766|protein_coding|	protein_coding	1.0431	0.0713821	1.65887	0.0299771
RAB3IL1	ENST00000526200.1|ENSG00000167994.11|OTTHUMG00000167524.2|OTTHUMT00000394919.1|RAB3IL1-203|RAB3IL1|636|protein_coding|	protein_coding	-0.787001	0.211989	1.39329	0.0468825
RAB40B	ENST00000538809.6|ENSG00000141542.10|OTTHUMG00000177806.1|OTTHUMT00000439014.1|RAB40B-202|RAB40B|704|protein_coding|	protein_coding	0.109208	0.850985	1.70939	0.00126487
RAB40C	ENST00000248139.7|ENSG00000197562.9|OTTHUMG00000047854.6|OTTHUMT00000109079.4|RAB40C-201|RAB40C|2699|protein_coding|	protein_coding	0.456989	0.569239	2.27684	0.0129851
RAB40C	ENST00000563109.1|ENSG00000197562.9|OTTHUMG00000047854.6|OTTHUMT00000421757.2|RAB40C-207|RAB40C|710|protein_coding|	protein_coding	-1.04037	0.0863062	1.93472	0.000741824
RAB43	ENST00000393305.5|ENSG00000172780.16|OTTHUMG00000137364.3|OTTHUMT00000267852.1|RAB43-203|RAB43|4215|protein_coding|	protein_coding	0.369824	0.727836	2.47554	0.0117595
RAB43	ENST00000393308.5|ENSG00000172780.16|OTTHUMG00000137364.3|OTTHUMT00000267851.1|RAB43-205|RAB43|4193|protein_coding|	protein_coding	0.35763	0.676604	1.89597	0.0395348
RAB4B-EGLN2	ENST00000596216.1|ENSG00000171570.10|OTTHUMG00000182702.3|OTTHUMT00000463213.2|RAB4B-EGLN2-202|RAB4B-EGLN2|624|retained_intron|	retained_intron	-0.231969	0.723481	2.07095	0.00512074
RAB5B	ENST00000549505.5|ENSG00000111540.15|OTTHUMG00000169682.3|OTTHUMT00000405397.1|RAB5B-206|RAB5B|3148|nonsense_mediated_decay|	nonsense_mediated_decay	-0.153095	0.530307	-2.69304	2.64529e-10
RAB5B	ENST00000628569.1|ENSG00000111540.15|OTTHUMG00000169682.3|-|RAB5B-211|RAB5B|496|protein_coding|	protein_coding	1.15104	0.251903	5.43548	2.3717e-10
RAB5C	ENST00000393860.7|ENSG00000108774.14|OTTHUMG00000169703.3|-|RAB5C-202|RAB5C|1912|protein_coding|	protein_coding	0.142054	0.801814	1.38634	0.0112469
RAB7A	ENST00000464496.5|ENSG00000075785.12|OTTHUMG00000159812.2|OTTHUMT00000357484.2|RAB7A-202|RAB7A|576|protein_coding|	protein_coding	3.12247	5.16229e-05	3.52837	0.000236644
RAB7A	ENST00000485280.1|ENSG00000075785.12|OTTHUMG00000159812.2|OTTHUMT00000357490.1|RAB7A-205|RAB7A|507|protein_coding|	protein_coding	0.700256	0.0116758	-2.22019	0.000103903
RAB7A	ENST00000483906.5|ENSG00000075785.12|OTTHUMG00000159812.2|OTTHUMT00000357489.1|RAB7A-204|RAB7A|533|protein_coding|	protein_coding	-0.166261	0.762059	1.62427	0.0018451
RABGEF1	ENST00000437078.6|ENSG00000284461.1|OTTHUMG00000192208.3|-|RABGEF1-210|RABGEF1|4319|protein_coding|	protein_coding	-1.69471	0.0275726	2.83018	0.000604531
RABL6	ENST00000357466.6|ENSG00000196642.18|OTTHUMG00000020947.12|OTTHUMT00000055137.3|RABL6-202|RABL6|1820|protein_coding|	protein_coding	1.18109	0.141404	3.11689	0.00044032
RACGAP1	ENST00000551016.5|ENSG00000161800.12|OTTHUMG00000169811.6|OTTHUMT00000406000.1|RACGAP1-221|RACGAP1|2193|protein_coding|	protein_coding	0.366689	0.731129	2.40727	0.0119869
RACK1	ENST00000504726.1|ENSG00000204628.11|OTTHUMG00000163380.14|OTTHUMT00000373431.1|RACK1-211|RACK1|388|protein_coding|	protein_coding	0.346548	0.554823	1.60595	0.0069644
RACK1	ENST00000511566.5|ENSG00000204628.11|OTTHUMG00000163380.14|OTTHUMT00000373357.1|RACK1-225|RACK1|825|protein_coding|	protein_coding	0.0776223	0.89693	1.77992	0.00112951
RACK1	ENST00000513027.3|ENSG00000204628.11|OTTHUMG00000163380.14|OTTHUMT00000373302.2|RACK1-229|RACK1|697|protein_coding|	protein_coding	-0.419357	0.453534	2.63214	1.73371e-09
RACK1	ENST00000509535.5|ENSG00000204628.11|OTTHUMG00000163380.14|OTTHUMT00000373354.1|RACK1-222|RACK1|456|protein_coding|	protein_coding	-0.446371	0.476509	2.26709	5.59268e-05
RAD23A	ENST00000586534.5|ENSG00000179262.9|OTTHUMG00000180723.2|OTTHUMT00000452752.1|RAD23A-203|RAD23A|1746|protein_coding|	protein_coding	-1.48708	0.00878859	1.42665	0.0130126
RAF1	ENST00000442415.6|ENSG00000132155.11|OTTHUMG00000129789.7|OTTHUMT00000339671.1|RAF1-205|RAF1|3085|protein_coding|	protein_coding	1.24238	0.319675	4.06012	0.000266956
RAI14	ENST00000512625.5|ENSG00000039560.13|OTTHUMG00000162019.3|OTTHUMT00000366801.2|RAI14-219|RAI14|554|protein_coding|	protein_coding	-1.29234	0.0812592	2.2758	0.000546444
RALB	ENST00000447591.5|ENSG00000144118.13|OTTHUMG00000131435.21|OTTHUMT00000332362.2|RALB-205|RALB|558|protein_coding|	protein_coding	1.14977	0.0776487	2.75283	0.000109015
RALGDS	ENST00000424572.1|ENSG00000160271.14|OTTHUMG00000020858.3|OTTHUMT00000054846.2|RALGDS-206|RALGDS|926|protein_coding|	protein_coding	0.149176	0.889441	3.07383	0.000136524
RANBP1	ENST00000411892.5|ENSG00000099901.16|OTTHUMG00000150490.33|OTTHUMT00000319935.2|RANBP1-203|RANBP1|584|protein_coding|	protein_coding	0.90106	0.215391	2.56785	0.00110212
RANBP3	ENST00000591092.5|ENSG00000031823.14|OTTHUMG00000180636.6|OTTHUMT00000452307.1|RANBP3-220|RANBP3|1783|protein_coding|	protein_coding	0.436991	0.213929	-1.53044	0.0177952
RANBP3	ENST00000587479.2|ENSG00000031823.14|OTTHUMG00000180636.6|OTTHUMT00000452924.2|RANBP3-211|RANBP3|547|protein_coding|	protein_coding	0.28301	0.548697	1.75295	0.000272656
RANGAP1	ENST00000446258.5|ENSG00000100401.19|OTTHUMG00000150940.12|OTTHUMT00000320609.10|RANGAP1-205|RANGAP1|759|protein_coding|	protein_coding	2.58106	1.29937e-05	2.03033	0.0156992
RAP1B	ENST00000535492.5|ENSG00000127314.17|OTTHUMG00000133660.7|OTTHUMT00000403010.2|RAP1B-215|RAP1B|509|protein_coding|	protein_coding	0.0373118	0.962015	2.06732	0.0012201
RAP1B	ENST00000543393.5|ENSG00000127314.17|OTTHUMG00000133660.7|OTTHUMT00000402798.2|RAP1B-229|RAP1B|874|protein_coding|	protein_coding	0.00415155	0.996132	-4.00378	0.0203204
RAP2A	ENST00000476869.1|ENSG00000125249.6|OTTHUMG00000017240.6|OTTHUMT00000045529.3|RAP2A-202|RAP2A|903|nonsense_mediated_decay|	nonsense_mediated_decay	1.19046	0.000401515	1.05913	0.0356113
RARA	ENST00000394089.6|ENSG00000131759.17|OTTHUMG00000133328.4|OTTHUMT00000257137.2|RARA-204|RARA|2024|protein_coding|	protein_coding	1.22506	0.107106	2.22669	0.0124171
RARA	ENST00000420042.1|ENSG00000131759.17|OTTHUMG00000133328.4|OTTHUMT00000257141.2|RARA-205|RARA|1052|processed_transcript|	processed_transcript	-0.996216	0.073413	1.12966	0.0368512
RARG	ENST00000338561.9|ENSG00000172819.16|OTTHUMG00000048077.4|OTTHUMT00000405604.1|RARG-201|RARG|1836|protein_coding|	protein_coding	2.32143	0.000123295	2.04327	0.0160278
RASGEF1B	ENST00000335927.11|ENSG00000138670.17|OTTHUMG00000160890.6|OTTHUMT00000362834.1|RASGEF1B-202|RASGEF1B|1756|protein_coding|	protein_coding	0.977831	0.215614	1.83157	0.0492576
RASGEF1C	ENST00000361132.8|ENSG00000146090.15|OTTHUMG00000130914.7|OTTHUMT00000253526.4|RASGEF1C-201|RASGEF1C|2243|protein_coding|	protein_coding	-1.09783	0.0390534	1.2669	0.0179128
RASSF3	ENST00000336061.2|ENSG00000153179.12|OTTHUMG00000168812.2|-|RASSF3-202|RASSF3|1030|protein_coding|	protein_coding	0.860235	0.0803349	1.48022	0.0401562
RBBP4	ENST00000525506.1|ENSG00000162521.18|OTTHUMG00000007998.13|OTTHUMT00000389774.1|RBBP4-216|RBBP4|501|retained_intron|	retained_intron	0.684411	0.375617	1.8115	0.0340042
RBCK1	ENST00000382214.7|ENSG00000125826.20|OTTHUMG00000031634.7|OTTHUMT00000077456.3|RBCK1-204|RBCK1|2752|nonsense_mediated_decay|	nonsense_mediated_decay	0.903669	0.211082	2.22242	0.0113652
RBM23	ENST00000555714.5|ENSG00000100461.17|OTTHUMG00000171467.9|OTTHUMT00000413576.1|RBM23-218|RBM23|561|processed_transcript|	processed_transcript	0.848274	0.181207	1.84274	0.0113002
RBM3	ENST00000489344.5|ENSG00000102317.17|OTTHUMG00000024121.2|OTTHUMT00000060753.1|RBM3-208|RBM3|724|processed_transcript|	processed_transcript	0.127731	0.334124	-1.14666	1.2398e-09
RBM34	ENST00000468751.5|ENSG00000188739.14|OTTHUMG00000039620.9|OTTHUMT00000095559.1|RBM34-204|RBM34|648|retained_intron|	retained_intron	2.50332	3.13345e-07	1.71271	0.0310607
RBM39	ENST00000461849.1|ENSG00000131051.22|OTTHUMG00000032358.19|OTTHUMT00000127143.1|RBM39-222|RBM39|861|retained_intron|	retained_intron	-0.849801	0.124885	-1.9912	0.02041
RBM4	ENST00000532968.1|ENSG00000173933.19|OTTHUMG00000154171.6|OTTHUMT00000393839.1|RBM4-212|RBM4|757|protein_coding|	protein_coding	0.545552	0.394925	1.46435	0.0395903
RBM42	ENST00000589871.1|ENSG00000126254.11|OTTHUMG00000182063.2|OTTHUMT00000459063.1|RBM42-205|RBM42|1487|protein_coding|	protein_coding	-0.82844	0.37287	3.17375	4.47512e-06
RBM7	ENST00000544582.1|ENSG00000076053.10|OTTHUMG00000168270.1|OTTHUMT00000399015.1|RBM7-207|RBM7|692|protein_coding|	protein_coding	-0.107774	0.780045	-1.6538	0.00820595
RBMX	ENST00000419968.6|ENSG00000147274.14|OTTHUMG00000022517.2|OTTHUMT00000420446.1|RBMX-202|RBMX|940|protein_coding|	protein_coding	0.691116	0.236519	1.4803	0.0466598
RBPJ	ENST00000504423.1|ENSG00000168214.20|OTTHUMG00000097793.10|OTTHUMT00000360178.2|RBPJ-207|RBPJ|405|protein_coding|	protein_coding	-0.783402	0.117972	1.11982	0.0281764
RBPMS	ENST00000287771.9|ENSG00000157110.15|OTTHUMG00000163845.7|OTTHUMT00000376358.1|RBPMS-201|RBPMS|2974|protein_coding|	protein_coding	-1.56953	0.0126109	1.20117	0.0343094
RCHY1	ENST00000513083.5|ENSG00000163743.13|OTTHUMG00000130105.3|OTTHUMT00000362010.1|RCHY1-209|RCHY1|540|retained_intron|	retained_intron	0.85635	0.1681	1.93106	0.0157877
RELA	ENST00000532999.5|ENSG00000173039.18|OTTHUMG00000166566.7|OTTHUMT00000390461.3|RELA-220|RELA|1341|protein_coding|	protein_coding	2.07866	0.0195356	3.19867	0.00178023
RELA	ENST00000525658.5|ENSG00000173039.18|OTTHUMG00000166566.7|OTTHUMT00000390463.2|RELA-204|RELA|808|nonsense_mediated_decay|	nonsense_mediated_decay	1.69848	0.032272	2.2073	0.0389929
RELL1	ENST00000314117.8|ENSG00000181826.9|OTTHUMG00000160389.5|OTTHUMT00000360428.2|RELL1-201|RELL1|1326|protein_coding|	protein_coding	0.077035	0.891402	1.14123	0.0329688
RENBP	ENST00000423624.5|ENSG00000102032.12|OTTHUMG00000024224.9|OTTHUMT00000316203.2|RENBP-203|RENBP|1304|nonsense_mediated_decay|	nonsense_mediated_decay	0.64324	0.38867	2.52379	0.0044591
REPS1	ENST00000258062.9|ENSG00000135597.18|OTTHUMG00000015685.6|OTTHUMT00000042449.3|REPS1-201|REPS1|3161|protein_coding|	protein_coding	1.39467	0.0266983	2.04916	0.012804
RER1	ENST00000378513.7|ENSG00000157916.19|OTTHUMG00000001403.5|-|RER1-203|RER1|3000|protein_coding|	protein_coding	1.69426	0.0150287	2.70787	0.00141127
RERE	ENST00000467350.1|ENSG00000142599.17|OTTHUMG00000001765.7|OTTHUMT00000083598.1|RERE-209|RERE|410|processed_transcript|	processed_transcript	-0.977946	0.0310837	1.64163	2.64398e-05
RETREG2	ENST00000452022.1|ENSG00000144567.10|OTTHUMG00000154577.4|OTTHUMT00000336155.2|RETREG2-206|RETREG2|729|protein_coding|	protein_coding	-0.59196	0.342644	-2.07129	0.0318379
REXO2	ENST00000539275.5|ENSG00000076043.9|OTTHUMG00000168271.2|OTTHUMT00000399092.1|REXO2-206|REXO2|710|protein_coding|	protein_coding	-0.0929967	0.846282	-2.28264	0.00486411
RFC4	ENST00000418288.5|ENSG00000163918.10|OTTHUMG00000156515.8|OTTHUMT00000344479.2|RFC4-205|RFC4|701|protein_coding|	protein_coding	0.538049	0.00266199	-1.1036	0.00225119
RFESD	ENST00000511684.5|ENSG00000175449.13|OTTHUMG00000121168.5|OTTHUMT00000369952.2|RFESD-207|RFESD|615|protein_coding|	protein_coding	-1.11142	7.10845e-11	-0.425774	0.0474703
RFXANK	ENST00000303088.8|ENSG00000064490.13|OTTHUMG00000169224.7|OTTHUMT00000402923.2|RFXANK-201|RFXANK|1407|protein_coding|	protein_coding	-1.1063	0.181928	2.42193	0.00143023
RGL2	ENST00000483151.5|ENSG00000237441.9|OTTHUMG00000031072.4|OTTHUMT00000076099.2|RGL2-243|RGL2|2772|retained_intron|	retained_intron	-0.230099	0.626199	-1.65287	0.0316622
RGMA	ENST00000557420.1|ENSG00000182175.13|OTTHUMG00000171781.6|OTTHUMT00000415096.2|RGMA-211|RGMA|989|protein_coding|	protein_coding	-1.99432	6.7698e-06	1.06582	0.0120813
RGPD5	ENST00000016946.7|ENSG00000015568.12|OTTHUMG00000130985.17|OTTHUMT00000253599.3|RGPD5-201|RGPD5|7253|protein_coding|	protein_coding	-1.01428	0.19047	1.7936	0.0212603
RGS13	ENST00000543215.5|ENSG00000127074.14|OTTHUMG00000035601.1|-|RGS13-204|RGS13|1518|protein_coding|	protein_coding	-1.17789	0.0690361	-2.08161	0.0420718
RGS13	ENST00000462955.1|ENSG00000127074.14|OTTHUMG00000035601.1|OTTHUMT00000086401.1|RGS13-202|RGS13|1465|processed_transcript|	processed_transcript	-0.25173	0.739918	1.73944	0.0203388
RGS14	ENST00000506944.1|ENSG00000169220.17|OTTHUMG00000163324.1|OTTHUMT00000372688.1|RGS14-207|RGS14|590|processed_transcript|	processed_transcript	3.47442	6.33151e-11	-2.64215	0.0222842
RGS14	ENST00000514102.5|ENSG00000169220.17|OTTHUMG00000163324.1|OTTHUMT00000372685.1|RGS14-212|RGS14|875|retained_intron|	retained_intron	1.00447	2.13585e-06	0.65026	0.0495974
RGS5	ENST00000525894.5|ENSG00000143248.12|OTTHUMG00000034441.5|OTTHUMT00000388638.2|RGS5-205|RGS5|541|retained_intron|	retained_intron	-0.348031	0.668698	2.54249	5.534e-05
RHNO1	ENST00000538636.5|ENSG00000171792.10|OTTHUMG00000158557.3|OTTHUMT00000398458.2|RHNO1-207|RHNO1|583|protein_coding|	protein_coding	0.974465	0.0716253	1.53894	0.0212519
RHOBTB3	ENST00000502541.1|ENSG00000164292.12|OTTHUMG00000121171.3|OTTHUMT00000370260.1|RHOBTB3-202|RHOBTB3|693|nonsense_mediated_decay|	nonsense_mediated_decay	-1.2846	0.00461189	-1.59253	0.0288195
RHOBTB3	ENST00000503737.1|ENSG00000164292.12|OTTHUMG00000121171.3|OTTHUMT00000370255.1|RHOBTB3-203|RHOBTB3|653|protein_coding|	protein_coding	-1.06034	0.0261142	1.06088	0.0303836
RHOC	ENST00000436685.6|ENSG00000155366.16|OTTHUMG00000011905.6|OTTHUMT00000033242.2|RHOC-211|RHOC|517|protein_coding|	protein_coding	-0.993126	0.0825212	1.24617	0.0470356
RHOF	ENST00000541657.5|ENSG00000139725.7|OTTHUMG00000169077.5|OTTHUMT00000402170.3|RHOF-205|RHOF|1626|protein_coding|	protein_coding	-1.23144	0.00743346	-1.79199	0.0139773
RHOH	ENST00000613272.4|ENSG00000168421.12|OTTHUMG00000099373.5|-|RHOH-218|RHOH|1865|protein_coding|	protein_coding	0.798563	0.20942	1.62192	0.0445671
RHOT2	ENST00000568950.5|ENSG00000140983.13|OTTHUMG00000121139.6|OTTHUMT00000421276.1|RHOT2-219|RHOT2|1343|retained_intron|	retained_intron	1.04512	0.12402	1.82043	0.0351225
RHPN2	ENST00000588388.5|ENSG00000131941.7|OTTHUMG00000180340.2|OTTHUMT00000450829.1|RHPN2-204|RHPN2|2378|nonsense_mediated_decay|	nonsense_mediated_decay	0.058602	0.948659	2.03539	0.0137943
RIC8A	ENST00000524854.5|ENSG00000177963.14|OTTHUMG00000119069.7|OTTHUMT00000385454.1|RIC8A-202|RIC8A|649|protein_coding|	protein_coding	0.0542625	0.87801	1.22932	0.000295998
RIC8A	ENST00000527039.1|ENSG00000177963.14|OTTHUMG00000119069.7|OTTHUMT00000385361.1|RIC8A-206|RIC8A|675|retained_intron|	retained_intron	1.00771	0.192838	2.34032	0.00451739
RIN3	ENST00000555589.5|ENSG00000100599.15|OTTHUMG00000171198.1|OTTHUMT00000412271.1|RIN3-206|RIN3|2814|nonsense_mediated_decay|	nonsense_mediated_decay	1.32928	0.0349458	1.71551	0.0431944
RMDN3	ENST00000560905.1|ENSG00000137824.15|OTTHUMG00000130066.3|OTTHUMT00000418968.2|RMDN3-211|RMDN3|1008|protein_coding|	protein_coding	-0.748878	0.124877	1.12524	0.0178499
RMRP	ENST00000363046.1|ENSG00000277027.1|-|-|RMRP-202|RMRP|264|ribozyme|	ribozyme	1.57015	0.052398	3.07196	0.00110214
RNA5-8SN1	ENST00000610460.1|ENSG00000277739.1|-|-|RNA5-8SN1-201|RNA5-8SN1|153|rRNA|	rRNA	0.354961	0.49237	1.45014	0.019393
RNA5-8SN4	ENST00000613359.1|ENSG00000275215.1|-|-|RNA5-8SN4-201|RNA5-8SN4|153|rRNA|	rRNA	0.354961	0.49237	1.45014	0.019393
RNA5-8SN5	ENST00000612463.1|ENSG00000278233.1|-|-|RNA5-8SN5-202|RNA5-8SN5|153|rRNA|	rRNA	0.354961	0.49237	1.45014	0.019393
RNA5-8SN5	ENST00000619471.1|ENSG00000278189.1|-|-|RNA5-8SN5-201|RNA5-8SN5|153|rRNA|	rRNA	0.354961	0.49237	1.45014	0.019393
RNASE4	ENST00000555597.1|ENSG00000258818.3|OTTHUMG00000029575.4|OTTHUMT00000411228.2|RNASE4-202|RNASE4|1341|protein_coding|	protein_coding	-1.49826	0.036736	1.70244	0.0147081
RNASEH2C	ENST00000531596.5|ENSG00000172922.8|OTTHUMG00000166601.2|OTTHUMT00000390696.1|RNASEH2C-205|RNASEH2C|968|nonsense_mediated_decay|	nonsense_mediated_decay	0.21872	0.701178	1.72715	0.00110214
RNASET2	ENST00000508775.5|ENSG00000026297.15|OTTHUMG00000016009.8|OTTHUMT00000043089.2|RNASET2-210|RNASET2|1375|protein_coding|	protein_coding	0.235608	0.717293	1.53387	0.0299263
RNF10	ENST00000543757.5|ENSG00000022840.15|OTTHUMG00000168999.16|OTTHUMT00000401967.1|RNF10-220|RNF10|315|processed_transcript|	processed_transcript	0.304773	0.455092	-1.73247	0.0483016
RNF10	ENST00000537740.1|ENSG00000022840.15|OTTHUMG00000168999.16|OTTHUMT00000401962.2|RNF10-209|RNF10|412|protein_coding|	protein_coding	0.115839	0.89455	1.9672	0.00959562
RNF126	ENST00000590885.6|ENSG00000070423.17|OTTHUMG00000180592.9|OTTHUMT00000452108.5|RNF126-204|RNF126|1436|processed_transcript|	processed_transcript	0.615976	0.110598	-2.85107	0.00116093
RNF126	ENST00000292363.9|ENSG00000070423.17|OTTHUMG00000180592.9|OTTHUMT00000452104.6|RNF126-201|RNF126|1694|protein_coding|	protein_coding	1.36209	0.0401339	3.14656	1.71474e-05
RNF14	ENST00000347642.7|ENSG00000013561.17|OTTHUMG00000129660.7|-|RNF14-201|RNF14|4213|protein_coding|	protein_coding	-0.526849	0.444438	2.32405	0.00143023
RNF14	ENST00000515613.5|ENSG00000013561.17|OTTHUMG00000129660.7|OTTHUMT00000370670.1|RNF14-216|RNF14|753|nonsense_mediated_decay|	nonsense_mediated_decay	0.81016	0.15029	1.74803	0.0242389
RNF166	ENST00000567844.1|ENSG00000158717.10|OTTHUMG00000137863.7|OTTHUMT00000423211.1|RNF166-209|RNF166|633|protein_coding|	protein_coding	0.842878	0.140705	2.14451	0.00110212
RNF167	ENST00000576965.1|ENSG00000108523.15|OTTHUMG00000099397.5|OTTHUMT00000438738.2|RNF167-216|RNF167|599|protein_coding|	protein_coding	-0.694438	0.119909	-1.69313	0.0271742
RNF185	ENST00000518626.5|ENSG00000138942.15|OTTHUMG00000151253.3|OTTHUMT00000380432.1|RNF185-207|RNF185|2737|nonsense_mediated_decay|	nonsense_mediated_decay	0.381391	0.693374	2.65193	0.00376127
RNF213	ENST00000570776.1|ENSG00000173821.19|OTTHUMG00000161415.8|OTTHUMT00000437952.1|RNF213-212|RNF213|544|retained_intron|	retained_intron	0.256403	0.635107	1.25652	0.0302964
RNF220	ENST00000335497.11|ENSG00000187147.17|OTTHUMG00000007697.7|OTTHUMT00000021584.2|RNF220-201|RNF220|1203|protein_coding|	protein_coding	0.409277	0.62263	4.7675	1.87981e-12
RNF220	ENST00000440132.2|ENSG00000187147.17|OTTHUMG00000007697.7|OTTHUMT00000021583.1|RNF220-205|RNF220|1200|protein_coding|	protein_coding	-0.0906798	0.849634	-3.83835	0.00115379
RNF220	ENST00000475378.5|ENSG00000187147.17|OTTHUMG00000007697.7|OTTHUMT00000021585.1|RNF220-212|RNF220|916|processed_transcript|	processed_transcript	-0.186092	0.265672	1.16803	5.78327e-11
RNF38	ENST00000491349.5|ENSG00000137075.17|OTTHUMG00000019905.4|OTTHUMT00000052426.2|RNF38-209|RNF38|959|processed_transcript|	processed_transcript	0.686701	0.387873	2.60209	0.00119285
RNF5	ENST00000487940.1|ENSG00000204308.7|OTTHUMG00000031093.2|OTTHUMT00000268943.1|RNF5-204|RNF5|357|processed_transcript|	processed_transcript	-0.408606	0.603347	3.79796	1.89066e-09
RNH1	ENST00000529368.5|ENSG00000023191.16|OTTHUMG00000119086.9|OTTHUMT00000384378.2|RNH1-216|RNH1|727|protein_coding|	protein_coding	0.542957	0.0832911	1.15843	0.00298613
RNH1	ENST00000531223.1|ENSG00000023191.16|OTTHUMG00000119086.9|OTTHUMT00000384382.1|RNH1-219|RNH1|572|retained_intron|	retained_intron	-0.530966	0.31278	1.5179	0.0306968
RNH1	ENST00000524464.5|ENSG00000023191.16|OTTHUMG00000119086.9|OTTHUMT00000384376.1|RNH1-207|RNH1|624|nonsense_mediated_decay|	nonsense_mediated_decay	-0.0667245	0.953893	1.93657	0.0481888
RNPC3	ENST00000527062.5|ENSG00000185946.15|OTTHUMG00000166613.2|OTTHUMT00000390813.1|RNPC3-205|RNPC3|768|protein_coding|	protein_coding	0.217043	0.686596	-2.23261	0.00512074
ROBO1	ENST00000498428.5|ENSG00000169855.19|OTTHUMG00000158843.4|OTTHUMT00000352612.1|ROBO1-211|ROBO1|3566|retained_intron|	retained_intron	1.4962	0.0999444	3.06939	0.00346998
ROGDI	ENST00000587843.5|ENSG00000067836.12|OTTHUMG00000129479.9|OTTHUMT00000434563.2|ROGDI-209|ROGDI|1362|nonsense_mediated_decay|	nonsense_mediated_decay	0.0415221	0.941267	1.2001	0.034387
ROMO1	ENST00000397416.1|ENSG00000125995.15|OTTHUMG00000032360.4|OTTHUMT00000316945.1|ROMO1-205|ROMO1|288|protein_coding|	protein_coding	0.209178	0.805166	2.54844	0.00113281
RPL11	ENST00000467075.1|ENSG00000142676.12|OTTHUMG00000002926.2|OTTHUMT00000008169.1|RPL11-204|RPL11|377|processed_transcript|	processed_transcript	-0.258722	0.539858	1.63496	1.89537e-05
RPL15	ENST00000307839.9|ENSG00000174748.18|OTTHUMG00000130485.5|OTTHUMT00000252885.3|RPL15-201|RPL15|2730|protein_coding|	protein_coding	0.398167	0.142887	1.28716	5.98756e-05
RPL17	ENST00000579248.5|ENSG00000265681.7|OTTHUMG00000179680.6|OTTHUMT00000448308.1|RPL17-204|RPL17|790|protein_coding|	protein_coding	1.11257	1.87084e-11	0.728968	0.00168423
RPL19	ENST00000579374.5|ENSG00000108298.9|OTTHUMG00000178979.6|OTTHUMT00000444201.1|RPL19-205|RPL19|690|protein_coding|	protein_coding	-0.777219	0.528089	3.02801	0.00441908
RPL21	ENST00000311549.10|ENSG00000122026.10|OTTHUMG00000016630.6|OTTHUMT00000044270.1|RPL21-202|RPL21|815|protein_coding|	protein_coding	-0.139888	0.582229	1.23945	3.6022e-06
RPL21	ENST00000483765.5|ENSG00000122026.10|OTTHUMG00000016630.6|OTTHUMT00000044277.5|RPL21-208|RPL21|453|nonsense_mediated_decay|	nonsense_mediated_decay	-1.3996	3.0177e-19	0.660167	8.27338e-06
RPL26L1	ENST00000519156.1|ENSG00000037241.7|OTTHUMG00000130517.5|OTTHUMT00000372561.2|RPL26L1-202|RPL26L1|493|protein_coding|	protein_coding	1.6103	0.00870825	2.00671	0.0142451
RPL28	ENST00000558752.1|ENSG00000108107.14|OTTHUMG00000171991.4|OTTHUMT00000416298.1|RPL28-206|RPL28|671|protein_coding|	protein_coding	0.208311	0.611738	1.93804	5.02994e-08
RPL29	ENST00000475248.5|ENSG00000162244.10|OTTHUMG00000155262.4|OTTHUMT00000349683.1|RPL29-203|RPL29|551|protein_coding|	protein_coding	-0.0943871	0.930673	2.14956	0.032967
RPL31	ENST00000409650.5|ENSG00000071082.10|OTTHUMG00000130687.7|OTTHUMT00000329107.1|RPL31-206|RPL31|770|protein_coding|	protein_coding	-0.794816	0.0789332	-1.91712	0.0173331
RPL37	ENST00000507642.5|ENSG00000145592.13|OTTHUMG00000094774.5|OTTHUMT00000367561.1|RPL37-203|RPL37|425|processed_transcript|	processed_transcript	-0.0818469	0.812377	1.9187	3.01209e-10
RPL38	ENST00000529123.2|ENSG00000172809.12|OTTHUMG00000166016.2|OTTHUMT00000387452.2|RPL38-204|RPL38|576|retained_intron|	retained_intron	0.316626	0.515928	-2.03618	0.00577959
RPL4	ENST00000569696.5|ENSG00000174444.14|OTTHUMG00000133193.4|OTTHUMT00000420739.2|RPL4-217|RPL4|569|protein_coding|	protein_coding	-0.332187	0.435787	1.09345	0.034432
RPL41	ENST00000546485.5|ENSG00000229117.8|OTTHUMG00000170183.1|OTTHUMT00000407821.1|RPL41-203|RPL41|335|processed_transcript|	processed_transcript	-0.066102	0.831638	-1.85232	3.30821e-05
RPL41	ENST00000546654.1|ENSG00000229117.8|OTTHUMG00000170183.1|OTTHUMT00000407823.1|RPL41-205|RPL41|238|processed_transcript|	processed_transcript	0.0706403	0.924095	1.70566	0.0234669
RPL6	ENST00000424576.6|ENSG00000089009.15|OTTHUMG00000169685.4|OTTHUMT00000405422.1|RPL6-202|RPL6|1074|protein_coding|	protein_coding	1.68642	8.14295e-35	0.362907	0.0412396
RPL8	ENST00000532702.1|ENSG00000161016.17|OTTHUMG00000165249.3|OTTHUMT00000382954.1|RPL8-212|RPL8|745|protein_coding|	protein_coding	0.204858	0.642214	2.28242	1.07507e-07
RPL8	ENST00000262584.7|ENSG00000161016.17|OTTHUMG00000165249.3|OTTHUMT00000382948.1|RPL8-201|RPL8|1041|protein_coding|	protein_coding	0.0385848	0.92025	1.57581	7.15558e-06
RPLP0	ENST00000546989.5|ENSG00000089157.15|OTTHUMG00000169317.9|OTTHUMT00000403464.2|RPLP0-205|RPLP0|993|protein_coding|	protein_coding	0.635119	0.0325044	1.15568	0.00348155
RPN2	ENST00000462163.1|ENSG00000118705.16|OTTHUMG00000032409.5|OTTHUMT00000079080.4|RPN2-207|RPN2|712|nonsense_mediated_decay|	nonsense_mediated_decay	1.51951	0.0115373	1.95881	0.0160148
RPP38	ENST00000378203.5|ENSG00000152464.14|OTTHUMG00000017728.3|OTTHUMT00000046978.1|RPP38-204|RPP38|1296|protein_coding|	protein_coding	-0.17695	0.607799	-1.27628	0.0149744
RPP38	ENST00000378201.6|ENSG00000152464.14|OTTHUMG00000017728.3|OTTHUMT00000046979.2|RPP38-202|RPP38|833|protein_coding|	protein_coding	-0.271398	0.699611	2.03519	0.00694865
RPPH1	ENST00000516869.1|ENSG00000277209.1|-|-|RPPH1-201|RPPH1|333|ribozyme|	ribozyme	0.358498	0.376886	1.23474	0.00970095
RPRD1B	ENST00000462548.6|ENSG00000101413.11|OTTHUMG00000032434.6|OTTHUMT00000276744.2|RPRD1B-203|RPRD1B|2436|nonsense_mediated_decay|	nonsense_mediated_decay	0.794621	0.245546	2.44706	0.000847555
RPS11	ENST00000601306.1|ENSG00000142534.6|OTTHUMG00000183156.3|OTTHUMT00000465311.1|RPS11-208|RPS11|547|nonsense_mediated_decay|	nonsense_mediated_decay	-0.624528	0.124994	1.66551	0.00026673
RPS14	ENST00000519690.1|ENSG00000164587.11|OTTHUMG00000130080.2|OTTHUMT00000374310.1|RPS14-205|RPS14|3119|retained_intron|	retained_intron	-0.530777	0.000535642	1.12564	4.33288e-11
RPS15	ENST00000593052.5|ENSG00000115268.9|OTTHUMG00000140099.11|OTTHUMT00000449613.2|RPS15-212|RPS15|629|protein_coding|	protein_coding	-0.0473539	0.895399	1.68767	8.68022e-08
RPS2	ENST00000529806.5|ENSG00000140988.15|OTTHUMG00000128708.5|OTTHUMT00000387772.1|RPS2-209|RPS2|993|protein_coding|	protein_coding	1.04792	1.68966e-06	0.674986	0.0474695
RPS2	ENST00000526908.1|ENSG00000140988.15|OTTHUMG00000128708.5|OTTHUMT00000387776.1|RPS2-204|RPS2|638|retained_intron|	retained_intron	-0.339145	0.488121	1.1181	0.0427707
RPS21	ENST00000450116.6|ENSG00000171858.17|OTTHUMG00000032915.2|-|RPS21-204|RPS21|418|protein_coding|	protein_coding	-1.41577	0.287608	4.5278	1.66257e-05
RPS23	ENST00000510210.5|ENSG00000186468.12|OTTHUMG00000162557.2|OTTHUMT00000370358.1|RPS23-206|RPS23|1058|protein_coding|	protein_coding	-1.20024	0.0194749	1.39066	0.00164231
RPS24	ENST00000485708.6|ENSG00000138326.18|OTTHUMG00000018549.3|OTTHUMT00000048911.2|RPS24-213|RPS24|544|processed_transcript|	processed_transcript	-1.40767	2.68056e-12	-1.17105	7.65165e-06
RPS27A	ENST00000478196.6|ENSG00000143947.13|OTTHUMG00000151919.18|OTTHUMT00000324422.2|RPS27A-208|RPS27A|580|retained_intron|	retained_intron	0.11621	0.511402	-1.04187	1.43114e-05
[truncated: 682 more rows]

## Sheet: Supplementary Table 1. B
gene	transcript	transcript_type	log2fc_LvsH	FDR_LvsH	log2fc_NLvsH	FDR_NLvsH
A2ML1	ENST00000299698.11|ENSG00000166535.19|OTTHUMG00000128499.8|OTTHUMT00000250304.3|A2ML1-201|A2ML1|5274|protein_coding|	protein_coding	2.64876	2.09344e-44	-0.00988948	0.981135
A2ML1	ENST00000541459.5|ENSG00000166535.19|OTTHUMG00000128499.8|OTTHUMT00000395845.1|A2ML1-207|A2ML1|3370|protein_coding|	protein_coding	2.52498	1.21394e-28	0.445718	0.211763
A2ML1	ENST00000537475.1|ENSG00000166535.19|OTTHUMG00000128499.8|OTTHUMT00000395963.1|A2ML1-203|A2ML1|1136|nonsense_mediated_decay|	nonsense_mediated_decay	1.75826	6.03338e-20	-0.167732	0.699952
A2ML1	ENST00000539547.5|ENSG00000166535.19|OTTHUMG00000128499.8|OTTHUMT00000395846.2|A2ML1-205|A2ML1|3460|protein_coding|	protein_coding	-2.16119	0.0498355	-1.97735	0.303328
A4GALT	ENST00000381278.3|ENSG00000128274.15|OTTHUMG00000150744.2|OTTHUMT00000319916.1|A4GALT-202|A4GALT|1935|protein_coding|	protein_coding	-1.5659	0.012381	-0.398128	0.727438
AAAS	ENST00000552876.5|ENSG00000094914.12|OTTHUMG00000169729.4|OTTHUMT00000405633.1|AAAS-220|AAAS|2016|retained_intron|	retained_intron	-1.36792	0.00657	-1.35202	0.0915496
AAAS	ENST00000394384.7|ENSG00000094914.12|OTTHUMG00000169729.4|OTTHUMT00000405634.1|AAAS-202|AAAS|1703|protein_coding|	protein_coding	1.13638	0.0204116	-0.560461	0.572834
AACS	ENST00000316543.14|ENSG00000081760.16|OTTHUMG00000168550.3|OTTHUMT00000400209.2|AACS-202|AACS|3115|processed_transcript|	processed_transcript	-1.16441	1.27777e-10	0.185968	0.510058
AACS	ENST00000545511.5|ENSG00000081760.16|OTTHUMG00000168550.3|OTTHUMT00000400212.2|AACS-212|AACS|6646|retained_intron|	retained_intron	-1.1669	6.34553e-16	0.240973	0.192181
AADAC	ENST00000232892.11|ENSG00000114771.13|OTTHUMG00000159876.2|OTTHUMT00000357883.2|AADAC-201|AADAC|1642|protein_coding|	protein_coding	-1.04941	8.52457e-05	0.0487165	0.933793
AADACL3	ENST00000620146.2|ENSG00000188984.11|OTTHUMG00000001887.5|OTTHUMT00000005323.2|AADACL3-202|AADACL3|3832|processed_transcript|	processed_transcript	-6.79699	0.000226175	-0.156294	0.90934
AADACL3	ENST00000359318.7|ENSG00000188984.11|OTTHUMG00000001887.5|OTTHUMT00000005324.5|AADACL3-201|AADACL3|3662|protein_coding|	protein_coding	-6.19281	0.000704813	-0.507102	0.664398
AAK1	ENST00000623317.3|ENSG00000115977.18|OTTHUMG00000129648.9|OTTHUMT00000479114.2|AAK1-212|AAK1|1019|protein_coding|	protein_coding	1.09043	2.65894e-06	0.244241	0.636376
AAMDC	ENST00000526164.5|ENSG00000087884.14|OTTHUMG00000166651.2|OTTHUMT00000390975.1|AAMDC-205|AAMDC|726|nonsense_mediated_decay|	nonsense_mediated_decay	-1.38087	7.5313e-07	0.11801	0.792206
AAMDC	ENST00000393427.6|ENSG00000087884.14|OTTHUMG00000166651.2|OTTHUMT00000390978.1|AAMDC-202|AAMDC|531|protein_coding|	protein_coding	-1.16041	5.48935e-25	0.0918483	0.561755
AAMDC	ENST00000533193.5|ENSG00000087884.14|OTTHUMG00000166651.2|OTTHUMT00000390982.1|AAMDC-211|AAMDC|606|protein_coding|	protein_coding	-1.21087	9.96023e-10	0.0757462	0.819617
AAMDC	ENST00000526415.5|ENSG00000087884.14|OTTHUMG00000166651.2|OTTHUMT00000390976.1|AAMDC-206|AAMDC|579|protein_coding|	protein_coding	-1.21449	2.22488e-20	0.100588	0.607719
AAMP	ENST00000461911.1|ENSG00000127837.9|OTTHUMG00000155202.3|OTTHUMT00000338761.1|AAMP-206|AAMP|567|retained_intron|	retained_intron	2.17117	0.00293797	-1.17617	0.525969
AARD	ENST00000378279.3|ENSG00000205002.3|OTTHUMG00000164961.1|OTTHUMT00000381195.1|AARD-201|AARD|2299|protein_coding|	protein_coding	-1.05829	1.01131e-06	0.222816	0.520717
AASDHPPT	ENST00000524411.5|ENSG00000149313.10|OTTHUMG00000166253.2|OTTHUMT00000388733.2|AASDHPPT-202|AASDHPPT|629|protein_coding|	protein_coding	1.63545	0.000644178	-1.13434	0.324968
AASDHPPT	ENST00000525660.1|ENSG00000149313.10|OTTHUMG00000166253.2|OTTHUMT00000388735.1|AASDHPPT-203|AASDHPPT|1252|nonsense_mediated_decay|	nonsense_mediated_decay	1.25271	0.00364374	0.552829	0.5118
AASS	ENST00000393376.5|ENSG00000008311.14|OTTHUMG00000157058.1|OTTHUMT00000347300.1|AASS-202|AASS|3233|protein_coding|	protein_coding	3.3857	6.103e-06	-1.91859	0.333875
AASS	ENST00000417368.6|ENSG00000008311.14|OTTHUMG00000157058.1|OTTHUMT00000347298.1|AASS-203|AASS|3163|protein_coding|	protein_coding	2.55217	1.1152e-21	0.239272	0.685851
AASS	ENST00000431170.5|ENSG00000008311.14|OTTHUMG00000157058.1|OTTHUMT00000347302.1|AASS-205|AASS|2922|nonsense_mediated_decay|	nonsense_mediated_decay	4.04035	1.39673e-12	-0.74979	0.622502
AASS	ENST00000460376.5|ENSG00000008311.14|OTTHUMG00000157058.1|OTTHUMT00000347301.1|AASS-206|AASS|2331|retained_intron|	retained_intron	1.91733	3.93904e-23	0.135588	0.756706
AATBC	ENST00000437258.5|ENSG00000215458.8|OTTHUMG00000086882.1|OTTHUMT00000195678.1|AATBC-202|AATBC|932|antisense_RNA|	antisense_RNA	-1.14564	8.52707e-05	-0.942494	0.022124
ABCA10	ENST00000518929.5|ENSG00000154263.17|OTTHUMG00000164716.6|OTTHUMT00000379999.1|ABCA10-202|ABCA10|5375|nonsense_mediated_decay|	nonsense_mediated_decay	-1.0757	0.000760241	-0.158246	0.774353
ABCA10	ENST00000519732.5|ENSG00000154263.17|OTTHUMG00000164716.6|OTTHUMT00000379998.1|ABCA10-203|ABCA10|2183|processed_transcript|	processed_transcript	-1.0868	1.34273e-06	0.258388	0.397931
ABCA10	ENST00000269081.8|ENSG00000154263.17|OTTHUMG00000164716.6|OTTHUMT00000379881.4|ABCA10-201|ABCA10|6362|protein_coding|	protein_coding	-1.78178	0.019766	0.49487	0.636991
ABCA11P	ENST00000451020.6|ENSG00000251595.7|OTTHUMG00000159884.1|OTTHUMT00000231921.1|ABCA11P-201|ABCA11P|1815|processed_transcript|	processed_transcript	-1.19827	8.86786e-10	0.151904	0.638225
ABCA12	ENST00000389661.4|ENSG00000144452.14|OTTHUMG00000154801.3|OTTHUMT00000337109.1|ABCA12-202|ABCA12|7005|protein_coding|	protein_coding	5.6799	6.83908e-06	-0.696641	0.874085
ABCA12	ENST00000272895.11|ENSG00000144452.14|OTTHUMG00000154801.3|OTTHUMT00000337111.1|ABCA12-201|ABCA12|9100|protein_coding|	protein_coding	1.6374	3.20654e-49	-0.00884859	0.966481
ABCA13	ENST00000435803.5|ENSG00000179869.14|OTTHUMG00000155840.6|OTTHUMT00000341964.3|ABCA13-204|ABCA13|17184|protein_coding|	protein_coding	2.98589	1.27106e-11	0.790274	0.367888
ABCA13	ENST00000411975.5|ENSG00000179869.14|OTTHUMG00000155840.6|OTTHUMT00000341966.2|ABCA13-201|ABCA13|4480|protein_coding|	protein_coding	-2.1881	1.52645e-08	0.136647	0.811171
ABCA2	ENST00000490486.2|ENSG00000107331.16|OTTHUMG00000020958.5|OTTHUMT00000355955.1|ABCA2-220|ABCA2|666|protein_coding|	protein_coding	-1.54054	0.00464475	2.08714	1.36621e-06
ABCA2	ENST00000463603.5|ENSG00000107331.16|OTTHUMG00000020958.5|OTTHUMT00000055205.1|ABCA2-209|ABCA2|655|retained_intron|	retained_intron	-1.43572	0.000294576	-0.101004	0.884607
ABCA2	ENST00000464520.1|ENSG00000107331.16|OTTHUMG00000020958.5|OTTHUMT00000355956.1|ABCA2-211|ABCA2|886|retained_intron|	retained_intron	-1.52075	1.15422e-07	0.216625	0.607707
ABCA3	ENST00000301732.9|ENSG00000167972.13|OTTHUMG00000128845.2|OTTHUMT00000250784.2|ABCA3-201|ABCA3|6609|protein_coding|	protein_coding	-1.21322	3.22102e-24	0.106988	0.53561
ABCA4	ENST00000536513.5|ENSG00000198691.11|OTTHUMG00000010622.3|-|ABCA4-207|ABCA4|3740|protein_coding|	protein_coding	-1.54751	5.9994e-09	0.246304	0.535871
ABCA8	ENST00000586292.5|ENSG00000141338.13|OTTHUMG00000180192.4|OTTHUMT00000450289.1|ABCA8-207|ABCA8|875|retained_intron|	retained_intron	-1.16343	8.62962e-06	0.388569	0.287268
ABCA9	ENST00000453985.6|ENSG00000154258.16|OTTHUMG00000140371.3|OTTHUMT00000277073.2|ABCA9-202|ABCA9|6116|protein_coding|	protein_coding	-1.23667	8.2185e-12	0.0671853	0.844928
ABCB5	ENST00000404938.6|ENSG00000004846.16|OTTHUMG00000094789.7|OTTHUMT00000326736.2|ABCB5-202|ABCB5|5811|protein_coding|	protein_coding	-1.1742	0.000147671	0.177558	0.708426
ABCB6	ENST00000265316.7|ENSG00000115657.12|OTTHUMG00000133131.3|OTTHUMT00000256820.2|ABCB6-201|ABCB6|3016|protein_coding|	protein_coding	1.3937	4.39417e-17	0.353854	0.20052
ABCB8	ENST00000297504.10|ENSG00000197150.12|OTTHUMG00000158686.4|OTTHUMT00000351733.2|ABCB8-201|ABCB8|2487|protein_coding|	protein_coding	2.50974	0.00105115	0.279332	0.90783
ABCB8	ENST00000491920.1|ENSG00000197150.12|OTTHUMG00000158686.4|OTTHUMT00000351753.1|ABCB8-219|ABCB8|717|protein_coding|	protein_coding	2.23022	2.64703e-09	0.256196	0.800988
ABCB8	ENST00000477092.5|ENSG00000197150.12|OTTHUMG00000158686.4|OTTHUMT00000351740.1|ABCB8-211|ABCB8|1596|protein_coding|	protein_coding	1.02569	3.2728e-14	-0.151363	0.595311
ABCC1	ENST00000572882.2|ENSG00000103222.18|OTTHUMG00000048267.5|OTTHUMT00000436390.2|ABCC1-204|ABCC1|4565|protein_coding|	protein_coding	4.06261	0.000421384	3.46691	0.0308513
ABCC1	ENST00000572053.5|ENSG00000103222.18|OTTHUMG00000048267.5|OTTHUMT00000436394.2|ABCC1-203|ABCC1|744|nonsense_mediated_decay|	nonsense_mediated_decay	1.6433	1.30889e-06	1.462	0.00160301
ABCC1	ENST00000399410.7|ENSG00000103222.18|OTTHUMG00000048267.5|OTTHUMT00000109701.1|ABCC1-202|ABCC1|6552|protein_coding|	protein_coding	1.25119	2.45315e-53	0.0651456	0.538687
ABCC1	ENST00000574761.1|ENSG00000103222.18|OTTHUMG00000048267.5|OTTHUMT00000436395.1|ABCC1-206|ABCC1|996|retained_intron|	retained_intron	1.63512	5.64249e-07	0.0130822	0.991182
ABCC3	ENST00000513589.1|ENSG00000108846.15|OTTHUMG00000162245.5|OTTHUMT00000368091.1|ABCC3-213|ABCC3|582|processed_transcript|	processed_transcript	-2.00036	3.18237e-08	-1.11942	0.015166
ABCC3	ENST00000505699.5|ENSG00000108846.15|OTTHUMG00000162245.5|OTTHUMT00000368086.1|ABCC3-207|ABCC3|5271|nonsense_mediated_decay|	nonsense_mediated_decay	-1.23206	5.82049e-15	-0.0933522	0.737667
ABCC3	ENST00000503337.1|ENSG00000108846.15|OTTHUMG00000162245.5|OTTHUMT00000368087.1|ABCC3-205|ABCC3|2277|retained_intron|	retained_intron	-1.38468	3.89584e-10	-0.0617557	0.885109
ABCC3	ENST00000285238.12|ENSG00000108846.15|OTTHUMG00000162245.5|OTTHUMT00000368083.2|ABCC3-201|ABCC3|5716|protein_coding|	protein_coding	-1.1301	1.95891e-07	0.164492	0.661267
ABCC9	ENST00000544039.5|ENSG00000069431.11|OTTHUMG00000169094.4|OTTHUMT00000402229.2|ABCC9-205|ABCC9|3531|protein_coding|	protein_coding	-1.13924	0.00573012	0.146894	0.857014
ABCD3	ENST00000315713.5|ENSG00000117528.11|OTTHUMG00000010717.1|OTTHUMT00000029598.1|ABCD3-201|ABCD3|884|protein_coding|	protein_coding	1.42732	6.93404e-16	0.293048	0.362287
ABCD4	ENST00000553486.5|ENSG00000119688.20|OTTHUMG00000171207.1|OTTHUMT00000412326.1|ABCD4-218|ABCD4|1842|nonsense_mediated_decay|	nonsense_mediated_decay	1.31323	0.0166551	0.734496	0.476389
ABCD4	ENST00000553745.5|ENSG00000119688.20|OTTHUMG00000171207.1|OTTHUMT00000412328.1|ABCD4-219|ABCD4|1770|nonsense_mediated_decay|	nonsense_mediated_decay	1.21306	0.0366866	1.1509	0.19244
ABCF2	ENST00000441774.1|ENSG00000033050.7|OTTHUMG00000154570.4|OTTHUMT00000336089.2|ABCF2-203|ABCF2|941|protein_coding|	protein_coding	1.89868	8.21552e-08	0.202504	0.836529
ABCF2	ENST00000468073.5|ENSG00000033050.7|OTTHUMG00000154570.4|OTTHUMT00000348840.2|ABCF2-204|ABCF2|1031|protein_coding|	protein_coding	1.3295	0.000109364	0.479126	0.499124
ABCG4	ENST00000619701.4|ENSG00000172350.9|OTTHUMG00000166169.6|OTTHUMT00000388213.5|ABCG4-205|ABCG4|3852|protein_coding|	protein_coding	5.24788	1.81249e-52	-0.00386195	0.996674
ABHD10	ENST00000491580.1|ENSG00000144827.8|OTTHUMG00000159280.1|OTTHUMT00000354327.1|ABHD10-202|ABHD10|1339|nonsense_mediated_decay|	nonsense_mediated_decay	-1.1349	0.0205275	-0.257949	0.757253
ABHD12	ENST00000450393.5|ENSG00000100997.18|OTTHUMG00000032121.4|OTTHUMT00000078427.2|ABHD12-203|ABHD12|615|protein_coding|	protein_coding	-3.44937	6.18357e-09	0.117637	0.916714
ABHD12B	ENST00000555292.1|ENSG00000131969.14|OTTHUMG00000140286.4|OTTHUMT00000411034.1|ABHD12B-207|ABHD12B|588|processed_transcript|	processed_transcript	-2.27524	1.37969e-19	-0.179859	0.569707
ABHD12B	ENST00000554241.5|ENSG00000131969.14|OTTHUMG00000140286.4|OTTHUMT00000411032.1|ABHD12B-205|ABHD12B|2863|processed_transcript|	processed_transcript	-2.09486	2.2544e-23	0.0499096	0.852883
ABHD12B	ENST00000382029.7|ENSG00000131969.14|OTTHUMG00000140286.4|OTTHUMT00000411029.2|ABHD12B-203|ABHD12B|1580|nonsense_mediated_decay|	nonsense_mediated_decay	-1.60451	2.89851e-06	0.477825	0.285369
ABHD12B	ENST00000337334.6|ENSG00000131969.14|OTTHUMG00000140286.4|OTTHUMT00000411030.1|ABHD12B-201|ABHD12B|1708|protein_coding|	protein_coding	-2.23378	1.6614e-16	-0.469062	0.140693
ABHD12B	ENST00000353130.5|ENSG00000131969.14|OTTHUMG00000140286.4|OTTHUMT00000276867.1|ABHD12B-202|ABHD12B|1477|protein_coding|	protein_coding	-2.78363	1.73554e-11	-0.413098	0.364304
ABHD16A	ENST00000492084.5|ENSG00000204427.11|OTTHUMG00000031177.7|OTTHUMT00000076343.6|ABHD16A-212|ABHD16A|2260|nonsense_mediated_decay|	nonsense_mediated_decay	-1.25981	0.0129954	-0.0647432	0.945811
ABHD17C	ENST00000258884.4|ENSG00000136379.11|OTTHUMG00000172282.1|OTTHUMT00000417652.1|ABHD17C-201|ABHD17C|2368|protein_coding|	protein_coding	1.31552	1.70967e-36	0.0507758	0.795581
ABHD17C	ENST00000560609.1|ENSG00000136379.11|OTTHUMG00000172282.1|OTTHUMT00000417651.1|ABHD17C-205|ABHD17C|627|protein_coding|	protein_coding	1.2284	1.32051e-18	-0.387424	0.106169
ABHD2	ENST00000568308.1|ENSG00000140526.17|OTTHUMG00000148684.5|OTTHUMT00000421133.1|ABHD2-208|ABHD2|502|retained_intron|	retained_intron	1.67944	0.00255767	0.440925	0.743429
ABHD2	ENST00000562073.1|ENSG00000140526.17|OTTHUMG00000148684.5|OTTHUMT00000421132.2|ABHD2-202|ABHD2|588|processed_transcript|	processed_transcript	1.86825	0.000269037	0.724861	0.469614
ABHD4	ENST00000537243.5|ENSG00000100439.10|OTTHUMG00000028686.7|OTTHUMT00000401541.1|ABHD4-205|ABHD4|550|nonsense_mediated_decay|	nonsense_mediated_decay	1.44066	0.00553819	-1.60271	0.0918749
ABI1	ENST00000490841.6|ENSG00000136754.17|OTTHUMG00000017848.3|-|ABI1-212|ABI1|3188|protein_coding|	protein_coding	1.17301	0.0491572	-1.75874	0.210349
ABI1	ENST00000376139.6|ENSG00000136754.17|OTTHUMG00000017848.3|OTTHUMT00000047291.1|ABI1-205|ABI1|3516|protein_coding|	protein_coding	-1.49222	0.00211455	-0.1102	0.913626
ABI1	ENST00000376160.5|ENSG00000136754.17|OTTHUMG00000017848.3|OTTHUMT00000047286.1|ABI1-208|ABI1|3515|protein_coding|	protein_coding	-1.69545	0.0124827	-1.9808	0.0689684
ABI2	ENST00000376135.5|ENSG00000138443.15|OTTHUMG00000132879.15|OTTHUMT00000336238.1|ABI2-205|ABI2|568|processed_transcript|	processed_transcript	2.40709	8.53602e-08	-0.713714	0.493587
ABI2	ENST00000454023.1|ENSG00000138443.15|OTTHUMG00000132879.15|OTTHUMT00000336243.2|ABI2-222|ABI2|940|protein_coding|	protein_coding	1.11158	0.00206768	0.0114543	0.992605
ABI3BP	ENST00000470336.5|ENSG00000154175.16|OTTHUMG00000159094.6|OTTHUMT00000353265.1|ABI3BP-205|ABI3BP|2984|retained_intron|	retained_intron	-1.32503	3.84425e-05	-0.195779	0.748357
ABI3BP	ENST00000482765.5|ENSG00000154175.16|OTTHUMG00000159094.6|OTTHUMT00000353275.1|ABI3BP-210|ABI3BP|475|protein_coding|	protein_coding	-1.00413	0.0131224	-0.389592	0.546523
ABI3BP	ENST00000466947.5|ENSG00000154175.16|OTTHUMG00000159094.6|OTTHUMT00000353271.2|ABI3BP-203|ABI3BP|560|protein_coding|	protein_coding	-1.95145	6.6246e-08	0.349065	0.461904
ABLIM1	ENST00000369253.6|ENSG00000099204.18|OTTHUMG00000019088.7|OTTHUMT00000050478.3|ABLIM1-203|ABLIM1|2255|protein_coding|	protein_coding	2.32275	3.58039e-05	-0.00410955	0.998138
ABLIM1	ENST00000428430.1|ENSG00000099204.18|OTTHUMG00000019088.7|OTTHUMT00000050479.2|ABLIM1-208|ABLIM1|854|protein_coding|	protein_coding	1.02137	2.5421e-08	-0.0656684	0.893607
ABLIM2	ENST00000428004.6|ENSG00000163995.19|OTTHUMG00000057427.25|OTTHUMT00000358861.2|ABLIM2-205|ABLIM2|2573|protein_coding|	protein_coding	1.70437	7.71995e-12	0.966379	0.00673544
ABLIM2	ENST00000514025.5|ENSG00000163995.19|OTTHUMG00000057427.25|OTTHUMT00000127606.7|ABLIM2-213|ABLIM2|2974|protein_coding|	protein_coding	-1.6558	0.00395759	-2.77504	0.00130435
ABLIM2	ENST00000509819.1|ENSG00000163995.19|OTTHUMG00000057427.25|OTTHUMT00000358890.2|ABLIM2-210|ABLIM2|1944|retained_intron|	retained_intron	-1.93719	9.54478e-10	0.259295	0.557227
ABLIM2	ENST00000505872.5|ENSG00000163995.19|OTTHUMG00000057427.25|OTTHUMT00000358886.6|ABLIM2-209|ABLIM2|1680|protein_coding|	protein_coding	-1.21277	2.04016e-11	0.106099	0.74008
ABLIM2	ENST00000361737.9|ENSG00000163995.19|OTTHUMG00000057427.25|OTTHUMT00000363009.1|ABLIM2-203|ABLIM2|3396|protein_coding|	protein_coding	-1.57791	0.00118102	-0.161996	0.859344
ABLIM2	ENST00000407564.7|ENSG00000163995.19|OTTHUMG00000057427.25|OTTHUMT00000358860.5|ABLIM2-204|ABLIM2|2291|protein_coding|	protein_coding	-3.27675	2.49296e-06	0.346225	0.674554
ABO	ENST00000453660.3|ENSG00000175164.13|OTTHUMG00000020872.5|OTTHUMT00000054907.5|ABO-201|ABO|6341|processed_transcript|	processed_transcript	-1.32649	5.5872e-12	0.208482	0.454472
ABO	ENST00000611156.4|ENSG00000175164.13|OTTHUMG00000020872.5|-|ABO-203|ABO|1577|protein_coding|	protein_coding	-1.21333	0.0461008	0.965169	0.17415
ABR	ENST00000544583.6|ENSG00000159842.14|OTTHUMG00000090313.17|OTTHUMT00000437250.1|ABR-205|ABR|5595|protein_coding|	protein_coding	1.78913	3.03101e-08	1.0386	0.041529
ABR	ENST00000572152.5|ENSG00000159842.14|OTTHUMG00000090313.17|OTTHUMT00000437257.1|ABR-216|ABR|637|nonsense_mediated_decay|	nonsense_mediated_decay	-1.01684	0.046422	-0.208629	0.825408
ABRAXAS1	ENST00000506553.5|ENSG00000163322.13|OTTHUMG00000130429.17|OTTHUMT00000367683.3|ABRAXAS1-206|ABRAXAS1|1869|protein_coding|	protein_coding	1.36385	0.0480097	0.344228	0.843726
AC002398.2	ENST00000587767.1|ENSG00000267328.1|OTTHUMG00000182297.1|OTTHUMT00000460422.1|AC002398.2-201|AC002398.2|660|antisense_RNA|	antisense_RNA	-1.1681	1.08279e-06	-0.145125	0.749976
AC002525.1	ENST00000624392.1|ENSG00000279314.1|OTTHUMG00000175978.1|OTTHUMT00000431340.1|AC002525.1-201|AC002525.1|1622|TEC|	TEC	2.00148	5.45349e-12	0.0701445	0.937595
AC003991.1	ENST00000594469.5|ENSG00000228113.7|OTTHUMG00000153895.6|OTTHUMT00000461492.1|AC003991.1-201|AC003991.1|484|antisense_RNA|	antisense_RNA	1.06494	5.04545e-05	-0.35302	0.555208
AC003991.1	ENST00000600908.5|ENSG00000228113.7|OTTHUMG00000153895.6|OTTHUMT00000461493.1|AC003991.1-209|AC003991.1|821|antisense_RNA|	antisense_RNA	3.60292	1.7471e-08	0.8994	0.568051
AC004691.2	ENST00000509504.2|ENSG00000250424.4|OTTHUMG00000162387.2|OTTHUMT00000368705.2|AC004691.2-201|AC004691.2|1531|protein_coding|	protein_coding	-1.59329	0.0111864	0.773573	0.365377
AC004816.1	ENST00000557691.1|ENSG00000259153.1|OTTHUMG00000171250.1|OTTHUMT00000412557.1|AC004816.1-202|AC004816.1|629|lincRNA|	lincRNA	1.69211	1.59863e-32	-0.0592965	0.848173
AC004816.1	ENST00000554032.1|ENSG00000259153.1|OTTHUMG00000171250.1|OTTHUMT00000412556.1|AC004816.1-201|AC004816.1|368|lincRNA|	lincRNA	1.9625	5.01614e-29	0.0879326	0.822085
AC004824.1	ENST00000439577.1|ENSG00000227751.1|OTTHUMG00000037449.1|OTTHUMT00000091165.1|AC004824.1-201|AC004824.1|311|antisense_RNA|	antisense_RNA	-1.23143	0.0214993	-0.646031	0.455831
AC004847.1	ENST00000568457.1|ENSG00000260997.1|OTTHUMG00000173373.1|OTTHUMT00000422923.1|AC004847.1-201|AC004847.1|1911|sense_overlapping|	sense_overlapping	1.10766	2.3335e-16	0.154783	0.564779
AC005035.1	ENST00000627215.1|ENSG00000281162.2|OTTHUMG00000189566.1|OTTHUMT00000479975.1|AC005035.1-201|AC005035.1|3727|lincRNA|	lincRNA	1.3927	1.64946e-14	0.154191	0.714843
AC005154.1	ENST00000578293.6|ENSG00000196295.11|OTTHUMG00000152788.10|OTTHUMT00000447699.3|AC005154.1-202|AC005154.1|999|antisense_RNA|	antisense_RNA	-1.03622	6.39646e-05	-0.0716112	0.887895
AC005154.1	ENST00000578245.5|ENSG00000196295.11|OTTHUMG00000152788.10|OTTHUMT00000447702.1|AC005154.1-212|AC005154.1|1887|retained_intron|	retained_intron	-1.12359	0.030042	0.309834	0.704001
AC005162.3	ENST00000609389.5|ENSG00000272568.5|OTTHUMG00000186196.1|OTTHUMT00000472401.1|AC005162.3-201|AC005162.3|3695|antisense_RNA|	antisense_RNA	1.04477	8.07894e-08	-0.396236	0.358737
AC005165.1	ENST00000446840.5|ENSG00000223561.6|OTTHUMG00000152594.1|OTTHUMT00000326922.1|AC005165.1-201|AC005165.1|1870|lincRNA|	lincRNA	-2.50929	1.04162e-08	-0.449981	0.421413
AC005224.4	ENST00000583262.1|ENSG00000266709.1|OTTHUMG00000178358.1|OTTHUMT00000441709.1|AC005224.4-201|AC005224.4|1652|lincRNA|	lincRNA	1.3264	2.11201e-20	-0.0347744	0.927187
AC005225.5	ENST00000623547.1|ENSG00000279026.1|OTTHUMG00000172970.1|OTTHUMT00000421547.1|AC005225.5-201|AC005225.5|2225|TEC|	TEC	-1.81247	1.51392e-12	-0.139476	0.709838
AC005324.3	ENST00000455584.2|ENSG00000251537.4|OTTHUMG00000160985.3|OTTHUMT00000363271.2|AC005324.3-201|AC005324.3|5514|protein_coding|	protein_coding	1.2826	1.30397e-13	-0.0262383	0.957749
AC005392.2	ENST00000595748.1|ENSG00000231412.2|OTTHUMG00000182827.1|OTTHUMT00000463917.1|AC005392.2-201|AC005392.2|301|lincRNA|	lincRNA	4.84851	1.50842e-32	-0.111699	0.918566
AC005520.2	ENST00000553470.1|ENSG00000259065.1|OTTHUMG00000171253.1|OTTHUMT00000412572.1|AC005520.2-202|AC005520.2|538|antisense_RNA|	antisense_RNA	-1.08764	1.25076e-05	0.0182534	0.9709
AC005703.6	ENST00000623265.1|ENSG00000279660.1|OTTHUMG00000178587.1|OTTHUMT00000442594.1|AC005703.6-201|AC005703.6|1329|TEC|	TEC	-1.16081	2.54035e-10	-0.282295	0.262606
AC005726.5	ENST00000585189.1|ENSG00000265168.1|OTTHUMG00000179308.1|OTTHUMT00000445710.1|AC005726.5-201|AC005726.5|298|antisense_RNA|	antisense_RNA	-1.50949	0.00733281	-2.48487	0.00507448
AC005833.3	ENST00000543979.1|ENSG00000255639.2|OTTHUMG00000168352.3|OTTHUMT00000399386.1|AC005833.3-201|AC005833.3|864|retained_intron|	retained_intron	1.69408	0.000112056	0.493681	0.606206
AC005944.1	ENST00000592758.1|ENSG00000267469.1|OTTHUMG00000180706.2|OTTHUMT00000452679.2|AC005944.1-201|AC005944.1|564|antisense_RNA|	antisense_RNA	-1.03617	7.59884e-27	0.0864258	0.531171
AC006030.1	ENST00000451608.2|ENSG00000264324.1|OTTHUMG00000179354.1|OTTHUMT00000445907.1|AC006030.1-201|AC006030.1|5059|nonsense_mediated_decay|	nonsense_mediated_decay	-1.29566	5.69871e-06	-0.00942749	0.987018
AC006064.4	ENST00000602946.1|ENSG00000269968.1|OTTHUMG00000183895.1|OTTHUMT00000467394.1|AC006064.4-201|AC006064.4|422|antisense_RNA|	antisense_RNA	0.654914	0.00051178	-1.4883	2.5505e-06
AC006262.1	ENST00000593980.1|ENSG00000268460.1|OTTHUMG00000182498.1|OTTHUMT00000461719.1|AC006262.1-201|AC006262.1|1316|lincRNA|	lincRNA	-1.16901	1.33978e-10	0.0990133	0.722857
AC006262.1	ENST00000596066.1|ENSG00000268460.1|OTTHUMG00000182498.1|OTTHUMT00000461720.1|AC006262.1-202|AC006262.1|3346|retained_intron|	retained_intron	-1.21323	2.47947e-11	0.178023	0.44344
AC006262.1	ENST00000598170.1|ENSG00000268460.1|OTTHUMG00000182498.1|OTTHUMT00000461721.1|AC006262.1-203|AC006262.1|1634|lincRNA|	lincRNA	-1.17477	1.37064e-12	0.268555	0.199385
AC006262.2	ENST00000599127.1|ENSG00000269729.1|OTTHUMG00000182495.1|OTTHUMT00000461710.1|AC006262.2-201|AC006262.2|612|lincRNA|	lincRNA	-2.25682	3.64527e-23	0.0546131	0.869157
AC006329.1	ENST00000419422.1|ENSG00000232445.1|OTTHUMG00000157105.1|OTTHUMT00000347448.1|AC006329.1-201|AC006329.1|705|antisense_RNA|	antisense_RNA	2.46552	5.14735e-18	0.216797	0.767718
AC006441.4	ENST00000577621.1|ENSG00000266588.1|OTTHUMG00000178947.1|OTTHUMT00000444076.1|AC006441.4-202|AC006441.4|510|lincRNA|	lincRNA	-2.24144	3.63376e-12	0.355899	0.403903
AC006460.2	ENST00000639773.1|ENSG00000284052.1|OTTHUMG00000191990.1|OTTHUMT00000491877.1|AC006460.2-203|AC006460.2|3197|bidirectional_promoter_lncRNA|	bidirectional_promoter_lncRNA	-1.18813	6.64617e-11	-0.217469	0.412399
AC007182.1	ENST00000455232.1|ENSG00000224721.1|OTTHUMG00000148657.1|OTTHUMT00000308956.1|AC007182.1-201|AC007182.1|2159|antisense_RNA|	antisense_RNA	1.50288	9.61286e-21	0.14796	0.657786
AC007240.1	ENST00000641498.1|ENSG00000284681.1|OTTHUMG00000090449.7|OTTHUMT00000492876.1|AC007240.1-201|AC007240.1|1996|nonsense_mediated_decay|	nonsense_mediated_decay	1.7052	4.98812e-14	0.565271	0.1278
AC007319.1	ENST00000412276.5|ENSG00000224063.5|OTTHUMG00000154263.2|OTTHUMT00000334575.2|AC007319.1-202|AC007319.1|829|antisense_RNA|	antisense_RNA	1.2636	2.9057e-12	0.105378	0.815665
AC007381.1	ENST00000457668.1|ENSG00000228590.1|OTTHUMG00000152619.1|OTTHUMT00000327027.1|AC007381.1-201|AC007381.1|2005|lincRNA|	lincRNA	-1.36418	5.40716e-15	0.0392624	0.88987
AC007388.1	ENST00000449569.5|ENSG00000231312.6|OTTHUMG00000152299.2|OTTHUMT00000325723.1|AC007388.1-204|AC007388.1|2517|antisense_RNA|	antisense_RNA	-1.20731	2.74415e-25	-0.391481	0.00166843
AC007608.3	ENST00000570241.2|ENSG00000260249.2|OTTHUMG00000173401.2|OTTHUMT00000422983.2|AC007608.3-202|AC007608.3|1109|antisense_RNA|	antisense_RNA	2.1007	6.33544e-17	-0.461895	0.402744
AC007744.1	ENST00000607540.1|ENSG00000271894.1|OTTHUMG00000185573.1|OTTHUMT00000470755.1|AC007744.1-201|AC007744.1|2289|processed_transcript|	processed_transcript	-1.17598	3.26195e-06	-0.0867299	0.855762
AC008264.2	ENST00000610193.1|ENSG00000273489.1|OTTHUMG00000186336.1|OTTHUMT00000472962.1|AC008264.2-201|AC008264.2|3731|antisense_RNA|	antisense_RNA	-1.93298	4.06389e-05	0.181052	0.802818
AC008440.3	ENST00000422045.1|ENSG00000232324.1|OTTHUMG00000149885.1|OTTHUMT00000313724.1|AC008440.3-201|AC008440.3|555|lincRNA|	lincRNA	-1.55982	3.47748e-14	-0.00234325	0.995515
AC008522.1	ENST00000639479.1|ENSG00000279232.2|OTTHUMG00000192175.1|OTTHUMT00000492429.1|AC008522.1-201|AC008522.1|2906|antisense_RNA|	antisense_RNA	-1.6048	7.58234e-16	0.266879	0.286881
AC008556.1	ENST00000610908.1|ENSG00000277013.1|OTTHUMG00000175767.1|OTTHUMT00000431046.1|AC008556.1-201|AC008556.1|2040|lincRNA|	lincRNA	1.37864	2.35105e-34	0.151765	0.380287
AC008575.2	ENST00000503445.5|ENSG00000272869.5|OTTHUMG00000128805.5|OTTHUMT00000372145.1|AC008575.2-201|AC008575.2|506|processed_transcript|	processed_transcript	1.02982	0.0216511	0.0100682	0.994263
AC008655.1	ENST00000595563.1|ENSG00000267815.1|OTTHUMG00000183045.1|OTTHUMT00000464780.1|AC008655.1-201|AC008655.1|457|antisense_RNA|	antisense_RNA	-2.44622	4.63075e-08	-3.79266	0.000113878
AC008669.1	ENST00000565823.1|ENSG00000260686.1|OTTHUMG00000173460.1|OTTHUMT00000423202.1|AC008669.1-201|AC008669.1|2178|sense_overlapping|	sense_overlapping	-1.1536	4.47949e-22	-0.133258	0.40192
AC008758.1	ENST00000428311.1|ENSG00000196826.7|OTTHUMG00000162246.1|OTTHUMT00000368112.1|AC008758.1-201|AC008758.1|4505|protein_coding|	protein_coding	2.10448	7.03518e-05	0.822514	0.417198
AC008771.1	ENST00000508000.5|ENSG00000249042.5|OTTHUMG00000162534.1|OTTHUMT00000369464.1|AC008771.1-201|AC008771.1|1151|antisense_RNA|	antisense_RNA	1.5525	0.00020997	-0.405124	0.70058
AC008966.1	ENST00000502171.2|ENSG00000247796.2|OTTHUMG00000162191.1|OTTHUMT00000367800.1|AC008966.1-201|AC008966.1|2367|antisense_RNA|	antisense_RNA	-1.26791	0.000567786	-0.352432	0.560297
AC008969.1	ENST00000550135.5|ENSG00000176593.7|OTTHUMG00000169805.1|OTTHUMT00000405971.1|AC008969.1-201|AC008969.1|6438|antisense_RNA|	antisense_RNA	-1.03302	2.83926e-15	-0.0280547	0.915774
AC008969.1	ENST00000546949.5|ENSG00000176593.7|OTTHUMG00000169805.1|OTTHUMT00000405972.1|AC008969.1-202|AC008969.1|2310|antisense_RNA|	antisense_RNA	-1.75949	1.54574e-10	0.196898	0.569838
AC009041.2	ENST00000563863.5|ENSG00000260807.6|OTTHUMG00000172822.2|OTTHUMT00000420707.2|AC009041.2-206|AC009041.2|1728|lincRNA|	lincRNA	-1.21806	1.03218e-07	0.204701	0.550638
AC009060.1	ENST00000502126.1|ENSG00000247228.2|OTTHUMG00000176981.2|OTTHUMT00000434586.2|AC009060.1-202|AC009060.1|2242|antisense_RNA|	antisense_RNA	-1.47344	0.0326526	0.29282	0.795287
AC009118.2	ENST00000613275.1|ENSG00000276131.1|OTTHUMG00000186952.2|OTTHUMT00000474088.2|AC009118.2-201|AC009118.2|655|antisense_RNA|	antisense_RNA	1.38136	4.82746e-05	0.708279	0.252215
AC009118.3	ENST00000622896.1|ENSG00000276259.1|OTTHUMG00000186956.1|OTTHUMT00000474093.1|AC009118.3-201|AC009118.3|873|antisense_RNA|	antisense_RNA	-1.02644	1.81849e-09	-0.133731	0.615991
AC009139.2	ENST00000569032.1|ENSG00000261063.1|OTTHUMG00000176810.1|OTTHUMT00000433892.1|AC009139.2-201|AC009139.2|566|antisense_RNA|	antisense_RNA	-1.12433	0.00202353	0.0154537	0.984583
AC009812.1	ENST00000605948.1|ENSG00000251867.3|OTTHUMG00000185497.1|OTTHUMT00000470607.1|AC009812.1-201|AC009812.1|1059|antisense_RNA|	antisense_RNA	-1.00785	1.26807e-11	-0.165902	0.440196
AC009902.2	ENST00000517670.1|ENSG00000254027.1|OTTHUMG00000164598.1|OTTHUMT00000379363.1|AC009902.2-202|AC009902.2|571|antisense_RNA|	antisense_RNA	3.16035	6.85321e-20	-0.0119444	0.99248
AC009962.1	ENST00000567327.1|ENSG00000260742.1|OTTHUMG00000176262.1|OTTHUMT00000431694.1|AC009962.1-201|AC009962.1|3813|antisense_RNA|	antisense_RNA	-1.03108	3.76292e-18	0.00611005	0.979659
AC010226.1	ENST00000508517.1|ENSG00000249249.1|OTTHUMG00000155201.2|OTTHUMT00000371006.1|AC010226.1-202|AC010226.1|539|antisense_RNA|	antisense_RNA	-1.04039	1.35907e-09	-0.19441	0.430092
AC010300.1	ENST00000600671.1|ENSG00000267934.1|OTTHUMG00000183269.1|OTTHUMT00000465894.1|AC010300.1-201|AC010300.1|5134|antisense_RNA|	antisense_RNA	-1.20409	1.31679e-15	0.100921	0.655339
AC010329.1	ENST00000593903.1|ENSG00000268416.1|OTTHUMG00000182743.1|OTTHUMT00000463423.1|AC010329.1-201|AC010329.1|8328|lincRNA|	lincRNA	-4.96155	3.68719e-12	-0.839681	0.0872503
AC010487.3	ENST00000634278.1|ENSG00000283088.1|OTTHUMG00000191567.3|OTTHUMT00000488520.3|AC010487.3-201|AC010487.3|1966|protein_coding|	protein_coding	-1.00075	0.0093763	-0.708658	0.22531
AC010503.1	ENST00000596027.1|ENSG00000268191.1|OTTHUMG00000181912.1|OTTHUMT00000458275.1|AC010503.1-201|AC010503.1|520|antisense_RNA|	antisense_RNA	-1.62614	0.000690216	-0.859454	0.297803
AC010542.2	ENST00000568560.1|ENSG00000260755.1|OTTHUMG00000175782.1|OTTHUMT00000431067.1|AC010542.2-201|AC010542.2|511|lincRNA|	lincRNA	-1.4057	0.0107289	-1.71362	0.0532878
AC011352.1	ENST00000512300.1|ENSG00000248362.1|OTTHUMG00000163422.1|OTTHUMT00000373325.1|AC011352.1-201|AC011352.1|793|antisense_RNA|	antisense_RNA	-2.75071	1.51919e-25	-0.0027765	0.994428
AC011352.3	ENST00000505162.1|ENSG00000251320.1|OTTHUMG00000163419.1|OTTHUMT00000373312.1|AC011352.3-201|AC011352.3|593|antisense_RNA|	antisense_RNA	-2.92194	1.04348e-29	-0.227764	0.252215
AC011446.2	ENST00000586483.1|ENSG00000267598.1|OTTHUMG00000180791.1|OTTHUMT00000453034.1|AC011446.2-201|AC011446.2|465|antisense_RNA|	antisense_RNA	2.48104	0.000293643	2.6531	0.00344275
AC011473.4	ENST00000250366.6|ENSG00000269741.5|OTTHUMG00000183088.1|OTTHUMT00000465045.1|AC011473.4-202|AC011473.4|1602|nonsense_mediated_decay|	nonsense_mediated_decay	4.3232	2.82298e-47	0.331202	0.478924
AC011481.3	ENST00000623895.1|ENSG00000280087.1|OTTHUMG00000180843.1|OTTHUMT00000453244.1|AC011481.3-201|AC011481.3|5594|TEC|	TEC	-1.54952	5.62581e-18	-0.361028	0.0866353
AC011484.1	ENST00000377652.4|ENSG00000204850.4|OTTHUMG00000186768.2|OTTHUMT00000473742.2|AC011484.1-201|AC011484.1|1995|antisense_RNA|	antisense_RNA	1.21263	0.00914806	0.792281	0.312644
AC011503.1	ENST00000598914.1|ENSG00000269289.5|OTTHUMG00000183389.1|OTTHUMT00000466445.1|AC011503.1-202|AC011503.1|919|antisense_RNA|	antisense_RNA	-3.03895	2.79552e-14	-0.243746	0.736215
AC012531.2	ENST00000512206.1|ENSG00000273046.1|OTTHUMG00000186499.1|OTTHUMT00000473247.1|AC012531.2-201|AC012531.2|1389|processed_transcript|	processed_transcript	-1.06895	2.78497e-05	0.045442	0.926698
AC015563.2	ENST00000579580.1|ENSG00000264982.1|OTTHUMG00000179742.1|OTTHUMT00000447905.1|AC015563.2-201|AC015563.2|772|antisense_RNA|	antisense_RNA	1.67306	0.000306637	0.268616	0.830454
AC015674.1	ENST00000578482.1|ENSG00000264558.1|OTTHUMG00000178285.1|OTTHUMT00000441360.1|AC015674.1-201|AC015674.1|267|antisense_RNA|	antisense_RNA	1.08121	0.0432887	0.217674	0.87258
AC015871.3	ENST00000618835.1|ENSG00000278600.1|OTTHUMG00000176726.2|OTTHUMT00000433312.2|AC015871.3-201|AC015871.3|2261|sense_intronic|	sense_intronic	-1.11273	3.72979e-31	0.0375419	0.802069
AC015912.3	ENST00000619432.1|ENSG00000274213.1|OTTHUMG00000186667.1|OTTHUMT00000473582.1|AC015912.3-201|AC015912.3|348|lincRNA|	lincRNA	1.62018	2.97692e-15	0.000962601	0.998606
AC016582.3	ENST00000443870.3|ENSG00000267640.6|OTTHUMG00000182155.3|OTTHUMT00000459787.2|AC016582.3-202|AC016582.3|6580|processed_transcript|	processed_transcript	-1.26429	8.2334e-17	-0.0259032	0.927191
AC016629.3	ENST00000596427.1|ENSG00000269600.1|OTTHUMG00000183526.1|OTTHUMT00000466990.1|AC016629.3-202|AC016629.3|890|antisense_RNA|	antisense_RNA	-4.56765	1.32719e-14	-0.730916	0.233172
AC016708.1	ENST00000607412.1|ENSG00000229267.2|OTTHUMG00000154799.2|OTTHUMT00000337107.2|AC016708.1-201|AC016708.1|1909|antisense_RNA|	antisense_RNA	-1.44297	2.89967e-13	-0.133341	0.625598
AC018557.1	ENST00000569274.1|ENSG00000260465.1|OTTHUMG00000173475.1|OTTHUMT00000423238.1|AC018557.1-201|AC018557.1|1790|antisense_RNA|	antisense_RNA	-1.50591	8.91612e-05	0.844647	0.0357406
AC019069.1	ENST00000610008.1|ENSG00000272711.1|OTTHUMG00000185987.1|OTTHUMT00000471923.1|AC019069.1-201|AC019069.1|1333|lincRNA|	lincRNA	1.65989	4.22351e-31	-0.00167716	0.996674
AC019080.1	ENST00000397057.6|ENSG00000213963.6|OTTHUMG00000132531.13|OTTHUMT00000255731.2|AC019080.1-201|AC019080.1|5202|sense_overlapping|	sense_overlapping	-2.16378	2.2074e-06	-0.482651	0.477554
AC019117.3	ENST00000637807.1|ENSG00000283321.1|OTTHUMG00000191686.1|OTTHUMT00000489400.1|AC019117.3-201|AC019117.3|3523|protein_coding|	protein_coding	-1.98676	0.000191995	-0.710232	0.398217
AC020763.4	ENST00000623414.1|ENSG00000279569.1|OTTHUMG00000177024.1|OTTHUMT00000434930.1|AC020763.4-201|AC020763.4|4170|TEC|	TEC	-1.37197	1.00311e-14	0.600428	0.00111106
AC022075.1	ENST00000500682.1|ENSG00000245648.1|OTTHUMG00000168533.4|OTTHUMT00000400338.1|AC022075.1-201|AC022075.1|2830|antisense_RNA|	antisense_RNA	1.99255	8.41414e-36	0.0324381	0.929092
AC022384.1	ENST00000437082.5|ENSG00000272410.5|OTTHUMG00000185357.1|OTTHUMT00000470312.1|AC022384.1-201|AC022384.1|2270|nonsense_mediated_decay|	nonsense_mediated_decay	1.18375	0.00154901	0.0810266	0.93412
AC023024.2	ENST00000623561.1|ENSG00000279970.1|OTTHUMG00000177245.1|OTTHUMT00000435970.1|AC023024.2-201|AC023024.2|1993|TEC|	TEC	1.05826	1.51774e-15	0.125885	0.662601
AC025165.2	ENST00000549477.1|ENSG00000257342.1|OTTHUMG00000170379.1|OTTHUMT00000408772.1|AC025165.2-201|AC025165.2|699|antisense_RNA|	antisense_RNA	-1.82361	0.0221686	-1.8965	0.14392
AC026333.3	ENST00000543611.1|ENSG00000256249.1|OTTHUMG00000168862.1|OTTHUMT00000401413.1|AC026333.3-201|AC026333.3|1731|lincRNA|	lincRNA	1.48392	2.84613e-05	-0.0295549	0.979064
AC027228.2	ENST00000567141.1|ENSG00000261762.1|OTTHUMG00000177203.1|OTTHUMT00000435831.1|AC027228.2-201|AC027228.2|2154|antisense_RNA|	antisense_RNA	1.78354	1.81002e-15	-0.110501	0.862069
AC034206.1	ENST00000514446.1|ENSG00000250167.1|OTTHUMG00000163105.2|OTTHUMT00000371683.1|AC034206.1-202|AC034206.1|634|antisense_RNA|	antisense_RNA	-1.03599	4.24933e-12	0.124534	0.570577
AC036108.2	ENST00000566974.1|ENSG00000261054.1|OTTHUMG00000177237.1|OTTHUMT00000435962.1|AC036108.2-201|AC036108.2|2562|antisense_RNA|	antisense_RNA	-1.50133	0.00119676	0.111321	0.910555
AC048338.1	ENST00000535844.1|ENSG00000256861.1|OTTHUMG00000168918.1|OTTHUMT00000401605.1|AC048338.1-201|AC048338.1|2748|nonsense_mediated_decay|	nonsense_mediated_decay	2.45017	3.90974e-06	0.831051	0.419822
AC051649.2	ENST00000640310.1|ENSG00000283787.1|OTTHUMG00000191981.1|OTTHUMT00000491672.1|AC051649.2-201|AC051649.2|3319|protein_coding|	protein_coding	-1.86854	1.43664e-24	0.196443	0.348694
AC055854.1	ENST00000521141.1|ENSG00000253125.1|OTTHUMG00000163751.1|OTTHUMT00000375192.1|AC055854.1-203|AC055854.1|1630|antisense_RNA|	antisense_RNA	-1.44195	4.6334e-05	-0.570273	0.298992
AC055854.1	ENST00000519624.1|ENSG00000253125.1|OTTHUMG00000163751.1|OTTHUMT00000375191.1|AC055854.1-202|AC055854.1|292|retained_intron|	retained_intron	-1.25574	0.00425269	-0.438876	0.605527
AC055854.1	ENST00000523627.1|ENSG00000253125.1|OTTHUMG00000163751.1|OTTHUMT00000375190.1|AC055854.1-201|AC055854.1|570|antisense_RNA|	antisense_RNA	-1.97562	1.46766e-05	-0.414653	0.47888
AC061975.7	ENST00000592016.1|ENSG00000267259.1|OTTHUMG00000179417.1|OTTHUMT00000446189.1|AC061975.7-201|AC061975.7|2692|lincRNA|	lincRNA	-1.4082	0.000133355	0.236052	0.641835
AC064807.2	ENST00000521188.1|ENSG00000253844.1|OTTHUMG00000164266.1|OTTHUMT00000378009.1|AC064807.2-201|AC064807.2|672|lincRNA|	lincRNA	-3.27919	1.47152e-20	-0.800716	0.0830115
AC064853.3	ENST00000641801.1|ENSG00000284631.1|OTTHUMG00000192256.1|OTTHUMT00000493036.1|AC064853.3-201|AC064853.3|1658|protein_coding|	protein_coding	-1.06508	0.0290172	0.145435	0.878023
AC068385.1	ENST00000533218.1|ENSG00000255498.1|OTTHUMG00000167003.1|OTTHUMT00000392393.1|AC068385.1-201|AC068385.1|409|antisense_RNA|	antisense_RNA	-1.09262	0.000160283	0.570746	0.068824
AC068547.1	ENST00000636024.1|ENSG00000283228.1|OTTHUMG00000191700.3|OTTHUMT00000489592.1|AC068547.1-201|AC068547.1|1303|nonsense_mediated_decay|	nonsense_mediated_decay	2.34243	3.83362e-18	0.752565	0.0799122
AC068580.3	ENST00000449248.1|ENSG00000235027.1|OTTHUMG00000045360.2|OTTHUMT00000105341.2|AC068580.3-201|AC068580.3|2015|antisense_RNA|	antisense_RNA	1.1481	1.34246e-17	0.254015	0.2695
AC068580.4	ENST00000427721.3|ENSG00000250644.3|OTTHUMG00000161994.5|OTTHUMT00000489875.1|AC068580.4-204|AC068580.4|1007|protein_coding|	protein_coding	1.42697	1.21322e-11	1.0661	0.000125739
AC068580.4	ENST00000636615.1|ENSG00000250644.3|OTTHUMG00000161994.5|OTTHUMT00000366678.5|AC068580.4-201|AC068580.4|2228|protein_coding|	protein_coding	1.28585	3.08307e-19	0.132534	0.64709
AC068580.4	ENST00000636579.1|ENSG00000250644.3|OTTHUMG00000161994.5|OTTHUMT00000489873.1|AC068580.4-202|AC068580.4|350|protein_coding|	protein_coding	1.19264	0.000122419	0.364637	0.585463
AC068587.6	ENST00000641839.1|ENSG00000283674.2|OTTHUMG00000191723.2|OTTHUMT00000492936.1|AC068587.6-202|AC068587.6|5619|processed_transcript|	processed_transcript	-1.01324	0.00191072	0.28619	0.572224
AC068888.1	ENST00000552905.5|ENSG00000257337.6|OTTHUMG00000169806.5|OTTHUMT00000406025.1|AC068888.1-202|AC068888.1|523|antisense_RNA|	antisense_RNA	-1.64491	1.54922e-14	0.0298886	0.934557
AC073349.1	ENST00000340779.3|ENSG00000189316.3|OTTHUMG00000156628.1|OTTHUMT00000344858.1|AC073349.1-201|AC073349.1|1062|antisense_RNA|	antisense_RNA	-1.34853	2.08136e-11	0.284161	0.209306
AC073508.2	ENST00000476049.1|ENSG00000264058.1|OTTHUMG00000179656.1|OTTHUMT00000447539.1|AC073508.2-201|AC073508.2|2502|nonsense_mediated_decay|	nonsense_mediated_decay	-1.30289	0.000294491	-0.132415	0.831275
AC073957.2	ENST00000549241.1|ENSG00000257607.1|OTTHUMG00000169520.1|OTTHUMT00000404580.1|AC073957.2-201|AC073957.2|1562|antisense_RNA|	antisense_RNA	-1.06412	5.00452e-07	-0.200965	0.59356
AC074386.1	ENST00000476560.1|ENSG00000284644.1|OTTHUMG00000192268.1|OTTHUMT00000493080.1|AC074386.1-201|AC074386.1|767|antisense_RNA|	antisense_RNA	-1.32926	0.000316885	-0.403611	0.463719
AC078927.1	ENST00000539652.1|ENSG00000228144.2|OTTHUMG00000168972.1|OTTHUMT00000401830.1|AC078927.1-201|AC078927.1|984|nonsense_mediated_decay|	nonsense_mediated_decay	1.14255	0.000794221	-0.388908	0.629872
AC080038.1	ENST00000611274.1|ENSG00000274565.1|OTTHUMG00000186687.1|OTTHUMT00000473609.1|AC080038.1-201|AC080038.1|1154|antisense_RNA|	antisense_RNA	-1.36749	2.16488e-15	-0.174756	0.464322
AC083837.1	ENST00000565297.1|ENSG00000261618.1|OTTHUMG00000173421.1|OTTHUMT00000423044.1|AC083837.1-201|AC083837.1|2994|lincRNA|	lincRNA	1.94478	3.66667e-24	0.217478	0.581053
AC084759.3	ENST00000624468.1|ENSG00000280362.1|OTTHUMG00000176909.1|OTTHUMT00000434296.1|AC084759.3-201|AC084759.3|3944|TEC|	TEC	-1.05911	0.000414013	0.258518	0.554531
AC087190.4	ENST00000574616.2|ENSG00000263244.2|OTTHUMG00000178148.2|OTTHUMT00000440762.2|AC087190.4-201|AC087190.4|8334|3prime_overlapping_ncRNA|	3prime_overlapping_ncRNA	-6.21163	3.47238e-06	-1.42434	0.279978
AC087289.3	ENST00000590947.5|ENSG00000267426.5|OTTHUMG00000180026.2|OTTHUMT00000449335.2|AC087289.3-201|AC087289.3|1886|nonsense_mediated_decay|	nonsense_mediated_decay	1.11742	0.000547284	0.533409	0.369064
AC087525.1	ENST00000559821.2|ENSG00000259459.5|OTTHUMG00000172301.2|OTTHUMT00000417759.2|AC087525.1-202|AC087525.1|1988|lincRNA|	lincRNA	-1.60893	4.07705e-07	-0.249653	0.575578
AC087632.1	ENST00000625619.1|ENSG00000259316.10|OTTHUMG00000172470.9|-|AC087632.1-216|AC087632.1|487|protein_coding|	protein_coding	2.2998	7.04176e-06	-0.0190574	0.992143
AC087632.1	ENST00000634529.1|ENSG00000259316.10|OTTHUMG00000172470.9|OTTHUMT00000488177.1|AC087632.1-207|AC087632.1|372|processed_transcript|	processed_transcript	2.63552	8.912e-07	0.291188	0.858292
AC087762.2	ENST00000639346.1|ENSG00000279588.2|OTTHUMG00000192058.1|OTTHUMT00000492118.1|AC087762.2-201|AC087762.2|3773|TEC|	TEC	1.66493	1.26972e-17	-0.0267541	0.963081
AC090971.1	ENST00000559302.1|ENSG00000259185.1|OTTHUMG00000172539.1|OTTHUMT00000419017.1|AC090971.1-201|AC090971.1|510|antisense_RNA|	antisense_RNA	1.48055	0.00508514	0.661172	0.524859
AC091163.1	ENST00000524012.1|ENSG00000253745.1|OTTHUMG00000164136.1|OTTHUMT00000377396.1|AC091163.1-201|AC091163.1|605|lincRNA|	lincRNA	-4.43087	5.91103e-09	-0.54619	0.575188
AC091182.2	ENST00000520431.1|ENSG00000253746.1|OTTHUMG00000164278.1|OTTHUMT00000378073.1|AC091182.2-201|AC091182.2|578|lincRNA|	lincRNA	2.94872	1.71752e-32	-0.215948	0.6942
AC091564.5	ENST00000526456.1|ENSG00000255390.1|OTTHUMG00000165533.1|OTTHUMT00000384692.1|AC091564.5-201|AC091564.5|820|antisense_RNA|	antisense_RNA	-1.11664	2.87217e-07	-0.155006	0.704654
AC091729.1	ENST00000449721.1|ENSG00000224079.1|OTTHUMG00000151481.1|OTTHUMT00000322842.1|AC091729.1-201|AC091729.1|869|antisense_RNA|	antisense_RNA	-1.72195	2.34229e-09	0.271865	0.412578
AC092139.2	ENST00000563750.1|ENSG00000272923.1|OTTHUMG00000176271.2|OTTHUMT00000432302.1|AC092139.2-201|AC092139.2|754|lincRNA|	lincRNA	-1.83239	3.11031e-26	0.194245	0.316343
AC092279.1	ENST00000594934.5|ENSG00000268362.5|OTTHUMG00000183392.1|OTTHUMT00000466448.1|AC092279.1-201|AC092279.1|1864|lincRNA|	lincRNA	-1.76355	5.20538e-09	-0.295959	0.505058
AC092279.1	ENST00000597683.1|ENSG00000268362.5|OTTHUMG00000183392.1|OTTHUMT00000466449.1|AC092279.1-202|AC092279.1|1966|lincRNA|	lincRNA	-2.44463	1.37783e-05	-0.228727	0.757059
AC092329.4	ENST00000639752.1|ENSG00000284428.1|OTTHUMG00000183235.2|OTTHUMT00000465753.1|AC092329.4-203|AC092329.4|556|lincRNA|	lincRNA	-1.67112	0.000316227	-0.165239	0.861247
AC092375.2	ENST00000567370.1|ENSG00000260306.1|OTTHUMG00000175457.1|OTTHUMT00000430026.1|AC092375.2-201|AC092375.2|1665|lincRNA|	lincRNA	-0.846861	0.00556372	-1.11318	0.0226452
AC092376.2	ENST00000622621.1|ENSG00000277954.1|OTTHUMG00000176937.2|OTTHUMT00000434358.2|AC092376.2-201|AC092376.2|4116|antisense_RNA|	antisense_RNA	-1.65196	6.26801e-20	-0.391999	0.0660963
AC092718.4	ENST00000566639.1|ENSG00000261061.1|OTTHUMG00000176424.1|OTTHUMT00000431965.1|AC092718.4-201|AC092718.4|716|sense_intronic|	sense_intronic	1.92514	1.29545e-08	-0.0235689	0.983895
[truncated: 12,084 more rows]

## Sheet: Supplementary Table 1. C 
gene	transcript	transcript_type	log2fc_LvsH	FDR_LvsH	log2fc_NLvsH	FDR_NLvsH
[truncated: 450 more rows]

[truncated: 17 more sheets: Supplementary Table 1. D, Supplementary table 1. E, Supplementary table 1. F, Supplementary Table 1. G, Supplementary Table 1. H, Supplementary Table 1. I , Supplementary Table 1. J, Supplementary Table 1. K , Supplementary Table 1. L, Supplementary Table 1. M, Supplementary Table 1. N, Supplementary Table 1. O, Supplementary Table 1.P, supplementary Table 1. Q, Supplementary Table 1. R, Supplementary Table 1.S, Supplementary Table 1.T]
